# Supplementary material for: Linkage Disequilibrium and Effective Population Size of Buffalo Populations of Iran, Turkey, Pakistan, and Egypt Using a Medium Density SNP Array
Source: Front Genet. 2021 Dec 7;12:608186. doi: 10.3389/fgene.2021.608186 (PMC8689148; doi:10.3389/fgene.2021.608186)
Supplement: Supplementary file 14 [file Table5.XLSX]

## Sheet: PLPD_Main_File
Averaged r2 for Studied populations										SQRT(r2) for Studied populations									Correlation_ output ()Presistency of Linkage Disequblirioum between pairs of populations (Contain 36 Column)
AZI	KHU	MAZ	IR	TUR	EGY	KUN	NIL	PAK		AZI	KHU	MAZ	IR	ANA	EGY	KUN	NIL	PAK
r2means	r2means	r2means	r2means	r2means	r2means	r2means	r2means	r2means											Distance (Kb)	AZI_KHU	AZI_MAZ	AZI_IR	AZI_TANA	AZI_EGY	AZI_KUN	AZI_NIL	AZI_PAK	KHU_MAZ	KHU_IR	KHU_ANA	KHU_EGY	KHU_KUN	KHU_NIL	KHU_PAK	MAZ_IR	MAZ_ANA	MAZ_EGY	MAZ_KUN	MAZ_NIL	MAZ_PAK	IR-ANA	IR_EGY	IR_KUN	IR_NIL	IR_PAK	ANA-EGY	ANA-KUN	ANA-NIL	ANA_PAK
0.574492	0.542954	0.533262	0.478585	0.5368	0.554831	0.518714	0.520908	0.521154	1	0.757953	0.736854	0.730248	0.691798	0.732666	0.74487	0.720218	0.721739	0.72191	1	0.953231	0.941733	0.963579	0.949436	0.966262	0.894612	0.964673	0.963386	0.959046	0.977359	0.941164	0.955563	0.924289	0.947653	0.962483	0.962862	0.948226	0.948916	0.914181	0.948185	0.957916	0.956086	0.969323	0.918589	0.965623	0.957916	0.956086	0.924932	0.974134	0.969323
0.536333	0.553967	0.533483	0.450383	0.549267	0.5626	0.5084	0.474533	0.495583	2	0.732348	0.744289	0.730399	0.671106	0.741125	0.750067	0.713022	0.688864	0.703977	2	0.952431	0.93857	0.961025	0.949329	0.963962	0.890642	0.963855	0.96221	0.957369	0.979135	0.939166	0.956037	0.921376	0.945553	0.961045	0.961743	0.946472	0.946647	0.910438	0.945722	0.955717	0.957653	0.966709	0.916772	0.965891	0.955717	0.957653	0.92233	0.973336	0.966709
0.459119	0.563643	0.550119	0.484405	0.632714	0.500881	0.599238	0.547429	0.569333	3	0.677583	0.750762	0.7417	0.695992	0.795433	0.707729	0.774105	0.739884	0.754542	3	0.949734	0.934989	0.958998	0.946894	0.963997	0.886025	0.964114	0.960664	0.955191	0.978969	0.936516	0.95634	0.918364	0.944595	0.959522	0.959685	0.944173	0.944844	0.907049	0.945549	0.95416	0.956968	0.964456	0.914792	0.968818	0.95416	0.956968	0.91934	0.973019	0.964456
0.57544	0.57478	0.50334	0.40896	0.63468	0.48402	0.536857	0.563429	0.58366	4	0.758578	0.758142	0.709465	0.6395	0.796668	0.695715	0.732705	0.750619	0.763976	4	0.952108	0.939315	0.971053	0.955066	0.966939	0.893777	0.967863	0.966868	0.952421	0.980305	0.932939	0.95373	0.914724	0.941164	0.957258	0.956759	0.939432	0.941337	0.899112	0.941707	0.950392	0.952171	0.964411	0.905543	0.968333	0.950392	0.952171	0.9105	0.971839	0.964411
0.501422	0.629067	0.589444	0.397378	0.576978	0.479644	0.544791	0.510667	0.524289	5	0.708112	0.793137	0.767753	0.630379	0.759591	0.692564	0.738099	0.714609	0.724078	5	0.948512	0.938135	0.969303	0.951046	0.966235	0.885995	0.96486	0.963876	0.950638	0.978925	0.928329	0.951313	0.908699	0.936419	0.954392	0.954477	0.940385	0.93762	0.894415	0.939239	0.950936	0.950216	0.962505	0.899007	0.966177	0.950936	0.950216	0.904515	0.969873	0.962505
0.478436	0.559764	0.486436	0.403782	0.498382	0.471436	0.577235	0.476618	0.469255	6	0.691691	0.748174	0.69745	0.635438	0.705962	0.686612	0.75976	0.690375	0.685022	6	0.952734	0.942927	0.968197	0.949954	0.964481	0.880636	0.963231	0.96296	0.943712	0.981421	0.922631	0.953506	0.900961	0.936477	0.952935	0.955505	0.936912	0.940202	0.885743	0.940856	0.950106	0.946707	0.960205	0.891656	0.964115	0.950106	0.946707	0.896553	0.968667	0.960205
0.544556	0.518302	0.531127	0.382254	0.521571	0.46081	0.510246	0.464274	0.466397	7	0.73794	0.719932	0.728785	0.618267	0.722199	0.67883	0.714315	0.681377	0.682933	7	0.953702	0.940024	0.969335	0.948256	0.963387	0.881878	0.961692	0.961757	0.942514	0.979899	0.921121	0.95176	0.891738	0.935233	0.95167	0.954547	0.933699	0.937113	0.884775	0.937988	0.947415	0.946074	0.95855	0.882456	0.964078	0.947415	0.946074	0.898	0.967282	0.95855
0.384237	0.417492	0.353136	0.277932	0.425085	0.39078	0.411103	0.419552	0.396932	8	0.619869	0.646136	0.594252	0.527193	0.651985	0.625124	0.641173	0.647728	0.630026	8	0.951365	0.933665	0.967049	0.94558	0.962961	0.87254	0.962848	0.960876	0.938952	0.978606	0.916374	0.949306	0.884954	0.932656	0.94907	0.951078	0.929887	0.934091	0.873803	0.938409	0.945532	0.942674	0.956215	0.8734	0.963828	0.945532	0.942674	0.891456	0.966315	0.956215
0.419267	0.527267	0.445911	0.325756	0.365511	0.419244	0.332622	0.369205	0.314422	9	0.647508	0.726131	0.667766	0.57075	0.604575	0.647491	0.576734	0.607622	0.560734	9	0.951812	0.941539	0.967882	0.946094	0.963338	0.872654	0.964406	0.963216	0.948533	0.978906	0.916266	0.949223	0.884489	0.932947	0.950287	0.963642	0.942283	0.945609	0.885152	0.955234	0.963553	0.942169	0.955894	0.872466	0.96333	0.963553	0.942169	0.890673	0.966227	0.955894
0.5155	0.480381	0.423714	0.364214	0.499286	0.447667	0.395	0.502048	0.418143	10	0.717983	0.693095	0.650933	0.603502	0.706602	0.669079	0.62849	0.708553	0.64664	10	0.958568	0.940438	0.968837	0.95031	0.96285	0.88608	0.965115	0.966345	0.952331	0.980236	0.939856	0.951686	0.925923	0.946783	0.972143	0.963254	0.948117	0.943846	0.901323	0.956629	0.968186	0.953416	0.95456	0.896396	0.968348	0.968186	0.953416	0.894654	0.967583	0.95456
0.396137	0.459549	0.45651	0.342216	0.441706	0.368118	0.370163	0.44034	0.420471	11	0.629394	0.6779	0.675655	0.584992	0.66461	0.606727	0.60841	0.663581	0.648437	11	0.957901	0.950217	0.966474	0.948181	0.961976	0.899453	0.962181	0.968284	0.95515	0.980517	0.936894	0.949416	0.93233	0.944376	0.971223	0.97225	0.952496	0.947486	0.901226	0.966002	0.969925	0.951079	0.952746	0.908692	0.965393	0.969925	0.951079	0.901736	0.966165	0.952746
0.43998	0.42251	0.405469	0.271061	0.326143	0.337367	0.440109	0.353306	0.339306	12	0.66331	0.650008	0.636765	0.520635	0.571089	0.580833	0.663407	0.594396	0.5825	12	0.95953	0.951246	0.973764	0.948256	0.9621	0.901466	0.964875	0.970978	0.95243	0.981153	0.935581	0.952743	0.941392	0.942415	0.970178	0.972178	0.950374	0.951783	0.907758	0.964233	0.968347	0.952818	0.963395	0.925839	0.964792	0.968347	0.952818	0.907111	0.965975	0.963395
0.414043	0.38017	0.447064	0.263681	0.430617	0.375319	0.29913	0.479149	0.381915	13	0.643461	0.616579	0.668628	0.513499	0.656214	0.612633	0.546928	0.692206	0.617993	13	0.959416	0.95493	0.974138	0.967031	0.972866	0.89853	0.969685	0.974151	0.951458	0.980734	0.94501	0.956682	0.941269	0.942889	0.970241	0.972645	0.955282	0.953023	0.90914	0.963947	0.967849	0.963786	0.968508	0.925072	0.966124	0.967849	0.963786	0.922838	0.970454	0.968508
0.365409	0.445886	0.411455	0.238932	0.426068	0.370455	0.456357	0.356068	0.374455	14	0.604491	0.667747	0.641447	0.488807	0.652739	0.60865	0.675542	0.596714	0.611927	14	0.963258	0.954141	0.974032	0.966478	0.973659	0.927162	0.9744	0.97365	0.957191	0.98308	0.948192	0.957466	0.951907	0.961206	0.974361	0.973062	0.954695	0.95469	0.943289	0.965983	0.967209	0.963379	0.968471	0.94841	0.97355	0.967209	0.963379	0.950288	0.975935	0.968471
0.291744	0.385628	0.410814	0.231419	0.362023	0.306465	0.468	0.352317	0.315628	15	0.540133	0.620989	0.640948	0.48106	0.601684	0.553593	0.684105	0.593563	0.561808	15	0.966831	0.953264	0.97411	0.968057	0.973935	0.933692	0.974428	0.976133	0.955288	0.985668	0.945918	0.959306	0.950532	0.962488	0.973253	0.972394	0.954424	0.953321	0.945335	0.965341	0.966909	0.964596	0.968539	0.954238	0.973545	0.966909	0.964596	0.950317	0.976837	0.968539
0.403512	0.367415	0.388293	0.202512	0.427	0.386073	0.409025	0.370707	0.348585	16	0.635226	0.606147	0.623131	0.450014	0.653452	0.621348	0.639551	0.608857	0.590411	16	0.974068	0.964892	0.981196	0.972913	0.974411	0.969807	0.983709	0.983302	0.955813	0.985606	0.946479	0.963677	0.960878	0.9627	0.973274	0.972799	0.956055	0.961177	0.950608	0.965385	0.967346	0.964932	0.972989	0.965043	0.973594	0.967346	0.964932	0.964727	0.977716	0.972989
0.434036	0.469321	0.431357	0.278393	0.349375	0.386018	0.428109	0.402179	0.397179	17	0.658814	0.68507	0.656778	0.527629	0.59108	0.621303	0.6543	0.634176	0.630221	17	0.978604	0.967701	0.988357	0.972357	0.973862	0.969282	0.983631	0.983088	0.955885	0.985786	0.951666	0.966731	0.964607	0.965563	0.97603	0.973861	0.95936	0.963351	0.953005	0.967041	0.969176	0.973019	0.978829	0.971445	0.978733	0.969176	0.973019	0.964058	0.977666	0.978829
0.495192	0.47326	0.505562	0.343507	0.544	0.512164	0.533942	0.519849	0.516082	18	0.703699	0.687939	0.711029	0.586095	0.737564	0.715657	0.730713	0.721006	0.718389	18	0.978081	0.967431	0.988452	0.984213	0.975004	0.968421	0.982929	0.982375	0.956422	0.986947	0.967864	0.969583	0.964259	0.964776	0.975209	0.973262	0.966121	0.962938	0.951963	0.966142	0.968922	0.980632	0.978838	0.97074	0.978038	0.968922	0.980632	0.973186	0.986569	0.978838
0.570125	0.521025	0.528863	0.3958	0.644825	0.466687	0.519649	0.567231	0.513625	19	0.755066	0.721821	0.727229	0.629126	0.80301	0.683145	0.720867	0.753147	0.716676	19	0.977707	0.963484	0.98735	0.982834	0.973733	0.967809	0.982736	0.982153	0.954102	0.986806	0.968552	0.973585	0.970749	0.968033	0.97981	0.969946	0.96117	0.957581	0.945654	0.961764	0.964714	0.979617	0.979517	0.972521	0.978446	0.964714	0.979617	0.970998	0.985299	0.979517
0.421938	0.445416	0.44108	0.28546	0.443556	0.419369	0.444767	0.394613	0.380451	20	0.649568	0.667395	0.664138	0.534284	0.666	0.647587	0.666909	0.628182	0.616807	20	0.979499	0.957324	0.985942	0.98004	0.978798	0.960974	0.978961	0.979887	0.949298	0.986076	0.976628	0.971172	0.967007	0.971407	0.978399	0.964373	0.957353	0.956113	0.934331	0.956127	0.958589	0.982049	0.979974	0.967268	0.977373	0.958589	0.982049	0.970199	0.981623	0.979974
0.384337	0.418575	0.425508	0.276214	0.416952	0.419856	0.400795	0.360949	0.350016	21	0.619949	0.646974	0.65231	0.52556	0.645719	0.647963	0.633083	0.60079	0.591621	21	0.978341	0.955063	0.985087	0.97877	0.977388	0.959123	0.977758	0.978841	0.946625	0.984739	0.974864	0.968974	0.966298	0.969514	0.977262	0.962402	0.954856	0.953488	0.930955	0.953735	0.95644	0.981227	0.978958	0.965709	0.97616	0.95644	0.981227	0.967746	0.980646	0.978958
0.40005	0.421313	0.411985	0.267782	0.415844	0.385274	0.398261	0.367429	0.349814	22	0.632495	0.649086	0.641861	0.517476	0.64486	0.620704	0.631079	0.606159	0.591451	22	0.977683	0.954065	0.985491	0.978287	0.97978	0.957344	0.977195	0.97837	0.944919	0.984695	0.973211	0.970049	0.963848	0.968642	0.976563	0.960937	0.952589	0.952499	0.927885	0.95264	0.954993	0.979769	0.978583	0.963876	0.9762	0.954993	0.979769	0.966597	0.98013	0.978583
0.3841	0.395487	0.405979	0.248409	0.395868	0.379641	0.380198	0.352504	0.331116	23	0.619758	0.628878	0.637165	0.498406	0.629181	0.61615	0.616602	0.59372	0.575427	23	0.976745	0.953032	0.984891	0.977287	0.978818	0.955466	0.976444	0.977491	0.943097	0.984044	0.971905	0.969183	0.962816	0.967577	0.975856	0.960074	0.951658	0.950734	0.925074	0.951248	0.953523	0.978846	0.977633	0.962284	0.975413	0.953523	0.978846	0.964669	0.979442	0.977633
0.373832	0.427432	0.412653	0.257084	0.393133	0.376508	0.372663	0.351665	0.324767	24	0.611418	0.653783	0.642381	0.507035	0.627003	0.613603	0.610462	0.593013	0.569883	24	0.976899	0.951922	0.984621	0.976666	0.978163	0.955253	0.97602	0.977097	0.942107	0.983971	0.971954	0.969259	0.961995	0.967177	0.97554	0.959037	0.950533	0.949659	0.923409	0.950049	0.95228	0.978416	0.977122	0.961902	0.974908	0.95228	0.978416	0.964539	0.979077	0.977122
0.373983	0.401027	0.403167	0.248199	0.386376	0.362423	0.36708	0.347619	0.322596	25	0.611542	0.633267	0.634954	0.498195	0.621592	0.602016	0.605872	0.589592	0.567975	25	0.977443	0.951207	0.984561	0.976362	0.977864	0.955359	0.975669	0.976744	0.940851	0.98366	0.971656	0.968808	0.964444	0.967328	0.976304	0.957954	0.949486	0.948499	0.924061	0.949294	0.951841	0.977873	0.976546	0.962637	0.974511	0.951841	0.977873	0.9652	0.978776	0.976546
0.370041	0.392714	0.399826	0.242854	0.379062	0.368563	0.384242	0.345594	0.3197	26	0.60831	0.626669	0.632318	0.492803	0.61568	0.607094	0.619873	0.587873	0.565421	26	0.975952	0.949871	0.983471	0.975571	0.977375	0.955967	0.974909	0.97619	0.939156	0.983384	0.970655	0.967215	0.96406	0.965049	0.97522	0.956766	0.948259	0.947209	0.923699	0.947688	0.950729	0.977096	0.975497	0.963065	0.972752	0.950729	0.977096	0.965961	0.977856	0.975497
0.353991	0.390161	0.397825	0.235381	0.386366	0.366805	0.37136	0.34526	0.318071	27	0.594972	0.624628	0.630734	0.485161	0.621584	0.605644	0.609393	0.587588	0.563978	27	0.975289	0.948011	0.98306	0.97524	0.97697	0.955211	0.972772	0.974889	0.937851	0.983169	0.969426	0.966693	0.963432	0.963938	0.974645	0.955537	0.945752	0.94565	0.921819	0.946322	0.949643	0.976341	0.974997	0.962443	0.971307	0.949643	0.976341	0.965116	0.974913	0.974997
0.3653	0.39778	0.4052	0.237523	0.372442	0.365998	0.387268	0.336348	0.319491	28	0.604401	0.630698	0.636553	0.487363	0.610281	0.604978	0.622308	0.579955	0.565236	28	0.974774	0.947132	0.982682	0.975448	0.977112	0.954061	0.972339	0.973899	0.936338	0.982743	0.968332	0.965629	0.961568	0.962202	0.972517	0.954312	0.944168	0.944149	0.91987	0.944436	0.947443	0.974993	0.973783	0.960342	0.969332	0.947443	0.974993	0.965663	0.974402	0.973783
0.36757	0.400289	0.396326	0.241448	0.380934	0.366163	0.389188	0.343674	0.315978	29	0.606275	0.632684	0.629544	0.491373	0.617198	0.605114	0.623849	0.586237	0.56212	29	0.972909	0.944555	0.981455	0.975082	0.976031	0.953367	0.972056	0.973466	0.934301	0.982223	0.967019	0.964515	0.957918	0.960684	0.971114	0.952952	0.942305	0.942215	0.915085	0.942554	0.945376	0.974142	0.973108	0.957476	0.968316	0.945376	0.974142	0.964774	0.974095	0.973108
0.36865	0.412863	0.39793	0.243174	0.385373	0.364703	0.388801	0.35394	0.331321	30	0.607166	0.642544	0.630817	0.493126	0.620784	0.603906	0.623539	0.594929	0.575605	30	0.971635	0.943075	0.980385	0.9743	0.97527	0.951704	0.971186	0.972802	0.931861	0.981492	0.965451	0.962897	0.95616	0.959041	0.969987	0.950983	0.940778	0.940651	0.912459	0.94098	0.944025	0.972739	0.97175	0.955657	0.966853	0.944025	0.972739	0.963422	0.973276	0.97175
0.364883	0.395286	0.402733	0.244901	0.372809	0.348954	0.370493	0.344334	0.319898	31	0.604055	0.628718	0.634612	0.494875	0.610581	0.590723	0.608682	0.5868	0.565595	31	0.971169	0.941541	0.979736	0.973398	0.974484	0.949477	0.969679	0.971515	0.930378	0.981003	0.964032	0.961783	0.954194	0.956748	0.9686	0.949552	0.939372	0.939164	0.908938	0.938419	0.941786	0.9714	0.970633	0.953605	0.965132	0.941786	0.9714	0.960783	0.970815	0.970633
0.362603	0.38592	0.403651	0.231671	0.366117	0.347681	0.379582	0.331802	0.308083	32	0.602166	0.621224	0.635335	0.481322	0.605076	0.589645	0.616102	0.576023	0.555052	32	0.970036	0.939773	0.979361	0.972332	0.974215	0.94867	0.968794	0.970689	0.92768	0.980185	0.962873	0.96094	0.95362	0.954981	0.967359	0.947767	0.937252	0.938311	0.907346	0.936387	0.939991	0.970568	0.971094	0.953732	0.964009	0.939991	0.970568	0.960021	0.969655	0.971094
0.37038	0.399216	0.398256	0.234623	0.371618	0.354601	0.388668	0.337672	0.31844	33	0.608588	0.631836	0.631076	0.484379	0.609604	0.595484	0.623432	0.581096	0.564305	33	0.969093	0.937608	0.97862	0.971514	0.97376	0.946753	0.967598	0.969907	0.925474	0.979565	0.961687	0.960044	0.95205	0.953249	0.966469	0.946138	0.93543	0.937438	0.904388	0.934045	0.93874	0.969527	0.970607	0.952291	0.962369	0.93874	0.969527	0.958294	0.968629	0.970607
0.36629	0.377382	0.397651	0.230901	0.358247	0.350691	0.379435	0.343065	0.315972	34	0.605219	0.614314	0.630596	0.480521	0.598537	0.592192	0.615983	0.585718	0.562114	34	0.967216	0.935105	0.977623	0.970566	0.973125	0.944284	0.966486	0.9688	0.921908	0.978701	0.960259	0.958161	0.949409	0.950709	0.964479	0.943854	0.933028	0.935357	0.900386	0.931642	0.936437	0.968372	0.969232	0.950217	0.960497	0.936437	0.968372	0.956886	0.967218	0.969232
0.354561	0.374568	0.387031	0.225612	0.350639	0.33698	0.353102	0.321153	0.297565	35	0.595451	0.61202	0.622118	0.474986	0.592148	0.5805	0.594224	0.566704	0.545495	35	0.966642	0.932463	0.976824	0.970748	0.97264	0.941816	0.965034	0.967653	0.92046	0.978352	0.959461	0.956798	0.947173	0.950022	0.963673	0.941981	0.932101	0.933419	0.895917	0.929114	0.934173	0.968124	0.968341	0.947907	0.95918	0.934173	0.968124	0.955754	0.96744	0.968341
0.34579	0.375879	0.412332	0.220615	0.371593	0.343579	0.367129	0.325481	0.301406	36	0.588039	0.61309	0.642131	0.469696	0.609585	0.586156	0.605912	0.570509	0.549004	36	0.965248	0.927433	0.975768	0.969708	0.972241	0.941919	0.964051	0.96658	0.918076	0.977821	0.958904	0.956196	0.947094	0.94878	0.962837	0.938732	0.931215	0.931727	0.894494	0.926048	0.931619	0.967766	0.968265	0.948508	0.958275	0.931619	0.967766	0.955286	0.966607	0.968265
0.335086	0.363998	0.371467	0.212802	0.361853	0.35046	0.372089	0.342667	0.316294	37	0.578866	0.603323	0.609481	0.461305	0.601542	0.591997	0.609991	0.585378	0.5624	37	0.964409	0.927527	0.975136	0.968339	0.971622	0.940202	0.963038	0.965595	0.91766	0.977236	0.957277	0.955221	0.945483	0.947326	0.961722	0.93937	0.93042	0.932676	0.892106	0.924832	0.930611	0.966775	0.967588	0.946684	0.956891	0.930611	0.966775	0.952421	0.964329	0.967588
0.328943	0.360882	0.364126	0.192715	0.356552	0.335527	0.354793	0.325555	0.297661	38	0.573535	0.600735	0.603429	0.438993	0.59712	0.579247	0.595645	0.570574	0.545583	38	0.963413	0.926167	0.974112	0.967981	0.969019	0.93904	0.964552	0.966464	0.915453	0.976594	0.95646	0.953086	0.944547	0.94831	0.962421	0.937088	0.929593	0.927916	0.890099	0.925772	0.931184	0.965551	0.965869	0.945047	0.957133	0.931184	0.965551	0.950492	0.963528	0.965869
0.329332	0.369268	0.373954	0.21313	0.347453	0.346966	0.36897	0.314744	0.294569	39	0.573874	0.607674	0.611518	0.46166	0.589451	0.589038	0.607429	0.56102	0.542742	39	0.963284	0.924441	0.974593	0.96731	0.967643	0.938134	0.96415	0.966259	0.914381	0.977439	0.955882	0.951992	0.943885	0.94784	0.962282	0.93642	0.930177	0.927758	0.889215	0.927206	0.932008	0.967671	0.966728	0.945719	0.960189	0.932008	0.967671	0.949978	0.962476	0.966728
0.366619	0.373576	0.378203	0.225896	0.365048	0.343879	0.344873	0.314894	0.280518	40	0.605491	0.611208	0.614982	0.475285	0.604192	0.586412	0.587259	0.561154	0.52964	40	0.962936	0.923238	0.974429	0.965582	0.968226	0.937515	0.963842	0.966128	0.912748	0.976872	0.95342	0.950814	0.942107	0.946484	0.961198	0.935259	0.926438	0.926938	0.88778	0.925848	0.931148	0.965456	0.966097	0.944151	0.959189	0.931148	0.965456	0.945542	0.960175	0.966097
0.305461	0.353407	0.361038	0.192993	0.341931	0.317249	0.362396	0.30496	0.282579	41	0.552686	0.594481	0.600864	0.43931	0.584748	0.563248	0.601994	0.552231	0.531581	41	0.96268	0.921196	0.973429	0.964246	0.967896	0.942158	0.964358	0.968757	0.910349	0.976383	0.951946	0.948996	0.94212	0.944598	0.960291	0.933555	0.923726	0.923326	0.883966	0.921795	0.92714	0.963918	0.96473	0.945771	0.958001	0.92714	0.963918	0.947417	0.959159	0.96473
0.329082	0.360403	0.359391	0.20387	0.354739	0.324451	0.362532	0.300088	0.279829	42	0.573656	0.600336	0.599493	0.451519	0.5956	0.569606	0.602107	0.547803	0.528989	42	0.962638	0.920533	0.972058	0.966044	0.968078	0.944211	0.965769	0.97051	0.909898	0.97639	0.950475	0.94751	0.942067	0.943667	0.959926	0.933149	0.922984	0.921971	0.884346	0.921505	0.927319	0.962832	0.962753	0.947318	0.957704	0.927319	0.962832	0.945057	0.957943	0.962753
0.315508	0.358525	0.373747	0.206518	0.344943	0.325197	0.356374	0.301778	0.282582	43	0.561701	0.598769	0.611349	0.454443	0.587318	0.570261	0.596971	0.549343	0.531584	43	0.961056	0.918972	0.970681	0.965432	0.967499	0.942734	0.962629	0.968194	0.909145	0.975769	0.949366	0.946164	0.94048	0.941707	0.958543	0.932668	0.924371	0.920698	0.884126	0.9203	0.92691	0.962486	0.961699	0.946184	0.956141	0.92691	0.962486	0.942812	0.9571	0.961699
0.343623	0.364426	0.377656	0.219161	0.344249	0.340533	0.359785	0.311963	0.283639	44	0.586194	0.603677	0.614537	0.468146	0.586727	0.583552	0.599821	0.558537	0.532577	44	0.961092	0.917087	0.97116	0.966295	0.967245	0.942521	0.962243	0.968569	0.904915	0.975226	0.948064	0.94529	0.938051	0.939697	0.956798	0.929354	0.921052	0.916473	0.879811	0.917609	0.924129	0.961431	0.960931	0.943995	0.954682	0.924129	0.961431	0.940528	0.95594	0.960931
0.323506	0.331269	0.368612	0.178024	0.330779	0.324979	0.327136	0.299309	0.266243	45	0.568776	0.57556	0.607135	0.421929	0.575134	0.570069	0.571958	0.547092	0.515987	45	0.959701	0.913788	0.969749	0.963979	0.965609	0.939754	0.96065	0.967325	0.901527	0.974658	0.94564	0.943079	0.935357	0.937549	0.955286	0.926699	0.917643	0.912991	0.874706	0.914557	0.921424	0.959385	0.958914	0.941251	0.952917	0.921424	0.959385	0.936352	0.953895	0.958914
0.33269	0.34556	0.372396	0.203277	0.336188	0.315699	0.337101	0.313272	0.275938	46	0.576793	0.587844	0.610242	0.450863	0.579817	0.561871	0.580604	0.559707	0.525298	46	0.960892	0.912252	0.971785	0.963402	0.964626	0.939588	0.959825	0.966919	0.901352	0.974601	0.946381	0.944828	0.934668	0.937874	0.955733	0.927711	0.916242	0.910184	0.872414	0.91369	0.920381	0.960962	0.961569	0.940548	0.954302	0.920381	0.960962	0.935884	0.953029	0.961569
0.328836	0.363441	0.358766	0.216388	0.333927	0.330601	0.34847	0.29548	0.272578	47	0.573442	0.602861	0.598971	0.465176	0.577864	0.574979	0.590313	0.543581	0.52209	47	0.961571	0.910082	0.971085	0.962598	0.964978	0.940289	0.957723	0.965556	0.900891	0.974781	0.946402	0.944562	0.934211	0.938668	0.955576	0.925909	0.914676	0.909747	0.871693	0.91136	0.918605	0.959801	0.961046	0.940634	0.951997	0.918605	0.959801	0.935737	0.952385	0.961046
0.32941	0.361685	0.35642	0.200002	0.342262	0.316477	0.342875	0.280402	0.257774	48	0.573943	0.601403	0.597009	0.447216	0.585032	0.562563	0.585555	0.52953	0.507714	48	0.959812	0.908582	0.970197	0.961334	0.963543	0.938124	0.952462	0.962586	0.899738	0.973993	0.944753	0.942262	0.932014	0.934889	0.953528	0.927333	0.913227	0.908794	0.869207	0.907744	0.916711	0.959555	0.959643	0.939377	0.950017	0.916711	0.959555	0.933752	0.948527	0.959643
0.311433	0.325724	0.382583	0.193279	0.323924	0.320703	0.339114	0.298996	0.271943	49	0.558062	0.570723	0.618533	0.439635	0.569143	0.566306	0.582335	0.546805	0.521481	49	0.958379	0.906862	0.969326	0.959442	0.963426	0.937092	0.954364	0.963167	0.897154	0.973072	0.941647	0.942	0.930897	0.936386	0.953746	0.92581	0.912746	0.905536	0.865865	0.905959	0.914678	0.958076	0.958942	0.938111	0.951075	0.914678	0.958076	0.93222	0.950839	0.958942
0.321624	0.345714	0.353984	0.187505	0.326419	0.325888	0.349488	0.305653	0.271935	50	0.567119	0.587974	0.594966	0.433018	0.571331	0.570866	0.591175	0.552859	0.521474	50	0.958861	0.905999	0.968525	0.958468	0.962541	0.934309	0.953696	0.962785	0.903145	0.974936	0.94247	0.943955	0.931013	0.938654	0.956338	0.924536	0.911522	0.902302	0.86234	0.90203	0.91111	0.956915	0.957632	0.935785	0.949557	0.91111	0.956915	0.92965	0.949645	0.957632
0.31191	0.335188	0.361766	0.188328	0.316793	0.313525	0.347631	0.300099	0.272351	51	0.558489	0.578954	0.60147	0.433968	0.562844	0.559933	0.589602	0.547813	0.521872	51	0.957277	0.9049	0.968337	0.957256	0.960864	0.930946	0.952077	0.961337	0.900773	0.973873	0.93982	0.940857	0.925953	0.937127	0.953972	0.923338	0.910269	0.901487	0.860001	0.901821	0.910298	0.956099	0.957313	0.93403	0.949828	0.910298	0.956099	0.927575	0.948481	0.957313
0.320222	0.362391	0.36665	0.202037	0.323509	0.316642	0.351739	0.294217	0.270366	52	0.565882	0.601989	0.605516	0.449486	0.568778	0.56271	0.593076	0.542418	0.519968	52	0.95629	0.901201	0.967595	0.956729	0.959961	0.927598	0.951574	0.960845	0.89874	0.973435	0.938298	0.938753	0.925252	0.937213	0.954529	0.920688	0.907217	0.896599	0.854258	0.897532	0.906612	0.955288	0.955883	0.931596	0.949292	0.906612	0.955288	0.924953	0.948913	0.955883
0.300894	0.328984	0.340989	0.182932	0.314462	0.308347	0.321401	0.284125	0.250671	53	0.548538	0.573571	0.583943	0.427706	0.560769	0.55529	0.566923	0.533033	0.500671	53	0.954392	0.898224	0.966716	0.955683	0.958022	0.921937	0.94991	0.959309	0.892656	0.971222	0.937231	0.936993	0.919963	0.933168	0.952576	0.918498	0.903884	0.890832	0.842054	0.89624	0.902012	0.954433	0.953587	0.924516	0.948081	0.902012	0.954433	0.921473	0.946637	0.953587
0.313366	0.346886	0.338706	0.191436	0.328607	0.323917	0.331716	0.283982	0.255531	54	0.559791	0.58897	0.581985	0.437534	0.573243	0.569137	0.575948	0.5329	0.5055	54	0.953785	0.896985	0.966117	0.953641	0.957341	0.92132	0.949156	0.958642	0.890785	0.970818	0.935287	0.936296	0.919109	0.932502	0.951994	0.918742	0.898256	0.889616	0.842417	0.895571	0.902066	0.951385	0.952389	0.924449	0.946904	0.902066	0.951385	0.918627	0.944266	0.952389
0.294917	0.330239	0.369415	0.182618	0.319478	0.321527	0.316707	0.277435	0.243798	55	0.543062	0.574665	0.607795	0.427338	0.565224	0.567033	0.562768	0.526721	0.493759	55	0.952092	0.899005	0.965035	0.951964	0.955639	0.919316	0.947896	0.957558	0.89326	0.969597	0.932679	0.932768	0.917056	0.930449	0.950522	0.9213	0.901724	0.893161	0.842285	0.896305	0.903275	0.949465	0.950673	0.922524	0.945725	0.903275	0.949465	0.916744	0.942738	0.950673
0.303788	0.337846	0.352273	0.188965	0.304367	0.308642	0.331932	0.282844	0.249292	56	0.55117	0.581245	0.593526	0.434701	0.551695	0.555556	0.576136	0.531831	0.499292	56	0.952177	0.901273	0.965431	0.952802	0.959206	0.917857	0.945482	0.955579	0.894206	0.969656	0.932572	0.934944	0.914733	0.92622	0.947068	0.921207	0.899653	0.889068	0.843937	0.893631	0.902094	0.94891	0.951557	0.921551	0.942416	0.902094	0.94891	0.917139	0.940187	0.951557
0.310738	0.336212	0.351059	0.180967	0.304873	0.295206	0.316323	0.275806	0.242495	57	0.557438	0.579838	0.592503	0.425402	0.552153	0.543329	0.562426	0.525173	0.492438	57	0.950976	0.898792	0.964735	0.951788	0.957151	0.915335	0.944152	0.954529	0.89142	0.968764	0.931411	0.93187	0.911852	0.924145	0.945727	0.919086	0.897263	0.885126	0.839408	0.89079	0.899622	0.949489	0.948022	0.919662	0.940839	0.899622	0.949489	0.917477	0.939813	0.948022
0.297042	0.332435	0.330998	0.176175	0.297601	0.296212	0.326428	0.283793	0.250133	58	0.545015	0.576572	0.575324	0.419732	0.545528	0.544253	0.571339	0.532723	0.500133	58	0.949888	0.892623	0.96425	0.95032	0.957587	0.917166	0.94362	0.954449	0.885243	0.968157	0.928961	0.931271	0.91259	0.922943	0.945	0.913609	0.894178	0.87729	0.83521	0.884433	0.894734	0.94719	0.947536	0.92021	0.939963	0.894734	0.94719	0.915846	0.936977	0.947536
0.280159	0.320456	0.348634	0.167903	0.292506	0.273594	0.31185	0.250217	0.222422	59	0.5293	0.566088	0.590453	0.409759	0.540838	0.523062	0.558435	0.500217	0.471616	59	0.946846	0.892253	0.962241	0.949648	0.956058	0.914605	0.941134	0.952958	0.880732	0.966942	0.927108	0.928427	0.907734	0.91492	0.94013	0.909799	0.891736	0.874746	0.834926	0.889263	0.897451	0.945845	0.945566	0.916417	0.934303	0.897451	0.945845	0.914336	0.936044	0.945566
0.287372	0.331435	0.32671	0.170462	0.294829	0.284916	0.30927	0.260852	0.230979	60	0.536071	0.575704	0.571586	0.41287	0.542981	0.533776	0.556121	0.510736	0.480603	60	0.946304	0.891637	0.961729	0.948433	0.956272	0.91353	0.941084	0.952132	0.877618	0.966193	0.924981	0.929691	0.906053	0.915355	0.939039	0.907815	0.890392	0.876934	0.832846	0.891264	0.897274	0.943626	0.946607	0.91463	0.934476	0.897274	0.943626	0.913554	0.936078	0.946607
0.283313	0.328849	0.350513	0.166806	0.304472	0.28376	0.321058	0.256045	0.230214	61	0.532272	0.573454	0.592041	0.408418	0.55179	0.532691	0.56662	0.506009	0.479806	61	0.946314	0.893089	0.961195	0.947719	0.956074	0.913616	0.940619	0.951476	0.882605	0.965889	0.924757	0.930658	0.908122	0.915662	0.938762	0.909245	0.89026	0.878027	0.834317	0.891984	0.897926	0.942994	0.946335	0.914744	0.93395	0.897926	0.942994	0.912932	0.935336	0.946335
0.288273	0.3257	0.330106	0.176837	0.303211	0.294424	0.332312	0.265315	0.240102	62	0.53691	0.570702	0.574549	0.42052	0.550646	0.542609	0.576465	0.515087	0.490002	62	0.945372	0.890342	0.960485	0.947738	0.956007	0.910981	0.940676	0.951309	0.877906	0.965801	0.92187	0.930041	0.905372	0.914163	0.936847	0.907295	0.885724	0.875683	0.828921	0.889192	0.894366	0.942254	0.945702	0.912696	0.932691	0.894366	0.942254	0.909703	0.935922	0.945702
0.292804	0.330562	0.347257	0.179147	0.304761	0.301135	0.328813	0.270066	0.237996	63	0.541114	0.574945	0.589285	0.423257	0.552052	0.548758	0.573422	0.519679	0.487849	63	0.944262	0.890783	0.960233	0.94694	0.95447	0.907722	0.939523	0.950646	0.880404	0.964201	0.920179	0.929348	0.897459	0.913847	0.935412	0.909391	0.887006	0.877666	0.826932	0.890476	0.89626	0.940942	0.943527	0.9074	0.931547	0.89626	0.940942	0.904804	0.935003	0.943527
0.274429	0.310694	0.334072	0.164854	0.298395	0.28834	0.321552	0.268776	0.237281	64	0.523859	0.557399	0.577989	0.406022	0.546256	0.536973	0.567055	0.518436	0.487115	64	0.943034	0.888513	0.959627	0.943972	0.952882	0.905402	0.938364	0.949649	0.876537	0.962813	0.916704	0.925556	0.892603	0.911741	0.933822	0.906746	0.880548	0.875946	0.824315	0.88856	0.894112	0.937945	0.940676	0.903422	0.930185	0.894112	0.937945	0.897398	0.931365	0.940676
0.299304	0.327085	0.344156	0.177872	0.311854	0.295653	0.335411	0.282471	0.25425	65	0.547087	0.571913	0.586648	0.421749	0.558439	0.54374	0.579147	0.53148	0.504232	65	0.943747	0.88637	0.960383	0.944281	0.953954	0.905515	0.938824	0.950827	0.873319	0.962727	0.915301	0.925703	0.890269	0.910086	0.932919	0.904483	0.878759	0.873059	0.821652	0.887124	0.892882	0.936814	0.940364	0.901185	0.928768	0.892882	0.936814	0.894798	0.929833	0.940364
0.297473	0.316466	0.340428	0.168373	0.313302	0.28679	0.310663	0.26605	0.232346	66	0.545411	0.562553	0.583462	0.410332	0.559734	0.535528	0.557372	0.5158	0.482022	66	0.941347	0.88216	0.958267	0.94149	0.952407	0.8974	0.936183	0.94903	0.868061	0.959831	0.910571	0.92296	0.8792	0.905907	0.930026	0.901047	0.87431	0.868573	0.812523	0.883366	0.889744	0.933544	0.937925	0.893799	0.924978	0.889744	0.933544	0.886438	0.92593	0.937925
0.281323	0.31015	0.34318	0.167947	0.303943	0.286219	0.305859	0.268377	0.230212	67	0.530399	0.556912	0.585815	0.409813	0.55131	0.534995	0.553046	0.518052	0.479804	67	0.933826	0.87576	0.955444	0.937485	0.948952	0.893644	0.929116	0.944468	0.864605	0.957234	0.906967	0.921089	0.875233	0.904292	0.927964	0.898072	0.870632	0.865621	0.807895	0.880228	0.88682	0.931988	0.936215	0.891125	0.92185	0.88682	0.931988	0.885015	0.922763	0.936215
0.280833	0.296989	0.325157	0.15717	0.287244	0.28343	0.300477	0.261855	0.222456	68	0.529937	0.544967	0.570225	0.396446	0.535951	0.532381	0.548158	0.511718	0.471652	68	0.933174	0.874292	0.955154	0.937726	0.948417	0.893306	0.928639	0.94367	0.863147	0.957065	0.90686	0.920286	0.874624	0.90357	0.926966	0.896031	0.867494	0.86366	0.80737	0.877606	0.884751	0.930792	0.935458	0.891491	0.920447	0.884751	0.930792	0.886408	0.920994	0.935458
0.268459	0.307679	0.336476	0.164578	0.294387	0.279014	0.317475	0.263375	0.224638	69	0.51813	0.554689	0.580065	0.405682	0.542575	0.528218	0.56345	0.5132	0.47396	69	0.933957	0.87213	0.955093	0.937426	0.947481	0.885937	0.92807	0.943318	0.862063	0.957326	0.90701	0.921201	0.870176	0.904663	0.927452	0.894157	0.864635	0.862219	0.803355	0.87532	0.882384	0.930503	0.93496	0.884885	0.920376	0.882384	0.930503	0.877773	0.920842	0.93496
0.290072	0.314495	0.330904	0.171529	0.287249	0.28442	0.311968	0.26396	0.235668	70	0.538583	0.560799	0.575242	0.414161	0.535956	0.53331	0.558541	0.51377	0.485457	70	0.930227	0.870937	0.956594	0.939033	0.948005	0.888426	0.928938	0.944289	0.858094	0.954472	0.90336	0.916065	0.864668	0.9017	0.923729	0.891059	0.860765	0.859009	0.797372	0.871768	0.879176	0.92883	0.934558	0.882213	0.917996	0.879176	0.92883	0.874386	0.918354	0.934558
0.265858	0.313508	0.330341	0.14191	0.273766	0.27492	0.297383	0.257066	0.22157	71	0.515614	0.559918	0.574753	0.37671	0.523227	0.524328	0.545328	0.507016	0.470712	71	0.927084	0.868771	0.954931	0.936166	0.94695	0.885156	0.926301	0.942139	0.853806	0.952837	0.90336	0.912624	0.860838	0.897325	0.921176	0.889964	0.855781	0.856201	0.793209	0.869449	0.877599	0.927168	0.93347	0.878946	0.914842	0.877599	0.927168	0.870848	0.914324	0.93347
0.279437	0.303187	0.334812	0.165615	0.298171	0.287173	0.306872	0.259684	0.228352	72	0.528618	0.550624	0.578629	0.406959	0.54605	0.535885	0.553961	0.509592	0.477862	72	0.927734	0.866568	0.955464	0.935519	0.946503	0.883083	0.926502	0.942702	0.848374	0.9584	0.904858	0.911246	0.857913	0.893152	0.918762	0.890298	0.852861	0.852832	0.789474	0.865701	0.873811	0.927993	0.934695	0.877535	0.918165	0.873811	0.927993	0.867785	0.914136	0.934695
0.271787	0.304069	0.318174	0.157617	0.289447	0.273771	0.310725	0.248022	0.220165	73	0.521332	0.551425	0.564069	0.39701	0.538002	0.523231	0.557427	0.498018	0.469217	73	0.92657	0.86383	0.954648	0.934451	0.944357	0.877831	0.924916	0.941556	0.845157	0.958297	0.904465	0.908289	0.853691	0.89136	0.917723	0.888289	0.848962	0.851372	0.779634	0.863472	0.871751	0.925425	0.932734	0.871051	0.916121	0.871751	0.925425	0.862249	0.911346	0.932734
0.266268	0.312686	0.312335	0.154173	0.274402	0.27089	0.294316	0.251408	0.210872	74	0.516012	0.559183	0.558869	0.392648	0.523834	0.520471	0.542509	0.501406	0.459208	74	0.924735	0.865181	0.954338	0.934224	0.94378	0.873657	0.924453	0.941128	0.847263	0.957328	0.904348	0.905171	0.843652	0.889954	0.914746	0.890629	0.852502	0.851862	0.777475	0.864903	0.873834	0.924812	0.931878	0.864647	0.915646	0.873834	0.924812	0.854045	0.911059	0.931878
0.286092	0.30929	0.334705	0.166715	0.279002	0.290157	0.283134	0.248079	0.206717	75	0.534876	0.556138	0.578537	0.408307	0.528206	0.538663	0.532104	0.498075	0.454661	75	0.925235	0.867544	0.954556	0.934288	0.943789	0.874545	0.924919	0.941126	0.852826	0.956826	0.903711	0.904344	0.84384	0.887268	0.912934	0.893964	0.854812	0.854357	0.780562	0.869197	0.87667	0.925019	0.931961	0.865736	0.915162	0.87667	0.925019	0.856163	0.911841	0.931961
0.269866	0.301698	0.318684	0.156522	0.288344	0.270065	0.300753	0.242226	0.210792	76	0.519486	0.54927	0.564521	0.395629	0.536977	0.519678	0.548409	0.492165	0.459121	76	0.922911	0.862153	0.952586	0.933892	0.940462	0.884726	0.92402	0.942699	0.84682	0.955819	0.900913	0.902037	0.851005	0.886094	0.913505	0.889609	0.851255	0.846512	0.785073	0.864097	0.873524	0.924742	0.928245	0.877064	0.914615	0.873524	0.924742	0.858923	0.908177	0.928245
0.274763	0.297182	0.338159	0.148203	0.276582	0.271526	0.297999	0.241514	0.204064	77	0.524178	0.545144	0.581514	0.384972	0.52591	0.521081	0.545893	0.491441	0.451734	77	0.921395	0.861341	0.951741	0.932624	0.938878	0.882436	0.923152	0.941587	0.845944	0.95489	0.898644	0.899684	0.847939	0.884727	0.911915	0.889878	0.851758	0.84427	0.783061	0.863218	0.872939	0.922188	0.926801	0.874389	0.914014	0.872939	0.922188	0.855632	0.908084	0.926801
0.274752	0.296321	0.311719	0.151234	0.281768	0.277547	0.303972	0.240513	0.209134	78	0.524168	0.544353	0.558318	0.388888	0.530818	0.526827	0.551336	0.490421	0.457311	78	0.920516	0.85683	0.951108	0.932861	0.938255	0.882346	0.924412	0.943066	0.844321	0.954518	0.897613	0.898839	0.846981	0.883497	0.910927	0.890079	0.84943	0.842374	0.780314	0.86199	0.872569	0.921004	0.926191	0.873427	0.912136	0.872569	0.921004	0.855542	0.908856	0.926191
0.264697	0.297811	0.30806	0.142761	0.274155	0.257338	0.310473	0.250332	0.219292	79	0.514488	0.545721	0.555032	0.377837	0.523598	0.507285	0.557201	0.500332	0.468286	79	0.91935	0.857201	0.950006	0.92913	0.936569	0.875821	0.922284	0.941198	0.843482	0.953777	0.895022	0.897244	0.842233	0.880972	0.909056	0.890347	0.850426	0.84283	0.779617	0.861225	0.872629	0.918492	0.924641	0.868755	0.910172	0.872629	0.918492	0.850217	0.907568	0.924641
0.26376	0.295574	0.315229	0.148105	0.277789	0.263545	0.292993	0.241263	0.209762	80	0.513576	0.543667	0.561452	0.384843	0.527057	0.513366	0.541288	0.491185	0.457998	80	0.91751	0.85944	0.947981	0.928337	0.938233	0.875649	0.920591	0.940874	0.846236	0.953791	0.893327	0.898457	0.839323	0.878468	0.907537	0.890855	0.852988	0.843808	0.786814	0.865819	0.879197	0.917414	0.923564	0.869969	0.910471	0.879197	0.917414	0.848968	0.906083	0.923564
0.272972	0.300766	0.334666	0.154269	0.286846	0.269142	0.309477	0.248434	0.206743	81	0.522467	0.548421	0.578503	0.392771	0.53558	0.518789	0.556307	0.498431	0.454691	81	0.917455	0.860879	0.947806	0.926485	0.936737	0.875884	0.920507	0.940814	0.848063	0.953863	0.890503	0.896375	0.840625	0.878405	0.907361	0.892442	0.852508	0.842415	0.789719	0.867097	0.881105	0.914109	0.920588	0.871824	0.91036	0.881105	0.914109	0.844758	0.90419	0.920588
0.262469	0.303265	0.312065	0.150337	0.266595	0.2666	0.294863	0.241894	0.210331	82	0.512317	0.550695	0.558628	0.387733	0.516328	0.516333	0.543013	0.491827	0.458619	82	0.914938	0.856295	0.946295	0.923304	0.9348	0.871378	0.91838	0.939991	0.84327	0.952447	0.886835	0.893668	0.835415	0.874934	0.905368	0.889077	0.845383	0.838289	0.780348	0.86324	0.879202	0.910706	0.918263	0.867403	0.907955	0.879202	0.910706	0.836882	0.900659	0.918263
0.27884	0.297733	0.324394	0.154315	0.273619	0.268497	0.308654	0.256476	0.219436	83	0.528053	0.545649	0.569556	0.39283	0.523086	0.518167	0.555567	0.506435	0.46844	83	0.914971	0.854909	0.9453	0.921303	0.932021	0.866771	0.915712	0.937913	0.843178	0.950842	0.884956	0.890116	0.829118	0.870876	0.901126	0.889588	0.844393	0.837268	0.778368	0.862877	0.880015	0.909754	0.916459	0.863671	0.905798	0.880015	0.909754	0.833997	0.899304	0.916459
0.266933	0.294489	0.320988	0.148252	0.266929	0.255936	0.301922	0.241816	0.204364	84	0.516656	0.542668	0.566558	0.385035	0.516652	0.505902	0.549474	0.491748	0.452066	84	0.912602	0.841685	0.942599	0.920283	0.931444	0.858351	0.911464	0.934709	0.823257	0.950345	0.883342	0.889531	0.820429	0.867644	0.899664	0.870619	0.827758	0.817511	0.76551	0.849409	0.863878	0.908465	0.916331	0.854407	0.902087	0.863878	0.908465	0.827456	0.897965	0.916331
0.270378	0.287582	0.300048	0.140417	0.274667	0.270656	0.29139	0.238976	0.199408	85	0.519979	0.536266	0.547767	0.374723	0.524087	0.520246	0.539805	0.488851	0.446551	85	0.909741	0.841456	0.942063	0.921182	0.933694	0.851075	0.902546	0.931863	0.820981	0.949058	0.882128	0.891002	0.815547	0.862851	0.897924	0.870205	0.828307	0.81936	0.75958	0.842652	0.861837	0.908897	0.918467	0.849399	0.89581	0.861837	0.908897	0.824108	0.892138	0.918467
0.27104	0.298989	0.328878	0.155417	0.273794	0.290429	0.302123	0.256567	0.216769	86	0.520615	0.546798	0.573479	0.39423	0.523253	0.538914	0.549658	0.506524	0.465585	86	0.907673	0.844931	0.941099	0.919808	0.93215	0.847313	0.900422	0.932192	0.822176	0.94825	0.877368	0.888698	0.812034	0.860164	0.895278	0.871387	0.826649	0.821463	0.760678	0.844556	0.861089	0.904442	0.91698	0.846851	0.89397	0.861089	0.904442	0.818836	0.888748	0.91698
0.253796	0.304121	0.321601	0.147968	0.274792	0.266125	0.288205	0.241962	0.206446	87	0.503782	0.551472	0.567099	0.384666	0.524206	0.515873	0.536848	0.491897	0.454364	87	0.901593	0.837276	0.935482	0.913827	0.929407	0.837601	0.894701	0.927939	0.815469	0.946917	0.8749	0.883104	0.797172	0.854787	0.891296	0.865564	0.820644	0.81227	0.745568	0.83756	0.854994	0.902817	0.910448	0.831719	0.888222	0.854994	0.902817	0.803952	0.88582	0.910448
0.242271	0.283218	0.311505	0.127881	0.258562	0.248475	0.278169	0.215264	0.186229	88	0.49221	0.532182	0.558127	0.357605	0.50849	0.498473	0.527417	0.463965	0.431542	88	0.902847	0.835156	0.934504	0.913574	0.92814	0.835883	0.88989	0.927363	0.810792	0.94416	0.871471	0.879371	0.794908	0.843541	0.886417	0.861431	0.816293	0.807277	0.741397	0.829461	0.850711	0.898833	0.907763	0.828003	0.882663	0.850711	0.898833	0.80113	0.877317	0.907763
0.249741	0.287543	0.330564	0.139063	0.258623	0.265886	0.292223	0.227111	0.200676	89	0.499741	0.53623	0.574947	0.372911	0.50855	0.515642	0.540576	0.476561	0.447969	89	0.902063	0.832519	0.932958	0.908576	0.926003	0.833745	0.889353	0.924624	0.809862	0.946784	0.870214	0.880435	0.795699	0.847396	0.886493	0.86428	0.817475	0.809098	0.743427	0.833198	0.85174	0.900844	0.909075	0.830281	0.884239	0.85174	0.900844	0.803119	0.879956	0.909075
0.251214	0.280137	0.317111	0.144155	0.255127	0.252284	0.290213	0.219858	0.189042	90	0.501213	0.52928	0.563126	0.379678	0.505101	0.502279	0.538714	0.46889	0.43479	90	0.902159	0.831301	0.93283	0.90834	0.92667	0.831796	0.88692	0.924824	0.803975	0.946629	0.870442	0.878931	0.790878	0.844746	0.884604	0.863193	0.814017	0.80147	0.733363	0.833878	0.846457	0.899983	0.908883	0.827721	0.882111	0.846457	0.899983	0.799664	0.874252	0.908883
0.258251	0.287914	0.320274	0.147098	0.265826	0.257585	0.286581	0.228186	0.195401	91	0.508184	0.536576	0.565927	0.383533	0.515583	0.507529	0.535333	0.477689	0.442042	91	0.902418	0.825869	0.931935	0.907808	0.926647	0.825171	0.88736	0.923242	0.797167	0.945267	0.868852	0.878396	0.782413	0.843957	0.881716	0.858582	0.812137	0.79837	0.724665	0.834619	0.84383	0.90097	0.909558	0.821122	0.884952	0.84383	0.90097	0.797039	0.874418	0.909558
0.254013	0.277379	0.29785	0.13867	0.261914	0.253047	0.290192	0.225126	0.19005	92	0.503997	0.526668	0.545756	0.372384	0.511775	0.503038	0.538695	0.474475	0.435947	92	0.900082	0.82112	0.930114	0.905715	0.92509	0.820646	0.88604	0.921687	0.792609	0.944148	0.865939	0.877291	0.779627	0.841562	0.879585	0.854166	0.807672	0.796002	0.720114	0.83248	0.840688	0.898842	0.908672	0.817007	0.884249	0.840688	0.898842	0.791986	0.872627	0.908672
0.245346	0.273076	0.294337	0.126751	0.263827	0.251227	0.280006	0.221172	0.189105	93	0.495324	0.522566	0.542528	0.35602	0.513641	0.501226	0.529156	0.470289	0.434862	93	0.899932	0.825899	0.928978	0.904526	0.925214	0.817801	0.88615	0.92117	0.795404	0.943972	0.865227	0.876986	0.778913	0.841259	0.879136	0.857363	0.811264	0.799865	0.727819	0.835174	0.844689	0.897433	0.90788	0.813668	0.883734	0.844689	0.897433	0.789202	0.872257	0.90788
0.23622	0.270775	0.292691	0.126748	0.249054	0.253827	0.281595	0.229534	0.19251	94	0.486025	0.52036	0.541009	0.356016	0.499054	0.503812	0.530656	0.479097	0.43876	94	0.900818	0.830064	0.930742	0.90194	0.922698	0.814089	0.883609	0.918527	0.798837	0.945715	0.86148	0.872617	0.774032	0.836714	0.874923	0.85901	0.815927	0.80176	0.729488	0.835924	0.847719	0.896358	0.90465	0.81041	0.879721	0.847719	0.896358	0.785697	0.872137	0.90465
0.262431	0.295351	0.323672	0.142604	0.263604	0.267855	0.283257	0.231634	0.190047	95	0.51228	0.543462	0.568922	0.37763	0.513423	0.517547	0.532219	0.481284	0.435944	95	0.89681	0.830026	0.92945	0.893201	0.920922	0.805352	0.882657	0.915431	0.799507	0.944977	0.862189	0.872987	0.775334	0.836887	0.876641	0.85977	0.813829	0.804864	0.729685	0.840471	0.851756	0.893167	0.905429	0.808058	0.881121	0.851756	0.893167	0.790416	0.871234	0.905429
0.244791	0.289274	0.309639	0.142797	0.267963	0.243501	0.293506	0.228957	0.194983	96	0.494763	0.537842	0.556452	0.377884	0.517652	0.493458	0.541762	0.478495	0.441569	96	0.890587	0.823334	0.927635	0.890206	0.917462	0.802783	0.880334	0.914939	0.787932	0.942038	0.857954	0.86342	0.767407	0.831423	0.874227	0.855883	0.807969	0.798435	0.726761	0.837047	0.849518	0.88989	0.902541	0.805377	0.878525	0.849518	0.88989	0.78485	0.867857	0.902541
0.245026	0.271011	0.321947	0.142038	0.265254	0.252623	0.289378	0.2299	0.195258	97	0.495001	0.520588	0.567404	0.376879	0.515028	0.502616	0.537938	0.479479	0.44188	97	0.891498	0.823505	0.927383	0.889027	0.918956	0.803169	0.879747	0.915429	0.789202	0.941356	0.850958	0.869806	0.761221	0.828942	0.873006	0.857727	0.802585	0.802868	0.725135	0.835234	0.850139	0.88162	0.907912	0.800255	0.875309	0.850139	0.88162	0.776321	0.864931	0.907912
0.249088	0.270727	0.291268	0.126744	0.248422	0.249427	0.288505	0.208831	0.177263	98	0.499087	0.520315	0.539692	0.356012	0.498419	0.499427	0.537126	0.45698	0.421026	98	0.891038	0.823358	0.927677	0.88846	0.917684	0.798553	0.878365	0.915357	0.790451	0.943541	0.850695	0.869044	0.759137	0.827171	0.873926	0.853627	0.798598	0.800088	0.710976	0.833866	0.846004	0.878465	0.906925	0.791389	0.87258	0.846004	0.878465	0.764904	0.864526	0.906925
0.24754	0.274031	0.307807	0.134883	0.262045	0.259196	0.271424	0.225383	0.189471	99	0.497534	0.52348	0.554804	0.367264	0.511904	0.509113	0.520984	0.474745	0.435282	99	0.890534	0.82779	0.92869	0.888561	0.913476	0.790986	0.882178	0.915793	0.795638	0.94412	0.851362	0.869283	0.753972	0.831637	0.87495	0.857056	0.802789	0.808306	0.712702	0.839102	0.849993	0.87933	0.907406	0.789194	0.875524	0.849993	0.87933	0.761168	0.867415	0.907406
0.252579	0.278033	0.299797	0.13252	0.253048	0.260504	0.274333	0.229837	0.188548	100	0.502572	0.527288	0.547537	0.364033	0.503038	0.510396	0.523768	0.479413	0.434222	100	0.882199	0.825353	0.927862	0.884887	0.911201	0.792865	0.879821	0.914102	0.787605	0.937084	0.830907	0.852942	0.743585	0.825385	0.868492	0.855127	0.797125	0.80402	0.712875	0.836526	0.847572	0.87554	0.905078	0.790653	0.873231	0.847572	0.87554	0.765804	0.859747	0.905078
0.250956	0.288136	0.314237	0.143246	0.253972	0.25096	0.279282	0.220425	0.183368	101	0.500955	0.536783	0.560568	0.378478	0.503956	0.500959	0.528471	0.469494	0.428215	101	0.878956	0.823789	0.927035	0.882281	0.906855	0.788873	0.875152	0.910659	0.783347	0.93571	0.825944	0.849187	0.740163	0.821115	0.865258	0.852456	0.793938	0.799545	0.70426	0.83216	0.842799	0.872314	0.902853	0.786185	0.870015	0.842799	0.872314	0.757581	0.854125	0.902853
0.246897	0.279032	0.313122	0.136512	0.249773	0.248611	0.279367	0.226956	0.187728	102	0.496887	0.528235	0.559573	0.369476	0.499773	0.498609	0.528552	0.476399	0.433275	102	0.873529	0.815838	0.924243	0.878897	0.903479	0.782621	0.871255	0.905685	0.77067	0.931453	0.824762	0.848245	0.736197	0.822164	0.864825	0.845103	0.784738	0.789764	0.691667	0.822587	0.831587	0.869386	0.900159	0.77964	0.867213	0.831587	0.869386	0.756239	0.854382	0.900159
0.259754	0.275858	0.308313	0.133269	0.253779	0.260604	0.280118	0.23375	0.190937	103	0.509661	0.525221	0.555259	0.365061	0.503764	0.510494	0.529262	0.483477	0.436964	103	0.871516	0.801918	0.922314	0.879414	0.90135	0.776729	0.870699	0.904851	0.758377	0.930098	0.824558	0.846302	0.730203	0.819935	0.862885	0.835496	0.776283	0.782448	0.680118	0.809673	0.819853	0.869419	0.899155	0.774407	0.864885	0.819853	0.869419	0.753063	0.854695	0.899155
0.241034	0.274903	0.311188	0.130307	0.267934	0.255448	0.272034	0.225331	0.193851	104	0.490952	0.524312	0.557842	0.36098	0.517624	0.505418	0.521569	0.47469	0.440285	104	0.868906	0.79671	0.921506	0.879603	0.896968	0.769098	0.864533	0.901736	0.75436	0.922411	0.822346	0.841233	0.721041	0.813733	0.860837	0.829096	0.772768	0.776002	0.670747	0.803827	0.815829	0.864109	0.89563	0.767384	0.860256	0.815829	0.864109	0.746506	0.851675	0.89563
0.241821	0.275738	0.284763	0.136101	0.256779	0.259561	0.274696	0.231018	0.187736	105	0.491753	0.525107	0.533632	0.368919	0.506734	0.509472	0.524115	0.480644	0.433285	105	0.867003	0.78245	0.921689	0.880181	0.887909	0.771302	0.863899	0.902454	0.742576	0.921268	0.819796	0.834216	0.720675	0.811166	0.858568	0.81695	0.755948	0.766155	0.658305	0.790945	0.799088	0.865302	0.88774	0.7694	0.859915	0.799088	0.865302	0.749594	0.850312	0.88774
0.245947	0.278326	0.29664	0.135167	0.244952	0.24342	0.273483	0.220689	0.185311	106	0.495931	0.527566	0.544647	0.367651	0.494926	0.493377	0.522956	0.469775	0.430478	106	0.861981	0.791852	0.920453	0.875631	0.880973	0.762855	0.856401	0.898369	0.751101	0.918612	0.814949	0.828702	0.714206	0.80488	0.854653	0.829658	0.765641	0.779156	0.661938	0.802722	0.810104	0.861124	0.881588	0.762889	0.853065	0.810104	0.861124	0.74364	0.844846	0.881588
0.232024	0.277935	0.311136	0.132715	0.243026	0.250559	0.283307	0.22128	0.182415	107	0.481689	0.527196	0.557796	0.364301	0.492977	0.500558	0.532266	0.470404	0.427101	107	0.85638	0.790849	0.916282	0.874894	0.879079	0.755027	0.853079	0.893464	0.748398	0.912917	0.811675	0.82433	0.702935	0.799247	0.846837	0.829586	0.764129	0.777523	0.658417	0.801244	0.809079	0.86175	0.881333	0.761945	0.850102	0.809079	0.86175	0.742631	0.843481	0.881333
0.237156	0.271448	0.314296	0.13484	0.251296	0.236428	0.265519	0.223384	0.18264	108	0.486986	0.521007	0.560621	0.367206	0.501295	0.486238	0.515285	0.472635	0.427364	108	0.856478	0.793672	0.916575	0.875772	0.880566	0.758903	0.853533	0.89513	0.740278	0.910537	0.812191	0.819545	0.693081	0.795223	0.842828	0.82504	0.766446	0.773447	0.652248	0.798689	0.80698	0.862498	0.878556	0.755311	0.847522	0.80698	0.862498	0.745359	0.844146	0.878556
0.226561	0.260421	0.29074	0.119094	0.246825	0.245808	0.276573	0.221707	0.176785	109	0.475984	0.510314	0.539203	0.345099	0.496815	0.49579	0.525902	0.470858	0.420458	109	0.853532	0.790229	0.915782	0.873789	0.88027	0.759075	0.847578	0.893186	0.733386	0.907415	0.809856	0.817574	0.693427	0.782832	0.838094	0.817649	0.76105	0.775591	0.654167	0.789092	0.800977	0.859496	0.881032	0.757612	0.840005	0.800977	0.859496	0.745989	0.836039	0.881032
0.248104	0.284325	0.312049	0.139354	0.243447	0.245653	0.267975	0.215835	0.180983	110	0.498101	0.533221	0.558614	0.373302	0.493403	0.495633	0.517663	0.46458	0.42542	110	0.855686	0.793353	0.916942	0.875766	0.882861	0.761585	0.851452	0.895296	0.74207	0.90987	0.8145	0.819347	0.695023	0.787392	0.842014	0.82317	0.77029	0.778603	0.658018	0.796184	0.808368	0.864	0.883847	0.76079	0.845592	0.808368	0.864	0.744217	0.837616	0.883847
0.235801	0.262029	0.304802	0.12063	0.247117	0.24523	0.268847	0.223386	0.180104	111	0.485594	0.511887	0.552089	0.347318	0.497109	0.495207	0.518504	0.472638	0.424386	111	0.849377	0.778645	0.914115	0.878152	0.882172	0.756221	0.850896	0.89297	0.724922	0.904826	0.815504	0.816819	0.690766	0.78639	0.838646	0.808187	0.758213	0.767701	0.652526	0.790998	0.799628	0.868906	0.884333	0.756394	0.846176	0.799628	0.868906	0.731343	0.833968	0.884333
0.232258	0.274393	0.277241	0.123421	0.247807	0.22912	0.282031	0.210352	0.174324	112	0.481931	0.523825	0.526537	0.351313	0.497802	0.478665	0.531066	0.458642	0.417521	112	0.846521	0.772827	0.914109	0.868403	0.878481	0.753464	0.845334	0.887625	0.726195	0.904089	0.816545	0.817745	0.691954	0.788396	0.840246	0.808641	0.758685	0.765546	0.652404	0.788586	0.798122	0.863965	0.884569	0.756164	0.846581	0.798122	0.863965	0.731285	0.835417	0.884569
0.241292	0.256449	0.309006	0.125076	0.250704	0.24749	0.264069	0.216698	0.177048	113	0.491214	0.506408	0.555883	0.353661	0.500703	0.497484	0.513877	0.465508	0.420771	113	0.847101	0.78122	0.914967	0.867655	0.880476	0.754352	0.840535	0.886598	0.743031	0.905542	0.814732	0.824561	0.684169	0.786128	0.839135	0.816215	0.769508	0.769923	0.671151	0.794518	0.808167	0.863487	0.886337	0.757683	0.842016	0.808167	0.863487	0.728303	0.832972	0.886337
0.232775	0.253631	0.297239	0.11937	0.242624	0.242405	0.27567	0.215857	0.177805	114	0.482467	0.503618	0.545196	0.345499	0.492569	0.492346	0.525043	0.464605	0.42167	114	0.848039	0.770737	0.913902	0.863795	0.8749	0.754772	0.837081	0.883792	0.739249	0.904223	0.817343	0.829205	0.682895	0.787729	0.840665	0.811401	0.759018	0.755802	0.669298	0.786865	0.800311	0.86069	0.882465	0.756615	0.839247	0.800311	0.86069	0.727408	0.830889	0.882465
0.228806	0.245093	0.31082	0.124754	0.248426	0.23621	0.261962	0.215139	0.173238	115	0.478336	0.495069	0.557512	0.353205	0.498424	0.486015	0.511822	0.463831	0.416219	115	0.847702	0.766245	0.913721	0.85977	0.872234	0.748682	0.833367	0.881252	0.741965	0.903075	0.820247	0.82941	0.68224	0.786129	0.842867	0.809939	0.758459	0.750988	0.661464	0.781425	0.796846	0.858217	0.882159	0.754655	0.837812	0.796846	0.858217	0.72125	0.825199	0.882159
0.234139	0.266627	0.295418	0.130031	0.241645	0.249881	0.285276	0.210764	0.180089	116	0.483879	0.516359	0.543523	0.360598	0.491574	0.499881	0.534112	0.45909	0.424369	116	0.856849	0.769163	0.913832	0.86059	0.873885	0.746638	0.835386	0.882941	0.763139	0.910443	0.830965	0.837573	0.683233	0.798048	0.853459	0.809826	0.755414	0.754039	0.665082	0.780891	0.797118	0.857572	0.882821	0.754455	0.837582	0.797118	0.857572	0.721241	0.824825	0.882821
0.240238	0.277779	0.294516	0.126161	0.251711	0.236764	0.270806	0.216311	0.173556	117	0.490141	0.527047	0.542693	0.355191	0.501708	0.486584	0.52039	0.465092	0.4166	117	0.854334	0.765247	0.91175	0.859201	0.871448	0.740741	0.83241	0.880051	0.75938	0.907869	0.830479	0.835192	0.67896	0.793736	0.849666	0.806132	0.752624	0.749637	0.658419	0.777292	0.79315	0.855594	0.877883	0.741803	0.835618	0.79315	0.855594	0.723383	0.820752	0.877883
0.231837	0.262074	0.296707	0.126381	0.239808	0.241446	0.269984	0.222064	0.179721	118	0.481495	0.511931	0.544708	0.355501	0.489702	0.491372	0.5196	0.471236	0.423935	118	0.838407	0.76127	0.906391	0.853373	0.870698	0.726949	0.815193	0.871967	0.748295	0.903379	0.818872	0.827562	0.665929	0.785422	0.844434	0.800741	0.747307	0.746249	0.647056	0.763977	0.785849	0.850207	0.874475	0.732744	0.826839	0.785849	0.850207	0.712136	0.808536	0.874475
0.241453	0.263911	0.314389	0.123894	0.24525	0.241695	0.267927	0.219767	0.180523	119	0.491378	0.513723	0.560704	0.351986	0.495227	0.491625	0.517617	0.468793	0.42488	119	0.836817	0.75822	0.904964	0.853019	0.867972	0.723779	0.812643	0.870448	0.74654	0.904074	0.82069	0.83004	0.672509	0.785129	0.844387	0.798002	0.746572	0.743089	0.644085	0.760052	0.782422	0.851555	0.874131	0.733626	0.823935	0.782422	0.851555	0.71543	0.809846	0.874131
0.220703	0.254644	0.282933	0.122202	0.244103	0.229478	0.277785	0.207961	0.167331	120	0.46979	0.504623	0.531914	0.349574	0.494068	0.479038	0.527053	0.456028	0.409061	120	0.834268	0.740424	0.903896	0.85092	0.864255	0.715986	0.806042	0.864259	0.73971	0.901811	0.817745	0.826257	0.664768	0.781045	0.840401	0.789887	0.736346	0.733739	0.634395	0.74522	0.762275	0.851	0.869631	0.724757	0.821383	0.762275	0.851	0.706649	0.807117	0.869631
0.233722	0.256678	0.295744	0.129887	0.250968	0.247423	0.261738	0.21843	0.174062	121	0.483448	0.506634	0.543824	0.360398	0.500967	0.497417	0.511603	0.467365	0.417207	121	0.837752	0.747046	0.906608	0.854202	0.866984	0.72351	0.807732	0.866164	0.749243	0.90463	0.821233	0.83134	0.672407	0.78259	0.842172	0.79769	0.743724	0.747319	0.651007	0.746007	0.764965	0.851553	0.873587	0.725659	0.821349	0.764965	0.851553	0.705376	0.807228	0.873587
0.234299	0.257238	0.295929	0.122004	0.255994	0.23915	0.282716	0.213562	0.173859	122	0.484045	0.507186	0.543993	0.349291	0.505959	0.48903	0.53171	0.462128	0.416964	122	0.838838	0.737835	0.904798	0.851413	0.863624	0.723427	0.803182	0.862873	0.740491	0.909397	0.825182	0.832212	0.672335	0.783327	0.84078	0.787537	0.732334	0.737962	0.646452	0.736636	0.757107	0.848788	0.868704	0.726827	0.815793	0.757107	0.848788	0.705574	0.801983	0.868704
0.234629	0.256157	0.298358	0.124019	0.248816	0.230558	0.2574	0.211149	0.168384	123	0.484385	0.506119	0.546222	0.352163	0.498815	0.480165	0.507346	0.459509	0.410346	123	0.836447	0.72505	0.902145	0.8394	0.858128	0.708325	0.794539	0.857426	0.728	0.906923	0.821547	0.826455	0.663819	0.77845	0.837141	0.7808	0.69929	0.734974	0.643382	0.716054	0.750188	0.836995	0.865772	0.720491	0.807568	0.750188	0.836995	0.667512	0.792335	0.865772
0.227581	0.261422	0.295821	0.118644	0.238792	0.237665	0.257834	0.207538	0.166381	124	0.477054	0.511294	0.543894	0.344447	0.488663	0.487509	0.507774	0.455564	0.407898	124	0.836387	0.70892	0.899082	0.834147	0.859403	0.71071	0.790563	0.85519	0.720243	0.905788	0.821179	0.825333	0.663324	0.776425	0.835628	0.763675	0.680819	0.725268	0.639328	0.700414	0.736326	0.833628	0.866835	0.721472	0.805773	0.736326	0.833628	0.669439	0.789187	0.866835
0.218737	0.251626	0.281934	0.115714	0.229496	0.228413	0.245231	0.196545	0.152492	125	0.467693	0.501624	0.530974	0.340167	0.479058	0.477925	0.495208	0.443334	0.390503	125	0.833507	0.701885	0.898418	0.832605	0.856617	0.713709	0.788974	0.853731	0.713719	0.904427	0.818116	0.821961	0.664178	0.773568	0.832094	0.759572	0.674041	0.71805	0.639506	0.69509	0.730179	0.832882	0.865049	0.724216	0.804928	0.730179	0.832882	0.673849	0.788475	0.865049
0.236345	0.249578	0.293438	0.114677	0.240709	0.242781	0.272907	0.220075	0.174418	126	0.486153	0.499577	0.541699	0.33864	0.490621	0.492728	0.522405	0.469121	0.417634	126	0.837066	0.704427	0.899244	0.832307	0.85902	0.717424	0.797432	0.855768	0.716468	0.905788	0.819157	0.824919	0.670127	0.78033	0.835214	0.761673	0.676159	0.720605	0.645412	0.698976	0.73347	0.833684	0.866563	0.731624	0.80996	0.73347	0.833684	0.680824	0.790594	0.866563
0.214655	0.255294	0.29327	0.113727	0.219195	0.225984	0.257232	0.215814	0.171984	127	0.463309	0.505266	0.541544	0.337234	0.468183	0.475377	0.507181	0.464558	0.41471	127	0.842949	0.678747	0.901612	0.819268	0.8531	0.697247	0.784036	0.851004	0.706515	0.905626	0.816101	0.828922	0.666488	0.784268	0.839523	0.752179	0.663306	0.701888	0.628802	0.681978	0.713078	0.830017	0.868135	0.727172	0.811485	0.713078	0.830017	0.667835	0.781957	0.868135
0.230099	0.266715	0.295387	0.128023	0.231683	0.231333	0.252549	0.199219	0.154991	128	0.479686	0.516445	0.543495	0.357803	0.481334	0.480971	0.502542	0.44634	0.393689	128	0.839497	0.676965	0.900752	0.819855	0.851876	0.695697	0.784068	0.851862	0.704301	0.904137	0.818144	0.827947	0.665551	0.786008	0.840476	0.751175	0.668921	0.700545	0.627593	0.673547	0.705923	0.831946	0.867624	0.726357	0.812481	0.705923	0.831946	0.669375	0.791613	0.867624
0.212024	0.261861	0.294312	0.119628	0.226891	0.233017	0.241296	0.195808	0.156719	129	0.460461	0.511724	0.542505	0.345872	0.476331	0.482719	0.491219	0.442502	0.395877	129	0.831244	0.673867	0.897838	0.822164	0.851849	0.708789	0.788277	0.858391	0.691044	0.899512	0.815464	0.824065	0.669916	0.786609	0.841877	0.743363	0.671974	0.699857	0.643565	0.678255	0.714245	0.835013	0.868766	0.739879	0.818992	0.714245	0.835013	0.678224	0.793722	0.868766
0.229426	0.270309	0.290523	0.130275	0.239514	0.23822	0.269325	0.210542	0.169276	130	0.478984	0.519912	0.539002	0.360937	0.489402	0.488077	0.518965	0.458849	0.411432	130	0.829286	0.669128	0.89777	0.82268	0.852185	0.721074	0.790446	0.858405	0.678533	0.896102	0.813993	0.818588	0.686373	0.786819	0.840514	0.733366	0.666995	0.689008	0.660834	0.676306	0.709716	0.834606	0.865276	0.757431	0.820489	0.709716	0.834606	0.689928	0.794748	0.865276
0.223164	0.256618	0.284543	0.119071	0.226319	0.228009	0.269534	0.215579	0.174288	131	0.472402	0.506575	0.533426	0.345066	0.47573	0.477503	0.519166	0.464305	0.417478	131	0.821846	0.663463	0.89582	0.817107	0.845156	0.709375	0.782235	0.853819	0.666925	0.889321	0.808011	0.8103	0.67198	0.778169	0.834486	0.728092	0.657994	0.676639	0.647273	0.664845	0.702047	0.830745	0.858963	0.745545	0.813474	0.702047	0.830745	0.679241	0.788164	0.858963
0.220847	0.259715	0.285229	0.114685	0.239417	0.226298	0.261301	0.200952	0.161723	132	0.469944	0.509622	0.534068	0.338651	0.489302	0.475708	0.511176	0.448276	0.402149	132	0.819263	0.667176	0.895497	0.821519	0.846205	0.698497	0.780026	0.854999	0.665975	0.887545	0.809039	0.80914	0.662456	0.77474	0.832107	0.729707	0.66426	0.679673	0.639529	0.665049	0.705589	0.83484	0.859722	0.735107	0.809809	0.705589	0.83484	0.675469	0.794254	0.859722
0.227512	0.258194	0.287106	0.117091	0.24165	0.231218	0.255037	0.215814	0.164419	133	0.476982	0.508128	0.535822	0.342186	0.491579	0.480851	0.505012	0.464558	0.405486	133	0.819724	0.670903	0.895373	0.819447	0.847307	0.700516	0.777325	0.852997	0.673029	0.886797	0.803994	0.81128	0.666092	0.770185	0.827873	0.730483	0.661412	0.68425	0.646404	0.660481	0.702063	0.833267	0.860207	0.735792	0.807717	0.702063	0.833267	0.672907	0.79225	0.860207
0.223059	0.26424	0.287891	0.121391	0.237447	0.226129	0.261325	0.198822	0.159669	134	0.472292	0.514043	0.536554	0.348413	0.487285	0.47553	0.511199	0.445895	0.399586	134	0.811377	0.66141	0.890743	0.808446	0.842627	0.699651	0.765141	0.847565	0.666859	0.884738	0.800956	0.80394	0.66578	0.765521	0.823673	0.725431	0.654163	0.676447	0.644975	0.652716	0.695958	0.829822	0.855157	0.735952	0.804189	0.695958	0.829822	0.673107	0.786378	0.855157
0.221268	0.243716	0.280574	0.112401	0.227488	0.228967	0.26348	0.198234	0.159801	135	0.470391	0.493676	0.529692	0.335263	0.476957	0.478505	0.513303	0.445235	0.399752	135	0.8075	0.656444	0.888764	0.803838	0.841936	0.691269	0.761796	0.845516	0.661368	0.88072	0.794718	0.804828	0.654881	0.762842	0.821932	0.720565	0.647043	0.675235	0.635443	0.647699	0.692176	0.824692	0.856248	0.727754	0.802734	0.692176	0.824692	0.664463	0.78379	0.856248
0.230379	0.250372	0.270156	0.117255	0.223805	0.226571	0.257744	0.204056	0.161572	136	0.479979	0.500372	0.519765	0.342426	0.47308	0.475995	0.507685	0.451725	0.40196	136	0.809652	0.654278	0.887848	0.803438	0.834876	0.687336	0.760443	0.843772	0.661434	0.881416	0.796657	0.799932	0.657992	0.763281	0.82361	0.719005	0.645813	0.669658	0.633319	0.646065	0.690434	0.823932	0.851114	0.725329	0.801625	0.690434	0.823932	0.664487	0.783037	0.851114
0.21736	0.248152	0.269706	0.108619	0.210896	0.222824	0.259428	0.201421	0.161888	137	0.466218	0.498148	0.519332	0.329574	0.459234	0.472042	0.509341	0.4488	0.402353	137	0.809728	0.672714	0.885273	0.808411	0.834944	0.688007	0.755344	0.841678	0.67216	0.881704	0.797338	0.798882	0.662948	0.761724	0.823022	0.732744	0.652938	0.678757	0.643404	0.657151	0.701781	0.82615	0.850079	0.726846	0.798283	0.701781	0.82615	0.66659	0.783899	0.850079
0.225083	0.261877	0.282233	0.125307	0.234613	0.253258	0.264597	0.209705	0.166983	138	0.474429	0.511739	0.531256	0.353988	0.484369	0.503247	0.51439	0.457935	0.408635	138	0.808593	0.678016	0.885694	0.81669	0.834345	0.683919	0.752911	0.839573	0.675599	0.882123	0.80396	0.798938	0.659982	0.761451	0.822774	0.734798	0.654248	0.681669	0.647964	0.661188	0.708398	0.831059	0.850644	0.725605	0.799376	0.708398	0.831059	0.673281	0.792687	0.850644
0.202358	0.238809	0.28473	0.105849	0.225822	0.225817	0.251155	0.200279	0.155308	139	0.449842	0.488681	0.533601	0.325345	0.475208	0.475202	0.501153	0.447526	0.394091	139	0.799338	0.671793	0.880235	0.810478	0.828107	0.671846	0.741073	0.831175	0.669414	0.875582	0.797101	0.787997	0.646359	0.749135	0.813061	0.73342	0.647437	0.68243	0.640161	0.654352	0.702145	0.825844	0.835074	0.711962	0.785929	0.702145	0.825844	0.666782	0.787578	0.835074
0.21775	0.24857	0.277229	0.11144	0.242701	0.22296	0.244627	0.198909	0.15202	140	0.466637	0.498567	0.526526	0.333827	0.492647	0.472187	0.494598	0.445992	0.389898	140	0.799974	0.676288	0.8799	0.813987	0.834229	0.6739	0.745764	0.835291	0.669108	0.874979	0.795329	0.788374	0.646112	0.749625	0.813402	0.731304	0.644467	0.677561	0.640058	0.648267	0.698204	0.821057	0.832715	0.710521	0.784611	0.698204	0.821057	0.666967	0.784686	0.832715
0.216729	0.242383	0.263332	0.107226	0.224555	0.225297	0.259331	0.200795	0.161594	141	0.465542	0.492324	0.513159	0.327453	0.473873	0.474655	0.509245	0.448101	0.401987	141	0.796756	0.678081	0.877972	0.812342	0.830071	0.686671	0.739557	0.83535	0.668708	0.873206	0.792252	0.784898	0.653661	0.745088	0.81222	0.731818	0.648928	0.676001	0.647247	0.646011	0.699046	0.818709	0.829692	0.719267	0.780318	0.699046	0.818709	0.688387	0.778254	0.829692
0.225941	0.243663	0.27913	0.104606	0.234525	0.233338	0.246772	0.200361	0.156091	142	0.475332	0.493623	0.528328	0.323429	0.484278	0.48305	0.496762	0.447617	0.395083	142	0.791526	0.702708	0.878898	0.811946	0.825532	0.679227	0.742691	0.836408	0.674134	0.870814	0.789762	0.783147	0.649913	0.733763	0.805829	0.744932	0.664795	0.692563	0.659299	0.675605	0.728632	0.819257	0.829446	0.716632	0.77968	0.728632	0.819257	0.684371	0.775325	0.829446
0.21041	0.25307	0.288299	0.115634	0.229917	0.223076	0.25618	0.212605	0.168598	143	0.458705	0.50306	0.536935	0.340049	0.479497	0.47231	0.506142	0.461091	0.410607	143	0.791561	0.698591	0.887089	0.803068	0.815199	0.687698	0.733233	0.833135	0.667673	0.870537	0.788088	0.783075	0.649321	0.730431	0.8036	0.740711	0.655707	0.68656	0.658124	0.665012	0.721912	0.82192	0.835805	0.71575	0.779774	0.721912	0.82192	0.68749	0.770565	0.835805
0.215615	0.242187	0.290468	0.108849	0.226922	0.216636	0.259861	0.204029	0.163516	144	0.464343	0.492125	0.53895	0.329923	0.476364	0.465442	0.509766	0.451696	0.404371	144	0.794609	0.696312	0.890505	0.799599	0.816555	0.690882	0.736151	0.837266	0.659611	0.869947	0.781003	0.782205	0.651311	0.72303	0.798934	0.732712	0.646705	0.680846	0.655105	0.652446	0.712338	0.814885	0.83511	0.717782	0.771483	0.712338	0.814885	0.683502	0.765093	0.83511
0.218412	0.24698	0.280707	0.1116	0.213638	0.228431	0.259283	0.197241	0.153085	145	0.467346	0.496971	0.529818	0.334065	0.46221	0.477944	0.509198	0.444118	0.39126	145	0.796427	0.686247	0.889789	0.803826	0.820247	0.686096	0.73814	0.83628	0.657787	0.870986	0.782996	0.784708	0.650854	0.726794	0.803201	0.72902	0.637818	0.679136	0.646336	0.638556	0.700116	0.815266	0.836798	0.715736	0.772624	0.700116	0.815266	0.679622	0.767943	0.836798
0.209909	0.250075	0.267745	0.1117	0.220395	0.224299	0.262226	0.186657	0.150181	146	0.458158	0.500075	0.517441	0.334216	0.469462	0.473602	0.51208	0.432038	0.387531	146	0.795482	0.686598	0.888099	0.811424	0.81678	0.682599	0.735499	0.835848	0.661068	0.870924	0.78911	0.78492	0.649956	0.72605	0.803899	0.735065	0.653423	0.6851	0.648306	0.640202	0.705604	0.824764	0.837613	0.714994	0.771621	0.705604	0.824764	0.687544	0.773657	0.837613
0.206674	0.235302	0.270208	0.105646	0.211411	0.208543	0.247361	0.176259	0.135531	147	0.454614	0.485079	0.519815	0.325033	0.459795	0.456665	0.497354	0.419832	0.368145	147	0.782832	0.701807	0.884578	0.798308	0.815057	0.684918	0.745414	0.835478	0.658136	0.865174	0.785706	0.775621	0.634069	0.717844	0.797147	0.742193	0.645172	0.695908	0.66596	0.656674	0.713789	0.820445	0.833782	0.708002	0.773439	0.713789	0.820445	0.677047	0.760985	0.833782
0.208065	0.247002	0.281625	0.111389	0.224405	0.222317	0.253628	0.214798	0.166334	148	0.456141	0.496993	0.530684	0.333749	0.473714	0.471505	0.503615	0.463463	0.407841	148	0.782398	0.702979	0.882589	0.795897	0.815461	0.684936	0.754537	0.840025	0.659158	0.864326	0.782878	0.775788	0.634574	0.724047	0.799622	0.745266	0.640891	0.698687	0.668896	0.663036	0.715846	0.813702	0.836251	0.710752	0.78433	0.715846	0.813702	0.671534	0.760944	0.836251
0.207921	0.233882	0.284935	0.106472	0.225462	0.212941	0.246797	0.195065	0.153178	149	0.455984	0.483614	0.533793	0.326301	0.474828	0.461455	0.496787	0.441661	0.391379	149	0.786791	0.693088	0.88548	0.793701	0.818388	0.690314	0.764444	0.847958	0.643587	0.866121	0.777225	0.777454	0.641386	0.724232	0.801638	0.731829	0.632686	0.686727	0.658972	0.654198	0.704805	0.809238	0.836539	0.715178	0.783442	0.704805	0.809238	0.669549	0.763116	0.836539
0.212799	0.251259	0.285181	0.112778	0.226862	0.226494	0.262786	0.196952	0.154245	150	0.461301	0.501257	0.534024	0.335824	0.4763	0.475914	0.512626	0.443793	0.39274	150	0.78767	0.69022	0.884644	0.792124	0.818122	0.691243	0.762115	0.846368	0.648714	0.868418	0.781622	0.780236	0.643206	0.726135	0.808047	0.729897	0.626965	0.687188	0.6618	0.647563	0.700223	0.808413	0.837159	0.716571	0.781218	0.700223	0.808413	0.671652	0.759325	0.837159
0.21229	0.251798	0.277426	0.108448	0.218517	0.212393	0.237014	0.196407	0.147208	151	0.46075	0.501795	0.526712	0.329315	0.467458	0.460861	0.486841	0.443178	0.383678	151	0.786367	0.650128	0.882425	0.791847	0.817666	0.691098	0.762231	0.846334	0.607435	0.864749	0.779999	0.776909	0.639383	0.724244	0.8065	0.69774	0.584573	0.629285	0.606687	0.600479	0.653061	0.804554	0.829098	0.707815	0.776069	0.653061	0.804554	0.671368	0.759393	0.829098
0.207187	0.247251	0.283299	0.107356	0.216426	0.209674	0.259105	0.190328	0.150755	152	0.455178	0.497243	0.532258	0.327653	0.465216	0.457902	0.509024	0.436266	0.388272	152	0.780968	0.640082	0.880149	0.790789	0.81846	0.701062	0.757619	0.845918	0.597147	0.861791	0.778781	0.776657	0.654682	0.713849	0.804854	0.689707	0.575977	0.618728	0.612706	0.582461	0.642742	0.80308	0.828217	0.718203	0.769059	0.642742	0.80308	0.676804	0.756883	0.828217
0.202157	0.242084	0.25875	0.0982414	0.216936	0.220174	0.258875	0.177194	0.148816	153	0.449619	0.49202	0.508675	0.313435	0.465764	0.469227	0.508798	0.420944	0.385767	153	0.775961	0.633474	0.878245	0.788019	0.817891	0.694399	0.752962	0.843408	0.586728	0.858296	0.779993	0.777365	0.639822	0.703629	0.800677	0.68276	0.572144	0.617537	0.598925	0.572859	0.634506	0.801926	0.828888	0.709443	0.763398	0.634506	0.801926	0.66988	0.750108	0.828888
0.211158	0.244117	0.260932	0.104174	0.233523	0.221044	0.245837	0.194534	0.149041	154	0.459519	0.494082	0.510815	0.322761	0.483243	0.470153	0.495819	0.44106	0.386058	154	0.776653	0.644654	0.879261	0.788398	0.815043	0.69567	0.758428	0.844201	0.604727	0.862994	0.780123	0.768685	0.636764	0.715847	0.79942	0.692885	0.589355	0.629349	0.625187	0.58459	0.653388	0.807202	0.82648	0.721023	0.771202	0.653388	0.807202	0.673816	0.76197	0.82648
0.207428	0.242353	0.278488	0.10332	0.221096	0.205837	0.250004	0.18758	0.14753	155	0.455443	0.492294	0.52772	0.321434	0.470209	0.453693	0.500004	0.433105	0.384096	155	0.771575	0.658707	0.878318	0.781623	0.810027	0.695144	0.747162	0.83993	0.618106	0.861618	0.772987	0.762636	0.635386	0.704187	0.794369	0.704174	0.616179	0.649157	0.627998	0.605008	0.670018	0.808572	0.826434	0.719019	0.767208	0.670018	0.808572	0.673349	0.762133	0.826434
0.197995	0.224244	0.265067	0.0963062	0.210371	0.205416	0.250964	0.196822	0.15386	156	0.444966	0.473544	0.514846	0.310332	0.458662	0.453228	0.500963	0.443646	0.392251	156	0.767886	0.653981	0.877254	0.777921	0.811388	0.691039	0.745545	0.836298	0.615889	0.861376	0.768554	0.767288	0.636165	0.703047	0.793133	0.703373	0.610071	0.655274	0.632132	0.603728	0.670785	0.806672	0.828327	0.718494	0.766484	0.670785	0.806672	0.668456	0.760545	0.828327
0.207542	0.239519	0.275173	0.101656	0.207364	0.226197	0.236547	0.188859	0.148649	157	0.455567	0.489407	0.52457	0.318835	0.455372	0.475601	0.486361	0.434579	0.38555	157	0.767206	0.659512	0.879256	0.782383	0.810093	0.695926	0.748956	0.845088	0.617459	0.860762	0.766903	0.768368	0.639071	0.712135	0.799784	0.707384	0.616896	0.657169	0.639247	0.612088	0.683399	0.809936	0.828659	0.724521	0.775281	0.683399	0.809936	0.673187	0.761139	0.828659
0.201758	0.23385	0.285146	0.100405	0.226383	0.20463	0.244496	0.184615	0.146143	158	0.449174	0.48358	0.533991	0.316868	0.475797	0.452361	0.494465	0.429668	0.382287	158	0.763197	0.657615	0.878236	0.785544	0.807658	0.706748	0.747029	0.843073	0.626357	0.864084	0.77006	0.771278	0.65055	0.70976	0.798008	0.713878	0.62221	0.66258	0.649211	0.611674	0.683888	0.812064	0.836681	0.731964	0.774802	0.683888	0.812064	0.678964	0.763428	0.836681
0.218076	0.262421	0.268394	0.120714	0.231167	0.230679	0.254452	0.188666	0.153735	159	0.466986	0.512271	0.518068	0.347439	0.480799	0.48029	0.504433	0.434357	0.39209	159	0.767283	0.643493	0.879287	0.79109	0.80659	0.714038	0.745754	0.843767	0.614342	0.865595	0.774973	0.771547	0.657805	0.709575	0.799377	0.707334	0.597306	0.662322	0.640685	0.606422	0.670405	0.816935	0.836979	0.736126	0.774885	0.670405	0.816935	0.689123	0.764324	0.836979
0.218067	0.253093	0.281622	0.11625	0.218546	0.228648	0.251703	0.197409	0.151786	160	0.466976	0.503084	0.530681	0.340954	0.467489	0.478171	0.5017	0.444307	0.389598	160	0.744392	0.650852	0.873292	0.782277	0.798884	0.698324	0.747939	0.838387	0.622679	0.847975	0.756668	0.740324	0.647044	0.705033	0.785568	0.72555	0.602825	0.673405	0.637357	0.608641	0.675743	0.807926	0.822801	0.728182	0.782431	0.675743	0.807926	0.675318	0.765023	0.822801
0.207174	0.235492	0.264539	0.106261	0.222146	0.215285	0.244406	0.191212	0.151258	161	0.455163	0.485275	0.514334	0.325977	0.471323	0.463988	0.494374	0.437278	0.388919	161	0.737897	0.642342	0.867461	0.786156	0.792846	0.704899	0.744405	0.837613	0.613157	0.840108	0.760981	0.731283	0.65409	0.700357	0.784149	0.718937	0.599719	0.665083	0.635439	0.600964	0.669536	0.811308	0.812971	0.73224	0.776856	0.669536	0.811308	0.682551	0.767299	0.812971
0.202997	0.247626	0.281706	0.106787	0.215978	0.212342	0.255064	0.180217	0.142842	162	0.450552	0.49762	0.53076	0.326783	0.464735	0.460806	0.505038	0.42452	0.377945	162	0.729019	0.65005	0.863567	0.782302	0.78836	0.705749	0.73881	0.834561	0.607552	0.835769	0.751454	0.72355	0.649726	0.692722	0.775426	0.723462	0.60982	0.670799	0.637703	0.604602	0.681107	0.805061	0.807781	0.73317	0.771254	0.681107	0.805061	0.683875	0.761486	0.807781
0.205892	0.229786	0.26558	0.104642	0.214576	0.203904	0.259042	0.181103	0.144107	163	0.453753	0.47936	0.515345	0.323484	0.463224	0.451558	0.508962	0.425562	0.379614	163	0.72908	0.650813	0.864	0.779297	0.786286	0.703047	0.744995	0.834477	0.599998	0.831842	0.74756	0.719115	0.640761	0.705751	0.776478	0.717962	0.599892	0.662629	0.628566	0.623895	0.690493	0.801577	0.804738	0.727429	0.779915	0.690493	0.801577	0.678543	0.761108	0.804738
0.202592	0.238417	0.26166	0.102682	0.226051	0.20112	0.233399	0.183819	0.143367	164	0.450103	0.48828	0.511527	0.32044	0.475448	0.448464	0.483113	0.428741	0.378638	164	0.723911	0.65169	0.857966	0.77526	0.781318	0.694407	0.74709	0.82899	0.618306	0.837433	0.751914	0.69396	0.633274	0.710298	0.782734	0.730792	0.61141	0.641104	0.628608	0.631726	0.702692	0.802695	0.78801	0.71518	0.785907	0.702692	0.802695	0.670466	0.76551	0.78801
0.196217	0.22715	0.275669	0.0987338	0.216478	0.205496	0.248675	0.189543	0.146806	165	0.442964	0.476603	0.525042	0.314219	0.465272	0.453317	0.498673	0.435366	0.383153	165	0.721437	0.652984	0.859509	0.777578	0.784551	0.711324	0.740709	0.829328	0.62442	0.834951	0.747037	0.698963	0.649183	0.707934	0.780722	0.733426	0.621053	0.642352	0.629069	0.633601	0.706362	0.80347	0.792278	0.732462	0.780758	0.706362	0.80347	0.697202	0.764011	0.792278
0.206238	0.232641	0.276657	0.109071	0.222874	0.215184	0.263441	0.19126	0.149777	166	0.454134	0.482329	0.525982	0.330259	0.472095	0.463879	0.513265	0.437333	0.38701	166	0.721107	0.654226	0.860413	0.775216	0.786658	0.714684	0.73689	0.829519	0.62369	0.834472	0.746396	0.696017	0.647485	0.706114	0.781801	0.73307	0.612868	0.642711	0.627443	0.625286	0.700318	0.800484	0.79234	0.733159	0.776595	0.700318	0.800484	0.687787	0.758321	0.79234
0.223549	0.230216	0.272502	0.108262	0.225155	0.214169	0.251718	0.183974	0.147958	167	0.47281	0.479808	0.522018	0.329032	0.474505	0.462784	0.501716	0.428922	0.384654	167	0.724681	0.658017	0.861972	0.770593	0.787151	0.712893	0.709791	0.816414	0.62876	0.839372	0.746258	0.699122	0.650902	0.685176	0.774139	0.736806	0.608376	0.645035	0.627021	0.598158	0.686638	0.791899	0.791858	0.725066	0.743807	0.686638	0.791899	0.676475	0.740771	0.791858
0.199688	0.232655	0.2646	0.0976838	0.208376	0.207233	0.237226	0.178495	0.133969	168	0.446864	0.482344	0.514393	0.312544	0.456482	0.455228	0.487058	0.422487	0.366018	168	0.735022	0.649444	0.854916	0.759392	0.786413	0.710723	0.721328	0.813004	0.61606	0.841489	0.749475	0.699896	0.651374	0.68708	0.775418	0.729626	0.588239	0.626241	0.609233	0.580638	0.664284	0.779023	0.783391	0.716306	0.742579	0.664284	0.779023	0.673105	0.747292	0.783391
0.196941	0.236397	0.275985	0.0994323	0.206702	0.210775	0.261413	0.177704	0.137522	169	0.44378	0.486206	0.525343	0.315329	0.454645	0.459103	0.511285	0.421549	0.37084	169	0.734204	0.651647	0.851392	0.758896	0.783107	0.7118	0.726319	0.815657	0.618268	0.838074	0.74887	0.696014	0.652536	0.692216	0.778193	0.729134	0.590083	0.626552	0.609586	0.583419	0.665862	0.775711	0.781092	0.717121	0.738361	0.665862	0.775711	0.673913	0.750509	0.781092
0.196933	0.247815	0.273459	0.100674	0.213996	0.204482	0.239673	0.188888	0.142188	170	0.443772	0.49781	0.522933	0.317291	0.462597	0.452197	0.489565	0.434612	0.377079	170	0.736142	0.652883	0.85227	0.761055	0.780886	0.711761	0.7317	0.817239	0.61664	0.839747	0.751807	0.689211	0.640537	0.701519	0.780833	0.729986	0.592416	0.61993	0.598272	0.591863	0.667813	0.778773	0.775294	0.71146	0.745741	0.667813	0.778773	0.67274	0.756124	0.775294
0.203743	0.222962	0.27279	0.101146	0.199912	0.212902	0.244182	0.188543	0.143366	171	0.451379	0.472188	0.522293	0.318035	0.447115	0.461413	0.494148	0.434215	0.378637	171	0.744828	0.659229	0.85684	0.765012	0.786406	0.711872	0.736911	0.818487	0.617942	0.843595	0.751288	0.698392	0.649833	0.701621	0.781274	0.733471	0.594498	0.626431	0.600923	0.595011	0.66848	0.78027	0.781032	0.711749	0.748816	0.66848	0.78027	0.675727	0.756753	0.781032
0.208422	0.233353	0.280136	0.102663	0.213846	0.217318	0.255943	0.194613	0.149217	172	0.456533	0.483066	0.529279	0.32041	0.462435	0.466174	0.505908	0.44115	0.386287	172	0.747053	0.658276	0.854382	0.762933	0.786083	0.715316	0.735121	0.818384	0.619547	0.84642	0.750651	0.701087	0.651094	0.703899	0.783427	0.731675	0.593149	0.625226	0.60254	0.593079	0.667568	0.780876	0.778062	0.711863	0.74624	0.667568	0.780876	0.672671	0.756489	0.778062
0.200632	0.236943	0.259752	0.0979542	0.212883	0.197838	0.254696	0.180598	0.137779	173	0.447919	0.486768	0.509659	0.312976	0.461393	0.44479	0.504674	0.424969	0.371185	173	0.741186	0.64319	0.8474	0.755723	0.775699	0.700644	0.722457	0.807563	0.608098	0.838356	0.747249	0.696044	0.645137	0.69903	0.779946	0.721369	0.578742	0.607008	0.581394	0.57326	0.648917	0.768333	0.763533	0.690992	0.728739	0.648917	0.768333	0.668031	0.753033	0.763533
0.197466	0.215513	0.261501	0.095531	0.203606	0.209173	0.252387	0.180905	0.141775	174	0.444371	0.464233	0.511372	0.309081	0.451227	0.457354	0.502382	0.42533	0.376531	174	0.735653	0.648688	0.84595	0.751074	0.776519	0.690668	0.721137	0.805059	0.615871	0.83793	0.741666	0.697389	0.629495	0.698282	0.777258	0.725241	0.584592	0.606234	0.58845	0.575001	0.652273	0.766529	0.761079	0.683821	0.72695	0.652273	0.766529	0.65567	0.752251	0.761079
0.194969	0.233615	0.264098	0.0961721	0.200334	0.197852	0.234121	0.177729	0.131389	175	0.441553	0.483337	0.513905	0.310116	0.447586	0.444806	0.48386	0.421579	0.362476	175	0.748867	0.649307	0.849016	0.754611	0.768803	0.694487	0.726102	0.806188	0.61699	0.844961	0.750721	0.701707	0.652416	0.70915	0.791346	0.72481	0.585867	0.60841	0.592623	0.576084	0.655492	0.77004	0.757292	0.691312	0.73175	0.655492	0.77004	0.661526	0.755937	0.757292
0.20183	0.228649	0.273947	0.100839	0.218701	0.199332	0.242399	0.177109	0.135616	176	0.449255	0.478172	0.5234	0.317552	0.467655	0.446466	0.49234	0.420843	0.368261	176	0.74323	0.647859	0.84751	0.749288	0.768017	0.695973	0.718066	0.802044	0.616525	0.842735	0.756383	0.706577	0.659997	0.716541	0.796786	0.72424	0.584841	0.608841	0.594243	0.573751	0.654441	0.767112	0.757608	0.693608	0.7269	0.654441	0.767112	0.66497	0.762765	0.757608
0.203728	0.234995	0.269235	0.102848	0.207585	0.217996	0.246903	0.185748	0.140796	177	0.451362	0.484763	0.518879	0.320699	0.455615	0.466901	0.496894	0.430985	0.375228	177	0.737017	0.633815	0.843047	0.739621	0.76785	0.683948	0.719768	0.799674	0.60798	0.837587	0.747454	0.699036	0.652793	0.714675	0.793101	0.710546	0.56155	0.594837	0.588427	0.56823	0.645534	0.760347	0.75854	0.678709	0.728182	0.645534	0.760347	0.644734	0.767474	0.75854
0.189623	0.229391	0.267169	0.0995832	0.201297	0.20468	0.236689	0.170056	0.128218	178	0.435458	0.478948	0.516884	0.315568	0.448662	0.452416	0.486507	0.412379	0.358075	178	0.733582	0.625263	0.838841	0.7386	0.761359	0.675646	0.719386	0.79794	0.596575	0.832976	0.747011	0.693181	0.642995	0.7178	0.793047	0.704775	0.553738	0.58641	0.58147	0.556869	0.635991	0.758458	0.750763	0.670757	0.724857	0.635991	0.758458	0.638899	0.767432	0.750763
0.197154	0.234469	0.276215	0.102177	0.22018	0.20847	0.253342	0.192565	0.147694	179	0.444021	0.48422	0.525562	0.319651	0.469233	0.456586	0.503331	0.438823	0.384309	179	0.727646	0.627681	0.838948	0.738718	0.761305	0.667576	0.719158	0.796106	0.587561	0.828381	0.742435	0.685863	0.641332	0.724224	0.794217	0.701014	0.552895	0.583436	0.573822	0.55911	0.635223	0.757025	0.74624	0.668809	0.733973	0.635223	0.757025	0.633853	0.77011	0.74624
0.192077	0.233169	0.267472	0.104397	0.208691	0.203343	0.239403	0.184606	0.140468	180	0.438266	0.482875	0.517177	0.323105	0.456827	0.450935	0.489289	0.429658	0.37479	180	0.727951	0.631777	0.839306	0.740246	0.763439	0.666036	0.709799	0.794893	0.586199	0.825861	0.738405	0.684813	0.633927	0.712296	0.789014	0.697751	0.549674	0.588438	0.567152	0.539473	0.625581	0.75159	0.744307	0.660356	0.721664	0.625581	0.75159	0.62177	0.756056	0.744307
0.191099	0.221234	0.257802	0.090289	0.212412	0.209896	0.226765	0.175871	0.132	181	0.437149	0.470355	0.507742	0.300481	0.460882	0.458144	0.476199	0.41937	0.363318	181	0.732551	0.623141	0.847461	0.742825	0.75951	0.664849	0.704569	0.79586	0.574199	0.825149	0.736846	0.677901	0.631962	0.70277	0.784692	0.686912	0.539803	0.582517	0.562273	0.532289	0.617845	0.749977	0.738376	0.660159	0.711424	0.617845	0.749977	0.620137	0.749442	0.738376
0.197536	0.233483	0.264889	0.0990768	0.216099	0.214466	0.243403	0.181404	0.140337	182	0.44445	0.483201	0.514673	0.314765	0.464864	0.463105	0.493359	0.425916	0.374616	182	0.72924	0.635074	0.853901	0.750422	0.768974	0.682797	0.713906	0.802348	0.576941	0.817114	0.736433	0.673023	0.637781	0.700982	0.778785	0.69696	0.557425	0.602118	0.577141	0.546116	0.630797	0.764623	0.758367	0.676924	0.722799	0.630797	0.764623	0.649377	0.760649	0.758367
0.191033	0.220984	0.269656	0.098533	0.214018	0.211865	0.247714	0.185731	0.143129	183	0.437073	0.470089	0.519284	0.3139	0.462621	0.460288	0.497709	0.430965	0.378324	183	0.719007	0.624633	0.848861	0.740828	0.743635	0.675927	0.709086	0.796275	0.572403	0.811042	0.725546	0.654283	0.627646	0.694363	0.770589	0.692341	0.553209	0.602739	0.568234	0.536943	0.624349	0.756413	0.740483	0.669067	0.717473	0.624349	0.756413	0.639415	0.756943	0.740483
0.198522	0.221131	0.288958	0.0925662	0.205502	0.197502	0.248817	0.181352	0.134599	184	0.445558	0.470246	0.537548	0.304247	0.453323	0.444412	0.498816	0.425854	0.366877	184	0.720504	0.61964	0.850156	0.743662	0.746327	0.673936	0.710026	0.79958	0.567227	0.81337	0.730308	0.657641	0.626105	0.69767	0.775578	0.684631	0.5414	0.592522	0.558405	0.525748	0.614295	0.751534	0.73488	0.660469	0.714071	0.614295	0.751534	0.626918	0.753192	0.73488
0.182575	0.226954	0.25629	0.0916127	0.199176	0.200465	0.243807	0.189433	0.137478	185	0.427288	0.476397	0.506251	0.302676	0.446291	0.447733	0.493768	0.435239	0.37078	185	0.719336	0.614054	0.853023	0.735786	0.750002	0.668471	0.706606	0.799493	0.569945	0.812372	0.728668	0.655708	0.616397	0.696154	0.771205	0.698259	0.524205	0.607528	0.555107	0.520339	0.620933	0.749459	0.737117	0.661256	0.713526	0.620933	0.749459	0.604735	0.749321	0.737117
0.190505	0.235184	0.278578	0.103691	0.198135	0.203845	0.244309	0.182625	0.135229	186	0.436469	0.484958	0.527805	0.322011	0.445123	0.451492	0.494276	0.427347	0.367735	186	0.723208	0.614705	0.853806	0.736848	0.751276	0.672387	0.71614	0.805355	0.572697	0.813855	0.729263	0.64437	0.614256	0.692967	0.769421	0.698973	0.525382	0.607582	0.557948	0.526507	0.625043	0.750168	0.7318	0.66275	0.717612	0.625043	0.750168	0.605912	0.751215	0.7318
0.205423	0.223926	0.266751	0.0937795	0.200644	0.213478	0.255249	0.183131	0.139535	187	0.453236	0.473208	0.516479	0.306234	0.447933	0.462037	0.505221	0.427938	0.373544	187	0.719936	0.61708	0.857821	0.737086	0.750973	0.672893	0.716666	0.803056	0.5664	0.813927	0.723667	0.652165	0.622132	0.697593	0.777358	0.691158	0.525421	0.607551	0.556795	0.526421	0.626845	0.752134	0.736388	0.666671	0.722058	0.626845	0.752134	0.605525	0.750373	0.736388
0.195118	0.222355	0.264071	0.101323	0.204136	0.209157	0.240178	0.193661	0.14188	188	0.441721	0.471546	0.513879	0.318312	0.451815	0.457337	0.490079	0.440069	0.37667	188	0.711769	0.597223	0.862377	0.745102	0.746709	0.661667	0.718157	0.8025	0.558549	0.810031	0.710818	0.635104	0.614898	0.689597	0.767436	0.681061	0.503975	0.576733	0.538657	0.50947	0.606426	0.751835	0.736716	0.670831	0.723006	0.606426	0.751835	0.612115	0.754277	0.736716
0.204945	0.227981	0.25884	0.0951924	0.19648	0.201446	0.23741	0.179711	0.133076	189	0.452709	0.477474	0.508763	0.308533	0.44326	0.448828	0.487248	0.423923	0.364796	189	0.709144	0.592531	0.859832	0.740354	0.739368	0.65177	0.71127	0.798533	0.554924	0.812515	0.71026	0.634999	0.603429	0.687188	0.766855	0.678082	0.498265	0.570027	0.530134	0.501982	0.601888	0.749002	0.729265	0.656175	0.706161	0.601888	0.749002	0.596961	0.746719	0.729265
0.190685	0.222695	0.26932	0.0947161	0.192252	0.199798	0.24267	0.186317	0.136206	190	0.436675	0.471906	0.51896	0.30776	0.438466	0.446987	0.492615	0.431645	0.369061	190	0.69798	0.601769	0.860779	0.750228	0.739474	0.642292	0.707791	0.800854	0.555001	0.808265	0.705432	0.62719	0.597293	0.682079	0.761108	0.680764	0.502808	0.573393	0.525995	0.50266	0.605096	0.749624	0.727397	0.648889	0.702862	0.605096	0.749624	0.586382	0.744045	0.727397
0.189149	0.216129	0.271141	0.0973803	0.20755	0.202544	0.248947	0.183124	0.140343	191	0.434912	0.464897	0.520712	0.312058	0.455577	0.450049	0.498946	0.42793	0.374623	191	0.699226	0.596777	0.861441	0.754607	0.735287	0.621156	0.710182	0.801685	0.549565	0.808334	0.709768	0.622841	0.577449	0.683018	0.761263	0.672603	0.503787	0.566354	0.508236	0.490134	0.596501	0.755172	0.719355	0.618254	0.706495	0.596501	0.755172	0.57174	0.753318	0.719355
0.196164	0.224138	0.2625	0.0968667	0.208009	0.196418	0.229572	0.18428	0.137019	192	0.442905	0.473432	0.512347	0.311234	0.45608	0.44319	0.479137	0.429278	0.37016	192	0.692015	0.603762	0.85853	0.759887	0.721943	0.615774	0.695109	0.801138	0.550941	0.811644	0.711489	0.623003	0.580962	0.683881	0.767417	0.668106	0.500018	0.554971	0.493338	0.475224	0.588247	0.751595	0.711796	0.606891	0.697174	0.588247	0.751595	0.557999	0.742057	0.711796
0.192404	0.224975	0.257657	0.0971035	0.204432	0.197778	0.232618	0.177864	0.131539	193	0.438639	0.474315	0.507599	0.311614	0.452141	0.444723	0.482305	0.421739	0.362684	193	0.684012	0.590402	0.852052	0.750649	0.718513	0.611943	0.681207	0.783864	0.5453	0.808139	0.705566	0.617243	0.582458	0.677182	0.759444	0.664679	0.493349	0.543975	0.505756	0.474747	0.592796	0.743972	0.706824	0.612825	0.689023	0.592796	0.743972	0.563327	0.733111	0.706824
0.1883	0.213695	0.261235	0.0880464	0.211265	0.208662	0.245223	0.186174	0.142183	194	0.433935	0.462272	0.511112	0.296726	0.459635	0.456795	0.4952	0.431479	0.377071	194	0.677309	0.593491	0.846518	0.74669	0.716751	0.614499	0.678743	0.781423	0.542462	0.793672	0.698367	0.609085	0.5777	0.667613	0.751084	0.674549	0.495974	0.551323	0.516181	0.484405	0.599961	0.734735	0.709533	0.625972	0.69328	0.599961	0.734735	0.56545	0.729095	0.709533
0.207801	0.222782	0.269772	0.100095	0.193916	0.20334	0.228734	0.182017	0.131459	195	0.455852	0.471997	0.519395	0.316378	0.440359	0.450933	0.478262	0.426635	0.362573	195	0.678475	0.596269	0.848872	0.75205	0.71943	0.580046	0.671481	0.784384	0.544575	0.794455	0.708119	0.617067	0.5653	0.672659	0.764184	0.677844	0.497334	0.55193	0.490243	0.47721	0.600866	0.74716	0.720365	0.6072	0.696979	0.600866	0.74716	0.520757	0.712396	0.720365
0.192649	0.233211	0.258612	0.0947943	0.209361	0.193849	0.231491	0.179805	0.138098	196	0.438918	0.482919	0.50854	0.307887	0.45756	0.440283	0.481135	0.424034	0.371615	196	0.674719	0.576687	0.835577	0.759229	0.708255	0.596837	0.658843	0.780108	0.534995	0.789922	0.705458	0.609489	0.56808	0.666399	0.758338	0.671807	0.497505	0.54069	0.500737	0.464426	0.598296	0.751701	0.71059	0.622734	0.686635	0.598296	0.751701	0.525905	0.71163	0.71059
0.188186	0.213276	0.250121	0.0836525	0.207338	0.19273	0.234206	0.176958	0.126574	197	0.433804	0.461818	0.500121	0.289227	0.455344	0.43901	0.483948	0.420663	0.355772	197	0.674794	0.574677	0.834821	0.755174	0.716016	0.611435	0.66292	0.781121	0.534494	0.788578	0.69398	0.622782	0.588508	0.669568	0.755774	0.671079	0.497084	0.536753	0.498803	0.460886	0.593798	0.747655	0.714103	0.631797	0.685846	0.593798	0.747655	0.535004	0.704961	0.714103
0.190635	0.225966	0.255328	0.0933011	0.194295	0.203947	0.244444	0.167984	0.133239	198	0.436618	0.475359	0.5053	0.305452	0.440789	0.451605	0.494413	0.409859	0.365019	198	0.682578	0.588074	0.842544	0.759376	0.702433	0.610924	0.666096	0.78362	0.54583	0.792396	0.707843	0.610885	0.59027	0.677209	0.760824	0.675677	0.520545	0.531764	0.505536	0.476141	0.605013	0.768717	0.711372	0.637408	0.696374	0.605013	0.768717	0.53507	0.706972	0.711372
0.195487	0.219238	0.250737	0.0912675	0.200329	0.186977	0.247341	0.167244	0.129558	199	0.442139	0.468229	0.500737	0.302105	0.447581	0.432408	0.497334	0.408955	0.359942	199	0.68821	0.594252	0.845595	0.764851	0.698669	0.610729	0.667323	0.785932	0.553832	0.79529	0.71367	0.605	0.587083	0.681803	0.761581	0.680974	0.527184	0.53882	0.51328	0.479713	0.612629	0.773373	0.708724	0.637034	0.69891	0.612629	0.773373	0.538256	0.708392	0.708724
0.189538	0.241148	0.261194	0.0927828	0.185027	0.18652	0.232023	0.181041	0.135484	200	0.435359	0.491068	0.511071	0.304603	0.430148	0.43188	0.481688	0.425489	0.368082	200	0.684624	0.607236	0.845686	0.75941	0.708735	0.591018	0.67644	0.782395	0.564123	0.795489	0.714822	0.614202	0.568877	0.685805	0.755697	0.688733	0.539446	0.545382	0.520599	0.485237	0.619608	0.773467	0.714748	0.626064	0.703401	0.619608	0.773467	0.516832	0.716044	0.714748
0.200456	0.228736	0.274623	0.100262	0.216526	0.199385	0.233209	0.177892	0.133941	201	0.447723	0.478264	0.524045	0.316642	0.465323	0.446525	0.482917	0.421773	0.36598	201	0.686781	0.599013	0.847533	0.755004	0.719308	0.584315	0.678922	0.78377	0.56128	0.801377	0.73626	0.642841	0.573644	0.680897	0.748828	0.678384	0.539527	0.545065	0.517569	0.475316	0.611825	0.765912	0.725554	0.617186	0.707176	0.611825	0.765912	0.516348	0.713247	0.725554
0.19816	0.220922	0.272099	0.0989384	0.197516	0.193767	0.23267	0.167831	0.123934	202	0.445152	0.470023	0.521632	0.314545	0.444428	0.44019	0.482359	0.409672	0.352042	202	0.670728	0.580105	0.8378	0.738969	0.711365	0.580463	0.673833	0.776782	0.540475	0.791626	0.722315	0.624079	0.569661	0.672861	0.738442	0.660439	0.512214	0.539266	0.510116	0.46506	0.59961	0.749397	0.709452	0.616095	0.701034	0.59961	0.749397	0.514059	0.712046	0.709452
0.183058	0.219441	0.272763	0.0925507	0.196819	0.199944	0.239647	0.168504	0.126935	203	0.427853	0.468445	0.522267	0.304221	0.443643	0.447151	0.489538	0.410492	0.356279	203	0.669451	0.552357	0.829194	0.738788	0.717992	0.580725	0.687425	0.786135	0.521751	0.789331	0.723231	0.629954	0.567419	0.67882	0.74288	0.640128	0.489703	0.516127	0.504913	0.464145	0.58753	0.744339	0.706353	0.617884	0.71393	0.58753	0.744339	0.511131	0.717987	0.706353
0.194744	0.21458	0.259926	0.10176	0.200027	0.202554	0.242907	0.180661	0.130182	204	0.441298	0.463228	0.509829	0.318999	0.447243	0.45006	0.492856	0.425043	0.360808	204	0.669693	0.548788	0.829	0.739103	0.718118	0.579898	0.681799	0.784223	0.508751	0.785063	0.7211	0.625926	0.563239	0.671423	0.737754	0.629645	0.473916	0.499721	0.488398	0.463716	0.579412	0.739391	0.700413	0.61043	0.712648	0.579412	0.739391	0.50434	0.713463	0.700413
0.18253	0.22035	0.273077	0.087907	0.19452	0.209454	0.229409	0.170433	0.12369	205	0.427235	0.469415	0.522568	0.296491	0.441044	0.457662	0.478966	0.412836	0.351696	205	0.677423	0.553496	0.825614	0.73621	0.710225	0.572065	0.675087	0.782965	0.521372	0.803231	0.731701	0.626905	0.570549	0.673881	0.742863	0.640632	0.487424	0.49824	0.492777	0.464436	0.584255	0.740385	0.690608	0.600819	0.70651	0.584255	0.740385	0.502769	0.706172	0.690608
0.181167	0.225152	0.258726	0.090717	0.203184	0.205632	0.24288	0.181983	0.134334	206	0.425637	0.474502	0.508651	0.301193	0.450759	0.453467	0.492829	0.426594	0.366517	206	0.670047	0.550705	0.821128	0.731115	0.712456	0.566902	0.672684	0.780465	0.520546	0.807184	0.735028	0.602784	0.549589	0.679274	0.744494	0.648446	0.486373	0.459158	0.482179	0.471458	0.58859	0.744603	0.684032	0.585349	0.710609	0.58859	0.744603	0.486632	0.710563	0.684032
0.196424	0.231025	0.263358	0.0908081	0.199649	0.197554	0.224765	0.178194	0.127636	207	0.443197	0.48065	0.513184	0.301344	0.446821	0.44447	0.474094	0.422131	0.357262	207	0.670232	0.550867	0.821004	0.733894	0.718111	0.560488	0.674915	0.785315	0.513609	0.800409	0.719868	0.585651	0.529782	0.665305	0.734166	0.648685	0.486009	0.454741	0.467387	0.470128	0.586258	0.745392	0.680601	0.565212	0.7101	0.586258	0.745392	0.452518	0.705209	0.680601
0.182209	0.222467	0.252869	0.092705	0.195138	0.193599	0.225071	0.172434	0.124518	208	0.42686	0.471664	0.502861	0.304475	0.441745	0.439999	0.474417	0.415252	0.352872	208	0.637011	0.529972	0.813641	0.716088	0.701315	0.56976	0.657806	0.775324	0.50254	0.798302	0.710474	0.576933	0.5489	0.656738	0.730505	0.643263	0.475396	0.446244	0.475496	0.460634	0.580097	0.740972	0.675563	0.572143	0.705265	0.580097	0.740972	0.462738	0.698425	0.675563
0.191125	0.213733	0.260935	0.0943603	0.197352	0.202441	0.236911	0.186702	0.134103	209	0.437179	0.462313	0.510818	0.307181	0.444243	0.449935	0.486735	0.43209	0.3662	209	0.63581	0.530855	0.813976	0.713316	0.700088	0.574393	0.656847	0.774333	0.506155	0.794966	0.701184	0.574955	0.564167	0.656674	0.730737	0.647446	0.474448	0.448674	0.480583	0.462818	0.582068	0.732547	0.674385	0.586523	0.705411	0.582068	0.732547	0.465713	0.693101	0.674385
0.183527	0.209154	0.241747	0.0847988	0.184534	0.193337	0.232406	0.16626	0.119032	210	0.4284	0.457334	0.491677	0.291202	0.429574	0.439701	0.482085	0.40775	0.34501	210	0.633447	0.525469	0.809531	0.707965	0.693312	0.563342	0.646814	0.765847	0.50291	0.795698	0.699476	0.572171	0.559325	0.657825	0.731253	0.643285	0.468298	0.441282	0.471922	0.454021	0.574552	0.726823	0.665103	0.575803	0.694984	0.574552	0.726823	0.453865	0.685855	0.665103
0.183709	0.219345	0.267929	0.0875848	0.181973	0.191301	0.243916	0.174993	0.130108	211	0.428613	0.468342	0.517619	0.295947	0.426583	0.43738	0.493878	0.418322	0.360705	211	0.638396	0.541697	0.810817	0.71247	0.694433	0.567459	0.64948	0.76635	0.51426	0.795593	0.705848	0.580086	0.568383	0.660021	0.730878	0.650967	0.480689	0.460483	0.487657	0.462701	0.582347	0.726144	0.666604	0.577108	0.696212	0.582347	0.726144	0.468536	0.686922	0.666604
0.192597	0.213251	0.251632	0.0924289	0.177661	0.19069	0.231301	0.165247	0.120034	212	0.438858	0.461791	0.50163	0.304021	0.421498	0.436681	0.480938	0.406505	0.34646	212	0.626036	0.525053	0.81041	0.716579	0.695004	0.553078	0.644793	0.76562	0.498061	0.790301	0.70682	0.570349	0.553696	0.650932	0.719739	0.643023	0.480644	0.44606	0.4629	0.445062	0.561769	0.729154	0.666448	0.568956	0.693888	0.561769	0.729154	0.470258	0.690946	0.666448
0.179175	0.214369	0.260226	0.0854105	0.193336	0.194779	0.228012	0.17943	0.127538	213	0.42329	0.463	0.510124	0.292251	0.4397	0.441338	0.477506	0.423592	0.357125	213	0.637186	0.510106	0.811852	0.738125	0.703853	0.56886	0.663623	0.77587	0.483485	0.796889	0.716081	0.580365	0.566864	0.661629	0.725662	0.628106	0.47514	0.433118	0.447235	0.434232	0.55055	0.746045	0.67402	0.582184	0.708325	0.55055	0.746045	0.484212	0.697429	0.67402
0.190791	0.210986	0.266389	0.0934672	0.192077	0.186821	0.237282	0.171629	0.127595	214	0.436796	0.459332	0.516129	0.305724	0.438266	0.432228	0.487116	0.414281	0.357205	214	0.637723	0.508742	0.811827	0.739054	0.704406	0.567962	0.665116	0.777619	0.479271	0.800478	0.714799	0.577137	0.563789	0.656736	0.726726	0.627892	0.468113	0.424531	0.445624	0.421991	0.54378	0.748239	0.67516	0.579886	0.710451	0.54378	0.748239	0.48296	0.691245	0.67516
0.192882	0.213721	0.255387	0.0942428	0.187906	0.200128	0.238481	0.179972	0.131154	215	0.439184	0.462299	0.505358	0.30699	0.433481	0.447357	0.488345	0.424231	0.362151	215	0.64436	0.491421	0.806023	0.734981	0.716533	0.566249	0.671282	0.777471	0.47776	0.805712	0.715555	0.584535	0.568129	0.661508	0.73107	0.614666	0.457856	0.425217	0.432764	0.414851	0.531787	0.745617	0.682112	0.573914	0.710897	0.531787	0.745617	0.478629	0.689246	0.682112
0.176256	0.203082	0.252706	0.086992	0.188307	0.186802	0.236292	0.164799	0.119096	216	0.419828	0.450646	0.502699	0.294944	0.433943	0.432206	0.486099	0.405954	0.345102	216	0.608441	0.493212	0.80006	0.723839	0.717103	0.573316	0.668177	0.775197	0.460761	0.784618	0.70843	0.5412	0.519223	0.629384	0.700147	0.616851	0.452563	0.427079	0.434821	0.415941	0.533269	0.741013	0.67519	0.570159	0.704409	0.533269	0.741013	0.459891	0.678951	0.67519
0.187585	0.213854	0.259123	0.0934169	0.189432	0.192432	0.223513	0.178751	0.131361	217	0.433111	0.462443	0.509042	0.305642	0.435238	0.438671	0.472772	0.42279	0.362437	217	0.613216	0.491006	0.800119	0.720455	0.719115	0.569372	0.668448	0.77591	0.459778	0.786799	0.705897	0.549518	0.518377	0.630437	0.703256	0.614603	0.448829	0.423226	0.430108	0.414422	0.53075	0.737337	0.67278	0.562402	0.704803	0.53075	0.737337	0.45137	0.677597	0.67278
0.18506	0.236543	0.259054	0.0975953	0.199933	0.196525	0.245261	0.192575	0.141046	218	0.430187	0.486356	0.508974	0.312403	0.447138	0.443311	0.495239	0.438834	0.375561	218	0.610844	0.475165	0.795226	0.719388	0.711663	0.580199	0.665049	0.771361	0.450115	0.787622	0.704674	0.543985	0.523952	0.627354	0.702551	0.60247	0.438634	0.412279	0.431047	0.392443	0.515412	0.737156	0.665882	0.576266	0.69471	0.515412	0.737156	0.457467	0.675478	0.665882
0.183688	0.204667	0.254425	0.0847146	0.185385	0.180606	0.217342	0.168079	0.123214	219	0.428588	0.452402	0.504406	0.291058	0.430564	0.424977	0.4662	0.409975	0.351019	219	0.604485	0.444013	0.795597	0.709283	0.707186	0.56907	0.659354	0.775147	0.412083	0.768042	0.685118	0.528301	0.487515	0.579435	0.671136	0.574189	0.415653	0.378206	0.399355	0.362208	0.478352	0.720543	0.655822	0.546634	0.661184	0.478352	0.720543	0.427134	0.655756	0.655822
0.18473	0.216464	0.264981	0.0848714	0.185826	0.196584	0.238669	0.169713	0.116717	220	0.429803	0.465256	0.514763	0.291327	0.431075	0.443378	0.488538	0.411963	0.341638	220	0.613673	0.448572	0.798224	0.709928	0.714337	0.590653	0.651253	0.774389	0.426319	0.774515	0.688212	0.532667	0.503034	0.573512	0.682889	0.582585	0.419133	0.385156	0.420645	0.353765	0.487972	0.721002	0.658983	0.564756	0.651278	0.487972	0.721002	0.440866	0.651029	0.658983
0.177395	0.203954	0.235296	0.0820745	0.183786	0.177399	0.223274	0.168734	0.121938	221	0.421183	0.451613	0.485073	0.286486	0.428703	0.421187	0.472518	0.410773	0.349197	221	0.610745	0.454558	0.806315	0.708056	0.70931	0.579491	0.658509	0.779407	0.420682	0.773627	0.688	0.525086	0.492083	0.573518	0.687141	0.599613	0.41854	0.374089	0.402916	0.365781	0.498213	0.716897	0.659924	0.560185	0.66329	0.498213	0.716897	0.436469	0.649813	0.659924
0.181062	0.201863	0.261786	0.0834031	0.182543	0.190458	0.23163	0.169235	0.126202	222	0.425513	0.449292	0.51165	0.288796	0.42725	0.436415	0.481279	0.411382	0.355249	222	0.618518	0.481876	0.808175	0.715606	0.705142	0.58748	0.660069	0.778583	0.439495	0.776125	0.694064	0.522796	0.499944	0.579082	0.691597	0.613978	0.450447	0.372615	0.419524	0.392365	0.525253	0.717432	0.658676	0.565322	0.666953	0.525253	0.717432	0.449202	0.650104	0.658676
0.190825	0.225027	0.243773	0.0904759	0.214805	0.188618	0.223747	0.183113	0.126897	223	0.436835	0.47437	0.493734	0.300792	0.46347	0.434301	0.473019	0.427917	0.356226	223	0.618521	0.475013	0.809668	0.715676	0.699815	0.580292	0.657709	0.775588	0.441553	0.772201	0.693154	0.524783	0.501506	0.57865	0.699578	0.616296	0.449364	0.359738	0.407799	0.384586	0.511597	0.717164	0.656141	0.561151	0.668419	0.511597	0.717164	0.445637	0.649854	0.656141
0.184237	0.216454	0.266766	0.0836117	0.188491	0.188403	0.233434	0.167119	0.122354	224	0.429228	0.465246	0.516494	0.289157	0.434156	0.434054	0.483151	0.408802	0.349791	224	0.601347	0.505394	0.801739	0.705134	0.706316	0.588117	0.638878	0.770155	0.466555	0.76449	0.673604	0.52351	0.51076	0.552679	0.688911	0.634011	0.500265	0.380395	0.410977	0.413381	0.535059	0.710676	0.653791	0.566922	0.655821	0.535059	0.710676	0.466631	0.61731	0.653791
0.182264	0.215459	0.257342	0.0865343	0.185252	0.192451	0.225619	0.167836	0.117409	225	0.426924	0.464175	0.507289	0.294167	0.430409	0.438692	0.474994	0.409678	0.342649	225	0.593394	0.471208	0.806345	0.706736	0.704861	0.582521	0.645175	0.770856	0.441187	0.766659	0.669327	0.51949	0.502906	0.550267	0.683677	0.624698	0.475354	0.361306	0.38794	0.389549	0.508265	0.714667	0.655583	0.568095	0.660698	0.508265	0.714667	0.46267	0.621897	0.655583
0.171539	0.204714	0.25338	0.0839245	0.189102	0.183374	0.234907	0.158696	0.122264	226	0.414173	0.452453	0.503368	0.289697	0.434858	0.428222	0.484672	0.398367	0.349662	226	0.610043	0.461567	0.816815	0.691042	0.704408	0.598137	0.663088	0.783132	0.434054	0.775655	0.662069	0.523112	0.519875	0.566668	0.697619	0.615916	0.47092	0.354458	0.390963	0.386385	0.505844	0.704333	0.659326	0.583402	0.676038	0.505844	0.704333	0.464413	0.615418	0.659326
0.177099	0.213579	0.27073	0.0902131	0.204063	0.190809	0.239653	0.17531	0.122533	227	0.420831	0.462146	0.520317	0.300355	0.451733	0.436817	0.489544	0.418701	0.350048	227	0.623791	0.463421	0.823396	0.700927	0.705901	0.616671	0.658717	0.7881	0.435255	0.781835	0.669714	0.528206	0.534782	0.566572	0.702148	0.613659	0.467525	0.354665	0.386839	0.389373	0.502335	0.708529	0.661659	0.592993	0.67575	0.502335	0.708529	0.465068	0.62124	0.661659
0.190249	0.206503	0.254481	0.08962	0.195065	0.19213	0.233002	0.164208	0.121118	228	0.436175	0.454426	0.504461	0.299366	0.441661	0.438327	0.482702	0.405226	0.34802	228	0.632402	0.481597	0.829975	0.717676	0.712184	0.627119	0.67064	0.795312	0.439476	0.783478	0.673936	0.532801	0.537043	0.571699	0.707039	0.610062	0.442938	0.357051	0.376098	0.387256	0.513218	0.704976	0.663251	0.589514	0.675019	0.513218	0.704976	0.449492	0.615076	0.663251
0.175254	0.217069	0.244199	0.0858566	0.183425	0.185506	0.221299	0.166242	0.117458	229	0.418634	0.465907	0.494165	0.293013	0.428281	0.430704	0.470424	0.407728	0.342721	229	0.634282	0.475422	0.824558	0.705329	0.705193	0.619734	0.674758	0.789197	0.436658	0.785297	0.675747	0.530175	0.532631	0.568018	0.69832	0.606268	0.437189	0.350761	0.376909	0.393103	0.51461	0.695384	0.655522	0.582058	0.675896	0.51461	0.695384	0.441088	0.619625	0.655522
0.17706	0.22225	0.263709	0.0921449	0.191355	0.194252	0.225421	0.168563	0.125521	230	0.420784	0.471434	0.513526	0.303554	0.437441	0.44074	0.474786	0.410565	0.354289	230	0.634672	0.473631	0.827386	0.68274	0.709064	0.62276	0.672985	0.791405	0.44335	0.782402	0.663358	0.528359	0.540703	0.563631	0.69753	0.607416	0.436861	0.351422	0.377311	0.39516	0.515083	0.674966	0.658168	0.587584	0.673185	0.515083	0.674966	0.434452	0.608477	0.658168
0.180122	0.216459	0.246534	0.0860896	0.193602	0.195922	0.235304	0.174114	0.125458	231	0.424408	0.465252	0.496522	0.29341	0.440002	0.442631	0.485082	0.41727	0.3542	231	0.630213	0.463518	0.831005	0.679281	0.706271	0.620693	0.668871	0.789519	0.422436	0.767773	0.649708	0.50711	0.543427	0.549998	0.686524	0.584517	0.416212	0.324847	0.376085	0.375961	0.499457	0.661097	0.643786	0.59002	0.666073	0.499457	0.661097	0.432271	0.598824	0.643786
0.172427	0.210755	0.246249	0.08309	0.179573	0.182712	0.233953	0.165951	0.114785	232	0.415243	0.459081	0.496235	0.288253	0.423761	0.427448	0.483687	0.407371	0.338799	232	0.628411	0.481713	0.823817	0.677404	0.706182	0.577917	0.653171	0.769522	0.434716	0.765775	0.640889	0.496221	0.516306	0.534493	0.673463	0.592344	0.430273	0.33958	0.363588	0.380818	0.503273	0.657572	0.640296	0.570016	0.659097	0.503273	0.657572	0.399277	0.582294	0.640296
0.174978	0.199088	0.239736	0.0842042	0.187655	0.182182	0.221157	0.170739	0.123192	233	0.418304	0.446193	0.489628	0.29018	0.433192	0.426827	0.470274	0.413206	0.350987	233	0.629729	0.478545	0.82438	0.683549	0.711585	0.582303	0.658923	0.773578	0.434376	0.765011	0.638329	0.494883	0.508328	0.530729	0.671729	0.591169	0.424022	0.334479	0.363046	0.377798	0.497796	0.657073	0.639796	0.568594	0.658847	0.497796	0.657073	0.402548	0.590782	0.639796
0.188067	0.206978	0.254266	0.0861024	0.180664	0.195729	0.231318	0.165294	0.124346	234	0.433666	0.454948	0.504248	0.293432	0.425046	0.442412	0.480955	0.406564	0.352628	234	0.63	0.47941	0.824812	0.686078	0.712598	0.585318	0.657626	0.775185	0.434755	0.767294	0.642189	0.495722	0.508922	0.536489	0.680322	0.595787	0.430436	0.335902	0.362641	0.389002	0.51141	0.655614	0.640565	0.572232	0.654799	0.51141	0.655614	0.408843	0.580615	0.640565
0.179472	0.205841	0.24901	0.084952	0.189896	0.184728	0.235346	0.172917	0.123297	235	0.423642	0.453697	0.499009	0.291465	0.435771	0.429799	0.485124	0.415833	0.351137	235	0.633581	0.473687	0.824264	0.689781	0.699947	0.576311	0.655806	0.76514	0.436038	0.771217	0.644168	0.491347	0.505262	0.535097	0.67707	0.593836	0.430299	0.323688	0.355348	0.385197	0.503208	0.657	0.63114	0.564819	0.651071	0.503208	0.657	0.405622	0.579687	0.63114
0.179153	0.206529	0.25386	0.0864851	0.183624	0.198	0.224173	0.168956	0.120785	236	0.423265	0.454454	0.503846	0.294084	0.428514	0.444972	0.473469	0.411042	0.347541	236	0.632034	0.47425	0.82008	0.684308	0.697183	0.567255	0.649437	0.760106	0.447931	0.774479	0.648344	0.488719	0.513481	0.534225	0.682514	0.603576	0.440211	0.323408	0.375025	0.38737	0.515256	0.657001	0.626157	0.569189	0.645921	0.515256	0.657001	0.399609	0.566685	0.626157
0.178862	0.200298	0.249206	0.0833421	0.185616	0.186159	0.220618	0.16652	0.11922	237	0.422921	0.447547	0.499205	0.28869	0.430832	0.431461	0.4697	0.408069	0.345282	237	0.633159	0.466665	0.818546	0.683346	0.691963	0.563347	0.644896	0.757775	0.44125	0.778229	0.655166	0.483127	0.505939	0.532715	0.683533	0.594984	0.431594	0.306448	0.370766	0.377186	0.506708	0.659372	0.614049	0.56332	0.640001	0.506708	0.659372	0.392622	0.56234	0.614049
0.180097	0.207243	0.25766	0.0846049	0.186891	0.184858	0.229435	0.162588	0.118092	238	0.424379	0.45524	0.507602	0.290869	0.432309	0.429952	0.478994	0.403222	0.343645	238	0.647098	0.482474	0.821751	0.686041	0.695453	0.585472	0.654225	0.761602	0.458568	0.785618	0.66685	0.496564	0.525257	0.550738	0.696342	0.604665	0.443206	0.320635	0.398253	0.398309	0.51994	0.663255	0.618761	0.579391	0.647324	0.51994	0.663255	0.414396	0.567563	0.618761
0.184748	0.215008	0.257471	0.0909286	0.186224	0.185416	0.223495	0.166143	0.118319	239	0.429823	0.463689	0.507416	0.301544	0.431537	0.430599	0.472753	0.407607	0.343975	239	0.659035	0.462621	0.826349	0.687759	0.682218	0.588478	0.66884	0.76741	0.44033	0.793816	0.672648	0.483486	0.532372	0.575781	0.708121	0.585775	0.424341	0.308105	0.384002	0.380723	0.500074	0.66699	0.605242	0.583663	0.66376	0.500074	0.66699	0.415318	0.578293	0.605242
0.180907	0.215011	0.252884	0.0912395	0.180002	0.184537	0.229773	0.169711	0.12263	240	0.425332	0.463693	0.502876	0.302059	0.424267	0.429578	0.479347	0.41196	0.350185	240	0.644687	0.432427	0.814425	0.677471	0.674644	0.588505	0.660949	0.761765	0.42338	0.785982	0.661424	0.474121	0.53047	0.56192	0.69897	0.573787	0.397891	0.3	0.372933	0.347104	0.473247	0.652457	0.599595	0.584967	0.64901	0.473247	0.652457	0.41098	0.568627	0.599595
0.175975	0.211324	0.249969	0.0863408	0.177987	0.19158	0.222023	0.171729	0.12081	241	0.419493	0.4597	0.499969	0.293838	0.421885	0.437699	0.471193	0.414401	0.347578	241	0.635717	0.42929	0.811666	0.679141	0.673914	0.581006	0.656835	0.7572	0.415607	0.778147	0.658775	0.467935	0.520828	0.549999	0.686341	0.570884	0.402623	0.300485	0.366147	0.346802	0.472893	0.656081	0.598502	0.576445	0.639831	0.472893	0.656081	0.406225	0.575693	0.598502
0.170864	0.214852	0.240626	0.0838385	0.183387	0.188336	0.230105	0.152057	0.109806	242	0.413357	0.463521	0.490536	0.289549	0.428237	0.433977	0.479693	0.389945	0.33137	242	0.635144	0.421754	0.810589	0.682055	0.66957	0.581826	0.651417	0.756732	0.407925	0.774238	0.661123	0.455107	0.522969	0.538196	0.681122	0.565459	0.398249	0.290195	0.36413	0.337355	0.465665	0.658221	0.586776	0.579659	0.628547	0.465665	0.658221	0.408095	0.575523	0.586776
0.18604	0.213807	0.262596	0.0888336	0.186422	0.190388	0.235479	0.164662	0.124024	243	0.431324	0.462392	0.512441	0.29805	0.431767	0.436335	0.485262	0.405786	0.35217	243	0.639413	0.43699	0.812056	0.688208	0.677577	0.582337	0.662154	0.7617	0.425573	0.771249	0.650972	0.443543	0.512912	0.560876	0.689691	0.57706	0.426904	0.321562	0.375419	0.351671	0.480241	0.650362	0.580447	0.573966	0.643213	0.480241	0.650362	0.400459	0.596059	0.580447
0.171741	0.199001	0.250755	0.0794381	0.188337	0.182046	0.221263	0.165496	0.118693	244	0.414416	0.446095	0.500754	0.281848	0.433978	0.426668	0.470386	0.406812	0.344519	244	0.624105	0.408244	0.79924	0.677398	0.662714	0.562617	0.652398	0.749202	0.407464	0.763496	0.641776	0.429646	0.493135	0.543853	0.676205	0.563591	0.410534	0.3067	0.345277	0.323143	0.452745	0.640036	0.57074	0.551371	0.622506	0.452745	0.640036	0.379671	0.581541	0.57074
0.165888	0.203058	0.251851	0.0819353	0.170723	0.17926	0.225375	0.157589	0.115069	245	0.407293	0.450619	0.501847	0.286243	0.413187	0.423392	0.474737	0.396975	0.339218	245	0.625515	0.406732	0.797966	0.673526	0.660171	0.564187	0.644876	0.747689	0.410005	0.764487	0.642456	0.435	0.496857	0.538141	0.678048	0.565845	0.396378	0.309003	0.348604	0.309	0.443477	0.631417	0.580427	0.557264	0.608267	0.443477	0.631417	0.3733	0.571292	0.580427
0.1742	0.201729	0.236229	0.0777705	0.170463	0.176597	0.221571	0.162408	0.112318	246	0.417372	0.449143	0.486034	0.278874	0.412871	0.420235	0.470713	0.402999	0.335138	246	0.628542	0.407232	0.803538	0.67473	0.667548	0.567752	0.641415	0.753859	0.404515	0.763533	0.645704	0.435485	0.494813	0.536967	0.676858	0.559219	0.398882	0.302098	0.341641	0.306978	0.435367	0.636164	0.584412	0.555186	0.606203	0.435367	0.636164	0.376849	0.571224	0.584412
0.168356	0.217533	0.237268	0.085593	0.195936	0.184999	0.220022	0.155061	0.117494	247	0.410312	0.466405	0.487102	0.292563	0.442647	0.430115	0.469065	0.393777	0.342775	247	0.626961	0.409068	0.808322	0.680299	0.671537	0.568536	0.643825	0.754635	0.407597	0.763297	0.6484	0.436697	0.494589	0.535207	0.675896	0.553183	0.396272	0.300223	0.342618	0.305952	0.43648	0.638839	0.589007	0.55728	0.613607	0.43648	0.638839	0.380162	0.576467	0.589007
0.181986	0.212448	0.249452	0.0827905	0.199079	0.184863	0.224563	0.166371	0.124471	248	0.426598	0.460921	0.499452	0.287733	0.446183	0.429957	0.47388	0.407887	0.352804	248	0.638788	0.415871	0.814376	0.698777	0.675549	0.572784	0.648434	0.758442	0.435218	0.753808	0.631309	0.430483	0.509066	0.559772	0.673628	0.572525	0.430412	0.314634	0.350027	0.313213	0.453056	0.623824	0.581381	0.562234	0.622963	0.453056	0.623824	0.396932	0.608906	0.581381
0.168829	0.192634	0.256281	0.077375	0.184657	0.177577	0.217355	0.162209	0.112812	249	0.410888	0.438901	0.506242	0.278164	0.429718	0.421399	0.466213	0.402752	0.335875	249	0.630584	0.399836	0.810443	0.688978	0.675364	0.57388	0.64354	0.751686	0.420208	0.749152	0.616708	0.428515	0.509202	0.55308	0.663324	0.564652	0.419416	0.296089	0.3399	0.299423	0.438023	0.621492	0.574023	0.559627	0.6173	0.438023	0.621492	0.396356	0.604069	0.574023
0.178176	0.198742	0.247816	0.0827889	0.181267	0.183151	0.226788	0.166586	0.114165	250	0.422109	0.445805	0.497811	0.287731	0.425755	0.427962	0.476222	0.40815	0.337884	250	0.635759	0.395986	0.813826	0.694035	0.679188	0.579869	0.646531	0.753827	0.429883	0.751101	0.633341	0.435373	0.51351	0.561134	0.671173	0.56503	0.400455	0.291589	0.343643	0.288542	0.428914	0.630595	0.581069	0.566157	0.623064	0.428914	0.630595	0.406679	0.602214	0.581069
0.170111	0.199798	0.272619	0.0832464	0.174969	0.170704	0.212474	0.156757	0.109876	251	0.412446	0.446988	0.522129	0.288525	0.418293	0.413164	0.460949	0.395926	0.331475	251	0.63687	0.390238	0.809995	0.684993	0.673401	0.572567	0.634562	0.746958	0.429795	0.752602	0.634593	0.433175	0.513302	0.561531	0.671289	0.56247	0.398693	0.285536	0.340674	0.287193	0.428125	0.623681	0.574226	0.560408	0.614804	0.428125	0.623681	0.400259	0.599514	0.574226
0.175641	0.208938	0.258904	0.0850154	0.183171	0.178167	0.23253	0.154842	0.114815	252	0.419095	0.457097	0.508826	0.291574	0.427985	0.422099	0.482214	0.393499	0.338844	252	0.638434	0.395075	0.810537	0.684539	0.679166	0.581769	0.636963	0.74755	0.453014	0.757721	0.641401	0.448025	0.529726	0.566273	0.676242	0.564574	0.428892	0.34301	0.414602	0.307616	0.451763	0.63073	0.593157	0.585002	0.621167	0.451763	0.63073	0.426674	0.604	0.593157
0.181459	0.201018	0.25168	0.0854946	0.180369	0.187247	0.232643	0.173056	0.120082	253	0.42598	0.44835	0.501678	0.292395	0.424699	0.432721	0.482331	0.416	0.346528	253	0.630358	0.378431	0.806308	0.67613	0.676256	0.571832	0.640656	0.742889	0.438306	0.751522	0.633734	0.449538	0.516669	0.569799	0.670364	0.549669	0.41438	0.34754	0.393037	0.309679	0.439459	0.62062	0.594658	0.571744	0.627563	0.439459	0.62062	0.409904	0.607143	0.594658
0.176444	0.204058	0.245017	0.0798449	0.175519	0.193778	0.215185	0.155951	0.114553	254	0.420053	0.451728	0.494991	0.282568	0.41895	0.440202	0.46388	0.394906	0.338457	254	0.639995	0.352994	0.796721	0.664826	0.666999	0.551101	0.615725	0.735081	0.414302	0.743512	0.620803	0.447419	0.501821	0.551836	0.673274	0.534812	0.400153	0.328804	0.375503	0.286176	0.41788	0.61049	0.582689	0.554794	0.608376	0.41788	0.61049	0.393124	0.594594	0.582689
0.178531	0.208705	0.24477	0.0828409	0.173549	0.17951	0.230134	0.149794	0.112166	255	0.422529	0.456842	0.494743	0.287821	0.416592	0.423686	0.479722	0.387033	0.334912	255	0.64166	0.344837	0.79531	0.654527	0.655383	0.553153	0.614398	0.729038	0.407897	0.742557	0.612727	0.437307	0.502644	0.550318	0.669612	0.531167	0.396537	0.323018	0.376587	0.28477	0.413213	0.605968	0.581029	0.556739	0.608175	0.413213	0.605968	0.395232	0.594333	0.581029
0.178898	0.203465	0.243186	0.0833766	0.186002	0.179648	0.2148	0.164917	0.112522	256	0.422963	0.451071	0.493139	0.28875	0.431279	0.423849	0.463465	0.4061	0.335443	256	0.62987	0.346351	0.796591	0.666162	0.662992	0.542652	0.629326	0.731675	0.406661	0.73476	0.612385	0.433857	0.4907	0.567592	0.665899	0.531957	0.399486	0.325871	0.375561	0.290676	0.41455	0.615877	0.587971	0.548934	0.620896	0.41455	0.615877	0.396943	0.597549	0.587971
0.170866	0.211175	0.246717	0.0820883	0.17267	0.187564	0.219676	0.165929	0.10916	257	0.413359	0.459538	0.496706	0.286511	0.415536	0.433087	0.468696	0.407344	0.330394	257	0.619637	0.34704	0.78021	0.652439	0.658728	0.552955	0.618003	0.726526	0.422068	0.741693	0.605788	0.419703	0.484525	0.548668	0.648928	0.547054	0.404554	0.319947	0.371203	0.283344	0.407955	0.60068	0.568964	0.543397	0.595484	0.407955	0.60068	0.406971	0.583617	0.568964
0.175941	0.192508	0.237487	0.0775356	0.179266	0.176101	0.222593	0.163319	0.115014	258	0.419453	0.438757	0.487327	0.278452	0.423398	0.419644	0.471798	0.404128	0.339137	258	0.616206	0.348172	0.777221	0.654517	0.655818	0.55628	0.616555	0.727739	0.418159	0.731864	0.608248	0.399336	0.487976	0.53646	0.651079	0.551087	0.410785	0.314853	0.377607	0.284479	0.412654	0.608363	0.558108	0.55159	0.594631	0.412654	0.608363	0.414653	0.589139	0.558108
0.16685	0.197667	0.258635	0.0804343	0.171177	0.185173	0.215417	0.164765	0.114562	259	0.408472	0.444598	0.508562	0.283609	0.413735	0.430317	0.46413	0.405912	0.33847	259	0.613367	0.351526	0.768459	0.63371	0.662511	0.555019	0.584931	0.705845	0.418301	0.732949	0.614668	0.393114	0.486123	0.540468	0.658879	0.553292	0.418206	0.313351	0.379306	0.288786	0.420771	0.607194	0.549611	0.5467	0.591556	0.420771	0.607194	0.403975	0.580389	0.549611
0.169612	0.215365	0.248312	0.0826924	0.178896	0.173654	0.232795	0.159114	0.114971	260	0.41184	0.464074	0.498309	0.287563	0.422961	0.416718	0.482488	0.398891	0.339074	260	0.613949	0.351861	0.768833	0.632918	0.663882	0.558748	0.585339	0.706842	0.423296	0.734206	0.616717	0.395247	0.492285	0.542293	0.661734	0.549209	0.437907	0.30192	0.404045	0.275371	0.413682	0.609792	0.545796	0.554748	0.587854	0.413682	0.609792	0.419344	0.585687	0.545796
0.164117	0.192837	0.244983	0.0792281	0.167545	0.173208	0.209927	0.154417	0.106881	261	0.405113	0.439133	0.494957	0.281475	0.409323	0.416183	0.458178	0.392959	0.326926	261	0.618689	0.351867	0.76236	0.635573	0.664803	0.553071	0.581514	0.709803	0.4159	0.723457	0.612082	0.402571	0.466587	0.540755	0.655994	0.541526	0.434282	0.303388	0.393291	0.270754	0.409288	0.598553	0.547581	0.540099	0.584211	0.409288	0.598553	0.404062	0.581699	0.547581
0.174196	0.215604	0.240755	0.085659	0.17773	0.184778	0.22452	0.16576	0.114636	262	0.417368	0.464332	0.490667	0.292676	0.421581	0.429858	0.473835	0.407137	0.33858	262	0.622016	0.364985	0.768345	0.642499	0.667625	0.561703	0.589949	0.716649	0.422497	0.723594	0.615512	0.406779	0.472187	0.545067	0.657929	0.552778	0.446027	0.310696	0.407253	0.285898	0.424066	0.609314	0.551099	0.553684	0.59604	0.424066	0.609314	0.412071	0.589334	0.551099
0.170157	0.20037	0.231015	0.0804444	0.182431	0.182981	0.221925	0.152611	0.104876	263	0.412501	0.447628	0.480641	0.283627	0.427119	0.427762	0.471089	0.390655	0.323845	263	0.61074	0.365892	0.76011	0.636467	0.658616	0.553764	0.578586	0.709457	0.429494	0.714249	0.609961	0.379064	0.457195	0.521602	0.642394	0.557646	0.447111	0.310669	0.406972	0.285513	0.425625	0.602938	0.530132	0.53981	0.575238	0.425625	0.602938	0.402216	0.578925	0.530132
0.176378	0.18935	0.23285	0.0768076	0.172575	0.195927	0.226668	0.158542	0.107467	264	0.419974	0.435143	0.482545	0.277142	0.415421	0.442637	0.476097	0.398174	0.327822	264	0.590916	0.389391	0.744466	0.635815	0.658769	0.552889	0.589645	0.715584	0.430332	0.71093	0.59065	0.356045	0.44436	0.505306	0.63005	0.566338	0.483252	0.340089	0.423112	0.300864	0.437588	0.584248	0.51012	0.529518	0.564983	0.437588	0.584248	0.39868	0.596287	0.51012
0.164913	0.202512	0.250911	0.0773552	0.171414	0.18134	0.214902	0.166487	0.11126	265	0.406095	0.450013	0.500911	0.278128	0.414021	0.425841	0.463575	0.408029	0.333557	265	0.596041	0.418786	0.752589	0.640463	0.649486	0.554558	0.588379	0.722464	0.425432	0.704494	0.587339	0.375385	0.435601	0.506565	0.625789	0.578883	0.498435	0.386651	0.449644	0.313317	0.451283	0.589582	0.524844	0.539896	0.565732	0.451283	0.589582	0.408102	0.595999	0.524844
0.170551	0.206603	0.245216	0.0811545	0.186389	0.171842	0.213297	0.168278	0.119257	266	0.412978	0.454536	0.495193	0.284876	0.431728	0.414538	0.461841	0.410217	0.345336	266	0.600131	0.434984	0.754426	0.615212	0.646772	0.540504	0.599562	0.725471	0.423372	0.706252	0.574632	0.366129	0.433245	0.501865	0.624079	0.583048	0.476084	0.37595	0.44213	0.311189	0.451276	0.576466	0.523315	0.534679	0.570277	0.451276	0.576466	0.408701	0.57945	0.523315
0.163318	0.194974	0.234764	0.0734455	0.176671	0.173424	0.214745	0.174688	0.120721	267	0.404126	0.441558	0.484525	0.271008	0.420322	0.416442	0.463406	0.417957	0.34745	267	0.589622	0.426918	0.749237	0.599175	0.644675	0.54413	0.587257	0.720881	0.450089	0.705864	0.52127	0.351124	0.429651	0.461806	0.594654	0.589798	0.423349	0.350215	0.422971	0.276212	0.426851	0.541649	0.514233	0.534743	0.545137	0.426851	0.541649	0.42357	0.55604	0.514233
0.171265	0.200495	0.259351	0.0840419	0.170898	0.175229	0.215855	0.155089	0.106543	268	0.413842	0.447767	0.509265	0.2899	0.413398	0.418604	0.464602	0.393814	0.32641	268	0.591005	0.433183	0.750816	0.601731	0.645581	0.539693	0.605482	0.731849	0.458801	0.707669	0.524146	0.35364	0.436113	0.474347	0.606597	0.590859	0.439631	0.358632	0.440431	0.310726	0.466632	0.548926	0.516813	0.526599	0.574619	0.466632	0.548926	0.434983	0.549024	0.516813
0.170782	0.200329	0.246759	0.0857528	0.177346	0.185333	0.226584	0.154635	0.109683	269	0.413258	0.447581	0.496749	0.292836	0.421125	0.430503	0.476009	0.393236	0.331184	269	0.577571	0.417437	0.746027	0.598349	0.643137	0.537854	0.591686	0.71696	0.427766	0.694857	0.519446	0.3356	0.439046	0.478402	0.60907	0.569888	0.431431	0.359041	0.435324	0.280963	0.43658	0.546591	0.514828	0.528944	0.562577	0.43658	0.546591	0.434272	0.542982	0.514828
0.168957	0.195097	0.240542	0.0756793	0.171697	0.183695	0.224637	0.155955	0.109233	270	0.411044	0.441697	0.490451	0.275099	0.414363	0.428597	0.473958	0.394912	0.330504	270	0.568668	0.407691	0.737224	0.584274	0.60435	0.524581	0.555185	0.680114	0.420574	0.692198	0.511431	0.317979	0.430204	0.465984	0.592999	0.5635	0.422066	0.339757	0.42663	0.271077	0.42076	0.5331	0.489519	0.515873	0.563009	0.42076	0.5331	0.42352	0.540177	0.489519
0.161506	0.194281	0.2368	0.0732129	0.170063	0.17198	0.221079	0.153221	0.109986	271	0.401879	0.440774	0.486621	0.270579	0.412387	0.414704	0.47019	0.391435	0.331642	271	0.536856	0.40771	0.737708	0.574731	0.578277	0.510511	0.551267	0.672771	0.39336	0.657525	0.5102	0.342398	0.434279	0.450573	0.582571	0.563765	0.415142	0.323464	0.418492	0.268655	0.416334	0.525708	0.471746	0.507002	0.560636	0.416334	0.525708	0.421439	0.536309	0.471746
0.164252	0.203272	0.241242	0.080053	0.184388	0.172776	0.214605	0.157221	0.107369	272	0.405281	0.450857	0.491164	0.282936	0.429404	0.415664	0.463255	0.396511	0.327672	272	0.552849	0.400639	0.747413	0.579795	0.57768	0.510258	0.572877	0.680775	0.391977	0.668107	0.516311	0.347848	0.436254	0.467784	0.590189	0.558387	0.415974	0.324546	0.42093	0.26719	0.418927	0.53433	0.477112	0.511886	0.576585	0.418927	0.53433	0.422075	0.542937	0.477112
0.17506	0.201134	0.251016	0.0877113	0.173719	0.176604	0.212495	0.154727	0.107122	273	0.418402	0.44848	0.501015	0.296161	0.416796	0.420243	0.460972	0.393353	0.327294	273	0.551144	0.39997	0.743648	0.584667	0.575305	0.509288	0.571272	0.679357	0.390235	0.655707	0.49969	0.343122	0.436487	0.461751	0.585541	0.558278	0.420151	0.326113	0.422753	0.265632	0.419147	0.524754	0.485624	0.526481	0.570202	0.419147	0.524754	0.437419	0.540727	0.485624
0.173564	0.201843	0.246533	0.0801612	0.177916	0.188434	0.227732	0.163813	0.116318	274	0.416611	0.449269	0.496521	0.283127	0.421801	0.43409	0.477213	0.404738	0.341054	274	0.541279	0.384217	0.734845	0.577518	0.570395	0.521201	0.57181	0.678521	0.378119	0.65011	0.492233	0.334962	0.44163	0.459358	0.582063	0.544462	0.410649	0.317884	0.431911	0.261373	0.413884	0.517005	0.481789	0.556622	0.579462	0.413884	0.517005	0.442846	0.53911	0.481789
0.163443	0.191493	0.247206	0.0764234	0.170753	0.184329	0.210867	0.153408	0.108183	275	0.404281	0.437599	0.497198	0.276448	0.413223	0.429336	0.459203	0.391673	0.328912	275	0.530521	0.37026	0.726792	0.562484	0.552874	0.506536	0.558969	0.664754	0.358846	0.647966	0.471881	0.311299	0.424017	0.454695	0.579494	0.527602	0.399804	0.300354	0.421399	0.239998	0.389972	0.496823	0.460769	0.540556	0.573624	0.389972	0.496823	0.425703	0.517602	0.460769
0.176874	0.195561	0.247749	0.0829126	0.167953	0.179133	0.220112	0.148462	0.107653	276	0.420564	0.442223	0.497744	0.287946	0.409821	0.423241	0.469161	0.385308	0.328105	276	0.535674	0.371199	0.72617	0.55998	0.550881	0.514165	0.561756	0.665133	0.365528	0.657969	0.489701	0.308567	0.435243	0.471608	0.592274	0.527463	0.39928	0.281892	0.432747	0.24873	0.389734	0.522024	0.444915	0.553729	0.592625	0.389734	0.522024	0.442968	0.548918	0.444915
0.177119	0.213024	0.260833	0.0828845	0.175707	0.177774	0.238674	0.165254	0.119535	277	0.420855	0.461545	0.510719	0.287897	0.419175	0.421633	0.488542	0.406515	0.345738	277	0.52775	0.357914	0.713685	0.569495	0.542844	0.512033	0.579869	0.666261	0.357304	0.656253	0.477423	0.295008	0.429085	0.473201	0.582308	0.517381	0.400684	0.272615	0.428832	0.254938	0.385548	0.526705	0.430306	0.551953	0.612506	0.385548	0.526705	0.443933	0.548632	0.430306
0.166888	0.190918	0.250528	0.0795291	0.171895	0.175926	0.22253	0.149069	0.106298	278	0.408519	0.436942	0.500527	0.282009	0.414602	0.419436	0.471731	0.386095	0.326033	278	0.490683	0.311377	0.696167	0.558402	0.530064	0.483922	0.56591	0.648565	0.304059	0.633409	0.454425	0.269237	0.373804	0.430772	0.541031	0.48472	0.37557	0.245516	0.373522	0.205596	0.330017	0.511144	0.413978	0.520119	0.5883	0.330017	0.511144	0.426354	0.537501	0.413978
0.168839	0.211218	0.242055	0.0838214	0.178528	0.18243	0.230932	0.166003	0.11802	279	0.4109	0.459585	0.491991	0.289519	0.422526	0.427119	0.480553	0.407434	0.34354	279	0.490646	0.29819	0.688102	0.550881	0.523858	0.47502	0.570446	0.644599	0.303758	0.637305	0.449004	0.267107	0.36884	0.430069	0.538408	0.466322	0.364538	0.23063	0.360075	0.210778	0.321256	0.489588	0.398721	0.497101	0.592366	0.321256	0.489588	0.42566	0.54134	0.398721
0.163214	0.193888	0.229159	0.0770558	0.167537	0.169374	0.215769	0.162955	0.110758	280	0.403997	0.440328	0.478705	0.277589	0.409312	0.41155	0.464509	0.403677	0.332804	280	0.486088	0.304794	0.686517	0.547695	0.516032	0.467285	0.55998	0.642258	0.322214	0.619312	0.443523	0.239892	0.345747	0.396099	0.516869	0.475237	0.376972	0.23148	0.365296	0.204417	0.329051	0.475355	0.373054	0.47472	0.569652	0.329051	0.475355	0.411393	0.520828	0.373054
0.164204	0.19171	0.251221	0.0744462	0.170607	0.182492	0.221219	0.163248	0.111268	281	0.405221	0.437847	0.501219	0.272848	0.413046	0.427191	0.47034	0.40404	0.333568	281	0.46592	0.311008	0.683412	0.559801	0.500552	0.470408	0.555938	0.633374	0.329569	0.613542	0.435713	0.238129	0.341708	0.389827	0.512789	0.491067	0.383994	0.235748	0.37274	0.226375	0.350854	0.479897	0.370829	0.477045	0.564485	0.350854	0.479897	0.416545	0.524082	0.370829
0.160193	0.20223	0.235362	0.0706352	0.165575	0.164098	0.210133	0.149243	0.100859	282	0.400241	0.4497	0.485141	0.265773	0.406909	0.40509	0.458402	0.38632	0.317583	282	0.465989	0.304345	0.682243	0.555683	0.496472	0.46724	0.553174	0.629914	0.331911	0.61274	0.437485	0.240981	0.343311	0.392117	0.516593	0.489469	0.384409	0.215962	0.366204	0.203306	0.337899	0.474196	0.366689	0.474082	0.564788	0.337899	0.474196	0.419137	0.521393	0.366689
0.184285	0.206574	0.243866	0.0856591	0.182511	0.170426	0.230679	0.170759	0.12134	283	0.429284	0.454504	0.493828	0.292676	0.427213	0.412827	0.480291	0.41323	0.348339	283	0.493872	0.32176	0.698996	0.580217	0.506492	0.469362	0.531618	0.623332	0.354831	0.646765	0.476086	0.266613	0.354175	0.375255	0.515281	0.50097	0.400966	0.225925	0.370088	0.196596	0.340018	0.506183	0.377955	0.474741	0.542411	0.340018	0.506183	0.419298	0.489675	0.377955
0.168517	0.195768	0.249365	0.0787354	0.173135	0.177439	0.222308	0.153129	0.109733	284	0.410508	0.442456	0.499365	0.280598	0.416095	0.421235	0.471495	0.391317	0.33126	284	0.454402	0.296166	0.659098	0.540637	0.504243	0.422639	0.483451	0.578299	0.358222	0.630402	0.455912	0.278048	0.332913	0.331691	0.47646	0.50884	0.406101	0.255365	0.379392	0.171662	0.316406	0.476961	0.395658	0.448059	0.492851	0.316406	0.476961	0.397762	0.447583	0.395658
0.165897	0.202572	0.232882	0.0782345	0.180534	0.171419	0.201435	0.159821	0.103559	285	0.407304	0.45008	0.482578	0.279704	0.424893	0.414028	0.448815	0.399776	0.321805	285	0.463771	0.276629	0.666783	0.523626	0.491589	0.405009	0.499586	0.5831	0.347679	0.636686	0.44676	0.27157	0.322848	0.345696	0.482727	0.487391	0.392655	0.236682	0.364834	0.165351	0.294997	0.458274	0.381182	0.428381	0.509639	0.294997	0.458274	0.386653	0.440638	0.381182
0.174265	0.196439	0.247551	0.0798449	0.170697	0.18816	0.214539	0.155335	0.108631	286	0.41745	0.443215	0.497545	0.282568	0.413155	0.433774	0.463183	0.394126	0.329592	286	0.464415	0.288005	0.668714	0.524987	0.488512	0.437402	0.505974	0.591551	0.36388	0.63477	0.436745	0.266897	0.366357	0.348955	0.493473	0.501439	0.415107	0.241698	0.368652	0.18263	0.304104	0.453501	0.377312	0.46895	0.514975	0.304104	0.453501	0.4425	0.442185	0.377312
0.167837	0.178313	0.235449	0.071601	0.173991	0.166975	0.207551	0.149119	0.0991447	287	0.409679	0.422271	0.485231	0.267584	0.417123	0.408626	0.455577	0.386159	0.314872	287	0.463306	0.272977	0.662258	0.528817	0.462366	0.426396	0.511304	0.586519	0.360544	0.636615	0.442964	0.256378	0.3538	0.356519	0.494191	0.493054	0.414147	0.215794	0.359346	0.18395	0.296019	0.465919	0.353249	0.448137	0.526449	0.296019	0.465919	0.420664	0.456591	0.353249
0.159731	0.203705	0.25228	0.0771862	0.159159	0.16003	0.211269	0.15008	0.101276	288	0.399663	0.451337	0.502275	0.277824	0.398947	0.400037	0.45964	0.387402	0.318238	288	0.483275	0.275318	0.664468	0.517588	0.461277	0.437962	0.514887	0.592242	0.361279	0.643873	0.46533	0.239413	0.343093	0.349221	0.482476	0.490944	0.41843	0.213101	0.359203	0.183459	0.294752	0.468602	0.332291	0.440216	0.515285	0.294752	0.468602	0.431706	0.458739	0.332291
0.171317	0.196741	0.246218	0.0770937	0.17015	0.169202	0.228869	0.162658	0.113046	289	0.413904	0.443555	0.496204	0.277658	0.412492	0.411342	0.478402	0.403309	0.336224	289	0.483339	0.272167	0.661087	0.521214	0.463227	0.436156	0.514672	0.588713	0.332896	0.632824	0.482437	0.25892	0.347872	0.351181	0.481455	0.470274	0.440308	0.229549	0.362208	0.183085	0.300677	0.472077	0.351003	0.445454	0.514271	0.300677	0.472077	0.427062	0.46049	0.351003
0.161904	0.202588	0.241383	0.0781076	0.164875	0.172629	0.225721	0.158999	0.106521	290	0.402373	0.450098	0.491308	0.279477	0.406049	0.415487	0.475101	0.398747	0.326376	290	0.479851	0.251914	0.656281	0.516557	0.470915	0.420371	0.50179	0.574042	0.319625	0.631864	0.480615	0.281095	0.360067	0.358332	0.491835	0.459135	0.432003	0.225663	0.338723	0.160233	0.27529	0.468593	0.35947	0.439967	0.509365	0.27529	0.468593	0.421853	0.456093	0.35947
0.163689	0.194001	0.244454	0.0722789	0.168024	0.179535	0.231618	0.148754	0.106322	291	0.404585	0.440455	0.494423	0.268847	0.409907	0.423716	0.481267	0.385686	0.32607	291	0.478584	0.244621	0.660727	0.513589	0.467427	0.41192	0.498221	0.569559	0.309071	0.618874	0.482243	0.270757	0.33688	0.34135	0.480876	0.440928	0.430417	0.21896	0.329422	0.148934	0.267052	0.460695	0.349295	0.414659	0.494081	0.267052	0.460695	0.422143	0.456058	0.349295
0.152647	0.200101	0.235195	0.0765111	0.164201	0.179801	0.218579	0.161197	0.107373	292	0.390701	0.447327	0.484969	0.276606	0.405218	0.424029	0.467524	0.401494	0.327678	292	0.47698	0.238375	0.662694	0.51205	0.461711	0.398603	0.503039	0.56632	0.308082	0.619678	0.483245	0.271227	0.32213	0.351294	0.482898	0.443038	0.428826	0.208593	0.307452	0.156959	0.262267	0.461983	0.353271	0.420889	0.495751	0.262267	0.461983	0.414505	0.461612	0.353271
0.177437	0.202262	0.234662	0.0800112	0.177232	0.184983	0.21133	0.155437	0.103419	293	0.421232	0.449735	0.48442	0.282862	0.42099	0.430097	0.459706	0.394255	0.321588	293	0.489429	0.237558	0.680936	0.517455	0.470692	0.40971	0.532378	0.58886	0.311003	0.605403	0.485769	0.245011	0.311614	0.326483	0.461064	0.43765	0.4282	0.210764	0.308012	0.153861	0.255912	0.465656	0.325872	0.417588	0.512446	0.255912	0.465656	0.416585	0.464386	0.325872
0.167826	0.203676	0.235535	0.0714026	0.173867	0.170757	0.209542	0.149494	0.104336	294	0.409665	0.451305	0.485319	0.267213	0.416973	0.413228	0.457757	0.386645	0.323011	294	0.46173	0.247586	0.662125	0.489861	0.426804	0.420221	0.526017	0.591246	0.317836	0.58848	0.464826	0.202346	0.312922	0.314163	0.455733	0.44832	0.438004	0.219298	0.306473	0.156702	0.257711	0.448608	0.285596	0.417592	0.506736	0.257711	0.448608	0.415054	0.45802	0.285596
0.161093	0.198988	0.238408	0.0765924	0.166773	0.174017	0.23653	0.161965	0.110036	295	0.401364	0.44608	0.488271	0.276753	0.408378	0.417153	0.486344	0.402449	0.331717	295	0.443305	0.240545	0.67051	0.476346	0.422424	0.426958	0.529932	0.586829	0.29917	0.602927	0.447677	0.206111	0.318342	0.31882	0.449983	0.43499	0.43141	0.198624	0.304845	0.149162	0.248137	0.45468	0.292521	0.416336	0.508313	0.248137	0.45468	0.421281	0.460989	0.292521
0.173791	0.202191	0.235548	0.0751512	0.171241	0.177526	0.215537	0.158548	0.105606	296	0.416882	0.449656	0.485333	0.274137	0.413813	0.421339	0.464259	0.398181	0.32497	296	0.438355	0.24149	0.665984	0.474605	0.4171	0.424037	0.522106	0.580762	0.309117	0.600303	0.448708	0.203973	0.281269	0.287309	0.42386	0.447626	0.437857	0.219187	0.304318	0.132237	0.233431	0.457234	0.298243	0.394254	0.48259	0.233431	0.457234	0.421031	0.449614	0.298243
0.159765	0.187624	0.24326	0.0750133	0.170228	0.16214	0.202997	0.143446	0.0957027	297	0.399706	0.433155	0.493214	0.273886	0.412588	0.402666	0.450552	0.378743	0.309358	297	0.404781	0.245343	0.663751	0.455652	0.388022	0.416383	0.49875	0.560409	0.313513	0.593944	0.435078	0.171403	0.273974	0.265303	0.410495	0.448703	0.439627	0.220521	0.30437	0.132468	0.232708	0.448075	0.284557	0.388532	0.471679	0.232708	0.448075	0.419624	0.442902	0.284557
0.160488	0.189163	0.235307	0.0768363	0.163023	0.185411	0.217463	0.150124	0.103941	298	0.400609	0.434929	0.485084	0.277194	0.403761	0.430593	0.46633	0.387459	0.322399	298	0.401559	0.24218	0.661896	0.452455	0.389913	0.430275	0.507422	0.56686	0.309616	0.592848	0.433113	0.17301	0.27347	0.262459	0.403014	0.443022	0.43306	0.223984	0.324617	0.147197	0.247343	0.441441	0.288989	0.404001	0.480913	0.247343	0.441441	0.439108	0.455333	0.288989
0.15432	0.185942	0.237979	0.0714416	0.16216	0.17285	0.211825	0.15642	0.101229	299	0.392836	0.43121	0.487831	0.267286	0.402692	0.415752	0.460245	0.3955	0.318165	299	0.402915	0.249372	0.657596	0.455046	0.386207	0.427615	0.507083	0.56521	0.324702	0.599924	0.439492	0.173577	0.287299	0.263769	0.410104	0.467544	0.443453	0.243333	0.356048	0.152607	0.268741	0.452084	0.269003	0.420018	0.479119	0.268741	0.452084	0.449186	0.456304	0.269003
0.167382	0.186152	0.237745	0.0756334	0.167228	0.1714	0.225447	0.154956	0.110316	300	0.409124	0.431453	0.487591	0.275015	0.408935	0.414005	0.474812	0.393645	0.332138	300	0.430886	0.273217	0.668953	0.467205	0.40852	0.433424	0.530767	0.585312	0.348865	0.614324	0.452862	0.204104	0.296527	0.298631	0.441251	0.481171	0.453737	0.258224	0.361839	0.173817	0.292037	0.462735	0.287495	0.425386	0.497119	0.292037	0.462735	0.45369	0.469841	0.287495
0.158769	0.192235	0.245393	0.0707498	0.178893	0.169282	0.221939	0.146723	0.101758	301	0.398458	0.438446	0.495372	0.265988	0.422958	0.411439	0.471104	0.383044	0.318995	301	0.435602	0.263181	0.662391	0.460125	0.397091	0.411004	0.517394	0.569482	0.340584	0.617716	0.453133	0.204235	0.301578	0.294638	0.44847	0.470139	0.447017	0.248626	0.343849	0.178289	0.277787	0.456594	0.277526	0.41212	0.484491	0.277787	0.456594	0.445013	0.462201	0.277526
0.165116	0.200318	0.236798	0.0792299	0.170906	0.159621	0.224032	0.15409	0.106329	302	0.406344	0.447569	0.486619	0.281478	0.413407	0.399526	0.47332	0.392543	0.326081	302	0.432367	0.257005	0.663208	0.45504	0.394249	0.402979	0.518138	0.563259	0.332726	0.621582	0.454981	0.206291	0.304727	0.294099	0.453922	0.473901	0.425886	0.241224	0.32558	0.179411	0.271467	0.471274	0.282176	0.420251	0.483538	0.271467	0.471274	0.44411	0.467511	0.282176
0.160459	0.189723	0.248342	0.0769896	0.161898	0.157354	0.218652	0.153015	0.0998113	303	0.400573	0.435572	0.498339	0.27747	0.402365	0.396679	0.467602	0.391172	0.315929	303	0.426966	0.270303	0.658541	0.448926	0.418991	0.399877	0.518003	0.562962	0.35159	0.613679	0.447459	0.238798	0.304237	0.294534	0.458189	0.48824	0.43362	0.258822	0.351188	0.193446	0.295388	0.462035	0.314	0.411012	0.482532	0.295388	0.462035	0.436822	0.465576	0.314
0.165434	0.191925	0.24527	0.0788061	0.169235	0.173342	0.215391	0.164569	0.11121	304	0.406736	0.438093	0.495247	0.280724	0.411382	0.416344	0.464103	0.405671	0.333482	304	0.419768	0.265469	0.656997	0.454063	0.441994	0.395264	0.513491	0.566293	0.343924	0.610149	0.444794	0.244837	0.297665	0.289607	0.454412	0.47537	0.440633	0.291852	0.33785	0.181608	0.297988	0.467714	0.343332	0.399935	0.476177	0.297988	0.467714	0.439824	0.466231	0.343332
0.159739	0.184432	0.230162	0.0716631	0.154095	0.172203	0.210362	0.152189	0.101741	305	0.399674	0.429456	0.479752	0.2677	0.39255	0.414974	0.458652	0.390114	0.318969	305	0.419044	0.258167	0.648816	0.443151	0.42691	0.380059	0.50047	0.555026	0.351405	0.6123	0.437714	0.233081	0.280987	0.291155	0.455007	0.468372	0.428522	0.273287	0.315807	0.171259	0.287286	0.454806	0.321742	0.38251	0.455332	0.287286	0.454806	0.430987	0.451337	0.321742
0.168935	0.183338	0.233144	0.0729749	0.161774	0.182575	0.227505	0.150063	0.104066	306	0.411017	0.42818	0.482849	0.270139	0.402211	0.427288	0.476975	0.387379	0.322593	306	0.421623	0.262685	0.647333	0.455203	0.419146	0.37793	0.496584	0.552113	0.364813	0.61736	0.445524	0.24851	0.276265	0.293127	0.461628	0.481249	0.437304	0.313645	0.2986	0.176141	0.304708	0.467081	0.331984	0.375816	0.453298	0.304708	0.467081	0.429249	0.462645	0.331984
0.166203	0.199195	0.237007	0.0734077	0.160722	0.172615	0.225884	0.149134	0.106836	307	0.40768	0.446312	0.486834	0.270938	0.400902	0.41547	0.475272	0.386178	0.326857	307	0.439087	0.27227	0.644994	0.470665	0.370642	0.349691	0.505468	0.545423	0.366989	0.620743	0.450099	0.25988	0.293223	0.300121	0.468959	0.483254	0.439545	0.324295	0.310633	0.180818	0.308722	0.466969	0.322035	0.369994	0.45102	0.308722	0.466969	0.443685	0.47054	0.322035
0.176297	0.188452	0.238355	0.0773529	0.16899	0.171546	0.216473	0.154146	0.107123	308	0.419878	0.434111	0.488216	0.278124	0.411084	0.414181	0.465267	0.392614	0.327297	308	0.448065	0.285735	0.661116	0.487326	0.350759	0.299338	0.526085	0.545059	0.378443	0.636199	0.467049	0.240115	0.24316	0.324062	0.468238	0.491849	0.446983	0.322351	0.300479	0.195658	0.316689	0.478596	0.312947	0.340828	0.471157	0.316689	0.478596	0.446297	0.480488	0.312947
0.166367	0.190545	0.23957	0.074421	0.174529	0.169432	0.209212	0.15131	0.10385	309	0.407881	0.436514	0.489459	0.272802	0.417767	0.411621	0.457397	0.388986	0.322258	309	0.461434	0.26225	0.644724	0.472627	0.337353	0.267553	0.517691	0.523289	0.338094	0.627656	0.454621	0.272702	0.218239	0.317619	0.462109	0.481877	0.438723	0.265597	0.301566	0.183944	0.302813	0.466287	0.287974	0.32411	0.459659	0.302813	0.466287	0.436304	0.471802	0.287974
0.160955	0.195624	0.237187	0.0744317	0.166182	0.167814	0.219301	0.149991	0.107343	310	0.401192	0.442294	0.487019	0.272822	0.407654	0.409652	0.468296	0.387286	0.327633	310	0.475805	0.286232	0.657169	0.452982	0.358812	0.250071	0.49838	0.514668	0.353994	0.636616	0.453585	0.290711	0.207169	0.309392	0.462359	0.498055	0.438318	0.287871	0.287266	0.176274	0.305028	0.459402	0.31068	0.307138	0.445197	0.305028	0.459402	0.436997	0.464854	0.31068
0.161786	0.188131	0.237711	0.0767902	0.159622	0.166066	0.206931	0.153698	0.107982	311	0.402227	0.43374	0.487556	0.27711	0.399527	0.407512	0.454897	0.392043	0.328607	311	0.468084	0.288811	0.651669	0.449545	0.350923	0.233202	0.497415	0.505345	0.358275	0.629947	0.450526	0.280975	0.186816	0.307599	0.450156	0.492524	0.44406	0.278397	0.278496	0.183396	0.30792	0.453508	0.303582	0.293017	0.441991	0.30792	0.453508	0.427294	0.465257	0.303582
0.159605	0.201784	0.247623	0.0755452	0.167872	0.170055	0.222582	0.155369	0.104997	312	0.399506	0.449204	0.497618	0.274855	0.409722	0.412377	0.471785	0.394169	0.324032	312	0.473076	0.287962	0.653944	0.451312	0.367764	0.271836	0.513221	0.518913	0.35892	0.634993	0.452235	0.289201	0.20407	0.316238	0.455458	0.491729	0.445705	0.280816	0.285218	0.185156	0.304796	0.459731	0.317022	0.32501	0.451095	0.304796	0.459731	0.425407	0.463352	0.317022
0.152775	0.183351	0.248628	0.0694341	0.164669	0.163507	0.204459	0.146178	0.100676	313	0.390864	0.428195	0.498626	0.263504	0.405795	0.40436	0.452171	0.382332	0.317295	313	0.461829	0.277437	0.649399	0.446625	0.363444	0.260933	0.506374	0.511106	0.332339	0.623136	0.437839	0.271908	0.164989	0.292846	0.432016	0.480759	0.441947	0.277378	0.271061	0.179634	0.298518	0.453765	0.311081	0.30966	0.442737	0.298518	0.453765	0.42716	0.467964	0.311081
0.164289	0.186075	0.239852	0.0726275	0.166955	0.172231	0.218845	0.154933	0.10228	314	0.405325	0.431364	0.489747	0.269495	0.408602	0.415007	0.467808	0.393616	0.319812	314	0.441524	0.25087	0.63194	0.409368	0.324378	0.262237	0.464563	0.477232	0.341741	0.623559	0.442177	0.277516	0.163548	0.29808	0.436478	0.488454	0.444704	0.29187	0.280771	0.192959	0.297651	0.454282	0.311966	0.309384	0.442223	0.297651	0.454282	0.424987	0.478603	0.311966
0.154903	0.18789	0.239384	0.0738604	0.167017	0.162934	0.209016	0.144525	0.0992703	315	0.393578	0.433462	0.489269	0.271773	0.408677	0.403651	0.457183	0.380164	0.315072	315	0.443724	0.237427	0.631402	0.399497	0.307064	0.242827	0.452727	0.468415	0.339289	0.623105	0.441945	0.276149	0.16154	0.297349	0.436166	0.479837	0.438077	0.281274	0.269241	0.181487	0.289376	0.450404	0.306052	0.305125	0.438607	0.289376	0.450404	0.416094	0.471443	0.306052
0.153115	0.209075	0.236478	0.0723732	0.174348	0.156881	0.197718	0.143854	0.0975724	316	0.3913	0.457248	0.48629	0.269023	0.41755	0.396082	0.444655	0.379281	0.312366	316	0.441339	0.233642	0.627596	0.38695	0.303357	0.237269	0.450923	0.463026	0.330511	0.620872	0.434803	0.277092	0.162572	0.299025	0.433938	0.461501	0.401349	0.265644	0.247366	0.172397	0.271414	0.448319	0.313318	0.312629	0.445376	0.271414	0.448319	0.434014	0.479675	0.313318
0.162716	0.188259	0.244056	0.0775948	0.176135	0.167025	0.222099	0.155249	0.106094	317	0.40338	0.433888	0.49402	0.278558	0.419685	0.408687	0.471274	0.394016	0.325721	317	0.442655	0.218657	0.618324	0.389026	0.310788	0.233772	0.446297	0.46272	0.349181	0.634228	0.391223	0.273686	0.24102	0.324491	0.437031	0.46693	0.396218	0.221053	0.275932	0.180944	0.262192	0.441404	0.290652	0.338342	0.450783	0.262192	0.441404	0.480925	0.493787	0.290652
0.158183	0.191602	0.244766	0.0742423	0.166055	0.174107	0.213462	0.141884	0.10206	318	0.397722	0.437724	0.494738	0.272474	0.407499	0.417262	0.462019	0.376675	0.319468	318	0.45355	0.191594	0.607145	0.365584	0.30651	0.207254	0.398494	0.444776	0.333449	0.636245	0.387413	0.273381	0.231847	0.287348	0.431088	0.447286	0.373335	0.211098	0.252262	0.164004	0.240533	0.411691	0.284021	0.308006	0.417891	0.240533	0.411691	0.452528	0.465134	0.284021
0.160968	0.189559	0.256991	0.0747641	0.173429	0.167907	0.214306	0.155882	0.101664	319	0.401208	0.435383	0.506943	0.27343	0.416448	0.409765	0.462932	0.394819	0.318847	319	0.452056	0.176207	0.620273	0.37894	0.309063	0.16034	0.392926	0.430865	0.320069	0.629902	0.38526	0.263668	0.207014	0.291993	0.422087	0.425741	0.358404	0.187233	0.237177	0.171742	0.225806	0.423166	0.282659	0.252586	0.412842	0.225806	0.423166	0.409882	0.464247	0.282659
0.159367	0.184837	0.23079	0.0710104	0.166675	0.170782	0.207499	0.158114	0.097408	320	0.399208	0.429927	0.480406	0.266478	0.408259	0.413258	0.45552	0.397635	0.312103	320	0.436277	0.146387	0.610962	0.367303	0.308594	0.154001	0.385208	0.428577	0.298284	0.622332	0.358006	0.243892	0.192594	0.270787	0.398536	0.402978	0.32135	0.177949	0.223179	0.140959	0.212719	0.401638	0.272773	0.241944	0.397904	0.212719	0.401638	0.406015	0.45658	0.272773
0.152878	0.189134	0.225847	0.0671907	0.166998	0.168095	0.214533	0.143139	0.101364	321	0.390997	0.434896	0.475234	0.259212	0.408654	0.409993	0.463178	0.378337	0.318378	321	0.420238	0.140523	0.58706	0.35232	0.290849	0.150565	0.362887	0.421984	0.315003	0.634993	0.361442	0.251516	0.20297	0.282758	0.403092	0.419147	0.329648	0.189183	0.231115	0.15698	0.220323	0.401377	0.277571	0.252411	0.405824	0.220323	0.401377	0.412108	0.446255	0.277571
0.155618	0.187205	0.230536	0.0739013	0.152822	0.177008	0.210097	0.150449	0.104614	322	0.394484	0.432671	0.480141	0.271848	0.390925	0.420723	0.458363	0.387878	0.323441	322	0.42391	0.14479	0.590657	0.355895	0.296534	0.157086	0.366246	0.425173	0.323147	0.652475	0.364334	0.27159	0.219692	0.291175	0.406857	0.417283	0.344328	0.199584	0.241853	0.158056	0.231642	0.419525	0.305563	0.278027	0.409446	0.231642	0.419525	0.412319	0.455767	0.305563
0.161698	0.200641	0.237285	0.073776	0.169556	0.175416	0.219316	0.151081	0.106607	323	0.402117	0.44793	0.487119	0.271617	0.411772	0.418827	0.468312	0.388691	0.326507	323	0.424137	0.148492	0.594875	0.360803	0.291643	0.146773	0.366428	0.425196	0.325534	0.651119	0.370955	0.264995	0.213772	0.289226	0.404273	0.422063	0.344818	0.207981	0.240385	0.160901	0.237824	0.430626	0.288147	0.264922	0.406613	0.237824	0.430626	0.416421	0.464822	0.288147
0.154343	0.190119	0.230651	0.0745624	0.159312	0.162168	0.216188	0.150585	0.100507	324	0.392865	0.436027	0.480261	0.273061	0.399139	0.402701	0.46496	0.388052	0.317028	324	0.400879	0.139109	0.586311	0.335483	0.26636	0.123337	0.353765	0.403756	0.315128	0.64156	0.326898	0.221455	0.175286	0.265624	0.365576	0.418886	0.342218	0.200147	0.237233	0.165085	0.234536	0.417121	0.270901	0.252697	0.401849	0.234536	0.417121	0.415501	0.487995	0.270901
0.152972	0.191452	0.247867	0.0720795	0.160265	0.168361	0.212677	0.144546	0.0989587	325	0.391117	0.437553	0.497863	0.268476	0.400331	0.410318	0.461169	0.380192	0.314577	325	0.402508	0.141991	0.587298	0.329127	0.270794	0.106637	0.352725	0.411141	0.318574	0.637145	0.32361	0.223727	0.1567	0.259606	0.362756	0.425192	0.341916	0.201485	0.237618	0.167083	0.237765	0.415578	0.273596	0.231222	0.395003	0.237765	0.415578	0.415225	0.486236	0.273596
0.14282	0.177827	0.237419	0.065278	0.167522	0.163196	0.205116	0.139	0.0930644	326	0.377915	0.421695	0.487257	0.255495	0.409294	0.403976	0.452898	0.372827	0.305065	326	0.403738	0.141318	0.587832	0.331276	0.27108	0.112387	0.35612	0.413035	0.304443	0.635391	0.325414	0.215154	0.15817	0.266191	0.36254	0.423387	0.345813	0.186548	0.237449	0.17628	0.236351	0.420612	0.271787	0.245596	0.404633	0.236351	0.420612	0.420985	0.490918	0.271787
0.149609	0.181876	0.238459	0.0693344	0.161298	0.168077	0.203296	0.15346	0.101988	327	0.386793	0.426469	0.488322	0.263314	0.40162	0.409972	0.450884	0.391739	0.319355	327	0.423914	0.195424	0.607256	0.364747	0.306421	0.12325	0.358092	0.437518	0.336193	0.647896	0.345802	0.241526	0.166651	0.271765	0.38231	0.462809	0.347285	0.216432	0.249252	0.193912	0.270393	0.444459	0.306165	0.253772	0.406411	0.270393	0.444459	0.433019	0.511056	0.306165
0.1507	0.181434	0.223214	0.0689961	0.157295	0.161409	0.203411	0.139298	0.0913969	328	0.388201	0.425951	0.472455	0.262671	0.396605	0.401757	0.451011	0.373226	0.302319	328	0.417672	0.195716	0.605881	0.365538	0.307098	0.122342	0.362211	0.440119	0.345174	0.649245	0.346869	0.25347	0.174356	0.274084	0.392825	0.465134	0.344504	0.213739	0.259653	0.184136	0.266082	0.444469	0.309043	0.258925	0.406671	0.266082	0.444469	0.438717	0.508311	0.309043
0.159888	0.194029	0.233649	0.0739381	0.164192	0.169478	0.204477	0.143252	0.0932415	329	0.39986	0.440488	0.483373	0.271916	0.405206	0.411677	0.452192	0.378487	0.305355	329	0.42382	0.214478	0.608604	0.37363	0.294751	0.125308	0.361912	0.444673	0.365993	0.65594	0.359613	0.237042	0.177566	0.272839	0.398725	0.502364	0.374998	0.171766	0.254431	0.171124	0.273117	0.462826	0.277607	0.261556	0.399715	0.273117	0.462826	0.438954	0.503011	0.277607
0.152988	0.190776	0.241777	0.0707342	0.179099	0.164324	0.212294	0.151321	0.0995074	330	0.391137	0.436779	0.491708	0.265959	0.423201	0.40537	0.460754	0.389	0.315448	330	0.400908	0.226004	0.606394	0.363607	0.235754	0.0983703	0.368842	0.449205	0.3509	0.635549	0.346295	0.221556	0.190578	0.274399	0.405609	0.512219	0.370962	0.112796	0.20503	0.177213	0.272104	0.453177	0.215417	0.228277	0.406817	0.272104	0.453177	0.427239	0.506714	0.215417
0.165071	0.186916	0.23061	0.0762696	0.16778	0.173354	0.213961	0.155837	0.101762	331	0.40629	0.432338	0.480219	0.27617	0.40961	0.416358	0.462559	0.394762	0.319002	331	0.404389	0.234447	0.608606	0.375815	0.23648	0.09321	0.372663	0.450821	0.353727	0.637757	0.331602	0.21905	0.178065	0.273873	0.402545	0.516413	0.36253	0.113182	0.185956	0.1876	0.271452	0.462959	0.21543	0.220352	0.410212	0.271452	0.462959	0.419356	0.507901	0.21543
0.143691	0.185891	0.229823	0.0720269	0.161485	0.163122	0.223298	0.151857	0.105457	332	0.379066	0.431151	0.479399	0.268378	0.401851	0.403883	0.472544	0.389688	0.324741	332	0.405265	0.247607	0.596823	0.359672	0.221911	0.0793505	0.361443	0.441272	0.364167	0.642534	0.334277	0.233212	0.178857	0.284727	0.404217	0.532576	0.376132	0.139688	0.193372	0.208656	0.281667	0.453193	0.211786	0.212263	0.406722	0.281667	0.453193	0.414277	0.504274	0.211786
0.154233	0.191044	0.241653	0.0733986	0.155442	0.157559	0.210702	0.144715	0.095819	333	0.392725	0.437086	0.491582	0.270922	0.394262	0.396936	0.459023	0.380414	0.309546	333	0.44116	0.268618	0.630514	0.384906	0.245144	0.127372	0.389963	0.495352	0.379032	0.654001	0.344173	0.245263	0.183258	0.292477	0.420589	0.545039	0.386132	0.150857	0.209466	0.220356	0.303176	0.459535	0.223652	0.209952	0.410073	0.303176	0.459535	0.414777	0.505644	0.223652
0.15606	0.194383	0.244202	0.0727579	0.160117	0.167588	0.212326	0.151757	0.102779	334	0.395045	0.440889	0.494168	0.269737	0.400146	0.409375	0.460789	0.38956	0.320591	334	0.449625	0.277326	0.644982	0.420841	0.233219	0.149598	0.399725	0.499134	0.373835	0.653168	0.364638	0.246989	0.187914	0.299933	0.42502	0.542486	0.401776	0.15299	0.212177	0.226471	0.306515	0.488788	0.220327	0.221716	0.419859	0.306515	0.488788	0.431614	0.512884	0.220327
0.154632	0.182322	0.234317	0.0685169	0.1628	0.169191	0.212767	0.150187	0.10365	335	0.393232	0.426992	0.484063	0.261757	0.403484	0.411329	0.461267	0.387539	0.321948	335	0.430199	0.282399	0.6417	0.449867	0.243701	0.173748	0.37637	0.487028	0.349534	0.643008	0.342007	0.227252	0.169011	0.283661	0.406021	0.536727	0.410934	0.147937	0.215778	0.203831	0.287037	0.48665	0.215966	0.222418	0.405818	0.287037	0.48665	0.455211	0.478094	0.215966
0.159319	0.18339	0.226228	0.0689663	0.160064	0.170198	0.200399	0.149697	0.0966041	336	0.399148	0.42824	0.475635	0.262614	0.400079	0.412551	0.44766	0.386907	0.310812	336	0.426502	0.279549	0.639256	0.448209	0.234924	0.161789	0.374814	0.484856	0.347528	0.642804	0.335636	0.224948	0.168325	0.276287	0.402939	0.535535	0.407149	0.140572	0.20872	0.199471	0.281464	0.481879	0.213901	0.221291	0.399968	0.281464	0.481879	0.437268	0.478023	0.213901
0.155961	0.180068	0.238866	0.06924	0.156375	0.169865	0.216193	0.149091	0.0997576	337	0.394919	0.424344	0.488739	0.263135	0.395443	0.412147	0.464965	0.386123	0.315844	337	0.443376	0.287411	0.643388	0.447746	0.207719	0.171316	0.379502	0.503014	0.350532	0.646654	0.339581	0.214645	0.171333	0.285391	0.4186	0.538092	0.411573	0.14736	0.206972	0.206225	0.285397	0.483987	0.207125	0.224667	0.404722	0.285397	0.483987	0.443663	0.478538	0.207125
0.147582	0.179956	0.22556	0.068434	0.15772	0.161403	0.196703	0.138134	0.0944477	338	0.384164	0.424212	0.474932	0.261599	0.39714	0.401749	0.443512	0.371664	0.307323	338	0.451961	0.27915	0.649838	0.434066	0.20064	0.178589	0.351694	0.494704	0.352147	0.651349	0.330838	0.220164	0.185329	0.271737	0.420584	0.533129	0.410788	0.132104	0.193034	0.194334	0.275508	0.467706	0.207168	0.23924	0.37808	0.275508	0.467706	0.429026	0.482849	0.207168
0.146554	0.173109	0.240604	0.0654156	0.157074	0.171639	0.205123	0.133839	0.0914272	339	0.382824	0.416064	0.490514	0.255765	0.396326	0.414294	0.452906	0.36584	0.302369	339	0.457069	0.275446	0.652729	0.43693	0.210845	0.183277	0.35807	0.500144	0.348247	0.653488	0.333654	0.230945	0.193627	0.281463	0.426989	0.532203	0.410823	0.129082	0.187318	0.188098	0.272655	0.468796	0.213028	0.249265	0.385491	0.272655	0.468796	0.438731	0.487779	0.213028
0.165373	0.190639	0.222568	0.0719404	0.170973	0.168849	0.216311	0.159058	0.108042	340	0.406661	0.436622	0.471771	0.268217	0.413489	0.410912	0.465092	0.398821	0.328698	340	0.481057	0.280389	0.665203	0.464327	0.283359	0.158555	0.371194	0.495986	0.360184	0.666329	0.369556	0.315363	0.16772	0.290934	0.423758	0.537481	0.405659	0.104751	0.186618	0.209505	0.279498	0.491266	0.276308	0.226841	0.396135	0.279498	0.491266	0.404009	0.504617	0.276308
0.154212	0.188558	0.230996	0.0712705	0.155609	0.163644	0.21232	0.141089	0.0928035	341	0.392698	0.434233	0.48062	0.266965	0.394473	0.40453	0.460782	0.375619	0.304637	341	0.442252	0.304789	0.648477	0.423292	0.258909	0.130354	0.338917	0.462336	0.36874	0.667517	0.371997	0.29793	0.132356	0.252504	0.400868	0.548108	0.43093	0.117558	0.200916	0.233003	0.31235	0.491192	0.2649	0.20412	0.374646	0.31235	0.491192	0.369552	0.46621	0.2649
0.150695	0.184692	0.239268	0.0714559	0.160105	0.167763	0.211335	0.149535	0.0987619	342	0.388194	0.429759	0.48915	0.267312	0.400132	0.409588	0.459712	0.386698	0.314264	342	0.44046	0.295967	0.646682	0.427441	0.250011	0.128421	0.343446	0.46631	0.349216	0.662706	0.385838	0.279998	0.134024	0.260816	0.410823	0.540757	0.411261	0.121251	0.187251	0.227141	0.300377	0.494147	0.255879	0.199166	0.37994	0.300377	0.494147	0.379405	0.468365	0.255879
0.151368	0.187014	0.226768	0.0718075	0.147748	0.154755	0.210685	0.143991	0.0952734	343	0.38906	0.432451	0.476201	0.267969	0.38438	0.393389	0.459005	0.379461	0.308664	343	0.436978	0.302151	0.648068	0.430571	0.243527	0.131267	0.34569	0.469471	0.327856	0.65887	0.378167	0.27377	0.126167	0.253016	0.402271	0.527645	0.418164	0.0906556	0.192979	0.229033	0.30453	0.491644	0.242495	0.19402	0.374814	0.30453	0.491644	0.380782	0.46867	0.242495
0.159708	0.185977	0.227244	0.0689413	0.162521	0.161221	0.21409	0.158104	0.102985	344	0.399635	0.43125	0.476701	0.262567	0.403139	0.401523	0.462698	0.397622	0.320913	344	0.447906	0.313035	0.657094	0.435978	0.274969	0.11534	0.361923	0.478576	0.341963	0.665255	0.391378	0.312013	0.104253	0.273522	0.41236	0.540438	0.417899	0.114446	0.186082	0.243073	0.31534	0.502602	0.296658	0.164706	0.398833	0.31534	0.502602	0.390524	0.46925	0.296658
0.157531	0.186753	0.233127	0.0684337	0.171207	0.157364	0.2071	0.156993	0.104735	345	0.396901	0.43215	0.482832	0.261598	0.413772	0.396691	0.455082	0.396224	0.323627	345	0.446437	0.335197	0.665839	0.448278	0.288708	0.121846	0.345769	0.475094	0.351817	0.666471	0.391701	0.317036	0.105247	0.264543	0.409732	0.551973	0.440605	0.133146	0.209801	0.259782	0.338535	0.516475	0.30997	0.180694	0.402296	0.338535	0.516475	0.407269	0.460665	0.30997
0.152337	0.188211	0.238339	0.0704045	0.164122	0.154804	0.21076	0.153002	0.0990931	346	0.390304	0.433833	0.488199	0.265338	0.40512	0.393452	0.459086	0.391155	0.314791	346	0.439702	0.332511	0.664508	0.434083	0.2925	0.122126	0.329234	0.458318	0.350531	0.666669	0.382807	0.319437	0.110702	0.253346	0.40091	0.552498	0.443347	0.133678	0.214547	0.258693	0.33932	0.526791	0.308139	0.198725	0.411104	0.33932	0.526791	0.420813	0.438967	0.308139
0.152648	0.189288	0.2435	0.0693665	0.163099	0.163898	0.21066	0.142588	0.0987152	347	0.390702	0.435072	0.493457	0.263375	0.403855	0.404843	0.458977	0.377608	0.31419	347	0.447409	0.328773	0.668117	0.441894	0.312084	0.127957	0.331476	0.462098	0.338241	0.673897	0.402787	0.361163	0.121547	0.25269	0.404467	0.544802	0.428929	0.142126	0.208163	0.245961	0.329738	0.537467	0.337822	0.206004	0.412167	0.329738	0.537467	0.425464	0.435261	0.337822
0.154718	0.181419	0.234693	0.0724713	0.155819	0.161186	0.205482	0.140917	0.0926585	348	0.393343	0.425933	0.484451	0.269205	0.394739	0.40148	0.453301	0.375389	0.304399	348	0.453302	0.310823	0.670226	0.441258	0.324068	0.131612	0.337497	0.464411	0.312395	0.675981	0.395964	0.366993	0.118642	0.259368	0.399984	0.534191	0.411882	0.120704	0.19205	0.241818	0.308249	0.536729	0.343308	0.206578	0.416037	0.308249	0.536729	0.421886	0.439204	0.343308
0.151061	0.182613	0.242477	0.0724336	0.16024	0.155741	0.20704	0.145266	0.096125	349	0.388666	0.427333	0.49242	0.269135	0.4003	0.39464	0.455016	0.381138	0.31004	349	0.469373	0.318865	0.676381	0.434451	0.342578	0.133331	0.339279	0.469903	0.324109	0.687488	0.388336	0.387092	0.12089	0.260346	0.405753	0.538608	0.408659	0.135481	0.19318	0.244504	0.313701	0.530349	0.361348	0.207875	0.419153	0.313701	0.530349	0.421561	0.43937	0.361348
0.151691	0.186706	0.238114	0.0678867	0.161521	0.161332	0.206815	0.145256	0.0982088	350	0.389476	0.432095	0.487969	0.260551	0.401896	0.401661	0.454769	0.381124	0.313383	350	0.468029	0.311924	0.676217	0.424979	0.3449	0.126344	0.333116	0.461755	0.314233	0.685889	0.376323	0.390349	0.111355	0.252398	0.395325	0.526977	0.408555	0.137483	0.202298	0.246392	0.313029	0.522125	0.367725	0.204585	0.415096	0.313029	0.522125	0.434239	0.44523	0.367725
0.159692	0.188614	0.233998	0.072764	0.158943	0.169511	0.209743	0.141363	0.0962991	351	0.399615	0.434298	0.483734	0.269748	0.398677	0.411717	0.457978	0.375983	0.310321	351	0.482426	0.297119	0.682959	0.444318	0.358232	0.142614	0.338582	0.463455	0.298168	0.692731	0.387426	0.399376	0.122564	0.256157	0.393107	0.518846	0.390355	0.129816	0.196715	0.239346	0.300199	0.532659	0.376839	0.214455	0.419105	0.300199	0.532659	0.442507	0.44748	0.376839
0.155076	0.181263	0.214932	0.0679871	0.153378	0.157073	0.198944	0.14528	0.0952348	352	0.393797	0.42575	0.463607	0.260743	0.391635	0.396324	0.446031	0.381156	0.308601	352	0.468923	0.28963	0.67501	0.437217	0.34141	0.1301	0.341956	0.454133	0.292637	0.682797	0.38953	0.389036	0.0999846	0.25132	0.373223	0.514731	0.387363	0.121132	0.187572	0.238106	0.291869	0.525653	0.361701	0.203993	0.422813	0.291869	0.525653	0.420403	0.439328	0.361701
0.158985	0.18559	0.229366	0.071553	0.158481	0.159469	0.210652	0.152654	0.100425	353	0.398729	0.430802	0.478922	0.267494	0.398096	0.399336	0.458969	0.39071	0.3169	353	0.464681	0.307136	0.673255	0.430497	0.33331	0.135914	0.33525	0.445876	0.309543	0.682635	0.394792	0.394127	0.112067	0.25328	0.375107	0.529382	0.404589	0.144291	0.193022	0.258922	0.31649	0.524899	0.362583	0.211847	0.422695	0.31649	0.524899	0.435082	0.447122	0.362583
0.148937	0.170943	0.240761	0.0718539	0.164349	0.164296	0.213067	0.152445	0.0968316	354	0.385924	0.413452	0.490674	0.268056	0.405399	0.405335	0.461592	0.390442	0.311178	354	0.46372	0.309159	0.670408	0.436835	0.342329	0.126947	0.310729	0.431294	0.310457	0.681927	0.401387	0.401201	0.107126	0.235573	0.366286	0.531423	0.403556	0.146285	0.192876	0.258002	0.318375	0.527777	0.368923	0.205264	0.405511	0.318375	0.527777	0.431561	0.431687	0.368923
0.147899	0.180244	0.238301	0.0709575	0.166494	0.166158	0.214134	0.150721	0.0995354	355	0.384577	0.424551	0.488161	0.266379	0.408037	0.407625	0.462747	0.388228	0.315492	355	0.470044	0.316176	0.683507	0.449604	0.352803	0.14953	0.317826	0.442921	0.330139	0.698127	0.422161	0.414278	0.125975	0.255975	0.381355	0.525033	0.394763	0.141441	0.186769	0.242418	0.313768	0.528719	0.373251	0.216943	0.397916	0.313768	0.528719	0.432902	0.422023	0.373251
0.144484	0.186112	0.233217	0.066515	0.153738	0.156615	0.208045	0.149495	0.0948603	356	0.380111	0.431407	0.482925	0.257905	0.392095	0.395746	0.45612	0.386646	0.307994	356	0.467923	0.316776	0.686373	0.451311	0.353068	0.149041	0.316586	0.444356	0.329662	0.695045	0.432092	0.40958	0.133018	0.267641	0.388706	0.517552	0.381467	0.127956	0.174068	0.23017	0.301217	0.515637	0.364291	0.203447	0.383867	0.301217	0.515637	0.426646	0.419847	0.364291
0.157204	0.174725	0.226421	0.0641485	0.161846	0.170284	0.215334	0.153048	0.103834	357	0.396489	0.418001	0.475837	0.253276	0.402301	0.412655	0.464041	0.391214	0.322233	357	0.473586	0.319251	0.687103	0.449946	0.346278	0.150958	0.322035	0.445712	0.320861	0.69749	0.436083	0.414708	0.129181	0.259914	0.386753	0.514905	0.374827	0.116205	0.167917	0.21761	0.290815	0.51604	0.363523	0.203597	0.385522	0.290815	0.51604	0.428512	0.426852	0.363523
0.153006	0.185868	0.228974	0.0647724	0.156574	0.164659	0.204795	0.142948	0.0960426	358	0.39116	0.431125	0.478513	0.254504	0.395695	0.405783	0.452543	0.378085	0.309907	358	0.482887	0.322385	0.701136	0.444297	0.337699	0.137892	0.303663	0.432757	0.320353	0.696522	0.443673	0.424927	0.137667	0.269568	0.406271	0.511328	0.376743	0.117196	0.170328	0.22336	0.300293	0.529054	0.384326	0.220141	0.397498	0.300293	0.529054	0.422536	0.412979	0.384326
0.148214	0.193961	0.239214	0.0749976	0.169159	0.158966	0.208307	0.159408	0.106307	359	0.384985	0.44041	0.489095	0.273857	0.41129	0.398706	0.456406	0.399259	0.326048	359	0.486488	0.334694	0.709183	0.444107	0.33877	0.154666	0.306398	0.434922	0.351909	0.712944	0.440113	0.428525	0.177526	0.275122	0.414479	0.528224	0.378194	0.133578	0.20469	0.23165	0.31681	0.531051	0.397849	0.247383	0.403533	0.31681	0.531051	0.423047	0.413709	0.397849
0.154961	0.184101	0.223506	0.0699711	0.152665	0.159564	0.20274	0.145052	0.0954429	360	0.393651	0.42907	0.472764	0.26452	0.390723	0.399455	0.450266	0.380857	0.308938	360	0.490204	0.339637	0.717967	0.45298	0.341971	0.155658	0.314007	0.450607	0.330466	0.699906	0.411018	0.429963	0.166791	0.229271	0.376001	0.512593	0.363246	0.137172	0.20011	0.203861	0.294253	0.506973	0.399345	0.238708	0.36675	0.294253	0.506973	0.420586	0.374982	0.399345
0.147944	0.180382	0.231412	0.072596	0.156069	0.16422	0.21026	0.148821	0.0942074	361	0.384635	0.424714	0.481053	0.269436	0.395056	0.40524	0.458541	0.385773	0.306932	361	0.489103	0.357049	0.712423	0.460634	0.346741	0.170722	0.311742	0.451789	0.34403	0.695856	0.416971	0.433199	0.178543	0.227187	0.376666	0.517478	0.371252	0.151479	0.217285	0.214071	0.314132	0.509081	0.397504	0.241129	0.361961	0.314132	0.509081	0.427348	0.378946	0.397504
0.147937	0.184234	0.225464	0.0634576	0.156446	0.162268	0.20681	0.141553	0.0913832	362	0.384626	0.429224	0.47483	0.251908	0.395532	0.402826	0.454764	0.376235	0.302297	362	0.486429	0.356019	0.717683	0.459222	0.345321	0.166059	0.311716	0.45163	0.341798	0.697001	0.415598	0.414523	0.177335	0.220581	0.37244	0.516183	0.369327	0.143997	0.212673	0.208483	0.311024	0.50781	0.380896	0.228652	0.346504	0.311024	0.50781	0.424722	0.374909	0.380896
0.15498	0.177768	0.235612	0.0659031	0.159574	0.167752	0.212886	0.150586	0.101142	363	0.393675	0.421625	0.485399	0.256716	0.399467	0.409575	0.461396	0.388054	0.318028	363	0.488892	0.36668	0.722581	0.45162	0.351855	0.171126	0.292575	0.450113	0.349025	0.706266	0.40993	0.41285	0.176286	0.210405	0.372582	0.521684	0.363984	0.156179	0.219806	0.190557	0.311121	0.506382	0.391161	0.235757	0.332947	0.311121	0.506382	0.420109	0.374647	0.391161
0.14936	0.196908	0.228059	0.0758667	0.157235	0.158738	0.20792	0.140297	0.0957138	364	0.386471	0.443743	0.477556	0.275439	0.396529	0.39842	0.455982	0.374563	0.309377	364	0.480037	0.355012	0.722376	0.439625	0.334346	0.157642	0.276705	0.432337	0.360053	0.707274	0.422068	0.429286	0.161081	0.215864	0.38976	0.526852	0.365277	0.156331	0.200365	0.1807	0.305711	0.511942	0.399475	0.229288	0.337821	0.305711	0.511942	0.400498	0.367603	0.399475
0.1474	0.192467	0.228875	0.0671746	0.156108	0.159596	0.194357	0.146631	0.0949507	365	0.383927	0.43871	0.478409	0.259181	0.395105	0.399495	0.44086	0.382924	0.308141	365	0.487577	0.335139	0.734917	0.42397	0.339927	0.15666	0.285341	0.437117	0.348293	0.690552	0.405138	0.43904	0.150566	0.229911	0.382198	0.51612	0.375396	0.133376	0.1924	0.153344	0.266751	0.496392	0.407969	0.221149	0.353461	0.266751	0.496392	0.391708	0.345856	0.407969
0.143418	0.182146	0.223254	0.0682644	0.170413	0.164474	0.215633	0.140918	0.0955594	366	0.378705	0.426786	0.472498	0.261274	0.412811	0.405554	0.464363	0.37539	0.309127	366	0.491409	0.336792	0.736078	0.42573	0.341186	0.149474	0.284506	0.439888	0.350862	0.692371	0.4045	0.434909	0.133079	0.206932	0.377658	0.517416	0.376602	0.134312	0.187274	0.151529	0.268358	0.497693	0.408595	0.212356	0.349556	0.268358	0.497693	0.387424	0.341987	0.408595
0.154474	0.172891	0.213325	0.0666423	0.172804	0.171299	0.21475	0.154381	0.102572	367	0.393032	0.415802	0.461871	0.258152	0.415697	0.413883	0.463411	0.392914	0.320268	367	0.513387	0.357455	0.747969	0.464804	0.361302	0.177947	0.298395	0.459639	0.371662	0.697942	0.411168	0.439555	0.137003	0.21805	0.383763	0.533462	0.413178	0.154355	0.211075	0.164696	0.288451	0.506634	0.413573	0.216464	0.35815	0.288451	0.506634	0.371038	0.35708	0.413573
0.153568	0.182715	0.22584	0.0709725	0.158251	0.162895	0.189261	0.143685	0.0890259	368	0.391877	0.427452	0.475227	0.266407	0.397807	0.403602	0.435041	0.379058	0.298372	368	0.50207	0.360608	0.742289	0.46056	0.348648	0.149853	0.299743	0.455695	0.375821	0.696962	0.430467	0.450054	0.146294	0.216716	0.395714	0.542397	0.474041	0.186139	0.246626	0.190128	0.332319	0.517663	0.414034	0.21067	0.357129	0.332319	0.517663	0.334057	0.31827	0.414034
0.162661	0.182231	0.249122	0.0757521	0.164786	0.176551	0.208511	0.140986	0.0931087	369	0.403312	0.426885	0.499122	0.275231	0.405939	0.42018	0.45663	0.375481	0.305137	369	0.497398	0.364833	0.73791	0.455036	0.343946	0.177048	0.295183	0.447275	0.379754	0.698947	0.423773	0.453341	0.172703	0.242392	0.422794	0.549738	0.47801	0.191027	0.250984	0.194914	0.325946	0.510134	0.41346	0.248864	0.368351	0.325946	0.510134	0.36402	0.308779	0.41346
0.163346	0.187782	0.235971	0.0704024	0.160128	0.150057	0.208594	0.131859	0.0872422	370	0.404161	0.433338	0.485768	0.265334	0.40016	0.387371	0.456721	0.363124	0.295368	370	0.497811	0.329544	0.71243	0.423205	0.309883	0.174789	0.307225	0.451182	0.373135	0.696202	0.412545	0.452037	0.174526	0.249115	0.424916	0.516501	0.448743	0.134494	0.242553	0.198148	0.321651	0.484438	0.366815	0.233357	0.367833	0.321651	0.484438	0.352994	0.305566	0.366815
0.163205	0.169142	0.241668	0.0755143	0.159918	0.154186	0.205429	0.150463	0.0993281	371	0.403987	0.411269	0.491597	0.274799	0.399898	0.392666	0.453242	0.387895	0.315164	371	0.47012	0.319742	0.707123	0.415815	0.339246	0.177661	0.3498	0.48927	0.358262	0.685383	0.392711	0.465921	0.157434	0.271351	0.426466	0.511254	0.444655	0.146414	0.243313	0.216721	0.336663	0.477958	0.382238	0.231765	0.392198	0.336663	0.477958	0.357561	0.329131	0.382238
0.138656	0.175549	0.235538	0.065137	0.157341	0.161973	0.207234	0.135618	0.0933795	372	0.372366	0.418986	0.485323	0.25522	0.396663	0.402458	0.455229	0.368263	0.305581	372	0.506704	0.292194	0.688609	0.396945	0.352483	0.16928	0.326477	0.467754	0.382549	0.732121	0.405772	0.467	0.156374	0.296781	0.455636	0.491657	0.429276	0.151665	0.23502	0.199944	0.320289	0.461003	0.398293	0.224696	0.370213	0.320289	0.461003	0.355142	0.309419	0.398293
0.155666	0.187708	0.232891	0.065839	0.159112	0.157088	0.199469	0.147803	0.0960183	373	0.394545	0.433253	0.482588	0.256591	0.398888	0.396343	0.446619	0.384452	0.309868	373	0.500236	0.301939	0.691529	0.404443	0.352745	0.173774	0.318063	0.470855	0.388874	0.727896	0.413171	0.481129	0.161881	0.309869	0.465765	0.493116	0.425993	0.151704	0.232286	0.214294	0.319049	0.461652	0.396299	0.22483	0.372082	0.319049	0.461652	0.353921	0.323636	0.396299
0.153454	0.186908	0.231526	0.0676793	0.161649	0.162505	0.205955	0.148306	0.0990371	374	0.391733	0.432329	0.481172	0.260152	0.402056	0.403119	0.453822	0.385105	0.314702	374	0.488019	0.2971	0.695175	0.393703	0.353662	0.185205	0.296729	0.458831	0.381192	0.732047	0.401699	0.482758	0.172659	0.289921	0.453559	0.491734	0.421647	0.156291	0.241466	0.188226	0.308544	0.461908	0.396821	0.228415	0.365732	0.308544	0.461908	0.364588	0.305464	0.396821
0.154665	0.177427	0.240231	0.0673701	0.166066	0.166533	0.212764	0.141511	0.0916396	375	0.393275	0.421221	0.490134	0.259557	0.407512	0.408085	0.461264	0.376179	0.30272	375	0.491324	0.296906	0.694939	0.383516	0.356518	0.183834	0.283959	0.444685	0.38043	0.731305	0.388418	0.485152	0.17091	0.273901	0.434675	0.491405	0.418559	0.1564	0.240532	0.181349	0.302085	0.457956	0.397442	0.227431	0.359368	0.302085	0.457956	0.363166	0.287926	0.397442
0.150556	0.176095	0.229794	0.063514	0.142933	0.167675	0.202031	0.132987	0.0879155	376	0.388015	0.419636	0.479368	0.25202	0.378064	0.409482	0.449479	0.364673	0.296505	376	0.504494	0.288165	0.69812	0.37413	0.343194	0.181345	0.26914	0.445492	0.390692	0.734951	0.406995	0.48304	0.189897	0.253823	0.436367	0.493004	0.401482	0.135345	0.23125	0.168697	0.301508	0.462919	0.393008	0.231785	0.346777	0.301508	0.462919	0.353533	0.274214	0.393008
0.149796	0.191368	0.231574	0.069815	0.152783	0.157315	0.207408	0.147528	0.0938658	377	0.387034	0.437456	0.481221	0.264225	0.390874	0.396629	0.455421	0.384094	0.306375	377	0.492506	0.29441	0.702337	0.405694	0.341173	0.198969	0.278342	0.447631	0.381781	0.731527	0.396438	0.478277	0.179801	0.2574	0.435741	0.496499	0.422905	0.136319	0.243985	0.174188	0.303112	0.464892	0.404732	0.236125	0.346499	0.303112	0.464892	0.374326	0.260862	0.404732
0.150073	0.192429	0.23744	0.0717892	0.159326	0.1654	0.203678	0.137639	0.0944031	378	0.387392	0.438668	0.487278	0.267935	0.399156	0.406694	0.451308	0.370997	0.307251	378	0.487341	0.287688	0.699967	0.404662	0.339513	0.194784	0.266992	0.442875	0.380779	0.725186	0.401131	0.483115	0.180098	0.228267	0.429497	0.48639	0.428818	0.151248	0.276767	0.143474	0.310464	0.465295	0.403752	0.230546	0.329276	0.310464	0.465295	0.381524	0.249872	0.403752
0.156867	0.190677	0.234749	0.0759874	0.156017	0.164522	0.203137	0.147299	0.096857	379	0.396065	0.436666	0.484509	0.275658	0.39499	0.405613	0.450707	0.383796	0.311219	379	0.476809	0.274001	0.697606	0.412227	0.336983	0.199479	0.283899	0.44604	0.360047	0.712098	0.369039	0.463531	0.178777	0.234879	0.411971	0.47031	0.399263	0.12921	0.274715	0.143261	0.293242	0.446632	0.387418	0.23241	0.341353	0.293242	0.446632	0.385585	0.283153	0.387418
0.148402	0.169693	0.222752	0.0668513	0.150965	0.160403	0.202322	0.146232	0.0923639	380	0.38523	0.411938	0.471966	0.258556	0.388542	0.400503	0.449802	0.382403	0.303914	380	0.455943	0.26078	0.686726	0.40738	0.323367	0.20685	0.26797	0.428601	0.345698	0.694006	0.359831	0.447925	0.181982	0.213022	0.390457	0.460963	0.395135	0.118059	0.278814	0.131212	0.279803	0.445926	0.37062	0.248535	0.320616	0.279803	0.445926	0.392293	0.277382	0.37062
0.137001	0.188859	0.233425	0.068091	0.152769	0.166077	0.204524	0.144247	0.0968659	381	0.370136	0.434579	0.483141	0.260942	0.390856	0.407525	0.452243	0.379799	0.311233	381	0.467136	0.262574	0.678026	0.416641	0.315155	0.218232	0.269802	0.433842	0.343373	0.698693	0.375798	0.449214	0.197316	0.231956	0.409102	0.443634	0.387489	0.120645	0.276673	0.134911	0.278043	0.481322	0.341619	0.28112	0.333222	0.278043	0.481322	0.411625	0.294981	0.341619
0.153181	0.183099	0.22788	0.0710918	0.150972	0.15585	0.2032	0.143953	0.0914086	382	0.391383	0.4279	0.477368	0.266631	0.388551	0.394778	0.450777	0.379412	0.302338	382	0.50301	0.28638	0.698922	0.429678	0.332431	0.226784	0.285824	0.462207	0.345896	0.699677	0.384534	0.421583	0.199017	0.224821	0.392739	0.449953	0.398435	0.0966007	0.279573	0.136417	0.272793	0.488282	0.321573	0.283335	0.331608	0.272793	0.488282	0.413755	0.298027	0.321573
0.139481	0.167981	0.226157	0.0629713	0.142323	0.158926	0.206447	0.152013	0.0977086	383	0.373472	0.409855	0.47556	0.250941	0.377258	0.398655	0.454364	0.389888	0.312584	383	0.494542	0.286832	0.694545	0.418383	0.341231	0.227757	0.282196	0.465008	0.344913	0.693358	0.380656	0.422063	0.198893	0.217449	0.390099	0.45255	0.392682	0.100823	0.279912	0.136129	0.274114	0.482671	0.329142	0.285821	0.325507	0.274114	0.482671	0.40997	0.290312	0.329142
0.157446	0.17767	0.218015	0.0663407	0.152763	0.152157	0.198479	0.148497	0.100167	384	0.396795	0.421509	0.466921	0.257567	0.390849	0.390073	0.44551	0.385353	0.316492	384	0.498825	0.297653	0.698268	0.414209	0.351673	0.232592	0.30058	0.485456	0.357881	0.698521	0.37423	0.434265	0.204657	0.23683	0.411678	0.46198	0.395067	0.108392	0.278955	0.133374	0.275943	0.481419	0.337104	0.287392	0.334831	0.275943	0.481419	0.421626	0.327684	0.337104
0.1398	0.174966	0.233389	0.0628005	0.161115	0.162584	0.209507	0.136907	0.0900745	385	0.373899	0.41829	0.483103	0.2506	0.401392	0.403217	0.457719	0.370009	0.300124	385	0.499693	0.321406	0.697408	0.413624	0.362225	0.25604	0.283246	0.467273	0.365269	0.696884	0.372899	0.436571	0.21303	0.234204	0.412531	0.470547	0.400399	0.108519	0.277902	0.151172	0.305163	0.479994	0.339269	0.292082	0.32757	0.305163	0.479994	0.424061	0.325131	0.339269
0.14469	0.175363	0.230264	0.0650289	0.150611	0.162818	0.199039	0.131466	0.0883814	386	0.380382	0.418764	0.479858	0.255008	0.388086	0.403507	0.446138	0.362583	0.29729	386	0.500095	0.326718	0.694216	0.424496	0.371294	0.262199	0.277983	0.462416	0.369547	0.700126	0.358005	0.43769	0.206081	0.215089	0.388573	0.480445	0.370225	0.0985516	0.262425	0.131568	0.276635	0.470935	0.346011	0.289124	0.302557	0.276635	0.470935	0.415958	0.348927	0.346011
0.144954	0.176515	0.22778	0.063022	0.147467	0.158407	0.215134	0.1357	0.0913873	387	0.380729	0.420136	0.477263	0.251042	0.384014	0.398004	0.463825	0.368374	0.302303	387	0.498486	0.321322	0.693151	0.422857	0.367721	0.263194	0.278993	0.461226	0.369838	0.699913	0.35885	0.438542	0.207612	0.223179	0.389271	0.478577	0.3727	0.0994907	0.264692	0.152158	0.278753	0.471222	0.344531	0.290976	0.309922	0.278753	0.471222	0.416651	0.355662	0.344531
0.154307	0.194808	0.234869	0.0749861	0.16199	0.153918	0.20544	0.14237	0.0935763	388	0.39282	0.441371	0.484633	0.273836	0.40248	0.392324	0.453255	0.37732	0.305902	388	0.497601	0.313996	0.695064	0.42359	0.350053	0.263484	0.274371	0.457725	0.366209	0.700961	0.361192	0.427929	0.202195	0.223668	0.386426	0.472963	0.373618	0.106805	0.257502	0.158506	0.277205	0.470427	0.331319	0.299535	0.304049	0.277205	0.470427	0.430297	0.353873	0.331319
0.153288	0.185804	0.229631	0.0739242	0.156612	0.171597	0.214807	0.146669	0.0903905	389	0.39152	0.43105	0.479198	0.27189	0.395742	0.414243	0.463473	0.382974	0.30065	389	0.476262	0.302581	0.68134	0.402893	0.363641	0.263459	0.266871	0.452096	0.34722	0.67364	0.325235	0.435498	0.195385	0.211125	0.369058	0.457793	0.357938	0.114579	0.255596	0.151128	0.26895	0.440893	0.330951	0.294671	0.294547	0.26895	0.440893	0.427066	0.346251	0.330951
0.148016	0.17134	0.232866	0.066942	0.155992	0.152607	0.192971	0.13589	0.0865797	390	0.384729	0.413932	0.482562	0.258731	0.394959	0.390649	0.439285	0.368633	0.294244	390	0.456863	0.284886	0.670347	0.400474	0.333098	0.252362	0.25266	0.45591	0.340105	0.659383	0.310928	0.409097	0.167035	0.189064	0.364081	0.45451	0.346792	0.100536	0.241551	0.14015	0.26027	0.430234	0.278931	0.259557	0.267116	0.26027	0.430234	0.420834	0.337152	0.278931
0.145237	0.180404	0.234403	0.0617348	0.160249	0.162586	0.209068	0.14426	0.0966664	391	0.3811	0.42474	0.484152	0.248465	0.400311	0.40322	0.45724	0.379816	0.310912	391	0.457365	0.276595	0.669589	0.405629	0.349116	0.274486	0.271233	0.479592	0.343737	0.664306	0.315462	0.40959	0.168779	0.191111	0.362307	0.447787	0.338655	0.101601	0.257738	0.14499	0.261656	0.428761	0.287566	0.280214	0.278856	0.261656	0.428761	0.443646	0.350545	0.287566
0.149882	0.176286	0.228075	0.0689311	0.155542	0.155703	0.210433	0.139479	0.0917638	392	0.387146	0.419864	0.477572	0.262547	0.394388	0.394592	0.45873	0.373469	0.302925	392	0.457669	0.266753	0.677666	0.382046	0.349034	0.242936	0.257728	0.462573	0.331547	0.673678	0.292517	0.401146	0.146194	0.176618	0.342094	0.448424	0.325224	0.0827005	0.249021	0.134088	0.245433	0.418849	0.299611	0.256414	0.274276	0.245433	0.418849	0.446131	0.342606	0.299611
0.144215	0.183204	0.233849	0.0624371	0.156239	0.166276	0.204557	0.127887	0.0830633	393	0.379756	0.428023	0.48358	0.249874	0.395271	0.407769	0.45228	0.357613	0.288207	393	0.476739	0.272072	0.684966	0.39462	0.376126	0.22428	0.288938	0.476902	0.33783	0.688364	0.314677	0.432393	0.132728	0.218734	0.367093	0.451467	0.329509	0.0974821	0.241911	0.147442	0.251834	0.429519	0.331177	0.231738	0.307683	0.251834	0.429519	0.428708	0.367537	0.331177
0.152126	0.182761	0.231621	0.0663373	0.152602	0.163138	0.212425	0.142161	0.0960413	394	0.390033	0.427505	0.481271	0.25756	0.390642	0.403903	0.460896	0.377042	0.309905	394	0.466103	0.272732	0.673109	0.375692	0.372701	0.211332	0.295166	0.464516	0.322483	0.699973	0.30482	0.415291	0.128783	0.248709	0.38916	0.455187	0.314105	0.074558	0.23412	0.171001	0.262367	0.436478	0.341139	0.235135	0.308544	0.262367	0.436478	0.429222	0.392625	0.341139
0.150631	0.174015	0.243284	0.0675292	0.15701	0.155181	0.210231	0.143515	0.0946501	395	0.388112	0.417151	0.493239	0.259864	0.396244	0.39393	0.458509	0.378834	0.307653	395	0.464254	0.271931	0.672833	0.378113	0.358546	0.207723	0.282021	0.45087	0.318267	0.700153	0.305052	0.402272	0.116811	0.238249	0.374232	0.454301	0.314192	0.0621752	0.228023	0.163373	0.251723	0.437526	0.333874	0.231858	0.301717	0.251723	0.437526	0.429944	0.388099	0.333874
0.151069	0.176531	0.22102	0.0644283	0.154039	0.15254	0.208362	0.1499	0.0999764	396	0.388675	0.420157	0.470128	0.253827	0.392477	0.390564	0.456466	0.387169	0.31619	396	0.469394	0.270463	0.67206	0.365716	0.346479	0.212962	0.289068	0.449655	0.33313	0.705415	0.30206	0.3926	0.134098	0.252847	0.384446	0.456672	0.276332	0.0281234	0.268302	0.217761	0.271862	0.423922	0.31851	0.243538	0.315407	0.271862	0.423922	0.405724	0.366236	0.31851
0.155183	0.181648	0.23301	0.0701246	0.154505	0.162402	0.203779	0.13874	0.0882901	397	0.393933	0.426201	0.482711	0.264811	0.393071	0.402991	0.451419	0.372479	0.297136	397	0.473309	0.274566	0.677398	0.376913	0.340275	0.230499	0.261232	0.440835	0.334922	0.708133	0.311608	0.38764	0.150447	0.238518	0.386874	0.456849	0.27612	0.0281016	0.2661	0.226227	0.28862	0.432688	0.313733	0.258822	0.307407	0.28862	0.432688	0.431953	0.340603	0.313733
0.149833	0.18663	0.228658	0.068888	0.157378	0.165669	0.200416	0.137818	0.0883776	398	0.387082	0.432007	0.478182	0.262465	0.396708	0.407025	0.447678	0.371239	0.297284	398	0.46675	0.27012	0.676199	0.359749	0.320069	0.189406	0.292002	0.465803	0.329723	0.702338	0.300049	0.374722	0.126085	0.251951	0.395633	0.453699	0.265123	0.0119742	0.239843	0.24168	0.301812	0.41292	0.291196	0.210273	0.343674	0.301812	0.41292	0.424469	0.326252	0.291196
0.149578	0.17634	0.218273	0.0627255	0.152975	0.158365	0.193171	0.143597	0.0896252	399	0.386754	0.419929	0.467197	0.250451	0.39112	0.397951	0.439513	0.378942	0.299375	399	0.453132	0.259285	0.664998	0.343537	0.303564	0.189969	0.291407	0.459249	0.300003	0.673576	0.259642	0.339572	0.12441	0.246812	0.377491	0.460869	0.280519	0.00973123	0.241866	0.249103	0.320156	0.410144	0.272159	0.214668	0.350871	0.320156	0.410144	0.427551	0.333392	0.272159
0.139835	0.1671	0.221483	0.063385	0.151771	0.153902	0.20359	0.132918	0.0847327	400	0.373945	0.408779	0.47062	0.251764	0.389578	0.392304	0.451209	0.36458	0.291089	400	0.44849	0.267879	0.669542	0.334665	0.293206	0.199822	0.279077	0.455582	0.304358	0.674632	0.254809	0.334359	0.131891	0.240274	0.374374	0.462303	0.281416	0.0126723	0.233248	0.252066	0.324439	0.407096	0.27093	0.211299	0.348578	0.324439	0.407096	0.442368	0.331818	0.27093
0.155613	0.187521	0.223273	0.0716437	0.160846	0.165567	0.215574	0.140558	0.100832	401	0.394478	0.433037	0.472518	0.267663	0.401056	0.406899	0.4643	0.374911	0.317541	401	0.448024	0.268388	0.669086	0.335513	0.294767	0.200435	0.278088	0.454867	0.308589	0.679847	0.269069	0.342952	0.132176	0.248126	0.378813	0.465915	0.289081	0.0191321	0.231767	0.258917	0.328745	0.413991	0.276199	0.207369	0.359062	0.328745	0.413991	0.431888	0.352289	0.276199
0.151786	0.176629	0.231335	0.0673621	0.146894	0.157452	0.194216	0.146126	0.0873336	402	0.389597	0.420272	0.480973	0.259542	0.383268	0.396803	0.4407	0.382264	0.295523	402	0.42171	0.275491	0.653122	0.304733	0.267764	0.156569	0.2739	0.422817	0.316042	0.660882	0.231998	0.310877	0.0835454	0.241919	0.335024	0.482339	0.288845	0.0372019	0.215866	0.26521	0.344119	0.380127	0.246768	0.152372	0.358774	0.344119	0.380127	0.405589	0.344375	0.246768
0.144645	0.171346	0.219718	0.0646364	0.15307	0.15671	0.191837	0.137689	0.0848925	403	0.380322	0.41394	0.468741	0.254237	0.391242	0.395866	0.437992	0.371065	0.291363	403	0.419398	0.270788	0.646949	0.311918	0.258184	0.154925	0.252978	0.419383	0.327116	0.659312	0.235696	0.306533	0.0620934	0.226012	0.323466	0.477596	0.292107	0.0325902	0.181279	0.242523	0.32669	0.386768	0.237992	0.149213	0.341691	0.32669	0.386768	0.39237	0.349407	0.237992
0.145145	0.184667	0.226406	0.0669251	0.153878	0.155268	0.204554	0.143746	0.0917473	404	0.380979	0.429729	0.475822	0.258699	0.392272	0.39404	0.452276	0.379139	0.302898	404	0.429998	0.282828	0.653991	0.331605	0.269234	0.165367	0.260595	0.425677	0.335973	0.667024	0.259141	0.319356	0.0670755	0.233944	0.328422	0.488216	0.310013	0.0485665	0.181701	0.249521	0.329906	0.410068	0.252346	0.160862	0.349297	0.329906	0.410068	0.400259	0.357498	0.252346
0.146503	0.172926	0.219524	0.0653579	0.157496	0.162879	0.211664	0.135663	0.0902843	405	0.382757	0.415844	0.468534	0.255652	0.396857	0.403582	0.460069	0.368325	0.300473	405	0.442131	0.292098	0.663423	0.348688	0.27219	0.14517	0.2719	0.43326	0.341549	0.667985	0.263582	0.317514	0.045344	0.229945	0.324396	0.493069	0.316815	0.0506173	0.171313	0.253987	0.333726	0.419005	0.252266	0.140311	0.352108	0.333726	0.419005	0.378902	0.362504	0.252266
0.150704	0.176128	0.212272	0.065271	0.152658	0.151969	0.210591	0.143934	0.0912671	406	0.388206	0.419676	0.46073	0.255482	0.390715	0.389832	0.458902	0.379386	0.302105	406	0.437575	0.29213	0.657646	0.336793	0.259982	0.133412	0.277596	0.431625	0.343292	0.667827	0.261557	0.316264	0.040071	0.228391	0.320431	0.497694	0.325782	0.0565393	0.177407	0.251189	0.33489	0.411704	0.241063	0.128528	0.352677	0.33489	0.411704	0.363246	0.365461	0.241063
0.14265	0.178679	0.228675	0.068293	0.151048	0.165124	0.201378	0.13696	0.0925938	407	0.37769	0.422705	0.4782	0.261329	0.388648	0.406354	0.448752	0.370082	0.304292	407	0.431582	0.315148	0.654543	0.324335	0.259592	0.115081	0.262996	0.422049	0.361075	0.664862	0.243	0.326369	0.0304263	0.21626	0.313086	0.513562	0.328053	0.0718101	0.197546	0.265953	0.351735	0.401397	0.241734	0.11812	0.344374	0.351735	0.401397	0.351758	0.359658	0.241734
0.13663	0.16698	0.223071	0.0605977	0.151536	0.160878	0.210757	0.133063	0.0878705	408	0.369635	0.408632	0.472303	0.246166	0.389276	0.401095	0.459083	0.364778	0.29643	408	0.431281	0.314475	0.657694	0.322751	0.259309	0.114457	0.263068	0.420007	0.359301	0.661113	0.236726	0.315659	0.0281987	0.21705	0.30867	0.513191	0.323487	0.0650362	0.196099	0.266438	0.352409	0.394965	0.221841	0.1159	0.347391	0.352409	0.394965	0.351223	0.359275	0.221841
0.146448	0.168529	0.244243	0.068962	0.159733	0.147035	0.213141	0.143854	0.0947736	409	0.382685	0.410522	0.494209	0.262606	0.399667	0.383451	0.461672	0.379281	0.307853	409	0.445345	0.325941	0.665194	0.342537	0.290399	0.130709	0.274772	0.444093	0.368677	0.667655	0.255046	0.342017	0.0424315	0.227761	0.331555	0.520037	0.330865	0.0754873	0.199463	0.274736	0.361896	0.409779	0.247209	0.129214	0.355712	0.361896	0.409779	0.348725	0.372454	0.247209
0.135813	0.170298	0.216804	0.0608731	0.153767	0.15005	0.210967	0.144703	0.0914884	410	0.368528	0.412672	0.465623	0.246725	0.392131	0.387363	0.459311	0.380399	0.302471	410	0.45511	0.319924	0.665441	0.341582	0.304066	0.127806	0.270532	0.442981	0.395121	0.692427	0.290785	0.355654	0.0680209	0.238887	0.358347	0.502549	0.31008	0.102487	0.173125	0.257498	0.339765	0.411593	0.279235	0.119834	0.345698	0.339765	0.411593	0.351658	0.360708	0.279235
0.147343	0.176476	0.216748	0.0680264	0.152478	0.163083	0.207465	0.140068	0.0919239	411	0.383853	0.42009	0.465562	0.260819	0.390484	0.403836	0.455483	0.374256	0.30319	411	0.451414	0.312535	0.661986	0.343882	0.305357	0.139118	0.282042	0.454463	0.405707	0.695127	0.305015	0.347156	0.0705567	0.242704	0.362622	0.506321	0.333454	0.0952182	0.186075	0.270284	0.352113	0.423144	0.274659	0.127678	0.354955	0.352113	0.423144	0.34041	0.351516	0.274659
0.138142	0.175177	0.227299	0.0626898	0.156544	0.152839	0.193481	0.128803	0.0804322	412	0.371674	0.418541	0.476759	0.250379	0.395657	0.390947	0.439865	0.358891	0.283606	412	0.455872	0.343126	0.670367	0.337351	0.302559	0.0870135	0.30786	0.465195	0.424378	0.693798	0.300316	0.343611	0.035254	0.256766	0.367232	0.546735	0.339319	0.123293	0.145665	0.309584	0.387323	0.408897	0.263486	0.0503071	0.390747	0.387323	0.408897	0.319914	0.343374	0.263486
0.147376	0.18072	0.222995	0.0661949	0.14925	0.152705	0.194521	0.131308	0.0841902	413	0.383896	0.425112	0.472224	0.257284	0.386329	0.390775	0.441046	0.362364	0.290155	413	0.460527	0.347164	0.66061	0.33621	0.307074	0.0757589	0.303703	0.443734	0.422305	0.682921	0.284114	0.343677	0.033279	0.264524	0.360158	0.537181	0.32491	0.12345	0.142954	0.317176	0.380234	0.418299	0.248399	0.0719082	0.399556	0.380234	0.418299	0.351977	0.37034	0.248399
0.164287	0.178006	0.222036	0.067775	0.149432	0.152552	0.209289	0.13422	0.0888145	414	0.405323	0.421907	0.471207	0.260336	0.386565	0.39058	0.457481	0.366361	0.298018	414	0.451384	0.344505	0.656403	0.322695	0.300383	0.0821845	0.313481	0.446757	0.423873	0.670509	0.277927	0.340177	0.0442932	0.27951	0.368708	0.529154	0.325301	0.123861	0.14538	0.319323	0.381618	0.389947	0.234855	0.0772911	0.409307	0.381618	0.389947	0.355955	0.370969	0.234855
0.146356	0.178642	0.230995	0.063455	0.155429	0.15919	0.203185	0.140358	0.0927825	415	0.382565	0.422661	0.48062	0.251903	0.394244	0.398986	0.450761	0.374644	0.304602	415	0.439298	0.357919	0.65302	0.337292	0.31554	0.060546	0.341047	0.457646	0.425127	0.658548	0.275341	0.337629	0.0328355	0.284732	0.36389	0.52448	0.320486	0.120434	0.140621	0.319461	0.377732	0.401993	0.249942	0.0856238	0.415412	0.377732	0.401993	0.368397	0.371153	0.249942
0.152082	0.180479	0.239939	0.0656472	0.145107	0.154445	0.196657	0.138693	0.089498	416	0.389977	0.424828	0.489835	0.256217	0.380929	0.392994	0.44346	0.372415	0.299162	416	0.426274	0.350311	0.649937	0.327583	0.300331	0.0551876	0.335264	0.447728	0.416107	0.661066	0.255803	0.350315	0.024552	0.289514	0.361309	0.52337	0.308861	0.11122	0.135137	0.315727	0.368168	0.39648	0.25777	0.0820992	0.41825	0.368168	0.39648	0.364857	0.362646	0.25777
0.147688	0.194811	0.246612	0.0728436	0.159919	0.147584	0.216416	0.148773	0.0942066	417	0.384302	0.441374	0.496601	0.269896	0.399898	0.384167	0.465205	0.38571	0.306931	417	0.411441	0.325647	0.645209	0.338047	0.291938	0.0706132	0.336038	0.435633	0.402943	0.658843	0.264398	0.342538	0.0484983	0.300933	0.369522	0.518294	0.322066	0.0977236	0.159496	0.32459	0.370025	0.402719	0.251412	0.0997095	0.423948	0.370025	0.402719	0.366336	0.36487	0.251412
0.139914	0.169845	0.233408	0.0657544	0.154932	0.158638	0.205388	0.153982	0.0930399	418	0.374051	0.412123	0.483123	0.256426	0.393615	0.398294	0.453198	0.392406	0.305024	418	0.398069	0.307041	0.642899	0.324244	0.301494	0.040087	0.316614	0.42629	0.336387	0.617379	0.212839	0.381552	-0.0415028	0.244193	0.337405	0.470116	0.282538	0.116595	0.093752	0.277859	0.34161	0.364899	0.274479	0.0284291	0.38492	0.34161	0.364899	0.330004	0.332667	0.274479
0.137303	0.176136	0.230517	0.0599473	0.147307	0.154357	0.217889	0.145426	0.0942585	419	0.370544	0.419686	0.480122	0.244841	0.383806	0.392883	0.466786	0.381347	0.307015	419	0.391016	0.308279	0.642059	0.323655	0.301111	0.0363886	0.323299	0.409962	0.342843	0.627023	0.225537	0.39106	0.00118584	0.269028	0.369882	0.46191	0.269961	0.101009	0.093006	0.250049	0.325907	0.360161	0.268273	0.0446197	0.375848	0.325907	0.360161	0.335021	0.317157	0.268273
0.14477	0.186622	0.223813	0.0675853	0.146819	0.15177	0.201614	0.135518	0.0857236	420	0.380486	0.431998	0.473089	0.259972	0.38317	0.389577	0.449015	0.368128	0.292786	420	0.414446	0.326581	0.651016	0.314291	0.31128	0.0403237	0.353883	0.434332	0.345524	0.646716	0.213296	0.390973	-0.0339958	0.280951	0.369417	0.480017	0.26288	0.0984914	0.0588049	0.248701	0.317906	0.350064	0.279675	0.0505738	0.407787	0.317906	0.350064	0.340482	0.303889	0.279675
0.153633	0.168829	0.220468	0.0606694	0.153442	0.155945	0.201879	0.136361	0.0907739	421	0.39196	0.410888	0.469541	0.246312	0.391717	0.394899	0.44931	0.369271	0.301287	421	0.408141	0.32513	0.648127	0.311092	0.308161	0.0351082	0.350531	0.43104	0.347829	0.629707	0.212472	0.392434	-0.0499178	0.283274	0.372396	0.4785	0.256039	0.095086	0.0529435	0.241029	0.311133	0.352181	0.276291	0.0431739	0.411532	0.311133	0.352181	0.34217	0.307444	0.276291
0.14602	0.167524	0.228488	0.0617614	0.150816	0.148861	0.196035	0.139734	0.089003	422	0.382125	0.409297	0.478004	0.248518	0.38835	0.385824	0.442759	0.37381	0.298334	422	0.412992	0.332044	0.667446	0.281964	0.283542	0.0248098	0.352552	0.41562	0.346464	0.628247	0.229863	0.404558	-0.0495015	0.285737	0.372889	0.478634	0.251442	0.0938621	0.0527395	0.240948	0.313063	0.350786	0.276517	0.0439483	0.412364	0.313063	0.350786	0.331426	0.30774	0.276517
0.142153	0.177168	0.228329	0.0627363	0.15714	0.157682	0.210175	0.13941	0.090144	423	0.377031	0.420914	0.477838	0.250472	0.396409	0.397091	0.458449	0.373376	0.30024	423	0.418656	0.325285	0.669596	0.272288	0.274961	0.0294934	0.343596	0.408605	0.352248	0.627224	0.22496	0.383936	-0.0478057	0.280984	0.373474	0.479502	0.241505	0.0854146	0.0574422	0.231122	0.305274	0.348922	0.270832	0.0449577	0.410734	0.305274	0.348922	0.334012	0.304725	0.270832
0.148462	0.181953	0.22534	0.0656767	0.139507	0.15568	0.197589	0.12861	0.0853952	424	0.385308	0.426559	0.4747	0.256275	0.373507	0.394563	0.44451	0.358623	0.292225	424	0.411807	0.309208	0.666319	0.255661	0.245188	0.0274185	0.334016	0.397361	0.343758	0.626858	0.207109	0.369783	-0.0737634	0.274555	0.36375	0.474485	0.236666	0.0941255	0.0322423	0.229458	0.30137	0.344004	0.260665	0.0373425	0.407834	0.30137	0.344004	0.302851	0.300222	0.260665
0.141137	0.175982	0.228553	0.0655332	0.158006	0.157026	0.21066	0.140366	0.0872077	425	0.375682	0.419502	0.478072	0.255994	0.3975	0.396265	0.458977	0.374654	0.29531	425	0.394171	0.300399	0.656869	0.277356	0.229437	0.0279234	0.349954	0.397449	0.335826	0.616253	0.234882	0.354702	-0.0739988	0.301186	0.366633	0.470692	0.241009	0.0885276	0.0337317	0.239656	0.300442	0.357944	0.250397	0.0396166	0.428104	0.300442	0.357944	0.299742	0.286108	0.250397
0.146254	0.175319	0.223115	0.0621161	0.151126	0.156201	0.19444	0.136203	0.0859976	426	0.382431	0.418711	0.472351	0.249231	0.38875	0.395223	0.440954	0.369056	0.293254	426	0.403919	0.30469	0.662673	0.264793	0.253987	-0.00496684	0.372438	0.394675	0.330753	0.614033	0.211573	0.355596	-0.110603	0.305751	0.363584	0.466132	0.222438	0.0857754	0.00614252	0.239179	0.29723	0.336114	0.251324	0.00252168	0.431226	0.29723	0.336114	0.275626	0.264205	0.251324
0.135431	0.168575	0.212917	0.0585181	0.151156	0.149394	0.201818	0.138442	0.0839003	427	0.368009	0.410579	0.461429	0.241905	0.388788	0.386515	0.449242	0.372078	0.289656	427	0.396267	0.310078	0.672007	0.253729	0.260786	-0.00322384	0.349653	0.38896	0.330092	0.613462	0.202447	0.348628	-0.105925	0.29932	0.361854	0.470586	0.219252	0.0911272	0.00628972	0.22928	0.295768	0.331945	0.264339	9.10142e-05	0.410788	0.295768	0.331945	0.282546	0.260933	0.264339
0.150645	0.169529	0.223226	0.0651025	0.154537	0.154022	0.202449	0.141236	0.088646	428	0.38813	0.411739	0.472468	0.255152	0.393112	0.392456	0.449943	0.375814	0.297735	428	0.399633	0.307256	0.669713	0.233613	0.257297	0.000421182	0.345033	0.378421	0.332926	0.616784	0.192035	0.347042	-0.106148	0.296613	0.358737	0.467649	0.223685	0.0931638	0.0106725	0.23509	0.294912	0.331231	0.265908	0.00403574	0.41527	0.294912	0.331231	0.27433	0.259346	0.265908
0.144063	0.171576	0.20509	0.0591779	0.146244	0.167029	0.204234	0.143356	0.0896651	429	0.379557	0.414218	0.452869	0.243265	0.382419	0.408692	0.451923	0.378624	0.299441	429	0.401793	0.304073	0.662243	0.210969	0.245776	-0.0109027	0.32946	0.366823	0.332352	0.61794	0.190138	0.345977	-0.108266	0.294455	0.356905	0.471008	0.218741	0.0889889	0.00651281	0.248499	0.305415	0.317782	0.256991	-0.00422866	0.413976	0.305415	0.317782	0.268857	0.243776	0.256991
0.158097	0.177378	0.244427	0.0732594	0.15811	0.143113	0.190258	0.146944	0.0945729	430	0.397614	0.421162	0.494396	0.270665	0.39763	0.378303	0.436186	0.383333	0.307527	430	0.398203	0.325626	0.663093	0.208433	0.231074	-0.0169513	0.32084	0.358198	0.343054	0.610261	0.18263	0.342287	-0.117666	0.286523	0.346047	0.481677	0.242809	0.146042	0.0480038	0.289129	0.347145	0.335135	0.278701	0.0300314	0.430348	0.347145	0.335135	0.287349	0.248594	0.278701
0.144476	0.1721	0.210312	0.0633595	0.149327	0.156948	0.207586	0.134649	0.08965	431	0.3801	0.414849	0.458598	0.251713	0.386428	0.396167	0.455616	0.366945	0.299416	431	0.367018	0.251941	0.620796	0.149491	0.264914	0.0164874	0.252183	0.298602	0.316339	0.600613	0.161779	0.351229	-0.0950992	0.2795	0.335254	0.417509	0.192299	0.172857	0.0905961	0.242795	0.302246	0.284166	0.322179	0.0773302	0.378922	0.302246	0.284166	0.324504	0.227839	0.322179
0.142566	0.17046	0.21981	0.0618605	0.148247	0.142611	0.200708	0.127594	0.0878248	432	0.377579	0.412868	0.468839	0.248718	0.385028	0.377639	0.448004	0.357203	0.296353	432	0.363223	0.268405	0.616291	0.145736	0.255052	0.000134187	0.249652	0.289468	0.327147	0.604963	0.175951	0.346866	-0.11458	0.268471	0.328148	0.430423	0.203072	0.193283	0.107379	0.245193	0.32255	0.294886	0.316448	0.0567752	0.367799	0.32255	0.294886	0.299459	0.213495	0.316448
0.134198	0.165719	0.219158	0.0593044	0.148879	0.152701	0.198641	0.13527	0.0832494	433	0.36633	0.407086	0.468143	0.243525	0.385848	0.39077	0.445691	0.367791	0.28853	433	0.360599	0.269595	0.616375	0.139967	0.258252	-0.0098637	0.259195	0.276884	0.326967	0.603115	0.173308	0.350995	-0.114435	0.275297	0.323065	0.431399	0.201752	0.191631	0.0998106	0.24705	0.316357	0.290606	0.315266	0.0443435	0.373393	0.316357	0.290606	0.298968	0.221742	0.315266
0.133028	0.171102	0.220887	0.0594758	0.141427	0.161644	0.197204	0.13576	0.0884074	434	0.36473	0.413645	0.469986	0.243877	0.376068	0.40205	0.444076	0.368456	0.297334	434	0.360133	0.268176	0.61522	0.142747	0.264191	-0.00536464	0.262293	0.278131	0.324908	0.602466	0.172564	0.353468	-0.108814	0.277118	0.324056	0.431098	0.206471	0.193553	0.0903771	0.243124	0.310222	0.293784	0.319948	0.0441934	0.374107	0.310222	0.293784	0.280446	0.213852	0.319948
0.134993	0.180502	0.219441	0.0639034	0.137481	0.151377	0.193391	0.145278	0.0918183	435	0.367413	0.424855	0.468445	0.252791	0.370785	0.389071	0.439762	0.381154	0.303015	435	0.36749	0.280892	0.615942	0.148582	0.271829	-0.000174512	0.272281	0.288589	0.32465	0.606448	0.177059	0.34384	-0.107152	0.276718	0.32015	0.435065	0.215896	0.176838	0.0957123	0.248845	0.308347	0.295885	0.32605	0.0465326	0.37818	0.308347	0.295885	0.283449	0.220851	0.32605
0.153135	0.177454	0.230514	0.0663429	0.16226	0.158777	0.199885	0.150787	0.0975745	436	0.391325	0.421253	0.480118	0.257571	0.402815	0.398468	0.447085	0.388313	0.312369	436	0.392305	0.284929	0.636279	0.156609	0.273322	0.0242733	0.27699	0.302729	0.333481	0.5983	0.211225	0.338246	-0.0826934	0.24413	0.294482	0.435601	0.22092	0.176901	0.10299	0.249922	0.31333	0.324642	0.313473	0.0943987	0.346283	0.31333	0.324642	0.291648	0.240386	0.313473
0.133444	0.168028	0.226191	0.0629661	0.150947	0.16041	0.205192	0.134808	0.0830142	437	0.3653	0.409913	0.475595	0.250931	0.388519	0.400512	0.452981	0.367163	0.288122	437	0.37701	0.275533	0.628615	0.0909882	0.250872	0.00748832	0.249714	0.258371	0.328565	0.592325	0.171194	0.325375	-0.0961509	0.228992	0.268579	0.433578	0.185085	0.167262	0.0867547	0.24989	0.296905	0.286993	0.30043	0.0795861	0.336296	0.296905	0.286993	0.295087	0.170361	0.30043
0.138784	0.172288	0.227392	0.0608371	0.160003	0.155863	0.194104	0.150686	0.0919811	438	0.372538	0.415076	0.476857	0.246652	0.400004	0.394795	0.440573	0.388182	0.303284	438	0.378902	0.285153	0.634029	0.101215	0.272639	0.0159025	0.252196	0.258877	0.330661	0.596596	0.178998	0.333147	-0.0919416	0.233784	0.272094	0.430829	0.179802	0.154366	0.0806273	0.251318	0.300445	0.292882	0.298254	0.0808545	0.342254	0.300445	0.292882	0.292801	0.177277	0.298254
0.142343	0.171744	0.231003	0.0641737	0.152343	0.150377	0.200456	0.134195	0.0870865	439	0.377283	0.414421	0.480628	0.253325	0.390311	0.387784	0.447723	0.366326	0.295104	439	0.373375	0.28052	0.627538	0.101921	0.271259	0.0237236	0.258632	0.26963	0.325029	0.598391	0.160714	0.325246	-0.0911607	0.217453	0.251903	0.432872	0.155024	0.140891	0.0834544	0.229103	0.277032	0.298895	0.299296	0.0781989	0.351204	0.277032	0.298895	0.318397	0.110954	0.299296
0.133559	0.162897	0.22709	0.0593558	0.140332	0.131005	0.211942	0.134404	0.0909039	440	0.365457	0.403605	0.47654	0.24363	0.374609	0.361946	0.460372	0.366611	0.301503	440	0.331401	0.24804	0.624362	0.0873943	0.265606	0.041215	0.251947	0.255965	0.327009	0.57747	0.151127	0.316721	-0.110182	0.215691	0.246534	0.41292	0.13436	0.131639	0.0659411	0.229087	0.267193	0.284872	0.295166	0.0807819	0.350286	0.267193	0.284872	0.312736	0.109637	0.295166
0.151781	0.161727	0.228034	0.0614177	0.144703	0.156956	0.208843	0.144817	0.0908924	441	0.389591	0.402153	0.477529	0.247826	0.380398	0.396177	0.456993	0.380549	0.301484	441	0.3425	0.270591	0.627663	0.08985	0.245762	0.0612412	0.269062	0.288367	0.351097	0.581113	0.155149	0.295597	-0.0911148	0.238558	0.282117	0.425546	0.148005	0.159047	0.0496931	0.242846	0.265796	0.28703	0.290223	0.0917384	0.359201	0.265796	0.28703	0.332162	0.118476	0.290223
0.144097	0.167995	0.237282	0.0648006	0.145891	0.16268	0.19835	0.138849	0.0878362	442	0.3796	0.409872	0.487116	0.25456	0.381957	0.403336	0.445365	0.372625	0.296372	442	0.372793	0.246867	0.637012	0.0876886	0.216653	0.0263503	0.232864	0.255115	0.368601	0.583807	0.158247	0.311998	-0.0810182	0.264245	0.306764	0.415163	0.148607	0.133328	0.0240446	0.236187	0.261298	0.285493	0.289746	0.0888481	0.353289	0.261298	0.285493	0.331909	0.118852	0.289746
0.143128	0.180182	0.207523	0.0648807	0.147631	0.161807	0.1995	0.136953	0.0874385	443	0.378323	0.424479	0.455547	0.254717	0.384228	0.402252	0.446655	0.370071	0.2957	443	0.36705	0.231112	0.636659	0.0963714	0.197167	0.0273067	0.233165	0.256181	0.373701	0.576678	0.151861	0.316524	-0.0819775	0.258205	0.298844	0.399021	0.147759	0.0733757	0.0224973	0.221949	0.244322	0.295255	0.26598	0.090091	0.353773	0.244322	0.295255	0.33169	0.12796	0.26598
0.137944	0.16635	0.220087	0.0576878	0.153784	0.138232	0.2104	0.129382	0.0853851	444	0.371408	0.407861	0.469134	0.240183	0.392153	0.371796	0.458693	0.359698	0.292207	444	0.357773	0.258311	0.636275	0.0876586	0.180286	0.0340815	0.227577	0.251419	0.422061	0.563848	0.138764	0.276992	-0.086333	0.2491	0.283995	0.439949	0.156959	0.11821	0.0405348	0.235225	0.270225	0.28294	0.239877	0.0998112	0.345695	0.270225	0.28294	0.326426	0.123095	0.239877
0.136316	0.17216	0.216164	0.0600817	0.137574	0.148231	0.193406	0.137068	0.0848597	445	0.36921	0.414922	0.464935	0.245116	0.37091	0.385008	0.439779	0.370227	0.291307	445	0.369062	0.236565	0.64829	0.0907668	0.20382	0.0506571	0.237991	0.271487	0.401173	0.574427	0.144355	0.29467	-0.0697757	0.257452	0.301207	0.404663	0.149664	0.100105	0.019989	0.223904	0.239059	0.302369	0.259855	0.140127	0.352655	0.239059	0.302369	0.304795	0.138053	0.259855
0.145602	0.174062	0.223724	0.0609303	0.147605	0.158255	0.191968	0.134053	0.0823785	446	0.381578	0.417207	0.472994	0.246841	0.384194	0.397813	0.438141	0.366133	0.287016	446	0.368283	0.230398	0.643958	0.0889247	0.203113	0.0508343	0.240327	0.269225	0.432643	0.586601	0.195623	0.315855	-0.0177112	0.254954	0.323815	0.422194	0.208322	0.143453	0.0834599	0.228835	0.28285	0.325814	0.27733	0.167631	0.355604	0.28285	0.325814	0.347317	0.15235	0.27733
0.139635	0.160993	0.226094	0.0593631	0.139161	0.142176	0.197252	0.134868	0.0858991	447	0.373678	0.401239	0.475493	0.243645	0.373043	0.377062	0.44413	0.367244	0.293086	447	0.355644	0.221937	0.63926	0.0785404	0.178568	0.061441	0.239365	0.271226	0.428386	0.590223	0.191541	0.302702	-0.0112487	0.250969	0.318051	0.421537	0.205096	0.132853	0.0881899	0.226313	0.27929	0.330348	0.286876	0.163365	0.346494	0.27929	0.330348	0.351192	0.148169	0.286876
0.136972	0.168054	0.232663	0.0620755	0.149898	0.146627	0.199565	0.136483	0.0872875	448	0.370098	0.409944	0.482352	0.249149	0.387166	0.382919	0.446727	0.369436	0.295445	448	0.344035	0.21462	0.639991	0.0868569	0.191637	0.0758457	0.24753	0.279264	0.442749	0.583388	0.179459	0.283601	-0.0257828	0.240715	0.309599	0.425369	0.213215	0.138738	0.0841166	0.219397	0.267627	0.330863	0.287904	0.166317	0.348953	0.267627	0.330863	0.355526	0.155893	0.287904
0.134783	0.162754	0.218353	0.0584782	0.154058	0.144594	0.202651	0.139546	0.0878516	449	0.367128	0.403428	0.467283	0.241823	0.392502	0.380256	0.450168	0.373558	0.296398	449	0.350188	0.220058	0.644967	0.0966158	0.189465	0.0656575	0.259097	0.291031	0.445716	0.586583	0.18441	0.281261	-0.0351254	0.248907	0.316464	0.421509	0.195291	0.139815	0.0770039	0.210085	0.251029	0.332546	0.28546	0.15382	0.354838	0.251029	0.332546	0.341817	0.160627	0.28546
0.148685	0.180257	0.219862	0.0652436	0.144276	0.160689	0.192435	0.133994	0.0852966	450	0.385596	0.424567	0.468894	0.255428	0.379837	0.400861	0.438674	0.366052	0.292056	450	0.34769	0.216414	0.644384	0.107644	0.185786	0.066338	0.266487	0.298981	0.447278	0.582207	0.19811	0.281398	-0.0279687	0.25806	0.327155	0.411699	0.190037	0.147777	0.0860282	0.207808	0.249979	0.35016	0.277735	0.150771	0.363447	0.249979	0.35016	0.327749	0.141508	0.277735
0.131749	0.164667	0.229079	0.0599525	0.14094	0.148681	0.197075	0.136042	0.0875717	451	0.362973	0.405792	0.478622	0.244852	0.37542	0.385591	0.443931	0.368839	0.295925	451	0.309452	0.209638	0.635536	0.109587	0.147994	0.0853424	0.270757	0.294747	0.454924	0.549828	0.189195	0.229656	-0.0237314	0.246264	0.309688	0.400565	0.183815	0.139565	0.0817537	0.199436	0.242289	0.356753	0.255603	0.172306	0.371533	0.242289	0.356753	0.334795	0.147711	0.255603
0.146319	0.168733	0.225279	0.0657167	0.145533	0.153811	0.212165	0.144425	0.0959571	452	0.382517	0.410772	0.474636	0.256353	0.381488	0.392188	0.460614	0.380032	0.309769	452	0.329676	0.239911	0.646079	0.137705	0.172942	0.0936866	0.261983	0.297251	0.472606	0.561257	0.223903	0.253017	-0.011961	0.227518	0.297769	0.413433	0.207847	0.145715	0.0874879	0.183386	0.220502	0.375476	0.271047	0.178292	0.356847	0.220502	0.375476	0.338875	0.128819	0.271047
0.148067	0.17185	0.217136	0.0640591	0.141341	0.142112	0.194513	0.135289	0.0860575	453	0.384795	0.414548	0.465979	0.253099	0.375953	0.376977	0.441036	0.367817	0.293356	453	0.341783	0.222389	0.64574	0.138407	0.154539	0.0805548	0.262726	0.282382	0.464053	0.57407	0.227396	0.24878	-0.00299892	0.249099	0.316129	0.39377	0.203322	0.132066	0.0650194	0.158257	0.192368	0.376336	0.251532	0.167926	0.362003	0.192368	0.376336	0.340345	0.13091	0.251532
0.137944	0.167927	0.224992	0.0615761	0.141673	0.148697	0.20144	0.142913	0.0894456	454	0.371408	0.409789	0.474333	0.248145	0.376395	0.385613	0.44882	0.378038	0.299075	454	0.334323	0.226932	0.639723	0.149643	0.17534	0.0862145	0.261336	0.268983	0.455897	0.567282	0.241044	0.26998	-0.0062329	0.2596	0.300301	0.396787	0.203403	0.13248	0.064767	0.158601	0.193414	0.385607	0.266941	0.170989	0.362283	0.193414	0.385607	0.336867	0.138541	0.266941
0.133913	0.172136	0.220974	0.0574485	0.143969	0.148829	0.192196	0.135847	0.0847683	455	0.365941	0.414893	0.470079	0.239684	0.379432	0.385784	0.438401	0.368574	0.29115	455	0.323192	0.236886	0.644687	0.138124	0.171594	0.0659777	0.256625	0.270948	0.446639	0.556987	0.24479	0.268776	-0.00184627	0.258237	0.296957	0.4005	0.197494	0.126123	0.0442132	0.139115	0.179734	0.376089	0.262328	0.151981	0.354548	0.179734	0.376089	0.344691	0.145686	0.262328
0.145437	0.16705	0.224256	0.0649793	0.142954	0.156974	0.196174	0.130061	0.0853426	456	0.381362	0.408718	0.473557	0.25491	0.378092	0.396199	0.442916	0.360639	0.292135	456	0.330239	0.239543	0.642711	0.136478	0.167451	0.063254	0.25814	0.269746	0.447858	0.570491	0.231359	0.240543	0.00566665	0.243554	0.274768	0.410217	0.17568	0.0898144	0.0494116	0.120424	0.15105	0.36375	0.242474	0.149031	0.350176	0.15105	0.36375	0.340563	0.158617	0.242474
0.146386	0.172302	0.231188	0.0640479	0.146095	0.141725	0.200593	0.134757	0.0860382	457	0.382604	0.415093	0.480821	0.253077	0.382224	0.376463	0.447876	0.367093	0.293323	457	0.330696	0.223943	0.635313	0.129894	0.144176	0.0645966	0.270611	0.262858	0.446634	0.57235	0.22883	0.241002	0.00578818	0.241353	0.273704	0.393063	0.182905	0.0681917	0.0512759	0.10969	0.138182	0.352041	0.222317	0.150451	0.368374	0.138182	0.352041	0.339488	0.132224	0.222317
0.140488	0.173943	0.227695	0.060845	0.145919	0.144653	0.196369	0.139645	0.0858909	458	0.374818	0.417065	0.477173	0.246668	0.381993	0.380333	0.443136	0.373691	0.293071	458	0.316799	0.197011	0.626566	0.120876	0.158287	0.0566957	0.263912	0.246788	0.432833	0.568142	0.239836	0.258036	-0.00354117	0.24992	0.278728	0.377017	0.17225	0.0826285	0.0423812	0.100116	0.117894	0.352106	0.237492	0.14312	0.368886	0.117894	0.352106	0.327169	0.149491	0.237492
0.138561	0.1578	0.210415	0.0580686	0.148981	0.148527	0.188884	0.13587	0.0845619	459	0.372238	0.397241	0.45871	0.240974	0.38598	0.385392	0.434608	0.368605	0.290795	459	0.313218	0.188597	0.631608	0.120071	0.171029	0.0480111	0.258724	0.231786	0.421016	0.567406	0.23604	0.265491	-0.00613475	0.237111	0.26471	0.372335	0.166412	0.0864263	0.0429598	0.0817146	0.102748	0.350987	0.25343	0.127832	0.366935	0.102748	0.350987	0.324273	0.144544	0.25343
0.140543	0.176344	0.218033	0.0649493	0.147292	0.150544	0.200377	0.137422	0.0874842	460	0.37489	0.419933	0.46694	0.254851	0.383786	0.387999	0.447635	0.370704	0.295777	460	0.320862	0.193333	0.634506	0.112024	0.167003	0.0523394	0.251623	0.226964	0.414071	0.566741	0.249283	0.274517	-0.0198757	0.247472	0.276593	0.37003	0.17165	0.0903361	0.0326468	0.0863584	0.108627	0.349445	0.254784	0.123664	0.366361	0.108627	0.349445	0.33864	0.170768	0.254784
0.138153	0.169152	0.214637	0.0643286	0.146255	0.148567	0.192644	0.136347	0.0840944	461	0.37169	0.411281	0.46329	0.253631	0.382433	0.385443	0.438912	0.369252	0.28999	461	0.308404	0.190047	0.63087	0.105774	0.161319	0.0494979	0.245511	0.218734	0.426222	0.555136	0.244708	0.260217	-0.033066	0.236325	0.257721	0.375065	0.17553	0.0881374	0.0280433	0.0877573	0.1087	0.344009	0.243633	0.115884	0.35754	0.1087	0.344009	0.333776	0.165427	0.243633
0.143773	0.179847	0.226866	0.0653157	0.153507	0.142093	0.208786	0.138259	0.0891854	462	0.379174	0.424084	0.476304	0.255569	0.3918	0.376952	0.456931	0.371831	0.298639	462	0.316148	0.172718	0.63815	0.099073	0.165041	0.06714	0.239942	0.221056	0.40552	0.559398	0.235326	0.262208	-0.011303	0.228193	0.258334	0.360121	0.181443	0.080862	0.00470506	0.0927879	0.102928	0.331555	0.243109	0.142005	0.344992	0.102928	0.331555	0.32914	0.161576	0.243109
0.136956	0.171359	0.215785	0.0611332	0.154184	0.148401	0.198437	0.147198	0.0894786	463	0.370076	0.413956	0.464527	0.247251	0.392663	0.385229	0.445462	0.383664	0.29913	463	0.27922	0.151252	0.631765	0.0688826	0.161163	0.0425008	0.223815	0.190986	0.391109	0.523523	0.212354	0.299692	-0.0419508	0.211539	0.23644	0.338468	0.164876	0.0975988	-0.0146109	0.0799877	0.08456	0.301061	0.245389	0.113083	0.328033	0.08456	0.301061	0.312592	0.146834	0.245389
0.146643	0.16179	0.217477	0.0615976	0.143648	0.144151	0.207331	0.136449	0.084641	464	0.38294	0.402231	0.466344	0.248189	0.37901	0.379672	0.455336	0.36939	0.290931	464	0.279394	0.152199	0.629671	0.0683622	0.161125	0.0420977	0.228215	0.192317	0.39488	0.519678	0.197464	0.296446	-0.0446037	0.19233	0.221553	0.345287	0.176783	0.101748	-0.014641	0.0957865	0.0978866	0.30294	0.246483	0.110697	0.334509	0.0978866	0.30294	0.312692	0.109778	0.246483
0.139278	0.169042	0.240166	0.0614493	0.159793	0.145976	0.20083	0.13093	0.0814444	465	0.3732	0.411148	0.490067	0.24789	0.399741	0.382068	0.44814	0.361842	0.285385	465	0.298381	0.156432	0.628993	0.0720998	0.172865	0.0150494	0.211057	0.178476	0.398735	0.525957	0.206531	0.30083	-0.037845	0.193911	0.226152	0.346082	0.183807	0.108278	-0.0169098	0.091033	0.0962572	0.301761	0.249325	0.101486	0.328146	0.0962572	0.301761	0.307211	0.0979795	0.249325
0.140976	0.154327	0.222139	0.0610728	0.147549	0.151622	0.213797	0.139096	0.0861869	466	0.375468	0.392845	0.471317	0.247129	0.384121	0.389387	0.462382	0.372955	0.293576	466	0.292943	0.142796	0.617552	0.0515768	0.172607	0.0116038	0.209328	0.176652	0.402516	0.526854	0.204114	0.299289	-0.0415865	0.197768	0.228413	0.348413	0.106587	0.109198	-0.0376046	0.100509	0.101284	0.311527	0.245298	0.0973029	0.333763	0.101284	0.311527	0.300216	0.111685	0.245298
0.129138	0.161969	0.213487	0.0584889	0.142021	0.146337	0.19465	0.133725	0.0841527	467	0.359358	0.402454	0.462047	0.241845	0.376856	0.38254	0.441191	0.365685	0.290091	467	0.324425	0.139527	0.630134	0.0994336	0.119737	-0.0216441	0.213094	0.178575	0.42784	0.55089	0.23904	0.30696	-0.00317334	0.23522	0.262574	0.345043	0.103696	0.0931998	-0.0608291	0.0921893	0.0935825	0.342131	0.199141	0.0742441	0.33925	0.0935825	0.342131	0.257306	0.120826	0.199141
0.133065	0.180057	0.234716	0.0638105	0.145442	0.152027	0.206892	0.129563	0.0851261	468	0.364781	0.424332	0.484475	0.252607	0.381369	0.389906	0.454853	0.359948	0.291764	468	0.325803	0.118995	0.63106	0.120012	0.12664	-0.0190878	0.230372	0.204723	0.409401	0.550149	0.250526	0.310707	0.000133895	0.245535	0.277305	0.33882	0.0677148	0.0865736	-0.0700952	0.075613	0.0669691	0.336753	0.200002	0.0745097	0.33997	0.0669691	0.336753	0.264141	0.143865	0.200002
0.141737	0.162524	0.223104	0.0596612	0.149669	0.14676	0.200301	0.122969	0.0739656	469	0.37648	0.403142	0.472339	0.244256	0.386871	0.383093	0.44755	0.35067	0.271966	469	0.351601	0.142142	0.64302	0.124757	0.137874	-0.0104714	0.2296	0.214125	0.369739	0.537623	0.243293	0.296579	-0.0363126	0.259024	0.263921	0.331188	0.0554512	0.0764385	-0.108755	0.0840238	0.0528444	0.331499	0.205051	0.0596537	0.342474	0.0528444	0.331499	0.25854	0.145633	0.205051
0.134808	0.166948	0.222023	0.065447	0.152085	0.147952	0.195976	0.131877	0.0842668	470	0.367162	0.408592	0.471193	0.255826	0.389981	0.384645	0.442692	0.363149	0.290287	470	0.361661	0.129402	0.645879	0.1156	0.140515	-0.013047	0.241561	0.237372	0.356607	0.537511	0.260177	0.311772	-0.0197785	0.228192	0.25524	0.327443	0.0384592	0.0686069	-0.117973	0.104007	0.0723029	0.334597	0.209023	0.061913	0.341376	0.0723029	0.334597	0.256844	0.160033	0.209023
0.134282	0.176962	0.219867	0.0617251	0.143558	0.150457	0.192443	0.13662	0.0812896	471	0.366445	0.420669	0.4689	0.248445	0.378891	0.387888	0.438683	0.369621	0.285113	471	0.371892	0.143937	0.662747	0.123947	0.141193	0.000864246	0.241266	0.246421	0.378339	0.537756	0.261001	0.303034	0.0157604	0.222694	0.267525	0.320999	0.0302025	0.0638057	-0.0891579	0.10197	0.0802826	0.312731	0.20315	0.0709173	0.344235	0.0802826	0.312731	0.265212	0.159462	0.20315
0.139171	0.168079	0.218737	0.0611624	0.150776	0.152688	0.205724	0.129909	0.0815929	472	0.373056	0.409975	0.467693	0.24731	0.388299	0.390753	0.453568	0.360429	0.285645	472	0.347817	0.186305	0.684111	0.139472	0.16758	-0.000736628	0.255144	0.268517	0.348867	0.50054	0.249452	0.277344	0.0271661	0.199195	0.255553	0.344139	0.0413368	0.0789301	-0.0849543	0.108654	0.101276	0.318322	0.214544	0.0741219	0.34541	0.101276	0.318322	0.267209	0.160794	0.214544
0.146246	0.162981	0.220089	0.0633468	0.145582	0.141369	0.198763	0.131491	0.0831878	473	0.382422	0.403708	0.469136	0.251688	0.381552	0.375991	0.445828	0.362616	0.288423	473	0.342878	0.175631	0.676004	0.125802	0.164538	-0.0143236	0.257696	0.264807	0.348273	0.499127	0.245013	0.268926	0.0220742	0.199511	0.255654	0.347414	0.0449222	0.0638586	-0.0794259	0.105281	0.104493	0.315735	0.200898	0.071271	0.344579	0.104493	0.315735	0.256964	0.162536	0.200898
0.140619	0.1717	0.212644	0.0627053	0.147796	0.149998	0.199327	0.143861	0.0885466	474	0.374992	0.414367	0.461134	0.25041	0.384443	0.387296	0.44646	0.37929	0.297568	474	0.353297	0.166171	0.667197	0.113123	0.178638	-0.0210424	0.259029	0.257976	0.356836	0.510091	0.25448	0.272177	0.0345592	0.205445	0.261275	0.347545	0.0549171	0.0768907	-0.060171	0.115093	0.107859	0.313599	0.215059	0.0756714	0.349677	0.107859	0.313599	0.267953	0.170577	0.215059
0.133662	0.160087	0.220059	0.0609021	0.147288	0.14506	0.199979	0.136739	0.0874495	475	0.365598	0.400109	0.469104	0.246784	0.383781	0.380868	0.44719	0.369783	0.295719	475	0.340686	0.173564	0.642764	0.102061	0.178477	-0.0195665	0.245182	0.247	0.362998	0.504878	0.244381	0.253922	0.0240057	0.183201	0.241834	0.345882	0.0604022	0.0856149	-0.0547653	0.129917	0.120646	0.302713	0.181413	0.0558146	0.328089	0.120646	0.302713	0.262176	0.148966	0.181413
0.134259	0.157002	0.216816	0.0594273	0.142218	0.150709	0.192988	0.142221	0.0858242	476	0.366414	0.396235	0.465635	0.243777	0.377118	0.388213	0.439304	0.377122	0.292958	476	0.336508	0.184024	0.633137	0.105	0.181336	-0.0251507	0.249923	0.252261	0.369074	0.511862	0.254956	0.255336	0.0280871	0.193468	0.259543	0.339718	0.0539646	0.0871987	-0.0617138	0.124906	0.111069	0.297788	0.180009	0.0539667	0.32268	0.111069	0.297788	0.257595	0.138541	0.180009
0.134571	0.177997	0.216573	0.06225	0.139176	0.146796	0.191657	0.138694	0.0880862	477	0.36684	0.421897	0.465374	0.249499	0.373063	0.383139	0.437786	0.372416	0.296793	477	0.335355	0.185703	0.633567	0.106028	0.189065	-0.0282136	0.248736	0.246869	0.373862	0.518716	0.260431	0.270992	0.0232299	0.227993	0.28207	0.339903	0.0538797	0.0879644	-0.0619696	0.120467	0.106303	0.297585	0.180064	0.0540966	0.320744	0.106303	0.297585	0.258421	0.134047	0.180064
0.141771	0.16756	0.206205	0.0627023	0.144999	0.14655	0.18701	0.143104	0.0842031	478	0.376525	0.409341	0.454098	0.250404	0.380788	0.382819	0.432447	0.378291	0.290178	478	0.34583	0.193772	0.639606	0.113101	0.196673	-0.0321293	0.257333	0.256444	0.365726	0.503848	0.267398	0.261056	0.0393099	0.197935	0.24718	0.358568	0.0886042	0.127182	-0.0726327	0.1367	0.114562	0.316015	0.196324	0.0532819	0.317266	0.114562	0.316015	0.245273	0.15105	0.196324
0.134941	0.173711	0.226074	0.0623323	0.135391	0.147623	0.197372	0.129129	0.082515	479	0.367344	0.416787	0.475473	0.249664	0.367955	0.384218	0.444266	0.359345	0.287254	479	0.342454	0.251543	0.655022	0.103984	0.190242	0.0159286	0.224055	0.267132	0.37716	0.494972	0.264426	0.259632	0.0523139	0.188769	0.246152	0.416277	0.0985391	0.13153	-0.0567427	0.16393	0.153566	0.301026	0.188439	0.104696	0.279477	0.153566	0.301026	0.255254	0.137789	0.188439
0.13803	0.170566	0.22012	0.0597277	0.144313	0.146275	0.193477	0.134978	0.087087	480	0.371524	0.412996	0.469169	0.244392	0.379886	0.382459	0.43986	0.367394	0.295105	480	0.346114	0.257114	0.659783	0.102568	0.191426	0.0139736	0.218156	0.266252	0.35845	0.48112	0.284713	0.253783	0.0509479	0.196002	0.240491	0.411166	0.110701	0.126299	-0.0635311	0.159342	0.143943	0.309022	0.185092	0.0979693	0.269909	0.143943	0.309022	0.259155	0.139337	0.185092
0.136573	0.164051	0.224089	0.0524017	0.136388	0.154693	0.19074	0.131235	0.0791592	481	0.369558	0.405032	0.473381	0.228914	0.369308	0.393311	0.436738	0.362263	0.281352	481	0.331319	0.254707	0.661361	0.0941713	0.196108	0.0117165	0.217533	0.263363	0.350836	0.469476	0.283849	0.24157	0.0595481	0.182205	0.221035	0.40971	0.106033	0.12512	-0.0618106	0.154549	0.134632	0.302022	0.18916	0.0956612	0.270138	0.134632	0.302022	0.263941	0.131628	0.18916
0.136656	0.163093	0.209555	0.0585463	0.141861	0.155447	0.197545	0.133969	0.0849721	482	0.369669	0.403847	0.457772	0.241963	0.376645	0.394268	0.44446	0.366018	0.2915	482	0.333288	0.252086	0.676182	0.0854437	0.196635	0.012584	0.218919	0.266374	0.341196	0.495116	0.228845	0.253448	0.0519668	0.188992	0.228836	0.434835	0.118263	0.104084	-0.0522783	0.151758	0.137603	0.251887	0.235865	0.0776197	0.283492	0.137603	0.251887	0.259954	0.120687	0.235865
0.135117	0.169561	0.220265	0.0599081	0.154595	0.143319	0.199531	0.133811	0.0833181	483	0.367583	0.411777	0.469324	0.244761	0.393186	0.378575	0.446689	0.365801	0.288649	483	0.331327	0.254792	0.676609	0.0850098	0.192679	0.012939	0.211359	0.263633	0.32594	0.487587	0.223709	0.241721	0.0588563	0.152108	0.218934	0.435768	0.120076	0.124381	-0.0516738	0.161122	0.151108	0.251854	0.237954	0.0783434	0.277797	0.151108	0.251854	0.259625	0.118282	0.237954
0.136262	0.163591	0.212991	0.058876	0.14955	0.147523	0.200196	0.137933	0.0869435	484	0.369137	0.404464	0.46151	0.242644	0.386717	0.384087	0.447433	0.371393	0.294862	484	0.333894	0.256769	0.676391	0.0857431	0.19623	0.0116707	0.210408	0.263894	0.32498	0.497094	0.202743	0.261543	0.0488085	0.139048	0.207831	0.436556	0.105777	0.1309	-0.0565592	0.15509	0.145225	0.244608	0.250838	0.0724472	0.270206	0.145225	0.244608	0.256271	0.105086	0.250838
0.13537	0.168124	0.222025	0.0626136	0.1484	0.151006	0.193372	0.131389	0.0795035	485	0.367927	0.410029	0.471195	0.250227	0.385228	0.388595	0.439741	0.362476	0.281964	485	0.337448	0.261966	0.67242	0.0883777	0.196886	0.00450296	0.209674	0.26488	0.340673	0.511793	0.221015	0.265856	0.0304674	0.142423	0.214147	0.453386	0.128147	0.138098	-0.0716284	0.162112	0.155643	0.261846	0.253738	0.0474806	0.268551	0.155643	0.261846	0.233611	0.0851387	0.253738
0.142771	0.178936	0.232837	0.0671849	0.141371	0.155431	0.197906	0.127232	0.0797247	486	0.37785	0.423008	0.482532	0.2592	0.375994	0.394248	0.444866	0.356697	0.282356	486	0.333103	0.259917	0.676469	0.0600613	0.193466	-0.0055979	0.212647	0.235697	0.336392	0.507464	0.211791	0.260119	0.0332388	0.140649	0.213412	0.446221	0.114054	0.127407	-0.0682918	0.160086	0.155254	0.235835	0.241253	0.0486004	0.26862	0.155254	0.235835	0.247988	0.07483	0.241253
0.143892	0.169669	0.214392	0.0624438	0.146501	0.14613	0.200826	0.131087	0.086059	487	0.379332	0.411909	0.463025	0.249888	0.382755	0.382269	0.448136	0.362059	0.293358	487	0.313207	0.211989	0.665645	0.0586128	0.172971	-0.00801747	0.2239	0.240935	0.280704	0.473959	0.214971	0.222452	0.0287699	0.158829	0.22298	0.403244	0.111804	0.073265	-0.0766108	0.168318	0.152764	0.240153	0.200166	0.0441892	0.290372	0.152764	0.240153	0.247765	0.0756218	0.200166
0.147196	0.173703	0.217814	0.065722	0.149632	0.140975	0.203928	0.133457	0.0866803	488	0.383661	0.416777	0.466705	0.256363	0.386823	0.375467	0.451584	0.365318	0.294415	488	0.342319	0.192649	0.673127	0.0634329	0.254361	-0.0194776	0.247996	0.260932	0.266449	0.487086	0.217719	0.274685	0.0206981	0.178554	0.240455	0.391314	0.109032	0.0500518	-0.0756784	0.160633	0.144207	0.239782	0.246381	0.0345919	0.305622	0.144207	0.239782	0.241819	0.0824595	0.246381
0.135854	0.170362	0.21922	0.0634754	0.14904	0.136534	0.195773	0.136164	0.0830222	489	0.368584	0.412749	0.468209	0.251943	0.386057	0.369505	0.442462	0.369004	0.288136	489	0.318078	0.181789	0.652407	0.0324222	0.269531	-0.0432719	0.236706	0.229158	0.276552	0.473341	0.202057	0.289783	0.00137734	0.159224	0.228193	0.411511	0.123558	0.0685276	-0.0812374	0.117099	0.191294	0.220752	0.268002	0.00881279	0.280363	0.191294	0.220752	0.227304	0.0639376	0.268002
0.13201	0.17146	0.227476	0.0616419	0.143513	0.152895	0.194196	0.13497	0.0834256	490	0.363332	0.414077	0.476945	0.248278	0.378831	0.391018	0.440676	0.367382	0.288835	490	0.30326	0.188672	0.656304	0.0231	0.258499	-0.0451019	0.224898	0.222409	0.246953	0.457415	0.195758	0.322952	0.00590727	0.160061	0.225779	0.405348	0.103947	0.0515712	-0.0842595	0.0929292	0.176397	0.199447	0.287646	0.00948753	0.26266	0.176397	0.199447	0.2321	0.0542905	0.287646
0.130154	0.169914	0.222353	0.0601921	0.142698	0.142797	0.195176	0.130731	0.0780573	491	0.360769	0.412207	0.471543	0.245341	0.377754	0.377885	0.441787	0.361568	0.279387	491	0.312669	0.199216	0.665517	0.0285741	0.26669	-0.0385253	0.231446	0.228476	0.23009	0.451277	0.196104	0.304782	0.0247516	0.15233	0.217005	0.395031	0.0987503	0.0239434	-0.0704339	0.0789713	0.163229	0.201928	0.270953	0.0303683	0.258246	0.163229	0.201928	0.258626	0.0589064	0.270953
0.150618	0.175575	0.220526	0.0677808	0.14103	0.15509	0.188115	0.133621	0.0828417	492	0.388095	0.419017	0.469602	0.260347	0.375539	0.393815	0.433723	0.365542	0.287822	492	0.310077	0.207362	0.675023	0.0325558	0.257771	-0.044212	0.2247	0.218464	0.219868	0.435538	0.18892	0.317795	0.036437	0.163578	0.233607	0.389626	0.094406	0.0260716	-0.0686658	0.0776688	0.169339	0.199612	0.26595	0.0277463	0.250705	0.169339	0.199612	0.25792	0.0564995	0.26595
0.129389	0.156421	0.216913	0.056125	0.138459	0.133697	0.201908	0.123014	0.0782628	493	0.359707	0.395501	0.46574	0.236907	0.372101	0.365646	0.449342	0.350733	0.279755	493	0.262324	0.186716	0.63623	0.0302317	0.216515	-0.0177377	0.199901	0.195384	0.22433	0.410959	0.180928	0.289046	0.0709756	0.177815	0.240116	0.3968	0.08507	0.0137355	-0.0478787	0.103812	0.185393	0.19491	0.223058	0.0734054	0.262907	0.185393	0.19491	0.256533	0.0426349	0.223058
0.151854	0.168336	0.226329	0.0615743	0.143036	0.151055	0.196017	0.13735	0.083441	494	0.389684	0.410288	0.475741	0.248142	0.378201	0.388658	0.442738	0.370608	0.288862	494	0.243632	0.190874	0.624996	0.029985	0.205415	-0.0131003	0.191917	0.193422	0.23659	0.443156	0.244364	0.304287	0.00397231	0.186322	0.230721	0.402856	0.0979657	0.0279561	-0.0622169	0.113551	0.187702	0.230957	0.238842	0.0344387	0.270418	0.187702	0.230957	0.198168	0.0595445	0.238842
0.129085	0.163848	0.216698	0.0596194	0.143802	0.148977	0.193149	0.137388	0.0849677	495	0.359285	0.404782	0.465509	0.244171	0.379212	0.385975	0.439488	0.370659	0.291492	495	0.247189	0.146256	0.629592	0.00913853	0.163618	0.000458184	0.15495	0.175627	0.218613	0.45525	0.228019	0.276675	0.0241677	0.173232	0.228807	0.382974	0.0911714	0.00677648	-0.064044	0.0909831	0.17273	0.21618	0.211206	0.0515144	0.254218	0.17273	0.21618	0.192872	0.0521442	0.211206
0.134493	0.164427	0.195982	0.0581494	0.148397	0.155764	0.1826	0.121467	0.077904	496	0.366733	0.405496	0.442698	0.241142	0.385223	0.394669	0.427317	0.348521	0.279113	496	0.253184	0.143158	0.621068	0.0174234	0.17167	0.0105481	0.162446	0.189943	0.213378	0.443508	0.228281	0.27427	0.0331524	0.1661	0.227084	0.387258	0.0869235	0.00543619	-0.0741814	0.0935861	0.17067	0.207316	0.207936	0.030744	0.257532	0.17067	0.207316	0.197577	0.0398824	0.207936
0.131486	0.163762	0.221582	0.0591012	0.135857	0.153186	0.180757	0.139244	0.0827239	497	0.36261	0.404675	0.470725	0.243107	0.368588	0.39139	0.425155	0.373154	0.287618	497	0.258427	0.147927	0.624546	0.0288293	0.183464	0.0208532	0.175081	0.194833	0.228325	0.446281	0.231689	0.278949	0.043714	0.177766	0.231158	0.403942	0.128831	0.0655243	-0.129643	0.0536916	0.164385	0.214296	0.215852	0.0405013	0.269282	0.164385	0.214296	0.234854	0.0725012	0.215852
0.129476	0.164502	0.2142	0.055595	0.148671	0.149739	0.212639	0.121482	0.075087	498	0.359828	0.405588	0.462817	0.235786	0.385579	0.386961	0.461128	0.348542	0.27402	498	0.261277	0.157264	0.629072	0.0319284	0.192945	0.018463	0.18801	0.203433	0.230465	0.4472	0.237247	0.277862	0.0548122	0.177826	0.23334	0.404047	0.147016	0.0444653	-0.0964921	0.036262	0.163758	0.222806	0.208603	0.0583742	0.265765	0.163758	0.222806	0.241097	0.0884654	0.208603
0.141161	0.177012	0.206973	0.0582422	0.138072	0.146581	0.197494	0.132511	0.0794749	499	0.375714	0.420728	0.454943	0.241334	0.371581	0.382859	0.444403	0.364021	0.281913	499	0.24887	0.204739	0.638616	0.0413861	0.190592	0.0483607	0.171077	0.200131	0.218429	0.440246	0.235312	0.276781	0.0474774	0.185086	0.237443	0.423972	0.143528	0.037039	-0.0853331	0.0343597	0.170067	0.231007	0.210666	0.0800973	0.256106	0.170067	0.231007	0.21517	0.114005	0.210666
0.142674	0.170741	0.225728	0.0637864	0.143246	0.147474	0.192435	0.131688	0.0867864	500	0.377722	0.413208	0.475108	0.25256	0.378478	0.384024	0.438674	0.362888	0.294595	500	0.225273	0.23078	0.643599	0.0417564	0.173955	0.050343	0.163013	0.210216	0.250001	0.445996	0.248424	0.268255	0.0431174	0.175034	0.242123	0.433167	0.137432	0.0362235	-0.0778852	0.0410984	0.180286	0.228908	0.203049	0.0826002	0.254313	0.180286	0.228908	0.214258	0.116101	0.203049
0.139776	0.164595	0.216584	0.0593737	0.138641	0.144943	0.201723	0.127095	0.081934	501	0.373867	0.405703	0.465385	0.243667	0.372345	0.380714	0.449136	0.356504	0.286241	501	0.237979	0.220958	0.644739	0.00723596	0.155564	0.0716498	0.153829	0.195974	0.244022	0.453137	0.205905	0.248017	0.0657946	0.164981	0.232937	0.421626	0.116465	0.0204162	-0.0643064	0.0328723	0.158413	0.191271	0.182848	0.105911	0.244632	0.158413	0.191271	0.2041	0.11301	0.182848
0.137551	0.16854	0.212739	0.0597675	0.148918	0.138648	0.209733	0.131596	0.0840517	502	0.370878	0.410536	0.461237	0.244474	0.385898	0.372354	0.457967	0.362762	0.289917	502	0.257349	0.204191	0.642835	0.0214062	0.158555	0.0669672	0.154629	0.16507	0.225111	0.453713	0.217087	0.252127	0.067051	0.16061	0.200759	0.414848	0.111116	0.0151844	-0.069378	0.0355985	0.163641	0.196295	0.183328	0.102764	0.246451	0.163641	0.196295	0.207872	0.110593	0.183328
0.136335	0.161531	0.206026	0.0601488	0.145929	0.148463	0.214688	0.138297	0.0887385	503	0.369236	0.401909	0.453901	0.245252	0.382006	0.385309	0.463344	0.371884	0.29789	503	0.247564	0.203901	0.641714	0.00666521	0.165892	0.0634457	0.148493	0.15878	0.230135	0.445597	0.207161	0.260402	0.036228	0.159	0.187056	0.415408	0.117596	0.0129019	-0.0720086	0.0382998	0.166417	0.183971	0.190827	0.097039	0.240982	0.166417	0.183971	0.168836	0.107232	0.190827
0.131335	0.161826	0.213398	0.0563565	0.131657	0.14103	0.197776	0.13121	0.0836685	504	0.362401	0.402276	0.46195	0.237395	0.362845	0.375539	0.44472	0.362229	0.289255	504	0.251964	0.213593	0.641789	0.0104129	0.172089	0.071633	0.142557	0.159499	0.231791	0.449631	0.212549	0.266361	0.048823	0.163714	0.199679	0.431567	0.133922	0.0284591	-0.0364438	0.0617766	0.207908	0.180203	0.188499	0.0866156	0.230314	0.207908	0.180203	0.161037	0.0912515	0.188499
0.127606	0.160377	0.21369	0.0564687	0.137033	0.146215	0.205338	0.128763	0.0811698	505	0.35722	0.40047	0.462266	0.237631	0.37018	0.382381	0.453142	0.358836	0.284903	505	0.239283	0.22604	0.655499	0.0158341	0.145702	0.0805294	0.13948	0.1852	0.227104	0.432468	0.211767	0.268885	0.0470593	0.164227	0.195212	0.439068	0.137442	0.0180031	-0.0316544	0.0612135	0.220087	0.184663	0.161236	0.095099	0.225121	0.220087	0.184663	0.169966	0.0975258	0.161236
0.13488	0.17179	0.224371	0.0625452	0.149056	0.150988	0.200012	0.131981	0.0833237	506	0.36726	0.414475	0.473678	0.25009	0.386078	0.388572	0.447227	0.363291	0.288659	506	0.235482	0.224968	0.655432	0.0127026	0.153592	0.0935142	0.134499	0.190986	0.231628	0.433731	0.201802	0.258091	0.0623327	0.177895	0.203059	0.440403	0.131327	0.0111988	-0.0226029	0.0720207	0.224857	0.17989	0.157363	0.103545	0.228593	0.224857	0.17989	0.166571	0.0806803	0.157363
0.138539	0.16334	0.215289	0.0610008	0.15377	0.138777	0.198393	0.137788	0.0857665	507	0.372208	0.404154	0.463993	0.246983	0.392136	0.372527	0.445413	0.371199	0.292859	507	0.234073	0.219538	0.659687	0.00905872	0.150408	0.0899214	0.1313	0.187606	0.209959	0.419357	0.181693	0.239747	0.0503861	0.169521	0.186086	0.419503	0.10197	-0.00787302	-0.0233635	0.0731516	0.215107	0.159607	0.135515	0.0902832	0.219162	0.215107	0.159607	0.151662	0.0674416	0.135515
0.13845	0.164723	0.21486	0.0584682	0.147475	0.142317	0.199734	0.134718	0.0788822	508	0.372089	0.405861	0.46353	0.241802	0.384025	0.377249	0.446916	0.36704	0.28086	508	0.231677	0.219313	0.657936	-0.0121834	0.16747	0.0868162	0.123337	0.181021	0.209414	0.417045	0.181282	0.234616	0.0490999	0.166094	0.181315	0.420037	0.101025	-0.00362922	-0.0240096	0.0722239	0.215531	0.137815	0.158619	0.0864111	0.210174	0.215531	0.137815	0.144594	0.0297565	0.158619
0.127924	0.159756	0.213751	0.0572271	0.139312	0.140397	0.196167	0.129518	0.0771798	509	0.357665	0.399694	0.462332	0.239222	0.373245	0.374697	0.442907	0.359887	0.277813	509	0.236469	0.230621	0.666182	0.00527406	0.161976	0.0723426	0.103906	0.185747	0.214878	0.421253	0.187622	0.232003	0.042216	0.157242	0.18387	0.429033	0.118407	-0.0066054	-0.0298632	0.0651039	0.218486	0.164599	0.150966	0.0733088	0.193137	0.218486	0.164599	0.122811	0.00125133	0.150966
0.134242	0.160366	0.213165	0.0563696	0.129153	0.139394	0.188411	0.131845	0.0779444	510	0.36639	0.400457	0.461698	0.237423	0.359379	0.373355	0.434063	0.363105	0.279185	510	0.235671	0.233778	0.672901	0.0233414	0.172073	0.0732845	0.127961	0.185319	0.21569	0.421074	0.189231	0.231938	0.0427098	0.15811	0.183335	0.430098	0.123824	0.000139892	-0.0301133	0.0741407	0.219903	0.186938	0.171298	0.0713325	0.22452	0.219903	0.186938	0.118842	0.0598277	0.171298
0.14104	0.16173	0.209699	0.0592179	0.136378	0.152907	0.197521	0.13375	0.0838049	511	0.375553	0.402157	0.457929	0.243347	0.369294	0.391033	0.444433	0.365718	0.289491	511	0.245218	0.246968	0.672279	0.0315221	0.179785	0.0690014	0.131372	0.191893	0.22647	0.421606	0.190043	0.235935	0.0352178	0.163647	0.187906	0.429763	0.127297	0.00914914	-0.0383195	0.0808487	0.226242	0.187448	0.17218	0.0682141	0.227161	0.226242	0.187448	0.102982	0.0729854	0.17218
0.128034	0.161932	0.205004	0.053112	0.14467	0.143322	0.214781	0.12036	0.0770396	512	0.357818	0.402408	0.452773	0.230461	0.380355	0.378579	0.463445	0.34693	0.27756	512	0.247961	0.259879	0.671159	0.0404408	0.159591	0.0635449	0.121147	0.173598	0.225256	0.422659	0.189986	0.240237	0.0352116	0.164486	0.189936	0.435536	0.131426	0.0272243	-0.039868	0.0947039	0.230117	0.192743	0.164035	0.0649475	0.223417	0.230117	0.192743	0.102801	0.0818358	0.164035
0.14318	0.172959	0.224699	0.0575995	0.138396	0.155859	0.187085	0.132239	0.0758649	513	0.378392	0.415883	0.474025	0.239999	0.372017	0.39479	0.432533	0.363646	0.275436	513	0.252329	0.251295	0.660937	0.0549319	0.164927	0.0841984	0.115632	0.17513	0.224673	0.437472	0.20289	0.247043	0.0227587	0.182788	0.204237	0.413481	0.14325	0.0290383	-0.00374575	0.0724844	0.221234	0.2301	0.18105	0.0728236	0.238905	0.221234	0.2301	0.0621902	0.120719	0.18105
0.143715	0.169731	0.218479	0.066658	0.13779	0.146112	0.197739	0.135872	0.0840362	514	0.379097	0.411984	0.467417	0.258182	0.371201	0.382247	0.444679	0.368608	0.28989	514	0.239985	0.24072	0.663401	0.0720224	0.14253	0.0959386	0.10757	0.196065	0.211924	0.439521	0.218099	0.224739	0.035657	0.17523	0.22552	0.414546	0.155969	0.00399833	0.00696593	0.0648243	0.239586	0.230436	0.18165	0.0745721	0.238326	0.239586	0.230436	0.0534318	0.123689	0.18165
0.131439	0.167594	0.222095	0.055479	0.13746	0.139779	0.186261	0.134758	0.0800255	515	0.362545	0.409383	0.47127	0.23554	0.370756	0.37387	0.43158	0.367094	0.282888	515	0.218839	0.230705	0.652662	0.0770724	0.134861	0.103427	0.0822942	0.178273	0.205044	0.418557	0.222693	0.217066	0.0301392	0.159676	0.208906	0.408721	0.157733	-0.00119249	0.00415788	0.0558298	0.23173	0.244027	0.171864	0.0823399	0.207107	0.23173	0.244027	0.0542427	0.127695	0.171864
0.138879	0.157041	0.217696	0.0583068	0.146551	0.134977	0.199471	0.129648	0.0805771	516	0.372665	0.396284	0.466579	0.241468	0.38282	0.367392	0.446622	0.360066	0.283861	516	0.225181	0.21222	0.644588	0.0705201	0.133376	0.10657	0.0871272	0.178998	0.187628	0.424358	0.224508	0.222324	0.0452107	0.149981	0.206434	0.415584	0.166048	0.00331688	0.0136819	0.0385947	0.2252	0.243646	0.170365	0.0767604	0.213722	0.2252	0.243646	0.0495139	0.130935	0.170365
0.135825	0.160933	0.212249	0.0581979	0.143354	0.147945	0.187718	0.123754	0.0716264	517	0.368545	0.401164	0.460705	0.241242	0.378621	0.384636	0.433264	0.351787	0.267631	517	0.237549	0.208731	0.640758	0.0613946	0.152299	0.104339	0.0902345	0.176516	0.197377	0.437648	0.250305	0.221722	0.0682359	0.171704	0.220354	0.417389	0.16771	0.0159584	0.0208698	0.0506188	0.227437	0.262396	0.188599	0.102392	0.243584	0.227437	0.262396	0.07509	0.168795	0.188599
0.135034	0.162331	0.213275	0.0596931	0.140492	0.142589	0.200888	0.136432	0.0786008	518	0.36747	0.402904	0.461817	0.244322	0.374823	0.377609	0.448205	0.369367	0.280358	518	0.234073	0.212842	0.638987	0.0628606	0.149258	0.112457	0.0991348	0.196528	0.183244	0.437796	0.224382	0.213601	0.0640878	0.159686	0.212573	0.413682	0.191193	0.0290726	0.023064	0.0617052	0.237597	0.250755	0.183141	0.106919	0.245471	0.237597	0.250755	0.0895693	0.195105	0.183141
0.139583	0.157665	0.215389	0.0574418	0.139461	0.142823	0.18077	0.126432	0.0711924	519	0.373607	0.39707	0.464101	0.23967	0.373445	0.377919	0.425171	0.355572	0.266819	519	0.233575	0.213016	0.637738	0.0613	0.148873	0.108919	0.0929361	0.196898	0.181208	0.439301	0.222298	0.214178	0.0634441	0.157837	0.213611	0.413968	0.192137	0.0284241	0.0232062	0.0638461	0.236513	0.247805	0.183297	0.100257	0.23446	0.236513	0.247805	0.0869006	0.193058	0.183297
0.129145	0.156686	0.211344	0.0557338	0.148075	0.143962	0.20055	0.123525	0.0791175	520	0.359367	0.395836	0.459721	0.23608	0.384805	0.379423	0.447828	0.351461	0.281278	520	0.243485	0.212366	0.640402	0.0616183	0.151155	0.133695	0.0988829	0.235904	0.182553	0.438152	0.222343	0.21001	0.053384	0.155605	0.204081	0.414945	0.19345	0.0334793	0.0239706	0.0655778	0.250569	0.251335	0.1947	0.092669	0.236406	0.250569	0.251335	0.0829474	0.19463	0.1947
0.140975	0.171327	0.225888	0.0610502	0.141443	0.147618	0.194956	0.130032	0.0815913	521	0.375467	0.413917	0.475277	0.247083	0.376089	0.38421	0.441539	0.360599	0.285642	521	0.239147	0.205925	0.634873	0.0711613	0.154437	0.137457	0.0947863	0.236458	0.185022	0.439023	0.240435	0.21073	0.0630918	0.14726	0.206563	0.423324	0.204407	0.0242631	0.0373241	0.0556007	0.251927	0.261965	0.188104	0.10203	0.228941	0.251927	0.261965	0.0735945	0.211127	0.188104
0.139806	0.161717	0.219586	0.0605171	0.131025	0.134193	0.197921	0.132189	0.0842112	522	0.373907	0.402141	0.4686	0.246002	0.361974	0.366323	0.444883	0.363577	0.290192	522	0.203541	0.178525	0.625298	0.0650285	0.140232	0.13894	0.0874713	0.22603	0.197404	0.423285	0.206278	0.193241	0.0634224	0.17358	0.191211	0.413063	0.186935	0.00825489	0.0387106	0.0684054	0.240591	0.253576	0.177389	0.103211	0.231344	0.240591	0.253576	0.0730739	0.200281	0.177389
0.141521	0.174543	0.22375	0.0616546	0.141926	0.138241	0.199739	0.131611	0.0841144	523	0.376192	0.417783	0.473022	0.248303	0.37673	0.371808	0.446922	0.362782	0.290025	523	0.196794	0.16087	0.610789	0.0817018	0.163826	0.129135	0.0732821	0.199834	0.224889	0.438362	0.222631	0.178983	0.0893508	0.197247	0.21972	0.420597	0.215565	0.00694978	0.0628953	0.0898366	0.256109	0.282544	0.185414	0.116904	0.240457	0.256109	0.282544	0.0935422	0.224728	0.185414
0.144249	0.166362	0.211072	0.0610859	0.138362	0.133437	0.203587	0.131034	0.0810615	524	0.379801	0.407875	0.459426	0.247156	0.371971	0.365291	0.451206	0.361986	0.284713	524	0.168597	0.139772	0.600627	0.06865	0.179475	0.118467	0.0647596	0.178535	0.201722	0.420876	0.20725	0.204733	0.0753414	0.190697	0.197739	0.407291	0.20314	0.0278475	0.0521827	0.0832176	0.239729	0.272377	0.197296	0.107017	0.234457	0.239729	0.272377	0.0909176	0.212112	0.197296
0.135171	0.165656	0.221973	0.0616726	0.139569	0.151401	0.200025	0.138574	0.084398	525	0.367657	0.407008	0.47114	0.24834	0.37359	0.389103	0.447241	0.372255	0.290513	525	0.184683	0.190671	0.5909	0.0883097	0.256864	0.134352	0.0283927	0.184232	0.227172	0.421422	0.216867	0.242031	0.089917	0.170583	0.203689	0.423139	0.213731	0.0584788	0.0884005	0.0657481	0.255872	0.28051	0.234911	0.105058	0.219067	0.255872	0.28051	0.10419	0.204056	0.234911
0.126397	0.161347	0.214484	0.0574896	0.14655	0.1356	0.207472	0.123531	0.0826189	526	0.355524	0.40168	0.463124	0.23977	0.382818	0.368239	0.455491	0.351469	0.287435	526	0.172764	0.184265	0.590923	0.0847805	0.222247	0.133245	0.0104562	0.18399	0.218704	0.410764	0.216967	0.241944	0.0813168	0.162452	0.185125	0.410906	0.21285	0.0352932	0.0793841	0.0410667	0.237793	0.279692	0.197561	0.0956227	0.189955	0.237793	0.279692	0.102039	0.205143	0.197561
0.127964	0.165178	0.213252	0.0560899	0.144447	0.138121	0.200447	0.139949	0.0837485	527	0.357721	0.40642	0.461792	0.236833	0.380062	0.371647	0.447713	0.374098	0.289393	527	0.172336	0.182942	0.603394	0.107012	0.210076	0.161099	0.00295969	0.191013	0.218579	0.407994	0.217096	0.244358	0.0805122	0.163859	0.185434	0.405772	0.209754	0.0384671	0.0746525	0.0432361	0.237291	0.281493	0.200067	0.0955213	0.193631	0.237291	0.281493	0.0811993	0.220015	0.200067
0.147089	0.170644	0.22109	0.0621934	0.135181	0.146176	0.199034	0.131962	0.0818042	528	0.383522	0.413091	0.470202	0.249386	0.367669	0.382329	0.446132	0.363266	0.286014	528	0.178393	0.184805	0.604592	0.117387	0.207971	0.171332	0.0198182	0.20764	0.218575	0.409616	0.211103	0.249673	0.0746137	0.151935	0.176418	0.406175	0.211338	0.0404052	0.077035	0.0423649	0.240195	0.284541	0.200643	0.0982157	0.200683	0.240195	0.284541	0.0793158	0.201708	0.200643
0.137326	0.166327	0.210005	0.0581759	0.144172	0.147408	0.199129	0.123174	0.0768809	529	0.370575	0.407832	0.458263	0.241197	0.3797	0.383937	0.446239	0.350962	0.277274	529	0.141348	0.157201	0.587083	0.136903	0.192538	0.159111	-0.00332186	0.183611	0.204057	0.391391	0.222936	0.240969	0.0640955	0.141242	0.162161	0.390787	0.220432	0.033087	0.0677943	0.033426	0.231876	0.298497	0.188106	0.0879894	0.188989	0.231876	0.298497	0.0827838	0.207265	0.188106
0.137931	0.169566	0.208894	0.0556873	0.135847	0.147087	0.185086	0.130477	0.0781935	530	0.371391	0.411784	0.457049	0.235982	0.368574	0.383519	0.430216	0.361216	0.279631	530	0.132403	0.162196	0.584303	0.126357	0.182506	0.152197	0.00686768	0.187331	0.206152	0.384936	0.208045	0.227245	0.0541907	0.151	0.157187	0.395415	0.229104	0.0416008	0.0737183	0.0301711	0.234527	0.297893	0.187211	0.0872748	0.195767	0.234527	0.297893	0.0841258	0.217546	0.187211
0.140412	0.161569	0.216066	0.0599742	0.139424	0.150038	0.193811	0.116214	0.0747719	531	0.374717	0.401956	0.464829	0.244896	0.373396	0.387348	0.44024	0.340901	0.273444	531	0.100364	0.170829	0.587592	0.147633	0.18939	0.184	-0.00483258	0.202532	0.213057	0.38785	0.195434	0.191557	0.0593066	0.148893	0.140075	0.395178	0.227388	0.0491881	0.0687559	0.0323763	0.234742	0.295706	0.188807	0.0861882	0.196432	0.234742	0.295706	0.0960073	0.211553	0.188807
0.136184	0.159405	0.218497	0.0567206	0.133903	0.144834	0.203243	0.13752	0.0830966	532	0.369031	0.399256	0.467436	0.238161	0.365927	0.380571	0.450825	0.370837	0.288265	532	0.112836	0.173236	0.583268	0.144076	0.159585	0.190921	0.0341849	0.229745	0.231291	0.399813	0.188128	0.169198	0.0688578	0.14571	0.152149	0.400442	0.222939	0.031007	0.0750495	0.039906	0.247255	0.291795	0.163144	0.0923571	0.227311	0.247255	0.291795	0.0951603	0.224174	0.163144
0.140518	0.16729	0.22167	0.0624308	0.14216	0.142918	0.185719	0.133795	0.0778031	533	0.374858	0.409011	0.470818	0.249862	0.377041	0.378045	0.430952	0.365781	0.278932	533	0.114657	0.166182	0.582631	0.151384	0.153687	0.180411	0.0160819	0.217355	0.236969	0.393277	0.180283	0.176412	0.0750901	0.144433	0.1474	0.393329	0.222936	0.0329256	0.067971	0.0172605	0.22791	0.298688	0.152771	0.0862411	0.233715	0.22791	0.298688	0.10051	0.250207	0.152771
0.136641	0.165734	0.223412	0.0606715	0.150016	0.149098	0.187356	0.130278	0.0797304	534	0.36965	0.407105	0.472665	0.246316	0.387319	0.386133	0.432846	0.360941	0.282366	534	0.094416	0.144399	0.565723	0.141228	0.151529	0.208238	-0.00738775	0.220527	0.234881	0.384354	0.173472	0.150257	0.0808233	0.139257	0.158597	0.380866	0.215816	0.014028	0.0789934	0.00688605	0.237305	0.291125	0.139563	0.110292	0.217463	0.237305	0.291125	0.109764	0.24384	0.139563
0.131322	0.166005	0.210872	0.0589665	0.138635	0.155354	0.194203	0.129288	0.0832391	535	0.362384	0.407437	0.459208	0.24283	0.372337	0.39415	0.440685	0.359566	0.288512	535	0.0502726	0.184458	0.576847	0.150834	0.157999	0.206243	0.0570211	0.254332	0.152645	0.327997	0.126818	0.117964	0.0985896	0.0639142	0.105001	0.407124	0.232492	0.0319149	0.0722142	0.117706	0.296011	0.294664	0.142827	0.112739	0.268487	0.296011	0.294664	0.122509	0.279257	0.142827
0.129449	0.163472	0.215771	0.0534293	0.137962	0.147071	0.184354	0.13653	0.0825177	536	0.35979	0.404317	0.464512	0.231148	0.371433	0.383498	0.429365	0.369499	0.287259	536	0.0492084	0.186054	0.578778	0.152487	0.162513	0.205839	0.0559397	0.257176	0.148726	0.317913	0.121499	0.0979175	0.099389	0.0621807	0.0915868	0.417228	0.244751	0.0436628	0.0696413	0.112079	0.302481	0.301686	0.127772	0.111638	0.262057	0.302481	0.301686	0.120138	0.272724	0.127772
0.129785	0.160304	0.206989	0.056041	0.144026	0.141043	0.20289	0.119207	0.0784405	537	0.360256	0.40038	0.45496	0.23673	0.379507	0.375556	0.450433	0.345264	0.280072	537	0.048681	0.175756	0.582644	0.156664	0.163512	0.193434	0.0527336	0.261135	0.148283	0.317689	0.120023	0.0938495	0.110054	0.0563572	0.0859822	0.40138	0.236345	0.0420616	0.0883373	0.116319	0.299672	0.307123	0.132465	0.0868635	0.264011	0.299672	0.307123	0.115772	0.268737	0.132465
0.137345	0.162131	0.215672	0.0562305	0.136382	0.141854	0.192499	0.128537	0.0806713	538	0.370601	0.402656	0.464405	0.23713	0.3693	0.376635	0.438747	0.35852	0.284027	538	0.0502898	0.171146	0.58214	0.132657	0.158135	0.19469	0.0255551	0.239439	0.148179	0.317972	0.113121	0.0929011	0.110259	0.0517757	0.0814944	0.401588	0.244251	0.0432499	0.0987094	0.109466	0.301066	0.295117	0.131249	0.0867546	0.255967	0.301066	0.295117	0.10746	0.328116	0.131249
0.132739	0.16951	0.22164	0.0616219	0.14259	0.147288	0.19179	0.132093	0.0771587	539	0.364334	0.411716	0.470787	0.248238	0.377612	0.383782	0.437939	0.363446	0.277775	539	0.0515981	0.173474	0.590017	0.143317	0.166022	0.208943	0.0430152	0.246446	0.150484	0.321141	0.117514	0.0971474	0.116413	0.0605968	0.0884579	0.407404	0.251118	0.0512017	0.109801	0.123913	0.308816	0.301958	0.141684	0.100198	0.272815	0.308816	0.301958	0.116415	0.338072	0.141684
0.148811	0.157914	0.211417	0.0623663	0.142828	0.147429	0.20614	0.132596	0.0820908	540	0.38576	0.397383	0.459801	0.249733	0.377926	0.383965	0.454026	0.364137	0.286515	540	0.0441846	0.173703	0.596767	0.139201	0.172465	0.217369	0.039722	0.260766	0.132294	0.299238	0.107338	0.0769354	0.118616	0.0475953	0.0779736	0.39569	0.242259	0.0421704	0.119098	0.112908	0.312422	0.290583	0.133059	0.115496	0.260324	0.312422	0.290583	0.117399	0.332895	0.133059
0.130412	0.156536	0.209582	0.0576314	0.140444	0.150534	0.19459	0.124081	0.0766206	541	0.361126	0.395647	0.457801	0.240065	0.374759	0.387987	0.441123	0.352251	0.276804	541	0.0612077	0.188055	0.562317	0.117315	0.135632	0.177291	0.00698674	0.232233	0.132482	0.31299	0.11115	0.081309	0.127804	0.0519237	0.0834222	0.404241	0.243843	0.0421209	0.123427	0.114459	0.315747	0.279022	0.112942	0.0792442	0.244601	0.315747	0.279022	0.104343	0.326883	0.112942
0.137627	0.164062	0.207755	0.0614483	0.142238	0.14931	0.200239	0.126378	0.0776804	542	0.370981	0.405046	0.455802	0.247888	0.377145	0.386407	0.44748	0.355497	0.278712	542	0.0608736	0.187941	0.563709	0.11768	0.13856	0.1762	0.00674785	0.232122	0.131067	0.317508	0.114197	0.0926139	0.128038	0.0487838	0.0820008	0.406707	0.245208	0.0471111	0.124282	0.113478	0.315357	0.277096	0.104876	0.0766336	0.247851	0.315357	0.277096	0.0987666	0.328096	0.104876
0.13153	0.168768	0.214665	0.0560941	0.136267	0.145391	0.195823	0.126465	0.0768406	543	0.36267	0.410814	0.463319	0.236842	0.369144	0.381302	0.442519	0.355619	0.277201	543	0.0593913	0.199435	0.555828	0.123544	0.142079	0.174527	0.0409725	0.258625	0.136078	0.314465	0.115538	0.092538	0.126737	0.0609427	0.092582	0.425253	0.251893	0.0603039	0.131847	0.115584	0.312119	0.273972	0.0902857	0.0661091	0.263783	0.312119	0.273972	0.101547	0.34901	0.0902857
0.132249	0.164562	0.209034	0.0559926	0.14463	0.145484	0.189827	0.132244	0.0803724	544	0.363661	0.405662	0.457202	0.236627	0.380303	0.381424	0.435691	0.363653	0.2835	544	0.0444334	0.209063	0.548533	0.111747	0.145371	0.195131	0.0167686	0.229289	0.125533	0.314802	0.123126	0.0782155	0.111295	0.0721767	0.105	0.42412	0.246697	0.0599555	0.141137	0.103365	0.297788	0.273485	0.0897214	0.0657177	0.260757	0.297788	0.273485	0.0916948	0.353262	0.0897214
0.129273	0.159283	0.226738	0.0534559	0.141742	0.136794	0.188149	0.127557	0.0744832	545	0.359546	0.399102	0.476171	0.231205	0.376486	0.369857	0.433761	0.357152	0.272916	545	0.0628534	0.198419	0.558596	0.103433	0.13128	0.214403	0.00397053	0.224801	0.11619	0.332499	0.108955	0.0593849	0.137352	0.0535502	0.0976694	0.406703	0.254843	0.0685472	0.126653	0.112034	0.301663	0.265616	0.0758862	0.0896519	0.245649	0.301663	0.265616	0.0941505	0.346663	0.0758862
0.136769	0.155753	0.198716	0.0558453	0.128488	0.136345	0.179314	0.130354	0.0735297	546	0.369823	0.394656	0.445776	0.236316	0.358452	0.369249	0.423454	0.361046	0.271164	546	0.0631519	0.208173	0.558056	0.106255	0.12973	0.212761	0.00439331	0.223525	0.120583	0.335079	0.117741	0.0688115	0.143106	0.0542172	0.0996142	0.431253	0.244374	0.0833832	0.146838	0.11202	0.325952	0.276835	0.0781876	0.0883564	0.247436	0.325952	0.276835	0.11298	0.345157	0.0781876
0.137765	0.162445	0.215589	0.0554988	0.139386	0.141129	0.199457	0.134613	0.0864942	547	0.371167	0.403044	0.464316	0.235582	0.373344	0.375672	0.446607	0.366896	0.294099	547	0.0840627	0.23168	0.569587	0.128909	0.160544	0.24688	-0.00460602	0.265001	0.109464	0.342265	0.110686	0.0753793	0.133093	0.057937	0.106858	0.435362	0.222828	0.0694419	0.111075	0.126233	0.304571	0.281269	0.0945793	0.0929691	0.245099	0.304571	0.281269	0.0833539	0.359378	0.0945793
0.13076	0.173019	0.219626	0.0589594	0.140281	0.140446	0.187039	0.126342	0.07695	548	0.361608	0.415955	0.468643	0.242816	0.374541	0.374761	0.43248	0.355445	0.277399	548	0.0862837	0.235256	0.580699	0.130053	0.171585	0.248042	-0.027453	0.242134	0.118162	0.350744	0.114834	0.0890679	0.14274	0.0503697	0.103338	0.445812	0.227607	0.0885567	0.125282	0.116752	0.304645	0.287398	0.114642	0.112674	0.243721	0.304645	0.287398	0.089992	0.355951	0.114642
0.131378	0.16099	0.216741	0.0568662	0.137773	0.146859	0.204081	0.124161	0.076439	549	0.362462	0.401235	0.465555	0.238466	0.371178	0.383222	0.451753	0.352365	0.276476	549	0.0869822	0.233464	0.578112	0.127112	0.165877	0.250502	-0.0268113	0.24137	0.0960591	0.333383	0.103465	0.0852413	0.169414	0.0541322	0.107239	0.444309	0.230974	0.102048	0.134596	0.115147	0.309626	0.292315	0.131115	0.120984	0.241177	0.309626	0.292315	0.0917851	0.350884	0.131115
0.138682	0.164684	0.209687	0.0621842	0.14576	0.141617	0.189961	0.133028	0.0822137	550	0.3724	0.405813	0.457915	0.249368	0.381785	0.376321	0.435845	0.364729	0.286729	550	0.0602664	0.231984	0.574444	0.10945	0.163408	0.252788	-0.0357595	0.240439	0.0909389	0.324785	0.137212	0.0820691	0.153572	0.0790129	0.10576	0.442746	0.227226	0.094605	0.125654	0.118207	0.31231	0.289648	0.127143	0.115565	0.24339	0.31231	0.289648	0.0838349	0.362317	0.127143
0.1408	0.160648	0.213154	0.0641037	0.147367	0.149899	0.204164	0.138373	0.0856397	551	0.375234	0.400809	0.461686	0.253187	0.383884	0.387167	0.451845	0.371985	0.292643	551	0.0488928	0.235245	0.557856	0.0872821	0.161354	0.26277	-0.0557733	0.222173	0.131643	0.327025	0.120578	0.0986753	0.134313	0.0721046	0.0874081	0.468739	0.219521	0.122064	0.0873887	0.122869	0.298829	0.263085	0.13524	0.116138	0.225824	0.298829	0.263085	0.096176	0.350802	0.13524
0.128224	0.154517	0.21056	0.0554754	0.130435	0.137948	0.192683	0.136956	0.0844954	552	0.358084	0.393086	0.458868	0.235532	0.361157	0.371413	0.438957	0.370076	0.290681	552	0.0551115	0.227709	0.533096	0.0732521	0.157493	0.235541	-0.0642877	0.213076	0.128639	0.337035	0.126779	0.107997	0.132113	0.083326	0.0990613	0.478881	0.211883	0.110587	0.0848526	0.109024	0.283189	0.231738	0.101633	0.0769056	0.1839	0.283189	0.231738	0.0703439	0.347156	0.101633
0.128615	0.157075	0.218031	0.0538782	0.139823	0.145063	0.187867	0.119044	0.0750713	553	0.35863	0.396327	0.466938	0.232117	0.373929	0.380871	0.433437	0.345028	0.273991	553	0.0732609	0.235866	0.537835	0.0762993	0.177328	0.232112	-0.0455886	0.254867	0.136133	0.344744	0.124691	0.123001	0.13043	0.1074	0.141828	0.481969	0.214537	0.119361	0.0846555	0.117631	0.30006	0.2364	0.112014	0.0769885	0.190821	0.30006	0.2364	0.0688608	0.379868	0.112014
0.133648	0.151941	0.216649	0.0577236	0.13867	0.140962	0.198676	0.12653	0.0819992	554	0.365578	0.389796	0.465456	0.240257	0.372384	0.375448	0.44573	0.35571	0.286355	554	0.0716471	0.239436	0.53737	0.0763816	0.176762	0.226753	-0.0491925	0.254001	0.140119	0.341774	0.12935	0.130737	0.131497	0.100438	0.138986	0.488294	0.211327	0.112727	0.0946054	0.13104	0.30617	0.235454	0.110628	0.067563	0.187811	0.30617	0.235454	0.0835791	0.382779	0.110628
0.129024	0.168931	0.209822	0.0562394	0.147156	0.146328	0.206324	0.133135	0.0805767	555	0.359199	0.411012	0.458064	0.237148	0.383609	0.382528	0.454229	0.364877	0.28386	555	0.0849248	0.238863	0.537202	0.0731573	0.168519	0.21403	-0.0594985	0.234679	0.154475	0.359947	0.132674	0.126335	0.131446	0.085605	0.144413	0.48894	0.207951	0.10368	0.0810344	0.116101	0.285056	0.230609	0.0975478	0.0490766	0.164837	0.285056	0.230609	0.0824716	0.37938	0.0975478
0.137222	0.169846	0.225845	0.0620208	0.134483	0.132428	0.198016	0.125435	0.0745409	556	0.370435	0.412124	0.475232	0.24904	0.366719	0.363906	0.44499	0.354168	0.273022	556	0.0904577	0.238835	0.537337	0.0795071	0.171804	0.222365	-0.0577071	0.238623	0.160868	0.343913	0.131144	0.104886	0.124957	0.0604499	0.142887	0.488509	0.216088	0.106022	0.0881912	0.118537	0.289484	0.22217	0.0950944	0.03971	0.163046	0.289484	0.22217	0.0633537	0.359279	0.0950944
0.133749	0.165363	0.221906	0.0567929	0.150287	0.142643	0.197776	0.12137	0.0787581	557	0.365717	0.406648	0.471069	0.238313	0.387668	0.377681	0.44472	0.348383	0.280639	557	0.0659119	0.217394	0.522215	0.0852894	0.191219	0.215438	-0.0564431	0.250535	0.131025	0.319554	0.139339	0.130209	0.115417	0.0674203	0.159257	0.463974	0.2274	0.132448	0.076826	0.124229	0.309011	0.2368	0.128158	0.0251987	0.173494	0.309011	0.2368	0.0658842	0.358838	0.128158
0.136428	0.158286	0.217382	0.0578548	0.132944	0.140718	0.199237	0.123768	0.0751954	558	0.369361	0.397851	0.466243	0.24053	0.364614	0.375124	0.446359	0.351807	0.274218	558	0.0902041	0.225549	0.550815	0.0977651	0.189033	0.188195	0.0128678	0.286563	0.129857	0.338944	0.135191	0.128194	0.0986463	0.109813	0.180078	0.468971	0.21038	0.128155	0.0609673	0.160641	0.317703	0.254316	0.128395	0.00260143	0.233437	0.317703	0.254316	0.0432142	0.411354	0.128395
0.130471	0.162882	0.216236	0.0543023	0.14084	0.13866	0.202879	0.129915	0.0842877	559	0.361207	0.403587	0.465012	0.233028	0.375287	0.37237	0.45042	0.360438	0.290323	559	0.0940048	0.213825	0.53977	0.116027	0.19275	0.191375	0.0319661	0.303292	0.129875	0.338621	0.138548	0.130665	0.104908	0.113848	0.183126	0.465094	0.210704	0.12403	0.045004	0.158848	0.313209	0.251032	0.122204	-0.0180424	0.226905	0.313209	0.251032	0.0832408	0.424215	0.122204
0.13681	0.164762	0.21754	0.0595343	0.129316	0.138479	0.194443	0.121447	0.0763217	560	0.369878	0.405909	0.466412	0.243996	0.359606	0.372128	0.440957	0.348493	0.276264	560	0.0944512	0.205991	0.541433	0.106617	0.193971	0.19395	0.034488	0.310791	0.121941	0.342069	0.129104	0.132362	0.0981776	0.111419	0.175463	0.461009	0.218039	0.121774	0.0276952	0.146139	0.284856	0.245772	0.1228	-0.0114859	0.23142	0.284856	0.245772	0.0633758	0.406948	0.1228
0.137133	0.157073	0.209546	0.057891	0.13911	0.1456	0.199469	0.129629	0.08057	561	0.370315	0.396324	0.457762	0.240605	0.372974	0.381576	0.44662	0.360041	0.283849	561	0.0824673	0.194335	0.530368	0.124895	0.196515	0.18866	0.0451248	0.312469	0.111575	0.331037	0.139684	0.138681	0.0902528	0.114138	0.172969	0.455444	0.235977	0.106385	0.035857	0.163782	0.291382	0.271656	0.114419	-0.00769821	0.252134	0.291382	0.271656	0.0771012	0.406256	0.114419
0.130223	0.158163	0.226832	0.0555234	0.144643	0.14195	0.185965	0.132512	0.0792203	562	0.360864	0.397696	0.476269	0.235634	0.38032	0.376763	0.431237	0.364022	0.281461	562	0.0892556	0.19711	0.515805	0.113056	0.165796	0.179898	0.061567	0.313446	0.110884	0.333202	0.13937	0.13589	0.0937462	0.11875	0.178419	0.459348	0.23734	0.109013	0.0372118	0.156286	0.287432	0.270427	0.111899	-0.0187625	0.225247	0.287432	0.270427	0.0709701	0.375259	0.111899
0.131932	0.174395	0.221208	0.0573021	0.147937	0.153448	0.200796	0.133694	0.0856562	563	0.363225	0.417606	0.470327	0.239379	0.384626	0.391725	0.448103	0.365643	0.292671	563	0.103783	0.204622	0.509511	0.115241	0.17256	0.189671	0.0790317	0.328182	0.121405	0.328946	0.144434	0.143489	0.101501	0.137044	0.196685	0.465568	0.214402	0.106673	0.0669761	0.142876	0.28446	0.270284	0.110047	-0.0180864	0.219834	0.28446	0.270284	0.0898403	0.365372	0.110047
0.13532	0.164236	0.211664	0.0557903	0.137161	0.142687	0.19719	0.124175	0.0763071	564	0.367859	0.40526	0.46007	0.2362	0.370353	0.37774	0.444061	0.352385	0.276237	564	0.0948253	0.200026	0.507564	0.106181	0.163976	0.185693	0.0722082	0.326147	0.0889763	0.320979	0.098239	0.0916385	0.078338	0.107082	0.146762	0.461674	0.18653	0.0718868	0.0554709	0.122832	0.260686	0.25469	0.0889702	-0.0179487	0.20775	0.260686	0.25469	0.0585287	0.350333	0.0889702
0.132929	0.161076	0.212279	0.0586056	0.133765	0.13914	0.197641	0.134445	0.0816683	565	0.364594	0.401343	0.460738	0.242086	0.365739	0.373015	0.444569	0.366667	0.285777	565	0.0953527	0.214863	0.518306	0.122428	0.17198	0.181556	0.0793094	0.338006	0.102684	0.332769	0.111942	0.0990523	0.075016	0.11286	0.157563	0.480577	0.209076	0.0917215	0.0576993	0.126631	0.27459	0.282248	0.114846	-0.0137747	0.210039	0.27459	0.282248	0.0606331	0.350995	0.114846
0.137486	0.161086	0.212321	0.0548885	0.132278	0.145801	0.19651	0.127496	0.0791727	566	0.370791	0.401356	0.460783	0.234283	0.3637	0.38184	0.443294	0.357065	0.281376	566	0.092693	0.213516	0.503279	0.125932	0.172589	0.176924	0.0683552	0.330603	0.101331	0.309774	0.115408	0.099644	0.0689867	0.101235	0.147719	0.472044	0.210334	0.0917804	0.0559387	0.123602	0.273124	0.279195	0.111787	-0.0138906	0.20606	0.273124	0.279195	0.0624204	0.35823	0.111787
0.124696	0.160687	0.21443	0.0533399	0.125058	0.155989	0.200571	0.125728	0.0779985	567	0.353123	0.400858	0.463066	0.230954	0.353635	0.394955	0.447851	0.354581	0.279282	567	0.0903758	0.21551	0.511641	0.148941	0.168247	0.18336	0.068347	0.332428	0.102795	0.311472	0.124833	0.101991	0.0753281	0.102424	0.151978	0.473189	0.217783	0.0963271	0.0635805	0.125298	0.276883	0.281346	0.116536	-0.0073834	0.20759	0.276883	0.281346	0.0885444	0.364364	0.116536
0.130582	0.160541	0.226234	0.0586442	0.127982	0.142672	0.192249	0.124012	0.0733033	568	0.361361	0.400675	0.475641	0.242166	0.357746	0.377719	0.438462	0.352153	0.270746	568	0.0993199	0.22069	0.510865	0.135958	0.191664	0.197839	0.0729822	0.340095	0.0974043	0.323907	0.14032	0.0763045	0.0749318	0.110865	0.153067	0.469626	0.232577	0.0866347	0.0561915	0.122479	0.273567	0.280309	0.112082	0.00496803	0.217948	0.273567	0.280309	0.115772	0.374388	0.112082
0.133668	0.161968	0.207257	0.0538533	0.139659	0.137128	0.194043	0.13057	0.0771369	569	0.365607	0.402453	0.455255	0.232063	0.373709	0.370308	0.440503	0.361345	0.277735	569	0.111363	0.218762	0.514081	0.151126	0.197727	0.203645	0.0707283	0.337668	0.0909463	0.325961	0.155578	0.0811348	0.0809324	0.109507	0.153626	0.457004	0.275501	0.0738257	0.0598468	0.133135	0.300831	0.30715	0.109065	0.00952911	0.221902	0.300831	0.30715	0.119921	0.370949	0.109065
0.13265	0.15228	0.219277	0.0571439	0.137016	0.1392	0.192065	0.136149	0.0806904	570	0.364211	0.390231	0.468271	0.239048	0.370156	0.373095	0.438252	0.368984	0.284061	570	0.104689	0.223056	0.513454	0.144215	0.199045	0.202955	0.0634822	0.335959	0.0979339	0.33891	0.161745	0.0928347	0.0709437	0.10403	0.13931	0.457495	0.28203	0.0770947	0.0566804	0.137015	0.294856	0.321273	0.12144	-0.00159296	0.22352	0.294856	0.321273	0.108929	0.365162	0.12144
0.130902	0.151644	0.205514	0.0573081	0.138459	0.144884	0.185365	0.130699	0.0769251	571	0.361803	0.389414	0.453337	0.239391	0.372101	0.380636	0.430541	0.361523	0.277354	571	0.113578	0.211057	0.508094	0.138667	0.199326	0.199447	0.0504439	0.323833	0.108713	0.34634	0.160859	0.0944636	0.0673208	0.122758	0.148126	0.454069	0.286452	0.0753097	0.0642701	0.116138	0.288303	0.322413	0.120543	0.00193954	0.214705	0.288303	0.322413	0.114543	0.368098	0.120543
0.121719	0.170062	0.203708	0.052342	0.136654	0.138348	0.196271	0.126705	0.0758167	572	0.348882	0.412385	0.45134	0.228784	0.369667	0.371951	0.443025	0.355956	0.275348	572	0.117617	0.213097	0.506996	0.137277	0.191917	0.204962	0.047372	0.323411	0.094165	0.357827	0.16494	0.118638	0.0547128	0.130222	0.149711	0.457131	0.290269	0.0582701	0.0595138	0.126301	0.289795	0.319847	0.114272	0.0104897	0.208134	0.289795	0.319847	0.12068	0.366216	0.114272
0.132342	0.166343	0.224099	0.0611135	0.146015	0.140352	0.20259	0.129258	0.0823174	573	0.363789	0.407852	0.473391	0.247211	0.38212	0.374636	0.4501	0.359525	0.28691	573	0.15066	0.201328	0.502	0.14297	0.196064	0.217476	0.052469	0.32628	0.114962	0.380804	0.162225	0.11701	0.0429723	0.127066	0.153514	0.451604	0.290936	0.0569461	0.0634918	0.128089	0.289512	0.324657	0.118765	0.0190584	0.212522	0.289512	0.324657	0.126631	0.368432	0.118765
0.135316	0.160016	0.207219	0.056723	0.134133	0.140442	0.185392	0.125756	0.0783189	574	0.367853	0.40002	0.455213	0.238166	0.366242	0.374756	0.430572	0.354621	0.279855	574	0.158604	0.206103	0.521072	0.140576	0.193663	0.20086	0.0595199	0.333444	0.0997489	0.376949	0.146095	0.114407	0.0198355	0.125786	0.144454	0.437273	0.267899	0.0524743	0.0313002	0.123486	0.273372	0.301919	0.113739	-0.0203235	0.214456	0.273372	0.301919	0.101479	0.365497	0.113739
0.131628	0.167912	0.21354	0.0641073	0.141832	0.137287	0.189922	0.130249	0.0794238	575	0.362806	0.40977	0.462104	0.253194	0.376606	0.370522	0.435801	0.360901	0.281822	575	0.145462	0.205537	0.50725	0.147002	0.187535	0.22166	0.0507995	0.327966	0.123965	0.390933	0.138173	0.123923	-0.00518889	0.155944	0.143148	0.452007	0.259067	0.0631431	0.00430566	0.146952	0.276153	0.296386	0.120267	-0.0348735	0.235174	0.276153	0.296386	0.103285	0.351734	0.120267
0.126881	0.16416	0.211192	0.0599004	0.140664	0.142809	0.199453	0.129552	0.080741	576	0.356204	0.405167	0.459556	0.244746	0.375052	0.3779	0.446602	0.359933	0.28415	576	0.151604	0.220363	0.522448	0.15271	0.19157	0.228669	0.0511464	0.327511	0.148928	0.381888	0.139277	0.132825	0.0104943	0.150213	0.135797	0.482356	0.275436	0.0715812	0.0197818	0.15086	0.275642	0.294839	0.136482	-0.0113804	0.225666	0.275642	0.294839	0.114663	0.348889	0.136482
0.139309	0.163853	0.217578	0.0594838	0.14139	0.149394	0.193584	0.124117	0.0761696	577	0.373242	0.404788	0.466452	0.243893	0.376019	0.386516	0.439982	0.352302	0.275988	577	0.147729	0.202771	0.534101	0.158656	0.194211	0.235025	0.0548744	0.332117	0.190257	0.378224	0.12071	0.129086	-0.00575324	0.139235	0.135719	0.488386	0.252106	0.0754993	0.00834824	0.141422	0.285652	0.279854	0.127471	-0.0316992	0.214854	0.285652	0.279854	0.108063	0.34453	0.127471
0.132104	0.165612	0.199833	0.054578	0.131659	0.133859	0.19999	0.125653	0.0784924	578	0.363461	0.406955	0.447026	0.233619	0.362848	0.365867	0.447202	0.354476	0.280165	578	0.132601	0.183677	0.517982	0.139951	0.165252	0.240309	0.0612427	0.340105	0.177605	0.375393	0.108153	0.129367	0.00503048	0.142613	0.150879	0.475714	0.243414	0.0536115	0.00598243	0.14468	0.282391	0.264703	0.112742	-0.0245067	0.221836	0.282391	0.264703	0.105527	0.348514	0.112742
0.122634	0.162151	0.20072	0.0503474	0.140368	0.144108	0.185628	0.132044	0.0756628	579	0.350191	0.40268	0.448017	0.224382	0.374658	0.379616	0.430845	0.363378	0.275069	579	0.136533	0.205874	0.533534	0.160571	0.153494	0.239617	0.0620731	0.35797	0.204155	0.3843	0.1258	0.1342	-0.00563615	0.143566	0.153248	0.485719	0.241876	0.0384863	0.0244266	0.147305	0.303596	0.276677	0.0995806	-0.0168866	0.22072	0.303596	0.276677	0.118335	0.349401	0.0995806
0.132609	0.165693	0.210203	0.0551614	0.142659	0.143042	0.199318	0.135614	0.0812512	580	0.364156	0.407054	0.458479	0.234865	0.377702	0.378209	0.44645	0.368258	0.285046	580	0.153458	0.191279	0.525504	0.176367	0.169726	0.231418	0.0837096	0.361186	0.20799	0.401476	0.130415	0.130519	0.0177933	0.155421	0.180734	0.474804	0.252089	0.0503884	0.00834641	0.158308	0.293515	0.29474	0.116452	-0.0292753	0.244493	0.293515	0.29474	0.134681	0.349163	0.116452
0.12996	0.169745	0.214452	0.0560073	0.144014	0.139443	0.199391	0.127782	0.0789257	581	0.360499	0.412001	0.46309	0.236659	0.379491	0.37342	0.446532	0.357466	0.280937	581	0.162775	0.178593	0.540192	0.210044	0.216199	0.211621	0.113448	0.373964	0.205564	0.409522	0.130067	0.138872	0.00195916	0.147232	0.173896	0.465931	0.243424	0.0427557	0.00793798	0.152475	0.28947	0.314205	0.145821	-0.0350903	0.264019	0.28947	0.314205	0.116582	0.35729	0.145821
0.132314	0.152119	0.216684	0.0530867	0.152843	0.14059	0.1981	0.127399	0.0778442	582	0.36375	0.390024	0.465493	0.230406	0.390952	0.374953	0.445084	0.35693	0.279006	582	0.146596	0.189386	0.533184	0.197696	0.215167	0.196461	0.120753	0.364861	0.176236	0.407836	0.110027	0.134795	-0.00685129	0.12798	0.164608	0.454437	0.22085	0.0416291	-0.0142765	0.160379	0.274097	0.310974	0.144336	-0.0375544	0.257828	0.274097	0.310974	0.11061	0.343797	0.144336
0.136488	0.177771	0.213608	0.0592617	0.140953	0.140764	0.19866	0.122694	0.0787606	583	0.369443	0.421629	0.462177	0.243437	0.375437	0.375186	0.445712	0.350277	0.280643	583	0.147847	0.182935	0.536962	0.180831	0.212824	0.191685	0.117356	0.362211	0.185846	0.407581	0.155828	0.134458	-0.00353077	0.134587	0.164615	0.461842	0.201788	0.0370562	-0.0231589	0.157527	0.269372	0.344609	0.145781	-0.0348093	0.261126	0.269372	0.344609	0.0865918	0.349077	0.145781
0.132576	0.153378	0.211848	0.0543251	0.141727	0.136735	0.198125	0.131263	0.0802744	584	0.36411	0.391634	0.46027	0.233078	0.376467	0.369778	0.445113	0.362302	0.283327	584	0.101612	0.17262	0.524337	0.164065	0.207364	0.179706	0.124958	0.350641	0.158723	0.376859	0.133095	0.129648	-0.0338984	0.161716	0.151675	0.451379	0.161069	0.0182723	-0.0374597	0.138667	0.227682	0.327474	0.138568	-0.0518199	0.270078	0.227682	0.327474	0.0820348	0.362913	0.138568
0.132055	0.155091	0.204887	0.0519884	0.133759	0.141488	0.204692	0.129205	0.0791866	585	0.363393	0.393816	0.452644	0.22801	0.36573	0.376149	0.452428	0.359451	0.281401	585	0.1176	0.163838	0.532653	0.14503	0.22399	0.141375	0.125648	0.330628	0.154574	0.385106	0.132046	0.14309	-0.0526959	0.175938	0.14933	0.442733	0.161099	0.0116315	-0.0291831	0.131627	0.228365	0.318736	0.153885	-0.076431	0.278669	0.228365	0.318736	0.0854368	0.345265	0.153885
0.12556	0.16411	0.21471	0.0561769	0.149978	0.144281	0.200926	0.127889	0.0853343	586	0.354344	0.405105	0.463368	0.237017	0.38727	0.379844	0.448247	0.357616	0.29212	586	0.128749	0.168315	0.544421	0.152618	0.22677	0.135195	0.133964	0.331989	0.150333	0.392258	0.145119	0.160157	-0.0374383	0.20966	0.187084	0.437453	0.158645	0.0144829	-0.0181256	0.131167	0.226266	0.324069	0.167792	-0.0560295	0.2982	0.226266	0.324069	0.0969593	0.359719	0.167792
0.129557	0.162373	0.22861	0.0587896	0.140488	0.142194	0.195714	0.127989	0.0787992	587	0.35994	0.402955	0.478132	0.242466	0.374817	0.377086	0.442396	0.357755	0.280712	587	0.137421	0.175495	0.553329	0.172863	0.22657	0.147994	0.139847	0.364841	0.142303	0.385726	0.113382	0.148426	-0.0561607	0.204122	0.158589	0.436206	0.142229	0.00353875	-0.0258348	0.128918	0.21815	0.312239	0.152212	-0.0602427	0.297461	0.21815	0.312239	0.0586851	0.356507	0.152212
0.117971	0.152031	0.218519	0.0522376	0.136035	0.122526	0.196727	0.123244	0.0732673	588	0.343469	0.389912	0.46746	0.228555	0.36883	0.350037	0.44354	0.351061	0.270679	588	0.123283	0.173829	0.551587	0.176539	0.23962	0.138651	0.14347	0.356329	0.119952	0.37553	0.096247	0.123877	-0.0562407	0.193412	0.153502	0.415196	0.115907	-0.0167345	-0.041916	0.117529	0.200378	0.298565	0.139273	-0.069224	0.291457	0.200378	0.298565	0.0486416	0.354542	0.139273
0.133673	0.158628	0.192705	0.0537107	0.135844	0.139848	0.197271	0.134987	0.072872	589	0.365614	0.398281	0.438982	0.231756	0.368571	0.373963	0.444152	0.367405	0.269948	589	0.11243	0.208648	0.551287	0.189776	0.192622	0.160974	0.142462	0.354681	0.128584	0.374117	0.106506	0.103778	-0.0429058	0.194168	0.154977	0.427689	0.108747	0.0186821	-0.0545669	0.120798	0.206774	0.304322	0.121804	-0.0589058	0.291653	0.206774	0.304322	0.0611152	0.357089	0.121804
0.138607	0.155623	0.225216	0.0583297	0.136054	0.133892	0.194122	0.123904	0.077585	590	0.372299	0.394491	0.474569	0.241515	0.368855	0.365912	0.440592	0.352001	0.278541	590	0.107521	0.237421	0.555334	0.199246	0.198465	0.159046	0.118562	0.363595	0.143772	0.37519	0.10242	0.100789	-0.0470991	0.189868	0.158077	0.435259	0.106815	0.0202167	-0.0398522	0.176897	0.196775	0.302009	0.122771	-0.0566716	0.298249	0.196775	0.302009	0.0713366	0.338049	0.122771
0.132842	0.159828	0.212594	0.0555873	0.132406	0.145852	0.178071	0.12545	0.0781274	591	0.364475	0.399785	0.461079	0.23577	0.363877	0.381906	0.421985	0.354189	0.279513	591	0.117302	0.198425	0.543937	0.199611	0.220032	0.156536	0.119426	0.353305	0.148685	0.382427	0.116379	0.113922	-0.0381442	0.172215	0.142816	0.417663	0.101838	0.0363807	-0.0495533	0.183398	0.185737	0.303175	0.13708	-0.0602045	0.297378	0.185737	0.303175	0.0743094	0.327766	0.13708
0.138328	0.155058	0.213922	0.0593133	0.140647	0.137246	0.190514	0.123968	0.0763205	592	0.371924	0.393774	0.462517	0.243543	0.37503	0.370468	0.436479	0.352091	0.276262	592	0.109969	0.196287	0.541691	0.205241	0.212139	0.179436	0.117957	0.34948	0.142057	0.38058	0.116809	0.102049	-0.0229314	0.171848	0.130259	0.414825	0.105634	0.0346068	-0.042944	0.181863	0.187871	0.305109	0.130748	-0.0505104	0.297036	0.187871	0.305109	0.0660327	0.328174	0.130748
0.135653	0.155116	0.204085	0.0534512	0.142811	0.14174	0.190324	0.117138	0.0731499	593	0.368311	0.393847	0.451758	0.231195	0.377904	0.376484	0.436262	0.342254	0.270462	593	0.131975	0.202137	0.529433	0.196018	0.21035	0.17793	0.125034	0.354622	0.185044	0.40624	0.146425	0.0852665	-0.0408905	0.174214	0.142516	0.427613	0.132248	0.0154396	-0.0633851	0.184681	0.197987	0.305355	0.122167	-0.0599781	0.304733	0.197987	0.305355	0.0534902	0.332374	0.122167
0.133585	0.142952	0.210158	0.0517401	0.126376	0.135138	0.211768	0.12458	0.078753	594	0.365492	0.37809	0.45843	0.227464	0.355494	0.367611	0.460183	0.352959	0.28063	594	0.135143	0.218696	0.541368	0.175947	0.192261	0.183653	0.148609	0.368606	0.183057	0.401753	0.14713	0.0916346	-0.0405951	0.174747	0.141439	0.428114	0.149342	0.0138367	-0.0659729	0.175342	0.195145	0.318802	0.105864	-0.0619118	0.300125	0.195145	0.318802	0.0562433	0.35703	0.105864
0.126958	0.151043	0.21526	0.0524563	0.142416	0.147025	0.188236	0.128913	0.0776	595	0.356311	0.388643	0.463962	0.229033	0.37738	0.383439	0.433861	0.359044	0.278568	595	0.169346	0.222373	0.559404	0.198495	0.196528	0.151737	0.146694	0.362626	0.196602	0.39615	0.116472	0.0826413	0.0232312	0.175718	0.171944	0.436452	0.151553	0.00855435	-0.083227	0.1653	0.201818	0.308937	0.0993316	-0.0432208	0.295529	0.201818	0.308937	0.109227	0.361236	0.0993316
0.1297	0.159482	0.21959	0.06187	0.138312	0.144673	0.183409	0.134415	0.0801517	596	0.360139	0.399352	0.468604	0.248737	0.371903	0.380359	0.428263	0.366626	0.283111	596	0.183668	0.238962	0.562268	0.193731	0.182323	0.175307	0.122466	0.368647	0.214424	0.397917	0.127797	0.0875896	0.0341196	0.168764	0.183886	0.448973	0.13444	-0.0134849	-0.0619698	0.145541	0.200623	0.319125	0.102537	-0.0339683	0.288989	0.200623	0.319125	0.11247	0.356417	0.102537
0.127697	0.158602	0.215751	0.0548882	0.133519	0.137418	0.190423	0.124268	0.077619	597	0.357347	0.398249	0.46449	0.234282	0.365402	0.3707	0.436375	0.352517	0.278602	597	0.173875	0.239057	0.577776	0.159132	0.180652	0.159605	0.147386	0.38341	0.20766	0.394587	0.125293	0.0814005	0.0434461	0.156568	0.173939	0.429214	0.117111	-0.0309205	-0.0452047	0.12672	0.185901	0.293392	0.0773037	-0.00630927	0.266782	0.185901	0.293392	0.134611	0.320363	0.0773037
0.131365	0.15978	0.208382	0.0559359	0.132082	0.144882	0.185391	0.128263	0.0759922	598	0.362443	0.399724	0.456488	0.236508	0.363431	0.380634	0.430571	0.358139	0.275667	598	0.159362	0.228603	0.569842	0.13582	0.180132	0.167031	0.141122	0.387456	0.222062	0.399597	0.162173	0.0805209	0.0218122	0.166972	0.158368	0.433333	0.14745	-0.0305595	-0.0593777	0.13631	0.169321	0.302411	0.0772374	-0.0151123	0.271163	0.169321	0.302411	0.0965565	0.328444	0.0772374
0.120124	0.164298	0.199334	0.052694	0.140156	0.144553	0.192463	0.129404	0.0778064	599	0.346589	0.405337	0.446468	0.229552	0.374374	0.380201	0.438706	0.359728	0.278938	599	0.151474	0.221164	0.562472	0.143273	0.160792	0.173716	0.132471	0.380715	0.227793	0.399087	0.159113	0.0827871	0.0308535	0.166733	0.160379	0.437653	0.136446	-0.0107028	-0.0550276	0.143124	0.176109	0.299872	0.0779332	-0.00545791	0.270326	0.176109	0.299872	0.0892997	0.32495	0.0779332
0.127816	0.162505	0.206952	0.0551942	0.141397	0.146987	0.192468	0.129342	0.0757457	600	0.357514	0.40312	0.45492	0.234935	0.376028	0.383388	0.438712	0.359641	0.275219	600	0.186909	0.206466	0.56916	0.160503	0.193254	0.172851	0.164668	0.409041	0.254984	0.418093	0.140095	0.0776623	0.0262596	0.169921	0.160493	0.437959	0.152013	0.0110527	-0.0563122	0.164114	0.194658	0.295969	0.0994692	-0.0109223	0.295299	0.194658	0.295969	0.0906484	0.304711	0.0994692
0.123751	0.149622	0.208525	0.0517224	0.147797	0.144281	0.189955	0.129397	0.0762691	601	0.351783	0.38681	0.456646	0.227425	0.384443	0.379843	0.435839	0.359717	0.276169	601	0.179013	0.19017	0.566278	0.166753	0.198745	0.161585	0.165158	0.412434	0.265751	0.415163	0.122294	0.0584407	0.0319366	0.160699	0.153468	0.436479	0.148879	0.0100742	-0.043946	0.164982	0.186167	0.292198	0.0933649	-0.0109592	0.292644	0.186167	0.292198	0.0852231	0.295981	0.0933649
0.124754	0.150898	0.218949	0.0555517	0.135132	0.139782	0.193538	0.130093	0.0839785	602	0.353205	0.388456	0.46792	0.235694	0.367603	0.373875	0.43993	0.360684	0.289791	602	0.169945	0.196261	0.563632	0.198915	0.21656	0.144248	0.175345	0.407907	0.259233	0.402485	0.156103	0.0673579	0.0326726	0.171807	0.160501	0.45187	0.15547	0.0371124	-0.0801405	0.165585	0.159832	0.325402	0.124757	-0.0456409	0.301092	0.159832	0.325402	0.0916591	0.28272	0.124757
0.130218	0.165559	0.21658	0.0558399	0.143215	0.14153	0.182119	0.131656	0.0779738	603	0.360857	0.406889	0.465381	0.236305	0.378437	0.376205	0.426754	0.362845	0.279238	603	0.168819	0.208441	0.570771	0.199244	0.214573	0.137883	0.188119	0.437324	0.271964	0.416679	0.152901	0.057713	0.0155038	0.197814	0.182287	0.44484	0.153951	0.0320666	-0.0806199	0.147529	0.128432	0.318823	0.110244	-0.0613655	0.307444	0.128432	0.318823	0.0959846	0.271938	0.110244
0.127289	0.158937	0.212563	0.055444	0.134409	0.136197	0.18092	0.128158	0.075619	604	0.356776	0.398669	0.461046	0.235466	0.366618	0.369048	0.425347	0.357992	0.274989	604	0.175299	0.209514	0.573012	0.202117	0.219127	0.137897	0.18525	0.437109	0.269115	0.425066	0.151666	0.0701016	0.0183118	0.183573	0.176593	0.446301	0.144937	0.0334059	-0.0717909	0.136068	0.122164	0.323921	0.119007	-0.0637285	0.303306	0.122164	0.323921	0.111991	0.255683	0.119007
0.122191	0.164391	0.208079	0.0508957	0.136583	0.148748	0.191722	0.129557	0.0748207	605	0.349558	0.405452	0.456157	0.225601	0.369572	0.385679	0.437861	0.35994	0.273534	605	0.179356	0.207627	0.57676	0.207531	0.221665	0.142482	0.182791	0.44001	0.263272	0.426958	0.157105	0.0739124	0.0335335	0.176344	0.178928	0.436676	0.138474	0.0315859	-0.0650808	0.133965	0.117317	0.332113	0.124846	-0.044447	0.292213	0.117317	0.332113	0.125331	0.247087	0.124846
0.132376	0.167855	0.218713	0.0585437	0.134972	0.136584	0.203802	0.138554	0.0816449	606	0.363835	0.409701	0.467668	0.241958	0.367385	0.369573	0.451445	0.372228	0.285736	606	0.20358	0.211595	0.571768	0.215759	0.25422	0.132457	0.20062	0.442912	0.289932	0.455695	0.14364	0.0611576	0.00298225	0.186937	0.204008	0.445735	0.129681	0.0505278	-0.103236	0.165041	0.151954	0.337047	0.155703	-0.0618515	0.315194	0.151954	0.337047	0.12952	0.234052	0.155703
0.134177	0.16307	0.206203	0.0583098	0.142998	0.141095	0.189004	0.125175	0.077103	607	0.366302	0.403819	0.454096	0.241474	0.378151	0.375627	0.434746	0.3538	0.277674	607	0.187472	0.218209	0.571825	0.19493	0.22478	0.105072	0.170662	0.435453	0.260437	0.43358	0.139554	0.0608028	-0.0322249	0.142846	0.171159	0.445574	0.0883885	-0.00142381	-0.153344	0.106343	0.131255	0.312421	0.125462	-0.10526	0.2708	0.131255	0.312421	0.14035	0.244925	0.125462
0.129365	0.162751	0.213046	0.0543809	0.13762	0.131654	0.193493	0.124091	0.0738446	608	0.359674	0.403424	0.461569	0.233197	0.370972	0.362841	0.439879	0.352265	0.271744	608	0.171672	0.222783	0.555451	0.172543	0.21688	0.113691	0.168112	0.430151	0.252446	0.428081	0.103698	0.0564086	-0.0329243	0.144552	0.160062	0.429634	0.111878	-0.00627265	-0.142271	0.0993488	0.135951	0.262189	0.122003	-0.109422	0.274815	0.135951	0.262189	0.164287	0.232592	0.122003
0.124589	0.157489	0.207147	0.0514537	0.127884	0.144124	0.198424	0.131753	0.0773866	609	0.352971	0.396849	0.455134	0.226834	0.357609	0.379636	0.445449	0.362977	0.278184	609	0.169043	0.218733	0.555206	0.170246	0.220034	0.112934	0.168146	0.431091	0.234749	0.42778	0.0944484	0.0630689	-0.0366328	0.145501	0.167083	0.426314	0.105428	0.0030268	-0.142041	0.0975326	0.132217	0.261284	0.123721	-0.110038	0.274877	0.132217	0.261284	0.16336	0.23292	0.123721
0.12774	0.160359	0.211219	0.0525168	0.128208	0.13297	0.195376	0.113566	0.0773942	610	0.357407	0.400449	0.459586	0.229165	0.358062	0.364651	0.442013	0.336996	0.278198	610	0.177363	0.22547	0.554806	0.162495	0.228304	0.125646	0.179792	0.443456	0.243927	0.436034	0.0981663	0.0569238	-0.0321272	0.140877	0.171636	0.431122	0.102539	0.00147282	-0.128228	0.0988983	0.14447	0.252811	0.133413	-0.0965169	0.290234	0.14447	0.252811	0.174188	0.253985	0.133413
0.126222	0.155904	0.204018	0.0559679	0.137196	0.138623	0.19855	0.126296	0.0766269	611	0.355278	0.394847	0.451684	0.236575	0.3704	0.372321	0.445589	0.355382	0.276816	611	0.177975	0.224385	0.553573	0.163211	0.22861	0.125434	0.18181	0.442	0.234513	0.445059	0.105931	0.061105	-0.0384894	0.15372	0.157523	0.423208	0.111987	0.00615658	-0.127532	0.117715	0.1482	0.244137	0.128521	-0.0973094	0.27513	0.1482	0.244137	0.182041	0.241738	0.128521
0.13115	0.161678	0.204946	0.0560241	0.135636	0.1393	0.197098	0.125303	0.0802438	612	0.362146	0.402092	0.45271	0.236694	0.368289	0.37323	0.443957	0.353982	0.283273	612	0.18956	0.216141	0.557863	0.187155	0.23362	0.128206	0.190995	0.454109	0.228947	0.446217	0.126557	0.0655646	-0.0397442	0.160469	0.169256	0.427059	0.104074	0.00578942	-0.123135	0.116751	0.145333	0.241144	0.127825	-0.105717	0.274126	0.145333	0.241144	0.171689	0.249276	0.127825
0.130158	0.155044	0.21461	0.0497022	0.131502	0.137679	0.202874	0.119775	0.0734922	613	0.360775	0.393756	0.46326	0.22294	0.362633	0.371051	0.450415	0.346085	0.271094	613	0.180628	0.217237	0.549207	0.185587	0.229705	0.122315	0.188476	0.445632	0.239053	0.444991	0.117382	0.0640621	-0.0465308	0.159467	0.157925	0.436765	0.1001	0.0112352	-0.117838	0.119866	0.159578	0.22954	0.128852	-0.108929	0.273842	0.159578	0.22954	0.166552	0.2458	0.128852
0.124825	0.154649	0.206851	0.0564526	0.132796	0.135418	0.199643	0.127276	0.0778303	614	0.353306	0.393254	0.454809	0.237598	0.364413	0.367992	0.446815	0.356758	0.278981	614	0.170783	0.171237	0.549267	0.190438	0.215519	0.124333	0.168783	0.416587	0.242976	0.450703	0.116138	0.065971	-0.0494778	0.163065	0.161196	0.455817	0.0965063	0.0194088	-0.145449	0.1458	0.179567	0.225363	0.134473	-0.0883187	0.268551	0.179567	0.225363	0.176806	0.238866	0.134473
0.139272	0.161504	0.213717	0.0614747	0.139078	0.144296	0.203789	0.128463	0.0810731	615	0.373192	0.401875	0.462296	0.247941	0.372932	0.379864	0.45143	0.358418	0.284733	615	0.170648	0.170838	0.551009	0.190175	0.21308	0.132041	0.173365	0.425338	0.240903	0.431735	0.117464	0.0562834	-0.0546327	0.160155	0.156837	0.455048	0.0961518	0.0201322	-0.144279	0.147099	0.182005	0.22162	0.149646	-0.089615	0.265457	0.182005	0.22162	0.177778	0.239424	0.149646
0.125187	0.15909	0.223324	0.0573803	0.141237	0.141822	0.191983	0.127484	0.0783617	616	0.353818	0.398861	0.472572	0.239542	0.375815	0.376593	0.438158	0.35705	0.279932	616	0.150298	0.156626	0.519172	0.169691	0.190993	0.0887657	0.155743	0.39292	0.235714	0.421286	0.109148	0.0475636	-0.0786976	0.150816	0.135609	0.445395	0.105193	0.038577	-0.176628	0.130726	0.145522	0.201001	0.123752	-0.149764	0.25026	0.145522	0.201001	0.152096	0.228067	0.123752
0.130657	0.155512	0.209641	0.0517282	0.128463	0.137422	0.181793	0.115525	0.0749057	617	0.361465	0.39435	0.457866	0.227438	0.358417	0.370704	0.426372	0.33989	0.273689	617	0.130711	0.159193	0.530168	0.178939	0.182618	0.0792466	0.168691	0.405135	0.253144	0.40659	0.100901	0.0777146	-0.046409	0.106031	0.11375	0.426896	0.0756293	0.0417421	-0.160902	0.0957973	0.114999	0.183027	0.113531	-0.148955	0.238971	0.114999	0.183027	0.154785	0.215123	0.113531
0.130481	0.167221	0.205136	0.0572631	0.126314	0.13709	0.192481	0.122692	0.0755319	618	0.361222	0.408927	0.45292	0.239297	0.355407	0.370257	0.438726	0.350275	0.274831	618	0.121435	0.169673	0.553592	0.191812	0.212687	0.0961943	0.209656	0.435493	0.249693	0.397201	0.101117	0.0707054	-0.046075	0.102439	0.101779	0.436624	0.0826516	0.0549016	-0.154318	0.113902	0.130509	0.181933	0.143382	-0.155031	0.253678	0.130509	0.181933	0.142521	0.207692	0.143382
0.132145	0.158337	0.215881	0.0556192	0.140146	0.140793	0.194298	0.129558	0.0778297	619	0.363517	0.397916	0.46463	0.235837	0.37436	0.375223	0.440792	0.359942	0.27898	619	0.0996159	0.182943	0.556258	0.204799	0.214048	0.0970618	0.218151	0.438941	0.248924	0.36975	0.132518	0.0662127	-0.0501924	0.101056	0.0869346	0.450552	0.0814208	0.0582403	-0.151353	0.120779	0.13957	0.207025	0.144695	-0.15545	0.263715	0.13957	0.207025	0.145766	0.208505	0.144695
0.13046	0.162547	0.211034	0.0537921	0.135251	0.13299	0.204762	0.127049	0.0775801	620	0.361193	0.403172	0.459384	0.231931	0.367766	0.364678	0.452506	0.35644	0.278532	620	0.0957978	0.167594	0.554796	0.195654	0.2121	0.104323	0.19485	0.434981	0.23996	0.368001	0.126691	0.0647019	-0.0429163	0.0869056	0.0830571	0.431217	0.061607	0.0420275	-0.172261	0.12284	0.120708	0.202546	0.148826	-0.12468	0.228777	0.120708	0.202546	0.148743	0.183672	0.148826
0.133156	0.158968	0.202602	0.0533668	0.136319	0.145301	0.190183	0.130436	0.0779028	621	0.364906	0.398707	0.450113	0.231013	0.369214	0.381184	0.4361	0.361159	0.279111	621	0.10079	0.161827	0.550566	0.213192	0.215713	0.0879451	0.182413	0.435474	0.231109	0.365069	0.149211	0.0723821	-0.0764172	0.0697815	0.0783319	0.431397	0.0534476	0.0445275	-0.186189	0.120791	0.114277	0.192809	0.149382	-0.128846	0.228876	0.114277	0.192809	0.128133	0.158344	0.149382
0.133315	0.143213	0.202834	0.0548693	0.1419	0.140833	0.194398	0.12179	0.0782084	622	0.365123	0.378434	0.450371	0.234242	0.376696	0.375277	0.440906	0.348985	0.279658	622	0.0619561	0.18351	0.52685	0.198683	0.17644	0.112141	0.183678	0.441944	0.220542	0.37452	0.147088	0.0774721	-0.092034	0.0459002	0.0469585	0.420724	0.0553342	0.044315	-0.175279	0.136669	0.133294	0.195018	0.160127	-0.138736	0.220541	0.133294	0.195018	0.125761	0.148599	0.160127
0.133419	0.149921	0.199993	0.0524248	0.132801	0.145892	0.184355	0.119896	0.0727722	623	0.365265	0.387196	0.447206	0.228965	0.364418	0.381959	0.429366	0.346259	0.269763	623	0.0978874	0.184397	0.525288	0.176617	0.172833	0.107183	0.191334	0.436473	0.190413	0.414754	0.176212	0.107146	-0.0851141	0.0456476	0.0898058	0.387541	0.0720621	0.0396397	-0.171659	0.130268	0.128724	0.17316	0.171081	-0.13872	0.224786	0.128724	0.17316	0.120265	0.155286	0.171081
0.130447	0.157645	0.210108	0.0557188	0.145183	0.126255	0.195897	0.124586	0.0725746	624	0.361174	0.397045	0.458375	0.236048	0.381029	0.355324	0.442602	0.352967	0.269397	624	0.108032	0.197062	0.535261	0.172536	0.153808	0.126211	0.201673	0.443586	0.187135	0.410084	0.180172	0.122673	-0.0985864	0.0419953	0.088159	0.377158	0.087619	0.0616866	-0.195538	0.127106	0.126207	0.160304	0.175438	-0.135518	0.220302	0.126207	0.160304	0.0983586	0.158915	0.175438
0.11849	0.151759	0.199416	0.053598	0.133966	0.131519	0.182361	0.132794	0.0752685	625	0.344224	0.389563	0.446561	0.231512	0.366014	0.362656	0.427038	0.364409	0.274351	625	0.102784	0.180645	0.532383	0.156711	0.170356	0.127473	0.19992	0.446227	0.187866	0.406964	0.173847	0.130229	-0.105425	0.0415889	0.0900202	0.366187	0.0919072	0.0523237	-0.216344	0.127061	0.125496	0.143525	0.191832	-0.139534	0.219503	0.125496	0.143525	0.0766191	0.160329	0.191832
0.137058	0.156465	0.213123	0.0579115	0.137183	0.129343	0.197303	0.124783	0.0815656	626	0.370213	0.395557	0.461653	0.240648	0.370383	0.359643	0.444188	0.353246	0.285597	626	0.0955083	0.162137	0.545473	0.168054	0.157807	0.0987733	0.243241	0.467037	0.184353	0.407054	0.173545	0.127771	-0.11276	0.0487288	0.0906902	0.368289	0.092878	0.0456925	-0.235324	0.145909	0.12856	0.146625	0.190829	-0.141756	0.223935	0.12856	0.146625	0.0752436	0.166268	0.190829
0.124393	0.16102	0.214241	0.0531343	0.135144	0.14225	0.190861	0.127485	0.0799407	627	0.352695	0.401272	0.462862	0.230509	0.367619	0.37716	0.436877	0.35705	0.282738	627	0.0992159	0.159304	0.53211	0.151432	0.188916	0.0813065	0.24483	0.44351	0.203319	0.413721	0.166566	0.138135	-0.115829	0.0503924	0.0962153	0.369884	0.0826413	0.0615376	-0.240787	0.145878	0.127352	0.132326	0.215599	-0.159035	0.224085	0.127352	0.132326	0.067943	0.164513	0.215599
0.12999	0.160423	0.210652	0.0557277	0.134654	0.138719	0.18619	0.127934	0.0769508	628	0.360541	0.400528	0.458968	0.236067	0.366953	0.372449	0.431497	0.357679	0.2774	628	0.102048	0.171445	0.527829	0.168235	0.199642	0.0864999	0.244488	0.461186	0.187942	0.418545	0.13661	0.124475	-0.120276	0.0469444	0.0787193	0.365561	0.102745	0.0571636	-0.22998	0.132729	0.111032	0.1141	0.21472	-0.162326	0.227428	0.111032	0.1141	0.0914266	0.134428	0.21472
0.13014	0.161383	0.216564	0.0551011	0.139529	0.143593	0.192487	0.128289	0.0796458	629	0.36075	0.401725	0.465364	0.234736	0.373536	0.378936	0.438733	0.358175	0.282216	629	0.094688	0.161345	0.521737	0.164202	0.197309	0.0933476	0.236879	0.457572	0.188072	0.414471	0.135	0.119809	-0.113142	0.0418131	0.0689451	0.368104	0.107659	0.0528802	-0.22769	0.140435	0.105969	0.113875	0.210426	-0.156813	0.225667	0.105969	0.113875	0.0940434	0.135132	0.210426
0.131542	0.163325	0.209508	0.0546883	0.131215	0.135444	0.189137	0.127721	0.0730831	630	0.362687	0.404135	0.45772	0.233855	0.362236	0.368028	0.434899	0.357381	0.270339	630	0.0894011	0.153429	0.519992	0.153723	0.192451	0.0917836	0.230937	0.452899	0.173508	0.414542	0.114436	0.112664	-0.117086	0.0290817	0.0474512	0.359165	0.0948406	0.0353086	-0.230112	0.132314	0.0867585	0.0987035	0.210805	-0.159563	0.217147	0.0867585	0.0987035	0.0944753	0.126775	0.210805
0.125237	0.167851	0.211499	0.0559458	0.129887	0.131851	0.185746	0.129936	0.0739024	631	0.353888	0.409696	0.45989	0.236529	0.360398	0.363113	0.430982	0.360466	0.27185	631	0.0718986	0.150644	0.510379	0.157615	0.19331	0.0998485	0.223314	0.456871	0.172067	0.417967	0.119544	0.115262	-0.122587	0.0204514	0.0445968	0.357865	0.0956818	0.0356556	-0.229573	0.131043	0.0860173	0.0992624	0.211312	-0.170837	0.216667	0.0860173	0.0992624	0.0930881	0.129313	0.211312
0.127257	0.148297	0.203923	0.0529495	0.138937	0.146213	0.190412	0.130023	0.0762404	632	0.356731	0.385094	0.451578	0.230108	0.372743	0.382378	0.436363	0.360587	0.276117	632	0.0837116	0.153235	0.510312	0.155348	0.19092	0.096464	0.2272	0.446759	0.161565	0.417136	0.131539	0.140337	-0.0978071	0.0100019	0.0630501	0.346615	0.0997241	0.0379704	-0.226176	0.120688	0.0793393	0.0965579	0.228435	-0.150835	0.231329	0.0793393	0.0965579	0.0856472	0.127614	0.228435
0.131299	0.164578	0.217245	0.0538439	0.132856	0.147518	0.197736	0.123302	0.0745108	633	0.362353	0.405682	0.466095	0.232043	0.364494	0.384081	0.444675	0.351144	0.272967	633	0.129691	0.188204	0.522715	0.175052	0.206699	0.123041	0.238599	0.455263	0.213306	0.438139	0.1752	0.181409	-0.0481871	0.0448206	0.0947248	0.367398	0.132628	0.0682604	-0.179352	0.14265	0.102234	0.11539	0.244359	-0.123222	0.242967	0.102234	0.11539	0.108495	0.123078	0.244359
0.13201	0.152589	0.205973	0.0545203	0.137632	0.150806	0.198472	0.124787	0.0753833	634	0.363331	0.390627	0.453843	0.233496	0.370988	0.388338	0.445502	0.353253	0.27456	634	0.103572	0.176868	0.51847	0.172102	0.196687	0.102034	0.246521	0.441964	0.194155	0.439085	0.176941	0.148945	-0.0631001	0.0414159	0.0906941	0.367443	0.13296	0.0444786	-0.194323	0.143731	0.0978726	0.115192	0.244889	-0.127266	0.243769	0.0978726	0.115192	0.108415	0.122609	0.244889
0.121506	0.171164	0.188371	0.0497294	0.128383	0.134613	0.198011	0.110119	0.0700168	635	0.348577	0.41372	0.434018	0.223001	0.358306	0.366896	0.444984	0.331841	0.264607	635	0.110769	0.187836	0.518245	0.156104	0.171502	0.0867564	0.247911	0.442562	0.199805	0.442157	0.175164	0.157236	-0.0640899	0.0452708	0.0971866	0.371029	0.125146	0.0458537	-0.198211	0.149996	0.109733	0.107425	0.238904	-0.135379	0.244525	0.109733	0.107425	0.101271	0.115959	0.238904
0.132281	0.158313	0.222325	0.0586849	0.144511	0.144112	0.193299	0.125642	0.078688	636	0.363705	0.397885	0.471514	0.24225	0.380146	0.37962	0.439658	0.35446	0.280514	636	0.138065	0.157347	0.507232	0.150436	0.181364	0.10599	0.23937	0.437817	0.299404	0.501136	0.200461	0.140861	-0.108781	0.0852802	0.122715	0.354462	0.103869	0.0329045	-0.184708	0.0754325	0.0869915	0.0966761	0.233559	-0.125684	0.21132	0.0869915	0.0966761	0.114045	0.105716	0.233559
0.135568	0.158779	0.203349	0.0601287	0.14111	0.139246	0.188007	0.122063	0.0770855	637	0.368196	0.398471	0.450942	0.245212	0.375646	0.373157	0.433598	0.349375	0.277643	637	0.130057	0.129122	0.494673	0.126923	0.158124	0.101084	0.237674	0.428557	0.284526	0.495602	0.187267	0.126505	-0.112328	0.082739	0.113088	0.328076	0.0533855	0.0190481	-0.187069	0.0586681	0.0362998	0.0507128	0.210677	-0.133086	0.204413	0.0362998	0.0507128	0.108542	0.0992509	0.210677
0.136256	0.161403	0.210227	0.0567295	0.124482	0.138451	0.192247	0.116329	0.0723648	638	0.369128	0.401749	0.458505	0.23818	0.35282	0.372089	0.438459	0.341071	0.269007	638	0.131178	0.135252	0.464533	0.0913815	0.156825	0.113401	0.235502	0.397199	0.283336	0.487042	0.171031	0.129746	-0.106874	0.0770717	0.0904591	0.352506	0.0641385	0.0197008	-0.190291	0.0597013	0.0457192	0.00477058	0.199439	-0.123297	0.215231	0.0457192	0.00477058	0.120695	0.10461	0.199439
0.126246	0.157103	0.205615	0.0525072	0.132734	0.135017	0.185736	0.116291	0.0703615	639	0.355311	0.396362	0.453448	0.229144	0.364327	0.367447	0.430971	0.341014	0.265257	639	0.104105	0.130992	0.449194	0.13407	0.148933	0.115147	0.271622	0.411192	0.278387	0.475803	0.199926	0.121965	-0.108615	0.0962736	0.0937222	0.355574	0.0684515	0.0345467	-0.172172	0.0633011	0.0612147	0.0280232	0.200251	-0.116831	0.235769	0.0612147	0.0280232	0.120651	0.0850686	0.200251
0.126672	0.162259	0.208611	0.0534909	0.138581	0.133794	0.187183	0.127311	0.067912	640	0.355911	0.402814	0.45674	0.231281	0.372265	0.365778	0.432647	0.356806	0.260599	640	0.105428	0.137716	0.447793	0.137204	0.15104	0.121655	0.275003	0.414996	0.279958	0.477972	0.200521	0.122661	-0.100523	0.106555	0.100463	0.351139	0.0754874	0.0395784	-0.155809	0.0659689	0.0699495	0.0276156	0.199809	-0.119111	0.234894	0.0699495	0.0276156	0.127623	0.088658	0.199809
0.124107	0.159359	0.209875	0.0567576	0.136824	0.14262	0.18912	0.126131	0.0772486	641	0.352289	0.399198	0.458121	0.238239	0.369898	0.377651	0.43488	0.355149	0.277936	641	0.106265	0.13898	0.448563	0.140291	0.147333	0.116501	0.276186	0.417697	0.280475	0.479793	0.183944	0.12538	-0.0925509	0.0961756	0.126436	0.353486	0.0775639	0.0354717	-0.159523	0.0659194	0.0710369	0.0358306	0.188372	-0.130919	0.236158	0.0710369	0.0358306	0.122198	0.0821082	0.188372
0.13096	0.160445	0.212666	0.0555343	0.135741	0.137028	0.203136	0.13034	0.0785457	642	0.361884	0.400556	0.461158	0.235657	0.368431	0.370173	0.450706	0.361026	0.28026	642	0.117404	0.149918	0.472179	0.127485	0.148385	0.120891	0.27867	0.436295	0.279628	0.472209	0.171112	0.111248	-0.0875668	0.0911191	0.117119	0.356209	0.0679236	0.0286704	-0.15503	0.0647848	0.072426	0.0111114	0.16775	-0.120864	0.23105	0.072426	0.0111114	0.121266	0.0753123	0.16775
0.124194	0.156868	0.209949	0.0537018	0.129875	0.12999	0.188393	0.114802	0.068945	643	0.352412	0.396065	0.458202	0.231736	0.360382	0.360541	0.434043	0.338825	0.262574	643	0.109577	0.128374	0.477755	0.111418	0.15922	0.0860512	0.253587	0.417794	0.268009	0.465934	0.160787	0.110956	-0.117939	0.0712417	0.0964086	0.333472	0.0672865	0.0154882	-0.160233	0.0616854	0.0637364	-0.00417464	0.178637	-0.155958	0.206413	0.0637364	-0.00417464	0.115548	0.0701935	0.178637
0.139102	0.15565	0.217833	0.0558837	0.133823	0.142476	0.204162	0.11969	0.0725896	644	0.372964	0.394525	0.466726	0.236397	0.365818	0.37746	0.451842	0.345962	0.269425	644	0.102266	0.112289	0.474865	0.122312	0.164502	0.0812255	0.255962	0.418943	0.285025	0.466586	0.131582	0.0961466	-0.109883	0.0647685	0.0932088	0.334456	0.0228797	-0.0110412	-0.148586	0.0405536	0.0501897	-0.0120938	0.173277	-0.153205	0.205915	0.0501897	-0.0120938	0.103654	0.08852	0.173277
0.123922	0.150393	0.217049	0.050929	0.139128	0.144417	0.183686	0.130669	0.0776196	645	0.352026	0.387805	0.465885	0.225675	0.372999	0.380022	0.428586	0.361481	0.278603	645	0.104377	0.0732236	0.432263	0.102345	0.0942621	0.0313522	0.288867	0.405179	0.279725	0.447047	0.121775	0.069778	-0.118523	0.0707824	0.0796941	0.321502	0.0194078	-0.0277523	-0.183116	0.0504077	0.0527418	-0.0029054	0.185871	-0.184185	0.208416	0.0527418	-0.0029054	0.0958779	0.0872082	0.185871
0.130174	0.155542	0.211236	0.0542062	0.129699	0.131861	0.187013	0.126407	0.0761141	646	0.360796	0.394388	0.459605	0.232822	0.360138	0.363126	0.43245	0.355538	0.275888	646	0.0983977	0.0823567	0.429258	0.102874	0.105296	0.02371	0.300816	0.416764	0.260457	0.442756	0.194011	0.0777105	-0.0978485	0.0706856	0.0992472	0.330355	-0.0347255	-0.051011	-0.178659	0.0342688	0.0277306	0.0206826	0.201188	-0.189617	0.220656	0.0277306	0.0206826	0.146432	0.0542875	0.201188
0.122535	0.154797	0.21257	0.0521972	0.135993	0.132207	0.19284	0.12727	0.070553	647	0.35005	0.393442	0.461053	0.228467	0.368772	0.363602	0.439135	0.356749	0.265618	647	0.0953394	0.0766419	0.426939	0.10708	0.111022	0.0285501	0.294827	0.411323	0.255508	0.443473	0.193578	0.0881894	-0.0988945	0.0630597	0.0939792	0.324711	-0.0297323	-0.0537828	-0.171719	0.0334354	0.0225437	0.0200392	0.211767	-0.190949	0.211671	0.0225437	0.0200392	0.146693	0.0613054	0.211767
0.126186	0.153939	0.202712	0.0516981	0.133346	0.130877	0.183461	0.127842	0.0757353	648	0.355226	0.39235	0.450235	0.227372	0.365166	0.36177	0.428324	0.35755	0.2752	648	0.102345	0.0850572	0.42799	0.111951	0.102242	0.0342358	0.295715	0.399874	0.253504	0.448054	0.184268	0.0779689	-0.0919666	0.0468487	0.0849269	0.327812	-0.0366114	-0.051535	-0.173175	0.0255913	0.0269213	0.0175568	0.201352	-0.184217	0.202696	0.0269213	0.0175568	0.139285	0.0639912	0.201352
0.131246	0.160764	0.205488	0.052386	0.13064	0.130147	0.196049	0.12857	0.0759984	649	0.362279	0.400954	0.453308	0.22888	0.361441	0.36076	0.442774	0.358567	0.275678	649	0.104238	0.0823147	0.425376	0.113608	0.104326	0.03663	0.296089	0.397692	0.241917	0.438225	0.191535	0.0948195	-0.0737772	0.0643042	0.10299	0.330972	-0.0438875	-0.069259	-0.191763	0.0108177	0.0103964	0.0120978	0.184781	-0.199007	0.18965	0.0103964	0.0120978	0.153739	0.0777632	0.184781
0.135256	0.144663	0.211865	0.0553184	0.127784	0.139661	0.196349	0.121336	0.0771773	650	0.367772	0.380346	0.460288	0.235199	0.357469	0.373713	0.443113	0.348333	0.277808	650	0.0881088	0.0843591	0.426169	0.11791	0.11264	0.0282668	0.287482	0.386867	0.244659	0.453817	0.198295	0.119518	-0.0970746	0.0511189	0.0694962	0.328368	-0.0442751	-0.0697131	-0.190579	0.0122431	0.0111706	0.0133576	0.196238	-0.208471	0.19219	0.0111706	0.0133576	0.154393	0.0815766	0.196238
0.129727	0.148784	0.193343	0.0523474	0.138472	0.133041	0.202448	0.125801	0.0786567	651	0.360176	0.385725	0.439708	0.228796	0.372119	0.364748	0.449943	0.354684	0.280458	651	0.135522	0.0722799	0.424817	0.151898	0.108652	0.01667	0.300912	0.37709	0.256037	0.490896	0.211778	0.155916	-0.0723704	0.0488723	0.105935	0.321597	-0.0354305	-0.0730743	-0.196139	0.0146348	0.00386984	0.048579	0.210082	-0.202452	0.195251	0.00386984	0.048579	0.171117	0.0802369	0.210082
0.122868	0.154965	0.21382	0.0537642	0.128582	0.12808	0.194017	0.114005	0.0684699	652	0.350525	0.393656	0.462406	0.231871	0.358583	0.357882	0.440473	0.337646	0.261668	652	0.142077	0.0890992	0.427377	0.141761	0.111246	0.000813772	0.296802	0.368826	0.250255	0.492392	0.226904	0.155842	-0.065303	0.049201	0.117315	0.325271	-0.00751396	-0.0773405	-0.172356	0.0218816	0.0334166	0.0597059	0.210996	-0.20667	0.191736	0.0334166	0.0597059	0.136542	0.0622236	0.210996
0.121918	0.150995	0.206075	0.0530796	0.134032	0.131255	0.193669	0.123091	0.069704	653	0.349168	0.388581	0.453955	0.23039	0.366104	0.362291	0.440078	0.350843	0.264015	653	0.154399	0.121212	0.447912	0.114154	0.119788	0.0220918	0.297757	0.380653	0.253311	0.494119	0.221852	0.166762	-0.0611366	0.0626297	0.131984	0.339073	-0.0175059	-0.0508707	-0.160872	0.0519605	0.0693882	0.0435791	0.229283	-0.189849	0.212186	0.0693882	0.0435791	0.12779	0.0406991	0.229283
0.130921	0.156777	0.210349	0.056434	0.131768	0.131069	0.186089	0.130492	0.0780486	654	0.36183	0.395951	0.458638	0.237558	0.362999	0.362035	0.43138	0.361237	0.279372	654	0.155678	0.11964	0.452439	0.118731	0.115088	0.0233157	0.290307	0.366216	0.244347	0.494005	0.22065	0.164924	-0.0728666	0.04061	0.109441	0.337184	-0.0171891	-0.0513265	-0.154784	0.0589284	0.0754006	0.0429505	0.230443	-0.192614	0.204869	0.0754006	0.0429505	0.125963	0.0407303	0.230443
0.127079	0.154379	0.205973	0.0522393	0.137536	0.145149	0.201236	0.136048	0.0822194	655	0.356482	0.392911	0.453842	0.228559	0.370858	0.380985	0.448594	0.368847	0.286739	655	0.152065	0.128642	0.447585	0.122455	0.125268	0.0298754	0.288195	0.36286	0.246207	0.491735	0.222932	0.171394	-0.0689962	0.0393588	0.106877	0.342176	-0.00960826	-0.0394954	-0.153823	0.0887876	0.103852	0.0467193	0.243028	-0.18615	0.200581	0.103852	0.0467193	0.124838	0.0474168	0.243028
0.129331	0.146068	0.209363	0.0563509	0.129508	0.140554	0.186973	0.128101	0.0744872	656	0.359626	0.382188	0.457562	0.237383	0.359872	0.374906	0.432404	0.357912	0.272923	656	0.14962	0.118687	0.444198	0.116593	0.12645	0.0175146	0.285524	0.374532	0.247019	0.492886	0.221541	0.167319	-0.0725073	0.0337817	0.100248	0.343492	-0.00278958	-0.0445222	-0.138265	0.0997295	0.0992175	0.0504644	0.247654	-0.180424	0.212493	0.0992175	0.0504644	0.114412	0.0255998	0.247654
0.131512	0.154906	0.212468	0.0544603	0.136063	0.137027	0.193739	0.124333	0.0756132	657	0.362645	0.393582	0.460943	0.233367	0.368867	0.370172	0.440158	0.352609	0.274979	657	0.16403	0.117058	0.4402	0.126658	0.123008	0.0289729	0.281825	0.372467	0.253019	0.51728	0.256149	0.197864	-0.0435265	0.0588015	0.111455	0.342617	0.00573588	-0.0454201	-0.129526	0.0981116	0.0979681	0.0717503	0.242142	-0.159902	0.205331	0.0979681	0.0717503	0.156899	0.050783	0.242142
0.11817	0.149866	0.203903	0.0477813	0.129219	0.137846	0.198139	0.113802	0.0694872	658	0.343759	0.387125	0.451556	0.218589	0.359471	0.371276	0.445128	0.337345	0.263604	658	0.163851	0.121659	0.445586	0.133687	0.134281	0.0269149	0.257913	0.353982	0.25279	0.516679	0.25607	0.198889	-0.0447044	0.054022	0.107085	0.345155	0.00853827	-0.0397589	-0.131125	0.0874021	0.0888282	0.0768717	0.248129	-0.16017	0.192145	0.0888282	0.0768717	0.155424	0.0386893	0.248129
0.126178	0.156484	0.212805	0.0565952	0.128122	0.134653	0.177042	0.117305	0.0704645	659	0.355215	0.39558	0.461308	0.237897	0.357941	0.36695	0.420764	0.342498	0.265452	659	0.146298	0.107423	0.412271	0.13722	0.143292	0.0464599	0.22538	0.333757	0.259978	0.522856	0.235835	0.20643	-0.0339763	0.0521748	0.111333	0.351576	-0.00635826	-0.0324975	-0.122671	0.0876939	0.093517	0.0553767	0.267794	-0.136106	0.168399	0.093517	0.0553767	0.154601	0.0231808	0.267794
0.127142	0.15699	0.218797	0.053945	0.144416	0.137922	0.189153	0.122771	0.0718197	660	0.35657	0.39622	0.467757	0.232261	0.380021	0.371379	0.434918	0.350387	0.267992	660	0.149346	0.107245	0.417221	0.136347	0.143926	0.0574125	0.229319	0.335823	0.254247	0.519794	0.23889	0.20719	0.00339982	0.0662833	0.119505	0.343922	-8.95709e-05	-0.0334254	-0.105389	0.096947	0.098883	0.0663263	0.269931	-0.0961042	0.189434	0.098883	0.0663263	0.129615	0.0130044	0.269931
0.130386	0.160728	0.206262	0.0539307	0.132038	0.153133	0.182723	0.117709	0.0731984	661	0.36109	0.400909	0.454161	0.23223	0.363371	0.391322	0.427461	0.343087	0.270552	661	0.149197	0.104842	0.414607	0.135136	0.14405	0.0590536	0.228487	0.335963	0.245455	0.52807	0.233657	0.218359	0.0122427	0.0934229	0.138595	0.338735	-0.0376358	-0.0414683	-0.101561	0.0997735	0.104937	0.0649342	0.28332	-0.0858709	0.216155	0.104937	0.0649342	0.142389	0.0272223	0.28332
0.124734	0.156868	0.21155	0.0564679	0.139362	0.149059	0.190737	0.111569	0.0698146	662	0.353177	0.396065	0.459946	0.23763	0.373312	0.386081	0.436734	0.33402	0.264224	662	0.121163	0.130155	0.423004	0.145556	0.111003	0.0801325	0.249815	0.325496	0.228792	0.511204	0.227683	0.18761	0.0274089	0.102487	0.139415	0.352598	-0.0235079	-0.0495733	-0.0923845	0.111836	0.0969817	0.0734395	0.274742	-0.0735802	0.229667	0.0969817	0.0734395	0.147162	0.0334348	0.274742
0.12329	0.150708	0.206447	0.055471	0.134491	0.135325	0.188396	0.117346	0.0703158	663	0.351127	0.388212	0.454364	0.235523	0.366731	0.367866	0.434047	0.342558	0.265171	663	0.142539	0.13847	0.448963	0.14019	0.119672	0.0933065	0.260384	0.306587	0.227857	0.515562	0.211583	0.171507	0.0370187	0.132751	0.138025	0.348975	-0.0365283	-0.0708369	-0.0884584	0.134731	0.100389	0.0443152	0.243111	-0.0597708	0.28217	0.100389	0.0443152	0.144381	0.0637046	0.243111
0.130188	0.15961	0.213279	0.0569922	0.132361	0.134564	0.202136	0.123152	0.0799087	664	0.360816	0.399512	0.461822	0.23873	0.363815	0.36683	0.449595	0.35093	0.282681	664	0.137838	0.145991	0.462491	0.149181	0.122432	0.0917142	0.255774	0.304615	0.213481	0.512139	0.204157	0.171096	0.0351411	0.129699	0.134456	0.361346	-0.014393	-0.0671746	-0.0840809	0.137044	0.105331	0.0504526	0.241799	-0.053881	0.298655	0.105331	0.0504526	0.147564	0.0716954	0.241799
0.123647	0.152107	0.198994	0.048689	0.126642	0.131312	0.191496	0.124159	0.0723086	665	0.351635	0.390008	0.446088	0.220656	0.355868	0.36237	0.437603	0.352362	0.268903	665	0.130908	0.130433	0.448495	0.140062	0.12713	0.0762605	0.249501	0.287151	0.199703	0.499026	0.198807	0.173603	0.0140068	0.126574	0.109108	0.353146	-0.0104241	-0.0733052	-0.103912	0.140891	0.0885092	0.051296	0.239643	-0.0876296	0.303968	0.0885092	0.051296	0.145614	0.0761313	0.239643
0.128892	0.153943	0.21036	0.0607932	0.134585	0.138617	0.195845	0.130209	0.0785534	666	0.359015	0.392356	0.45865	0.246563	0.366858	0.372313	0.442544	0.360845	0.280274	666	0.141722	0.133112	0.456313	0.14664	0.118836	0.0726869	0.256945	0.294479	0.206662	0.513428	0.21036	0.166927	0.00992846	0.133634	0.118452	0.352041	-0.0105649	-0.0805336	-0.105409	0.14784	0.0943309	0.0610992	0.220428	-0.0921572	0.318056	0.0943309	0.0610992	0.142317	0.0866071	0.220428
0.125015	0.15478	0.206503	0.0540251	0.128643	0.13022	0.180738	0.122929	0.06957	667	0.353575	0.393421	0.454426	0.232433	0.358668	0.36086	0.425133	0.350612	0.263761	667	0.146002	0.130163	0.458439	0.139363	0.115053	0.0712235	0.265886	0.299504	0.205696	0.53073	0.206275	0.166078	0.0104597	0.143667	0.125898	0.352008	-0.0143789	-0.0857646	-0.110043	0.140469	0.086276	0.0446009	0.20483	-0.122435	0.291588	0.086276	0.0446009	0.136846	0.0700845	0.20483
0.131715	0.164368	0.208392	0.0592394	0.139056	0.129538	0.195701	0.131047	0.0775675	668	0.362926	0.405423	0.4565	0.243391	0.372902	0.359913	0.442381	0.362005	0.278509	668	0.144732	0.130518	0.457664	0.136696	0.113745	0.0664433	0.265918	0.298796	0.197795	0.536144	0.173005	0.174591	0.0477193	0.143532	0.133732	0.34574	-0.00541407	-0.0869402	-0.115195	0.139982	0.0863045	0.0249133	0.214038	-0.0867585	0.291393	0.0863045	0.0249133	0.0792887	0.0668584	0.214038
0.122807	0.151334	0.209813	0.0532117	0.131552	0.134552	0.189021	0.126897	0.07706	669	0.350439	0.389017	0.458053	0.230677	0.362701	0.366813	0.434766	0.356226	0.277597	669	0.110563	0.136872	0.449919	0.085761	0.115228	0.0509001	0.242602	0.260371	0.191424	0.501111	0.153762	0.196708	0.032531	0.11524	0.107717	0.354843	-0.0231035	-0.0881196	-0.119841	0.134634	0.0739591	-0.0335895	0.23659	-0.115627	0.257541	0.0739591	-0.0335895	0.0721477	0.0486886	0.23659
0.1296	0.151594	0.206973	0.0507802	0.13002	0.132631	0.198362	0.125902	0.0803753	670	0.36	0.38935	0.454942	0.225345	0.360583	0.364185	0.445378	0.354827	0.283505	670	0.0924208	0.160461	0.433642	0.0595408	0.0936992	0.0389594	0.241584	0.273186	0.174184	0.506363	0.167096	0.207644	0.0384871	0.118917	0.107983	0.335595	-0.0449747	-0.106359	-0.126146	0.124701	0.0681644	-0.0192928	0.244809	-0.108575	0.25683	0.0681644	-0.0192928	0.0807083	0.0535395	0.244809
0.131629	0.160102	0.204893	0.0539163	0.131706	0.139457	0.18761	0.124942	0.0729507	671	0.362808	0.400128	0.452651	0.232199	0.362913	0.37344	0.43314	0.353471	0.270094	671	0.0941349	0.160966	0.441162	0.0639612	0.0960477	0.0304684	0.238177	0.260385	0.180041	0.507609	0.173058	0.208795	0.0472508	0.125098	0.121914	0.338068	-0.0354253	-0.103437	-0.116944	0.131182	0.0799237	-0.0180601	0.244779	-0.0986263	0.262724	0.0799237	-0.0180601	0.0948029	0.0633065	0.244779
0.12922	0.153637	0.217421	0.0543973	0.13684	0.126459	0.194423	0.12777	0.0766534	672	0.359472	0.391965	0.466284	0.233232	0.369919	0.355611	0.440934	0.357449	0.276863	672	0.0908507	0.167188	0.44688	0.0733865	0.0950573	0.0640771	0.227504	0.26369	0.185647	0.508785	0.178796	0.202672	0.0683502	0.117555	0.12336	0.341196	-0.0332885	-0.0999887	-0.110538	0.131134	0.0817638	-0.0114225	0.245599	-0.0754976	0.256536	0.0817638	-0.0114225	0.103189	0.0620607	0.245599
0.127688	0.15995	0.210785	0.0535369	0.131362	0.132153	0.18693	0.122961	0.0750547	673	0.357335	0.399938	0.459113	0.23138	0.362439	0.363529	0.432354	0.350658	0.273961	673	0.0925776	0.168377	0.433635	0.0624499	0.102514	0.0589286	0.220851	0.24958	0.186898	0.503586	0.174391	0.207107	0.0661298	0.11478	0.117035	0.321671	-0.0516815	-0.0869994	-0.120226	0.118533	0.0562236	-0.0194271	0.262642	-0.0822568	0.248214	0.0562236	-0.0194271	0.0972778	0.052105	0.262642
0.120838	0.151434	0.203175	0.0469919	0.132891	0.137644	0.195193	0.121769	0.0720814	674	0.347618	0.389146	0.450749	0.216776	0.364542	0.371004	0.441806	0.348954	0.26848	674	0.0943138	0.177199	0.452908	0.0372945	0.108909	0.0653923	0.213247	0.240801	0.182994	0.50015	0.167531	0.214761	0.0761106	0.113213	0.103927	0.328172	-0.0622172	-0.0819988	-0.114436	0.115889	0.0491903	-0.0470521	0.266622	-0.0718851	0.23786	0.0491903	-0.0470521	0.0929092	0.0545546	0.266622
0.130903	0.146685	0.20062	0.0506237	0.13785	0.134139	0.203653	0.115058	0.0755223	675	0.361805	0.382994	0.447906	0.224997	0.371282	0.366251	0.45128	0.339202	0.274813	675	0.0965229	0.167125	0.443957	0.0370281	0.114509	0.080026	0.216245	0.24233	0.178828	0.512435	0.16547	0.213229	0.0784235	0.114774	0.103981	0.318444	-0.0540046	-0.0731575	-0.121828	0.107145	0.0485533	-0.0463692	0.283718	-0.0496604	0.24425	0.0485533	-0.0463692	0.0846437	0.0506004	0.283718
0.124178	0.148176	0.193318	0.0490182	0.129015	0.136021	0.189261	0.122556	0.0743953	676	0.352389	0.384937	0.439679	0.221401	0.359187	0.368811	0.435042	0.35008	0.272755	676	0.115442	0.176683	0.463913	0.0243215	0.128453	0.075902	0.22867	0.226925	0.175218	0.514115	0.177472	0.222529	0.109988	0.0988309	0.11193	0.314955	-0.0468589	-0.0700817	-0.1071	0.098163	0.0556552	-0.0373474	0.297476	-0.0134862	0.227421	0.0556552	-0.0373474	0.062632	0.0683504	0.297476
0.13073	0.145966	0.190159	0.0521636	0.137977	0.136503	0.194963	0.125797	0.073196	677	0.361567	0.382055	0.436072	0.228393	0.371453	0.369463	0.441547	0.354678	0.270548	677	0.106009	0.164736	0.470889	0.0310939	0.125391	0.0387649	0.243722	0.219708	0.170429	0.505136	0.172792	0.226208	0.115988	0.0928302	0.118659	0.295114	-0.0565512	-0.0629541	-0.0975395	0.0929948	0.0709836	-0.0376042	0.302522	-0.036169	0.238782	0.0709836	-0.0376042	0.0481906	0.0748369	0.302522
0.127181	0.149384	0.210238	0.0516722	0.13649	0.129172	0.186511	0.124703	0.0711057	678	0.356624	0.386502	0.458517	0.227315	0.369446	0.359405	0.431869	0.353133	0.266657	678	0.135804	0.202419	0.481207	0.0102822	0.119396	0.0566271	0.221041	0.21495	0.169534	0.51857	0.172722	0.228861	0.165524	0.0736651	0.1201	0.310261	-0.0380554	-0.0530442	-0.0558887	0.0947764	0.0797732	-0.0452396	0.300385	-0.00136667	0.218622	0.0797732	-0.0452396	0.0228465	0.0741708	0.300385
0.119875	0.152328	0.203954	0.0497526	0.130468	0.142542	0.189431	0.124671	0.0699031	679	0.34623	0.390293	0.451613	0.223053	0.361204	0.377547	0.435237	0.353088	0.264392	679	0.139505	0.201497	0.481384	0.0140859	0.123927	0.0576327	0.221407	0.217885	0.174365	0.524409	0.195371	0.229204	0.159532	0.0836334	0.125271	0.313497	-0.0325041	-0.0475589	-0.0544518	0.09553	0.0839321	-0.00338409	0.301758	-0.00772214	0.229925	0.0839321	-0.00338409	0.0167878	0.0927689	0.301758
0.126902	0.146501	0.211875	0.0533785	0.131361	0.136189	0.186935	0.117528	0.0690962	680	0.356234	0.382754	0.460299	0.231038	0.362437	0.369038	0.43236	0.342824	0.262861	680	0.15091	0.213209	0.487947	0.0224783	0.154584	0.0675059	0.227239	0.195263	0.180163	0.530838	0.198764	0.232022	0.163483	0.0831029	0.121142	0.323469	-0.0259424	-0.0383571	-0.0466812	0.0966641	0.0734234	0.00521747	0.32644	0.00255728	0.233291	0.0734234	0.00521747	0.0210988	0.0934586	0.32644
0.116294	0.150931	0.211137	0.050134	0.124745	0.123691	0.194167	0.115228	0.0708519	681	0.341019	0.388499	0.459497	0.223906	0.353193	0.351697	0.440644	0.339452	0.26618	681	0.157903	0.214985	0.489803	0.0266915	0.164352	0.0697813	0.230639	0.201904	0.191536	0.540174	0.203476	0.245313	0.160838	0.0750511	0.11641	0.324801	-0.0213921	-0.02277	-0.0423693	0.104006	0.0845016	0.0106365	0.334074	0.00592593	0.238214	0.0845016	0.0106365	0.0221283	0.0935927	0.334074
0.133849	0.149552	0.219798	0.0534287	0.130707	0.138276	0.185528	0.13009	0.0736769	682	0.365854	0.38672	0.468826	0.231146	0.361535	0.371855	0.43073	0.36068	0.271435	682	0.160102	0.236179	0.493099	-0.006484	0.108774	0.0971421	0.201992	0.185374	0.192517	0.539	0.20312	0.243238	0.161502	0.0747844	0.115201	0.33158	-0.0144834	-0.0132654	-0.0452873	0.115198	0.085966	-0.00540638	0.302658	0.021451	0.226429	0.085966	-0.00540638	0.0225016	0.0799241	0.302658
0.129502	0.146636	0.20796	0.0530556	0.129082	0.138683	0.193579	0.123308	0.0762533	683	0.359864	0.38293	0.456026	0.230338	0.35928	0.372402	0.439976	0.351153	0.27614	683	0.168042	0.20692	0.491414	-0.00515557	0.0917282	0.114123	0.177299	0.174431	0.202156	0.541989	0.202818	0.2483	0.157488	0.0809901	0.119641	0.327604	-0.0135582	-0.0265524	-0.0364038	0.092147	0.0812748	-0.00507121	0.299835	0.0240806	0.221228	0.0812748	-0.00507121	0.0222252	0.0817136	0.299835
0.128658	0.152504	0.225356	0.0546477	0.127844	0.133519	0.189502	0.120484	0.0706101	684	0.35869	0.390518	0.474717	0.233769	0.357553	0.365402	0.435319	0.347108	0.265726	684	0.178678	0.214537	0.491957	-0.00600895	0.0933481	0.109429	0.18972	0.172451	0.20668	0.547974	0.199258	0.258539	0.16277	0.0853635	0.134022	0.33007	-0.0191451	-0.0120937	-0.0371436	0.115597	0.0934245	-0.00599417	0.300959	0.0220346	0.225991	0.0934245	-0.00599417	0.0239822	0.0714424	0.300959
0.134455	0.162618	0.206297	0.0577004	0.131102	0.147407	0.177494	0.129625	0.0725394	685	0.366681	0.403259	0.4542	0.240209	0.36208	0.383936	0.421301	0.360035	0.269331	685	0.175372	0.20251	0.474746	0.0015736	0.0714487	0.121034	0.184745	0.179751	0.207704	0.547937	0.200164	0.256013	0.158306	0.0875089	0.134109	0.31072	-0.00314769	-0.0194596	-0.0327011	0.126425	0.1094	-0.00289182	0.316003	0.00718592	0.23821	0.1094	-0.00289182	0.0281384	0.0663214	0.316003
0.125135	0.146837	0.210182	0.0518576	0.129644	0.130776	0.187223	0.111197	0.0658065	686	0.353745	0.383194	0.458456	0.227723	0.360061	0.361629	0.432693	0.333462	0.256528	686	0.13903	0.20488	0.469253	0.0154733	0.016353	0.154651	0.169513	0.195012	0.208528	0.511311	0.20421	0.220027	0.201088	0.062569	0.133101	0.310206	-0.00113926	-0.0246934	-0.0317525	0.12679	0.111093	0.0192348	0.261238	0.0310504	0.226228	0.111093	0.0192348	0.0220872	0.0732237	0.261238
0.125087	0.1565	0.206823	0.0516659	0.137569	0.143619	0.188485	0.122712	0.0720823	687	0.353677	0.395601	0.454778	0.227301	0.370903	0.378971	0.434149	0.350303	0.268481	687	0.139175	0.205394	0.468361	0.0156327	0.0165722	0.153983	0.168496	0.187833	0.219361	0.515685	0.205752	0.222285	0.191423	0.0678373	0.142465	0.314435	0.00397816	-0.0176836	-0.0333427	0.158341	0.143492	0.0225461	0.264878	0.0258312	0.242159	0.143492	0.0225461	0.0175688	0.0784747	0.264878
0.122927	0.161897	0.209882	0.054589	0.131728	0.127786	0.195995	0.121798	0.0768815	688	0.350609	0.402364	0.458129	0.233643	0.362943	0.357472	0.442713	0.348996	0.277275	688	0.135054	0.202109	0.451751	0.0154674	0.012664	0.15541	0.165667	0.188913	0.230183	0.533807	0.199494	0.233964	0.173787	0.0806387	0.129428	0.328249	0.00423906	-0.000971806	-0.0440951	0.166397	0.134674	0.0297295	0.30425	-0.000262724	0.256081	0.134674	0.0297295	0.01704	0.0803937	0.30425
0.127252	0.15214	0.210928	0.0530372	0.12799	0.142933	0.184083	0.122535	0.0723064	689	0.356724	0.390051	0.459269	0.230298	0.357757	0.378065	0.429049	0.35005	0.268898	689	0.162807	0.193902	0.46175	-0.00786838	0.0161102	0.125421	0.153951	0.169263	0.211679	0.527151	0.177318	0.26037	0.131012	0.0749073	0.08071	0.319751	0.0151209	0.000677901	-0.0338606	0.171185	0.136633	0.0214838	0.317957	-0.0180704	0.254764	0.136633	0.0214838	0.050641	0.090125	0.317957
0.124402	0.156577	0.213554	0.0539612	0.125623	0.130491	0.186605	0.128868	0.0749332	690	0.352707	0.395698	0.462119	0.232295	0.354433	0.361236	0.431978	0.358982	0.273739	690	0.137437	0.201915	0.466768	-0.0067872	0.0310007	0.144586	0.158785	0.169085	0.203172	0.515243	0.178685	0.249809	0.12551	0.0709525	0.0783414	0.321633	0.0191702	-0.00658374	-0.0208845	0.173494	0.137115	0.0234258	0.321088	-0.00684741	0.25706	0.137115	0.0234258	0.0452587	0.0903027	0.321088
0.130376	0.166193	0.209716	0.0555495	0.139167	0.143512	0.194869	0.119697	0.0722058	691	0.361076	0.407668	0.457947	0.235689	0.373051	0.37883	0.441439	0.345972	0.268711	691	0.129373	0.198486	0.468879	-0.00760291	0.0284978	0.128806	0.157395	0.168874	0.198863	0.507879	0.188044	0.255313	0.142964	0.0634697	0.0715847	0.313909	0.0304538	-0.0010408	-0.00628887	0.16317	0.128482	0.0320723	0.325359	-0.00396059	0.248551	0.128482	0.0320723	0.0384544	0.103873	0.325359
0.126743	0.159783	0.205426	0.0545039	0.132724	0.133039	0.195215	0.12509	0.070822	692	0.35601	0.399729	0.45324	0.233461	0.364314	0.364745	0.441832	0.35368	0.266124	692	0.103021	0.192333	0.45864	-0.0248427	0.00661357	0.121912	0.161267	0.168885	0.188458	0.493409	0.158663	0.218765	0.130304	0.0731161	0.0714267	0.307593	0.0212935	-0.0135541	-0.0108265	0.164206	0.128136	0.0143763	0.31059	-0.0123038	0.241888	0.128136	0.0143763	0.0292893	0.108243	0.31059
0.124004	0.144531	0.192711	0.0502979	0.126422	0.142301	0.198006	0.122807	0.072361	693	0.352142	0.380172	0.438989	0.224272	0.355558	0.377228	0.444979	0.350439	0.269	693	0.111861	0.169203	0.461864	-0.0317393	0.0246231	0.110644	0.161362	0.162302	0.164737	0.489392	0.14806	0.235328	0.110717	0.0677952	0.0698079	0.291413	0.0285945	-0.0382444	-0.00117542	0.157531	0.135552	0.00738549	0.318277	-0.0253135	0.238761	0.135552	0.00738549	0.0302129	0.105288	0.318277
0.129594	0.15397	0.211232	0.0563601	0.139022	0.125798	0.190654	0.122385	0.0753941	694	0.359991	0.39239	0.4596	0.237403	0.372857	0.354679	0.436639	0.349836	0.27458	694	0.100438	0.176712	0.467317	-0.02079	0.0406389	0.10439	0.174165	0.172795	0.14282	0.478228	0.132315	0.253453	0.129373	0.0615698	0.0654387	0.292747	0.0238216	-0.00229531	0.0116018	0.170239	0.147073	0.0119554	0.33878	-0.0254258	0.247805	0.147073	0.0119554	0.0334107	0.117152	0.33878
0.126027	0.153033	0.199638	0.0520057	0.134472	0.14017	0.19625	0.127773	0.0725276	695	0.355003	0.391195	0.446809	0.228048	0.366705	0.374392	0.443001	0.357453	0.269309	695	0.0935865	0.182055	0.462701	-0.0332479	0.0505253	0.116183	0.180415	0.170216	0.133669	0.473145	0.124984	0.262932	0.125494	0.0601133	0.0580474	0.294184	0.0181901	0.00102881	0.0409192	0.182349	0.154426	-0.0108608	0.363663	-0.0122195	0.256526	0.154426	-0.0108608	0.0377542	0.119987	0.363663
0.119565	0.150049	0.202333	0.0519555	0.136164	0.142769	0.182125	0.13147	0.0729652	696	0.345782	0.387361	0.449814	0.227937	0.369003	0.377848	0.426761	0.362588	0.270121	696	0.068799	0.184987	0.465986	-0.0187362	0.0399413	0.152608	0.196289	0.199691	0.132357	0.457433	0.10537	0.263555	0.0717592	0.0339105	0.0184188	0.296542	0.0243817	0.00935459	0.0508396	0.19175	0.156296	-0.00513352	0.36086	0.00614195	0.262299	0.156296	-0.00513352	0.0617817	0.127031	0.36086
0.11841	0.157321	0.206058	0.0515179	0.140606	0.135918	0.197276	0.115484	0.0701618	697	0.344107	0.396637	0.453936	0.226976	0.374974	0.368671	0.444157	0.339829	0.264881	697	0.0722512	0.189697	0.484541	0.00782474	0.0938075	0.133414	0.226312	0.225813	0.134246	0.456348	0.110861	0.272885	0.0686102	0.0383961	0.0260536	0.303699	0.0343034	0.0299978	0.0446951	0.202084	0.166825	0.0147735	0.39304	-0.0016622	0.2653	0.166825	0.0147735	0.0671417	0.114955	0.39304
0.131168	0.146131	0.199898	0.0520185	0.121566	0.137454	0.200151	0.120114	0.07705	698	0.362172	0.382271	0.4471	0.228076	0.348663	0.370747	0.447383	0.346574	0.277579	698	0.123018	0.182101	0.495356	0.0311241	0.0908765	0.145037	0.222632	0.230517	0.122778	0.465331	0.0874908	0.25127	0.0530136	0.0668018	0.042541	0.298662	0.0319343	0.0313808	0.0435435	0.201873	0.164355	0.0132633	0.386463	-0.00326677	0.2724	0.164355	0.0132633	0.0498536	0.138579	0.386463
0.130467	0.152314	0.200896	0.0524284	0.138458	0.12732	0.189479	0.120679	0.0722519	699	0.361202	0.390274	0.448214	0.228972	0.3721	0.356819	0.435292	0.347389	0.268797	699	0.136833	0.193292	0.497564	0.0549262	0.0780435	0.126874	0.229253	0.210211	0.119519	0.467754	0.0616245	0.261402	0.0736906	0.0609664	0.0684831	0.300539	0.0177891	0.037801	0.0553101	0.199097	0.177377	0.0166098	0.386358	-0.00615114	0.272949	0.177377	0.0166098	0.0538572	0.140694	0.386358
0.123338	0.150082	0.205117	0.0497374	0.136616	0.130696	0.194353	0.114742	0.0705563	700	0.351195	0.387404	0.452899	0.223019	0.369617	0.361519	0.440855	0.338736	0.265624	700	0.134071	0.206343	0.495789	0.0357038	0.0911225	0.104529	0.236845	0.202373	0.121355	0.467223	0.0579591	0.265184	0.0713139	0.0619138	0.0674688	0.303282	0.0241242	0.0342858	0.0444495	0.199884	0.175882	0.0113545	0.391441	-0.00893643	0.27444	0.175882	0.0113545	0.0557615	0.144851	0.391441
0.123	0.160136	0.217302	0.0540123	0.13138	0.134766	0.197783	0.123774	0.0725902	701	0.350714	0.40017	0.466156	0.232405	0.362464	0.367105	0.444728	0.351816	0.269426	701	0.134274	0.206306	0.495181	0.0335164	0.0904652	0.104783	0.230091	0.199629	0.120174	0.46856	0.0421236	0.264871	0.0665267	0.0528716	0.062446	0.303281	0.0294239	0.0344101	0.0462975	0.204089	0.177519	0.00622069	0.390591	-0.00869199	0.258755	0.177519	0.00622069	0.0794065	0.201188	0.390591
0.125567	0.157157	0.197009	0.0499331	0.133102	0.127547	0.206657	0.123336	0.0794937	702	0.354354	0.39643	0.443857	0.223457	0.364831	0.357138	0.454596	0.351192	0.281946	702	0.141202	0.204417	0.503055	0.0336305	0.0951981	0.119696	0.23287	0.211066	0.0951172	0.460255	0.0401663	0.260221	0.0477131	0.0471031	0.0568393	0.287919	0.0273724	0.0242994	0.0208212	0.198373	0.165196	0.00467847	0.38876	-0.0155802	0.257201	0.165196	0.00467847	0.0776868	0.200683	0.38876
0.129807	0.16327	0.207293	0.0567062	0.131958	0.130311	0.182268	0.133037	0.0733989	703	0.360287	0.404067	0.455294	0.238131	0.36326	0.360985	0.426929	0.364743	0.270922	703	0.139197	0.177761	0.50451	0.0111856	0.0912564	0.12469	0.23537	0.220761	0.105996	0.471381	0.0335566	0.272728	0.0207926	0.0442714	0.031099	0.275224	0.0457147	0.0188358	0.0395101	0.195641	0.18347	0.0022352	0.384254	0.000546984	0.260878	0.18347	0.0022352	0.0631488	0.19403	0.384254
0.124232	0.14384	0.202637	0.0505451	0.126951	0.129213	0.199228	0.122128	0.072818	704	0.352466	0.379263	0.450152	0.224822	0.356302	0.359461	0.446349	0.349468	0.269848	704	0.115923	0.173549	0.493297	0.00830421	0.0992465	0.131515	0.214869	0.208193	0.100587	0.446254	0.0285999	0.287972	0.0450272	-0.00566008	0.016915	0.273753	0.0448714	0.0194837	0.0439752	0.19278	0.181996	-0.00278173	0.398811	0.0205959	0.22765	0.181996	-0.00278173	0.0658148	0.193244	0.398811
0.125062	0.1519	0.2111	0.0508079	0.128131	0.133278	0.186708	0.127008	0.0721391	705	0.353641	0.389743	0.459456	0.225406	0.357954	0.365073	0.432097	0.356382	0.268587	705	0.128784	0.161935	0.48658	0.00809892	0.103699	0.117203	0.213169	0.220726	0.0885313	0.4403	0.0207324	0.286701	0.0499802	-0.00452275	0.0363602	0.273907	0.0430008	0.0147005	0.0565423	0.192572	0.172483	-0.00504877	0.396369	0.0280209	0.228068	0.172483	-0.00504877	0.075341	0.194288	0.396369
0.126233	0.146203	0.194276	0.0514346	0.135077	0.131115	0.205608	0.114458	0.0678015	706	0.355293	0.382365	0.440768	0.226792	0.367528	0.362098	0.45344	0.338317	0.260387	706	0.134767	0.161762	0.471602	-0.00237528	0.106585	0.0891686	0.216696	0.218968	0.0871082	0.436287	0.0178733	0.287317	0.0407201	-0.00529168	0.0358577	0.275478	0.0457584	0.0133401	0.0563697	0.185718	0.170862	-0.00127073	0.394221	0.0379409	0.228589	0.170862	-0.00127073	0.0857306	0.196412	0.394221
0.122914	0.155451	0.192137	0.0503115	0.140953	0.150266	0.199469	0.128901	0.0730323	707	0.350591	0.394273	0.438335	0.224302	0.375437	0.387641	0.44662	0.359028	0.270245	707	0.138325	0.16719	0.471494	-0.00533821	0.107412	0.0822927	0.224007	0.224145	0.062514	0.440797	0.0290867	0.295727	0.0711694	-0.0257646	0.0376237	0.268305	0.0514165	-0.00301773	0.0774132	0.176952	0.146206	0.00141204	0.397795	0.0447957	0.225126	0.146206	0.00141204	0.074033	0.206274	0.397795
0.127448	0.160377	0.199275	0.0577887	0.12605	0.139932	0.18672	0.126743	0.0733551	708	0.356999	0.400471	0.446402	0.240393	0.355035	0.374074	0.432111	0.356009	0.270841	708	0.144482	0.157052	0.473051	0.00146094	0.126512	0.0803488	0.235161	0.226777	0.0749263	0.448889	0.0124424	0.282121	0.051367	-0.0355134	0.0331938	0.243625	0.0834687	0.0531492	0.117193	0.194996	0.155807	0.0118087	0.435819	0.0313075	0.244986	0.155807	0.0118087	0.045829	0.185363	0.435819
0.127064	0.149441	0.214068	0.0533639	0.133191	0.138992	0.193365	0.122972	0.0725653	709	0.35646	0.386576	0.462675	0.231006	0.364954	0.372816	0.439733	0.350674	0.269379	709	0.138442	0.163041	0.470705	0.00923626	0.119994	0.085434	0.232162	0.225552	0.0900198	0.443374	0.0432041	0.271562	0.0783045	-0.0263211	0.0463268	0.267809	0.0780318	0.0661552	0.115258	0.203635	0.161184	0.042937	0.421897	0.0546437	0.243118	0.161184	0.042937	0.0495619	0.201985	0.421897
0.124484	0.150047	0.198587	0.0519213	0.134098	0.137891	0.186497	0.123741	0.0709039	710	0.352824	0.387359	0.445631	0.227862	0.366193	0.371337	0.431853	0.351768	0.266278	710	0.115715	0.16974	0.472446	0.0169692	0.115169	0.0892062	0.250861	0.237171	0.0777155	0.431065	0.0340111	0.27029	0.0710829	-0.04793	0.0307481	0.266004	0.0789478	0.051809	0.11301	0.214348	0.166722	0.043969	0.416772	0.053455	0.24954	0.166722	0.043969	0.0501273	0.209218	0.416772
0.127965	0.158781	0.201859	0.0563787	0.131415	0.135354	0.190008	0.11835	0.0705714	711	0.357722	0.398473	0.449287	0.237442	0.362512	0.367905	0.435899	0.34402	0.265653	711	0.109736	0.165489	0.469998	0.0201124	0.106909	0.0900646	0.235331	0.225956	0.084494	0.431713	0.0283377	0.281219	0.0694249	-0.0293379	0.0438628	0.270156	0.0798249	0.072172	0.109208	0.229268	0.175996	0.040773	0.416985	0.053883	0.249333	0.175996	0.040773	0.0532716	0.1913	0.416985
0.122237	0.148545	0.210782	0.052814	0.122944	0.133737	0.192207	0.119566	0.0696249	712	0.349624	0.385416	0.45911	0.229813	0.350633	0.365701	0.438414	0.345783	0.263865	712	0.0996279	0.169961	0.463045	0.0212691	0.102802	0.0891817	0.241492	0.228289	0.0963226	0.419446	0.038917	0.281157	0.0684033	-0.0189003	0.0503334	0.288393	0.0893673	0.0828104	0.110574	0.228011	0.178057	0.0584096	0.421607	0.052774	0.266388	0.178057	0.0584096	0.0544507	0.192574	0.421607
0.126493	0.159046	0.213544	0.0567127	0.130098	0.139459	0.193983	0.125074	0.0767653	713	0.355659	0.398806	0.462108	0.238144	0.360691	0.373442	0.440434	0.353658	0.277065	713	0.0953137	0.161437	0.465193	0.0150193	0.103406	0.0922747	0.236684	0.224197	0.109569	0.422988	0.0359835	0.284116	0.0685871	-0.0157523	0.0522053	0.284821	0.10108	0.0842606	0.101369	0.239307	0.187833	0.0679107	0.420565	0.0492716	0.270557	0.187833	0.0679107	0.0616937	0.189683	0.420565
0.136143	0.152775	0.194098	0.0528909	0.134884	0.133369	0.196176	0.117686	0.0701282	714	0.368976	0.390865	0.440565	0.22998	0.367265	0.365197	0.442917	0.343054	0.264817	714	0.0848799	0.161853	0.466399	0.0248065	0.0919944	0.0946097	0.236973	0.22027	0.085548	0.40023	0.0278333	0.267848	0.0506613	-0.0319459	0.0239389	0.267692	0.116424	0.058768	0.102546	0.237496	0.172865	0.0726295	0.398277	0.0354495	0.262119	0.172865	0.0726295	0.0779144	0.19796	0.398277
0.128027	0.160614	0.206854	0.049546	0.134427	0.130617	0.187928	0.121846	0.0721	715	0.357809	0.400767	0.454812	0.222589	0.366643	0.361409	0.433506	0.349065	0.268514	715	0.087305	0.190222	0.48391	0.0200797	0.0941875	0.0993824	0.261845	0.254877	0.0883034	0.405026	0.0305155	0.269861	0.058521	-0.0273811	0.0368885	0.262879	0.123065	0.0608825	0.106301	0.229374	0.159769	0.0824322	0.400261	0.0602756	0.265228	0.159769	0.0824322	0.0834545	0.204989	0.400261
0.126513	0.152973	0.19107	0.052864	0.128921	0.128526	0.196928	0.124964	0.0768235	716	0.355687	0.391118	0.437116	0.229922	0.359055	0.358506	0.443766	0.353502	0.27717	716	0.0707358	0.188203	0.490415	0.0109864	0.0968541	0.100528	0.261879	0.252872	0.0837219	0.428232	0.0211822	0.269641	0.061098	-0.0337312	0.0304772	0.26511	0.119787	0.0603332	0.10659	0.227525	0.158833	0.0968862	0.384711	0.0594468	0.25702	0.158833	0.0968862	0.0823066	0.18265	0.384711
0.130973	0.140162	0.196799	0.0532729	0.132365	0.126976	0.184408	0.131115	0.0753385	717	0.361902	0.374382	0.443621	0.230809	0.36382	0.356337	0.429427	0.362098	0.274479	717	0.0328989	0.200839	0.482709	-0.0011582	0.0867382	0.0927338	0.272787	0.245027	0.0932674	0.415734	0.0454997	0.286398	0.0542107	-0.0700315	0.0195333	0.283342	0.116454	0.0508655	0.131866	0.2437	0.196389	0.0992803	0.389267	0.0515167	0.249444	0.196389	0.0992803	0.0861659	0.168471	0.389267
0.118358	0.156613	0.201312	0.0491137	0.131149	0.124668	0.189879	0.114578	0.064872	718	0.344032	0.395743	0.448679	0.221616	0.362146	0.353083	0.435751	0.338494	0.2547	718	0.0583217	0.220145	0.478788	-0.00360854	0.10607	0.0916799	0.253214	0.228448	0.076335	0.432025	0.0484916	0.267194	0.0561934	-0.0405608	0.045257	0.293432	0.120173	0.0405124	0.126857	0.269433	0.213943	0.101274	0.404804	0.0406938	0.241073	0.213943	0.101274	0.0751174	0.167059	0.404804
0.133184	0.149864	0.215261	0.0561749	0.134278	0.137952	0.192913	0.127679	0.0766925	719	0.364943	0.387123	0.463962	0.237012	0.36644	0.371419	0.439219	0.357321	0.276934	719	0.0695407	0.213345	0.458773	-0.000648448	0.0976418	0.0962885	0.2452	0.210256	0.0849619	0.453038	0.0457632	0.27973	0.0523489	-0.0297925	0.0700472	0.291802	0.120721	0.0320391	0.127652	0.262794	0.208904	0.100792	0.382142	0.0406076	0.220384	0.208904	0.100792	0.074933	0.171099	0.382142
0.124914	0.152606	0.213273	0.0504235	0.131044	0.130371	0.176562	0.134226	0.0710623	720	0.353432	0.390649	0.461815	0.224552	0.362	0.361069	0.420192	0.366369	0.266575	720	0.0638711	0.181211	0.435226	-0.0200301	0.0679514	0.0861765	0.227187	0.182695	0.11697	0.456156	0.074945	0.302237	0.040009	-0.056283	0.045773	0.269204	0.14076	0.043887	0.105452	0.214053	0.159567	0.0897029	0.364257	0.0271001	0.19641	0.159567	0.0897029	0.058953	0.134966	0.364257
0.122447	0.146946	0.208308	0.0538446	0.12135	0.13539	0.194298	0.127484	0.0712149	721	0.349924	0.383336	0.456408	0.232044	0.348353	0.367954	0.440793	0.357048	0.266861	721	0.0528056	0.190835	0.415159	0.0130555	0.0960834	0.0961997	0.251996	0.198993	0.107682	0.459839	0.0667538	0.294498	0.0493186	-0.0785197	0.0409889	0.269581	0.149338	0.0561875	0.130469	0.199875	0.166145	0.0807751	0.352241	0.0209041	0.200264	0.166145	0.0807751	0.0670582	0.155101	0.352241
0.13609	0.145516	0.213485	0.0510891	0.131819	0.129106	0.199584	0.128896	0.0788743	722	0.368904	0.381465	0.462045	0.226029	0.363069	0.359313	0.446749	0.35902	0.280846	722	0.0534152	0.179764	0.419165	0.00900503	0.099062	0.100573	0.274816	0.21306	0.107717	0.468601	0.0602563	0.299926	0.0541057	-0.0657499	0.0446751	0.264088	0.158163	0.0511555	0.124017	0.16439	0.146034	0.0995165	0.346372	0.0114757	0.183589	0.146034	0.0995165	0.0815075	0.175104	0.346372
0.124355	0.144334	0.215362	0.0474917	0.135313	0.13051	0.191968	0.121713	0.0698656	723	0.35264	0.379913	0.464071	0.217926	0.367849	0.361262	0.438141	0.348874	0.264321	723	0.0602784	0.178806	0.446661	0.0178659	0.116179	0.10166	0.229402	0.168383	0.106976	0.458171	0.0569329	0.295681	0.0514961	-0.051579	0.0602247	0.277638	0.16491	0.0590652	0.132523	0.14058	0.128871	0.107505	0.346927	0.0346339	0.180194	0.128871	0.107505	0.0922725	0.168686	0.346927
0.126248	0.156671	0.215013	0.0517547	0.141252	0.138972	0.184238	0.125589	0.0736106	724	0.355313	0.395816	0.463695	0.227497	0.375836	0.372789	0.42923	0.354385	0.271313	724	0.0349926	0.173356	0.456903	0.00963899	0.136636	0.096622	0.229559	0.185003	0.126254	0.431402	0.0747397	0.253364	0.0611717	-0.0526537	0.0286806	0.305377	0.154451	0.0564718	0.126125	0.138907	0.129149	0.120348	0.35259	0.0423918	0.185802	0.129149	0.120348	0.0886245	0.166592	0.35259
0.124742	0.156195	0.222354	0.0530486	0.13598	0.131239	0.184132	0.12449	0.0737353	725	0.353188	0.395215	0.471544	0.230323	0.368755	0.36227	0.429106	0.352831	0.271543	725	0.0224614	0.161153	0.464679	0.0111521	0.125248	0.122884	0.209935	0.180474	0.110183	0.42496	0.0481691	0.239134	0.0619735	-0.0627654	0.0166456	0.300049	0.126698	0.0351298	0.129578	0.1281	0.116816	0.126556	0.348451	0.062719	0.172808	0.116816	0.126556	0.115966	0.142227	0.348451
0.124827	0.154846	0.208869	0.0522006	0.128563	0.138253	0.194983	0.118636	0.0693753	726	0.353309	0.393505	0.457022	0.228475	0.358557	0.371823	0.441568	0.344436	0.263392	726	0.0693218	0.15983	0.506696	0.0350282	0.137681	0.12028	0.208497	0.207753	0.0865659	0.453827	0.0562869	0.248128	0.0674537	-0.0654251	0.0339833	0.282182	0.105513	0.0363011	0.14804	0.11388	0.0983434	0.146282	0.351307	0.0635157	0.167658	0.0983434	0.146282	0.121927	0.137421	0.351307
0.124183	0.145412	0.19493	0.0510671	0.13374	0.132796	0.191965	0.122455	0.0707099	727	0.352396	0.381329	0.441509	0.22598	0.365705	0.364412	0.438138	0.349936	0.265913	727	0.0523281	0.162675	0.500715	0.0402586	0.122359	0.121803	0.215518	0.213429	0.0570632	0.453224	0.0401778	0.264693	0.0395461	-0.0857242	0.016403	0.272055	0.114281	0.00936306	0.148748	0.128027	0.10956	0.142061	0.35266	0.0538917	0.161301	0.10956	0.142061	0.130295	0.145015	0.35266
0.124066	0.158139	0.200218	0.0545073	0.118904	0.13276	0.185971	0.127278	0.0740729	728	0.35223	0.397666	0.447457	0.233468	0.344825	0.364363	0.431244	0.35676	0.272163	728	0.0487163	0.170414	0.503848	0.0434539	0.13198	0.127616	0.216514	0.217969	0.0435535	0.445507	0.0407999	0.25159	0.0360398	-0.0853996	0.0110635	0.279326	0.128384	0.025865	0.163556	0.135088	0.116039	0.147096	0.361904	0.0630999	0.163186	0.116039	0.147096	0.132841	0.144686	0.361904
0.125594	0.156455	0.219845	0.0549927	0.13516	0.135116	0.190289	0.127856	0.0734243	729	0.354393	0.395544	0.468876	0.234505	0.36764	0.367581	0.436221	0.357569	0.270969	729	0.0438635	0.163972	0.503901	0.0371294	0.137851	0.125929	0.227786	0.215399	0.0536739	0.433032	0.0753802	0.246305	0.0409915	-0.109883	-0.00588138	0.289168	0.125169	0.0239936	0.162901	0.133905	0.122843	0.178412	0.359498	0.0674393	0.146985	0.122843	0.178412	0.130821	0.159911	0.359498
0.128461	0.158868	0.205096	0.0557939	0.129151	0.141371	0.190118	0.121709	0.0729614	730	0.358415	0.398582	0.452875	0.236207	0.359376	0.375993	0.436026	0.348869	0.270114	730	0.0244467	0.160582	0.502238	0.0287004	0.12442	0.122358	0.221981	0.212465	0.0155515	0.413774	0.0703944	0.250823	0.0396521	-0.12856	-0.0201728	0.263332	0.103978	-0.00180645	0.157722	0.104849	0.106286	0.165279	0.348033	0.0624375	0.126717	0.106286	0.165279	0.128968	0.148493	0.348033
0.128468	0.148974	0.205944	0.0501312	0.132819	0.134895	0.200068	0.121466	0.0749815	731	0.358424	0.385971	0.45381	0.2239	0.364444	0.367281	0.44729	0.34852	0.273827	731	0.00593281	0.161388	0.49304	0.0316453	0.102034	0.121828	0.221783	0.207	0.0163956	0.393412	0.0754062	0.219783	0.038725	-0.132697	-0.0314624	0.264666	0.110184	-0.0144728	0.169717	0.10934	0.113233	0.1713	0.318879	0.0585022	0.125162	0.113233	0.1713	0.13586	0.151331	0.318879
0.126893	0.148291	0.208466	0.048604	0.134782	0.131035	0.188269	0.113882	0.0656964	732	0.356221	0.385085	0.45658	0.220463	0.367127	0.361987	0.433899	0.337464	0.256313	732	0.018716	0.137112	0.490229	0.0310473	0.0822057	0.102745	0.223981	0.200978	-0.00576897	0.382923	0.0817468	0.206261	0.0382005	-0.126529	-0.0208853	0.271237	0.096813	0.000307252	0.165806	0.0996124	0.092771	0.169391	0.325997	0.0645401	0.123074	0.092771	0.169391	0.127675	0.152465	0.325997
0.119322	0.137485	0.18943	0.0492125	0.126347	0.129544	0.181206	0.118703	0.0701216	733	0.345431	0.37079	0.435235	0.221839	0.355453	0.359923	0.425684	0.344533	0.264805	733	0.0187574	0.133116	0.502083	0.0260217	0.077433	0.10179	0.231216	0.213508	-0.00571327	0.378557	0.081172	0.208947	0.0387625	-0.123979	-0.0213747	0.280692	0.0926422	-0.00352309	0.165099	0.105724	0.102678	0.182926	0.318088	0.064527	0.0999639	0.102678	0.182926	0.126369	0.15752	0.318088
0.119201	0.156751	0.206256	0.0525513	0.132719	0.132785	0.195574	0.11962	0.0741576	734	0.345254	0.395918	0.454155	0.229241	0.364306	0.364397	0.442237	0.345861	0.272319	734	0.0244245	0.116267	0.513388	0.00557503	0.0724357	0.0904907	0.233878	0.231423	-0.0547759	0.394792	0.0511907	0.204248	0.0148598	-0.125534	0.00231591	0.266361	0.0825089	-0.00672921	0.149882	0.0988786	0.100174	0.154053	0.306842	0.0531345	0.106314	0.100174	0.154053	0.123169	0.148793	0.306842
0.123262	0.150141	0.197028	0.0518611	0.135772	0.13667	0.194546	0.120048	0.0699946	735	0.351088	0.387481	0.443879	0.22773	0.368473	0.369689	0.441074	0.346479	0.264565	735	0.0518437	0.121387	0.530236	0.0227987	0.0873632	0.0952308	0.216156	0.229981	-0.0573779	0.40198	0.0596395	0.211361	-0.00731017	-0.13869	-0.0277315	0.264427	0.0823031	-0.00650028	0.145546	0.0967159	0.0940733	0.164779	0.314675	0.038182	0.08869	0.0940733	0.164779	0.111965	0.134287	0.314675
0.123119	0.162464	0.212821	0.0537377	0.130403	0.126767	0.186526	0.110915	0.0718677	736	0.350883	0.403068	0.461326	0.231814	0.361113	0.356043	0.431886	0.33304	0.268081	736	0.0549388	0.126306	0.538468	0.0252116	0.0799323	0.0932715	0.204172	0.232483	-0.0545862	0.401677	0.0584158	0.208812	-0.00958563	-0.140033	-0.0265157	0.273122	0.0947877	0.00363389	0.156517	0.092699	0.0945447	0.16232	0.302351	0.0323194	0.0793163	0.0945447	0.16232	0.101983	0.134628	0.302351
0.124642	0.152387	0.21699	0.0536656	0.130583	0.142423	0.194104	0.119735	0.0679992	737	0.353046	0.390368	0.465822	0.231658	0.361362	0.37739	0.440572	0.346028	0.260767	737	0.0516267	0.117387	0.544133	0.0404823	0.08793	0.103965	0.207032	0.23585	-0.0858498	0.382746	0.0467649	0.227239	-0.0125858	-0.0939782	-0.0414939	0.253678	0.0731328	0.00317041	0.143819	0.124801	0.0834798	0.169145	0.317177	0.0418396	0.106093	0.0834798	0.169145	0.125025	0.135355	0.317177
0.120327	0.146128	0.209945	0.0528505	0.13295	0.130489	0.191468	0.125854	0.0761319	738	0.346882	0.382267	0.458197	0.229892	0.364624	0.361233	0.437571	0.354759	0.27592	738	0.0616596	0.121076	0.549116	0.0367666	0.0911706	0.105375	0.194184	0.226197	-0.0854179	0.388702	0.0409473	0.229901	-0.0116023	-0.10784	-0.0517051	0.24561	0.0671766	-0.0326534	0.132634	0.118053	0.0875789	0.163045	0.308582	0.0367019	0.0934626	0.0875789	0.163045	0.12193	0.13851	0.308582
0.125613	0.153248	0.197364	0.0512536	0.133587	0.127315	0.183838	0.12373	0.0690675	739	0.354419	0.391468	0.444257	0.226392	0.365496	0.356812	0.428764	0.351752	0.262807	739	0.0621201	0.0819122	0.540881	0.0655777	0.0558686	0.0640042	0.159945	0.215097	-0.0832588	0.395313	0.0464503	0.225001	-0.0122097	-0.105281	-0.0448805	0.23695	0.0383247	-0.00594115	0.156621	0.133982	0.0852757	0.155811	0.30746	0.0330569	0.0859319	0.0852757	0.155811	0.0938446	0.112496	0.30746
0.123808	0.152388	0.197104	0.0531966	0.129796	0.132588	0.183737	0.12106	0.0702588	740	0.351864	0.390369	0.443964	0.230644	0.360272	0.364126	0.428646	0.347937	0.265064	740	0.0599619	0.088672	0.540841	0.0617659	0.0580202	0.0648337	0.156128	0.217979	-0.0716482	0.396436	0.0401148	0.227688	-0.01283	-0.112968	-0.0406389	0.242818	0.0444937	-0.0122597	0.148959	0.137603	0.0827645	0.153613	0.307812	0.0314878	0.0825205	0.0827645	0.153613	0.0979061	0.108961	0.307812
0.127871	0.154037	0.21055	0.055811	0.137069	0.129581	0.18271	0.124862	0.0709809	741	0.357591	0.392475	0.458857	0.236243	0.370228	0.359973	0.427446	0.353359	0.266422	741	0.0527063	0.085877	0.538572	0.0605922	0.048849	0.0730023	0.160726	0.216836	-0.0634619	0.392093	0.0401312	0.228189	-0.01348	-0.116195	-0.0405298	0.255493	0.0454752	-0.00459486	0.141736	0.136305	0.0828312	0.153905	0.304077	0.036575	0.0820399	0.0828312	0.153905	0.0975552	0.108404	0.304077
0.119056	0.151227	0.202144	0.0499399	0.136691	0.136603	0.188423	0.122239	0.0698427	742	0.345045	0.38888	0.449604	0.223472	0.369717	0.369598	0.434077	0.349627	0.264278	742	0.0468617	0.0884043	0.541196	0.0599333	0.0484467	0.0973439	0.154874	0.230751	-0.0710928	0.381798	0.0302846	0.229776	-0.00275659	-0.124676	-0.0378619	0.251517	0.0414444	-0.00453892	0.162052	0.129977	0.0946472	0.142734	0.307875	0.0720955	0.0685516	0.0946472	0.142734	0.11949	0.10002	0.307875
0.132695	0.155258	0.200133	0.0567834	0.129859	0.141512	0.184048	0.118938	0.0718312	743	0.364273	0.394028	0.447362	0.238293	0.36036	0.376181	0.429008	0.344873	0.268014	743	0.0484312	0.0921181	0.541716	0.0658721	0.0537127	0.0956511	0.154949	0.221641	-0.0729745	0.367467	0.0269818	0.227841	-0.00188892	-0.12478	-0.0332218	0.26241	0.0375594	-0.00911362	0.157422	0.126711	0.0842503	0.127442	0.288311	0.0604138	0.0594423	0.0842503	0.127442	0.121352	0.0994722	0.288311
0.129743	0.145801	0.191125	0.0517871	0.142651	0.143539	0.189088	0.130052	0.075837	744	0.360198	0.381839	0.437178	0.227568	0.377691	0.378865	0.434842	0.360627	0.275385	744	0.0177345	0.103476	0.516949	0.0652559	0.015595	0.109534	0.158793	0.211806	-0.0652713	0.350622	0.0241305	0.182832	-0.00903203	-0.101002	-0.026306	0.283616	0.0380687	0.000561354	0.15428	0.125446	0.0873682	0.128292	0.240861	0.0705938	0.0734182	0.0873682	0.128292	0.122288	0.0981094	0.240861
0.1333	0.157646	0.206	0.0493766	0.128241	0.122152	0.19352	0.124939	0.0679399	745	0.365103	0.397047	0.453872	0.222208	0.358107	0.349502	0.439909	0.353467	0.260653	745	0.0204332	0.131515	0.514857	0.0299566	-0.026129	0.108842	0.136693	0.192053	-0.0595062	0.347099	0.0571457	0.218495	-0.0275223	-0.0997946	-0.0175343	0.29866	0.0938977	0.0609465	0.152173	0.161858	0.122818	0.116967	0.232725	0.0694543	0.0641082	0.122818	0.116967	0.106812	0.0513354	0.232725
0.126654	0.141189	0.213975	0.0519118	0.115246	0.134391	0.184177	0.124536	0.0706403	746	0.355885	0.375752	0.462574	0.227842	0.339479	0.366594	0.429159	0.352896	0.265783	746	-0.0142751	0.124399	0.538702	0.0269575	0.0160375	0.08672	0.1138	0.202837	-0.0691278	0.363778	0.0505282	0.258555	-0.0495884	-0.123841	-0.0158868	0.294794	0.0985798	0.061539	0.152259	0.162219	0.129873	0.0987946	0.242265	0.061172	0.0537454	0.129873	0.0987946	0.121667	0.0693944	0.242265
0.125787	0.149672	0.209394	0.051152	0.134626	0.125157	0.195882	0.12732	0.073472	747	0.354664	0.386874	0.457596	0.226168	0.366914	0.353775	0.442585	0.35682	0.271057	747	-0.00424487	0.110229	0.529372	0.0436267	0.00936737	0.0855345	0.105162	0.193151	-0.0462459	0.378961	0.02071	0.274294	-0.0518803	-0.112026	-0.00818489	0.291261	0.15075	0.0456237	0.164409	0.15345	0.134047	0.130277	0.233861	0.0719159	0.052475	0.134047	0.130277	0.126734	0.0990433	0.233861
0.124719	0.14755	0.205591	0.0511191	0.135465	0.141673	0.186273	0.130449	0.0767719	748	0.353156	0.384122	0.453422	0.226095	0.368055	0.376394	0.431594	0.361177	0.277077	748	-0.0286887	0.126396	0.533778	0.0214551	0.0200858	0.0946954	0.104434	0.202223	-0.0829636	0.353728	0.0403416	0.266616	-0.0799058	-0.126654	-0.0363419	0.300831	0.115469	0.0602704	0.179052	0.153247	0.150599	0.115296	0.240024	0.0807956	0.0545158	0.150599	0.115296	0.0971326	0.0777568	0.240024
0.125473	0.146725	0.213942	0.0547472	0.127806	0.125354	0.182393	0.113129	0.066032	749	0.354221	0.383047	0.462538	0.233981	0.3575	0.354053	0.427075	0.336347	0.256967	749	-0.0159033	0.125017	0.508269	0.0454999	0.0256785	0.0810784	0.124657	0.186381	-0.0814891	0.352179	0.0482926	0.28245	-0.0822257	-0.117876	-0.0339697	0.299155	0.113271	0.0540585	0.178628	0.149856	0.146081	0.106638	0.235945	0.0829358	0.0434566	0.146081	0.106638	0.0921409	0.0722318	0.235945
0.126601	0.145822	0.206325	0.0495474	0.131428	0.127602	0.19749	0.122485	0.0785323	750	0.35581	0.381866	0.45423	0.222592	0.36253	0.357214	0.444398	0.349978	0.280236	750	-0.0144674	0.0984937	0.491468	0.040492	0.0416749	0.0833528	0.154035	0.203834	-0.0746261	0.363739	0.0476651	0.278355	-0.084737	-0.124091	-0.0395387	0.288327	0.127314	0.0535491	0.192205	0.142731	0.154383	0.118602	0.245696	0.0973609	0.0526491	0.154383	0.118602	0.0911876	0.0547151	0.245696
0.122733	0.142095	0.205278	0.0482388	0.124473	0.125976	0.186846	0.122272	0.0692947	751	0.350332	0.376954	0.453076	0.219633	0.352807	0.35493	0.432257	0.349674	0.263239	751	-0.0104187	0.0960999	0.494805	0.039967	0.0470491	0.0727784	0.15058	0.189347	-0.0756867	0.363704	0.0418175	0.270796	-0.0791988	-0.121128	-0.027816	0.281789	0.14827	0.0696377	0.191064	0.136617	0.150685	0.107152	0.237145	0.10072	0.0551906	0.150685	0.107152	0.0934983	0.0465904	0.237145
0.125978	0.149779	0.203711	0.0512138	0.124001	0.132782	0.195978	0.126496	0.0738299	752	0.354933	0.387013	0.451344	0.226305	0.352137	0.364393	0.442694	0.355662	0.271717	752	0.00891844	0.10864	0.508618	0.0279563	0.0609217	0.0665832	0.143114	0.180331	-0.0545569	0.375712	0.0164601	0.275774	-0.0857001	-0.122812	-0.0393511	0.30095	0.13948	0.0838541	0.184982	0.12923	0.143913	0.077852	0.248489	0.0895347	0.0477146	0.143913	0.077852	0.0973508	0.0545082	0.248489
0.119095	0.149013	0.195366	0.048563	0.137815	0.128119	0.184802	0.118427	0.06729	753	0.345101	0.386022	0.442003	0.22037	0.371234	0.357937	0.429886	0.344132	0.259403	753	0.00755289	0.107996	0.507511	0.0355609	0.0558157	0.0577218	0.135147	0.172497	-0.0427616	0.367406	0.021475	0.290208	-0.0670131	-0.1172	-0.0540764	0.299199	0.142138	0.0906198	0.191055	0.131266	0.1381	0.0817284	0.242973	0.0833562	0.0427258	0.1381	0.0817284	0.11232	0.0684067	0.242973
0.127603	0.160227	0.202638	0.0534931	0.131881	0.134841	0.184376	0.114781	0.0680253	754	0.357215	0.400284	0.450153	0.231286	0.363155	0.367207	0.429391	0.338793	0.260817	754	-0.00258447	0.114944	0.505678	0.0528579	0.0454098	0.0661085	0.133847	0.172984	-0.0651658	0.361892	0.0104126	0.299092	-0.0820307	-0.118344	-0.0631498	0.294132	0.173795	0.067363	0.208805	0.128727	0.141748	0.0956377	0.237452	0.0847984	0.0405697	0.141748	0.0956377	0.126963	0.0765533	0.237452
0.129548	0.155402	0.222765	0.0549062	0.133758	0.136854	0.189061	0.133051	0.0791076	755	0.359928	0.394211	0.47198	0.234321	0.36573	0.369937	0.434812	0.364761	0.281261	755	-0.0265944	0.115968	0.496627	0.0483963	0.0337405	0.0706806	0.148576	0.179955	-0.0567894	0.352638	-0.00202564	0.276686	-0.0811603	-0.0973135	-0.0327341	0.300669	0.172934	0.0670913	0.205823	0.12764	0.146775	0.0885874	0.223044	0.0862163	0.0550059	0.146775	0.0885874	0.129583	0.0829378	0.223044
0.123191	0.15364	0.215947	0.0536047	0.134639	0.1316	0.198269	0.126171	0.0700667	756	0.350986	0.391969	0.464701	0.231527	0.366932	0.362767	0.445274	0.355205	0.264701	756	-0.0435945	0.0827074	0.485098	0.0309248	0.00778074	0.0642226	0.112429	0.140708	-0.0925188	0.341117	-0.0186558	0.257889	-0.0883393	-0.13942	-0.077398	0.272134	0.145245	0.0186073	0.200115	0.053431	0.0643303	0.0610792	0.191582	0.0752239	0.0016794	0.0643303	0.0610792	0.132274	0.0682153	0.191582
0.124596	0.14207	0.204625	0.0511219	0.117879	0.127512	0.179237	0.118872	0.0715401	757	0.352981	0.376922	0.452355	0.226102	0.343335	0.357089	0.423364	0.344778	0.26747	757	-0.0486711	0.0742342	0.48028	0.030663	0.00344799	0.0646283	0.132542	0.162804	-0.113743	0.332519	-0.0289823	0.254968	-0.106218	-0.156379	-0.0816996	0.253052	0.128609	0.0100574	0.173933	0.0204928	0.0549755	0.0481786	0.187136	0.0546538	-0.019658	0.0549755	0.0481786	0.119459	0.0578341	0.187136
0.11869	0.150363	0.199699	0.0498452	0.126555	0.128132	0.18908	0.127587	0.0733775	758	0.344515	0.387767	0.446877	0.22326	0.355745	0.357956	0.434834	0.357193	0.270883	758	-0.0376923	0.0650362	0.47815	0.0425956	0.00432314	0.0706609	0.137762	0.156509	-0.118876	0.338519	-0.0550077	0.250594	-0.119963	-0.155151	-0.0797599	0.250929	0.135847	0.0125545	0.176438	0.0142911	0.0588953	0.0576339	0.188826	0.0592042	-0.0186712	0.0588953	0.0576339	0.0990909	0.0536225	0.188826
0.1299	0.146021	0.198624	0.0502073	0.139024	0.131037	0.187484	0.120284	0.0699382	759	0.360416	0.382127	0.445672	0.22407	0.372859	0.36199	0.432994	0.34682	0.264458	759	-0.0287248	0.0565846	0.483331	0.0435018	0.014492	0.074959	0.144461	0.162515	-0.121031	0.345117	-0.0483505	0.259298	-0.119035	-0.168537	-0.0877182	0.240588	0.129611	0.00257307	0.176365	0.0270085	0.0673474	0.0642141	0.204013	0.0623771	-0.0270449	0.0673474	0.0642141	0.102161	0.0573758	0.204013
0.127813	0.157237	0.205673	0.0533045	0.130463	0.135305	0.207852	0.126873	0.0740491	760	0.35751	0.396531	0.453512	0.230878	0.361196	0.367838	0.455908	0.356192	0.27212	760	-0.0221555	0.0680484	0.48879	0.0155665	0.00841935	0.0741879	0.144594	0.164001	-0.12447	0.344877	-0.0407015	0.261239	-0.118818	-0.166257	-0.0879271	0.242691	0.14036	0.0060601	0.180884	0.0212833	0.0697741	0.0615182	0.204753	0.0667558	-0.0325033	0.0697741	0.0615182	0.0934212	0.0666752	0.204753
0.125291	0.144437	0.204914	0.0485709	0.128612	0.125797	0.187679	0.112073	0.0679108	761	0.353964	0.380048	0.452674	0.220388	0.358625	0.354679	0.433219	0.334773	0.260597	761	-0.0438559	0.0638002	0.481416	0.0149054	-0.00462242	0.0420704	0.12472	0.14324	-0.134108	0.329562	-0.0468379	0.24221	-0.177248	-0.189574	-0.107675	0.23959	0.140103	0.00143507	0.176018	0.0133953	0.0615637	0.0607816	0.192939	0.0313389	-0.0551222	0.0615637	0.0607816	0.090891	0.0560531	0.192939
0.119603	0.157017	0.192565	0.0493581	0.127857	0.135847	0.188002	0.118989	0.0736961	762	0.345837	0.396254	0.438822	0.222167	0.35757	0.368575	0.433592	0.344948	0.27147	762	-0.0394734	0.0675672	0.489581	0.0111402	-0.000243296	0.0281319	0.14428	0.153407	-0.132268	0.324898	-0.0467343	0.23829	-0.169077	-0.206456	-0.113307	0.248598	0.12665	0.00263552	0.137466	0.0353851	0.0806305	0.0534771	0.188215	0.0150387	-0.0590737	0.0806305	0.0534771	0.110279	0.0428079	0.188215
0.118576	0.145318	0.202439	0.048276	0.134227	0.134196	0.185736	0.118425	0.0746826	763	0.344349	0.381206	0.449932	0.219718	0.36637	0.366328	0.430971	0.34413	0.273281	763	-0.0297245	0.059585	0.488783	0.00970353	0.00730888	0.0292947	0.142787	0.161685	-0.117014	0.327063	-0.0423066	0.205289	-0.137357	-0.209298	-0.127476	0.246811	0.123869	0.0286861	0.13138	0.0337651	0.100692	0.0526708	0.194965	0.0142714	-0.0596237	0.100692	0.0526708	0.109143	0.0421296	0.194965
0.123835	0.155659	0.191847	0.0496871	0.125497	0.132859	0.189885	0.122178	0.0715045	764	0.351901	0.394537	0.438003	0.222906	0.354256	0.364498	0.435757	0.34954	0.267403	764	-0.0341176	0.0585709	0.485549	0.0168867	0.0160174	0.0279454	0.140064	0.176763	-0.107355	0.320395	-0.0367093	0.207103	-0.128928	-0.208581	-0.12049	0.241936	0.125207	0.0232521	0.140715	0.0366623	0.102063	0.0600309	0.206785	0.0100556	-0.0639368	0.102063	0.0600309	0.111142	0.046337	0.206785
0.122066	0.148973	0.211025	0.0532406	0.135735	0.129843	0.189724	0.126119	0.0733008	765	0.34938	0.385971	0.459375	0.230739	0.368423	0.360337	0.435574	0.355132	0.270741	765	-0.0363408	0.064799	0.477366	0.0225515	0.0138983	0.0261888	0.139686	0.175492	-0.0945853	0.35225	0.00858368	0.204097	-0.13652	-0.196908	-0.10127	0.21996	0.0984827	0.0348064	0.151289	0.0381197	0.102697	0.102641	0.215868	0.00815537	-0.0398542	0.102697	0.102641	0.110179	0.0670731	0.215868
0.121374	0.145537	0.200163	0.0469912	0.125694	0.136483	0.192927	0.119289	0.0694988	766	0.348388	0.381494	0.447395	0.216774	0.354534	0.369436	0.439235	0.345382	0.263626	766	-0.0361313	0.0910699	0.485607	0.0151648	0.0135226	0.0378477	0.126091	0.17857	-0.096366	0.351754	0.00646786	0.203806	-0.137151	-0.200131	-0.104249	0.21667	0.0749037	0.0318145	0.158286	0.00771318	0.0922085	0.0848748	0.214432	0.00848712	-0.0625706	0.0922085	0.0848748	0.101829	0.0561283	0.214432
0.121566	0.147774	0.204487	0.0512788	0.133093	0.13228	0.187885	0.110413	0.0662322	767	0.348663	0.384414	0.452202	0.226448	0.364819	0.363704	0.433457	0.332284	0.257356	767	-0.0259483	0.0913953	0.490337	0.0100052	-0.000523392	0.0423473	0.112962	0.183403	-0.0974096	0.351728	0.00122473	0.204032	-0.131419	-0.206051	-0.100566	0.213464	0.0719117	0.037685	0.163102	0.0058344	0.0925933	0.0755136	0.231434	0.0212866	-0.0700137	0.0925933	0.0755136	0.107405	0.0570597	0.231434
0.126015	0.143577	0.208663	0.0495128	0.143041	0.130984	0.177825	0.122274	0.0713986	768	0.354986	0.378915	0.456796	0.222515	0.378208	0.361918	0.421693	0.349677	0.267205	768	-0.0292352	0.103551	0.484924	0.00781907	-0.00785935	0.0469675	0.121231	0.192736	-0.100563	0.353071	0.0023774	0.206646	-0.132618	-0.213954	-0.10451	0.206676	0.0664716	0.0261725	0.166881	0.0212823	0.107983	0.0729469	0.230362	0.0188603	-0.0629136	0.107983	0.0729469	0.10501	0.0728138	0.230362
0.132807	0.149391	0.2114	0.0549291	0.122256	0.130751	0.189091	0.121747	0.0691079	769	0.364427	0.386512	0.459783	0.23437	0.349651	0.361595	0.434845	0.348922	0.262884	769	-0.0276498	0.092213	0.487653	-0.0120124	-0.00766882	0.0661828	0.130654	0.197202	-0.0888354	0.351171	0.0227792	0.206304	-0.152581	-0.222142	-0.110346	0.208722	0.0440318	0.0185925	0.170914	0.00412231	0.0928316	0.0813055	0.231609	0.0168044	-0.0594549	0.0928316	0.0813055	0.145008	0.0685572	0.231609
0.132509	0.145718	0.217362	0.049981	0.12336	0.126352	0.186737	0.120902	0.0726393	770	0.364018	0.381731	0.466221	0.223564	0.351226	0.355461	0.432131	0.347709	0.269517	770	-0.0477229	0.0935265	0.460979	0.0341697	-0.00836117	0.0748236	0.129696	0.212655	-0.131351	0.350838	0.00373605	0.189819	-0.172368	-0.225962	-0.11965	0.176168	0.108906	0.0415828	0.207783	0.0116285	0.115992	0.108103	0.226103	0.0086621	-0.0674125	0.115992	0.108103	0.172735	0.0784309	0.226103
0.124965	0.147198	0.198312	0.0514064	0.126515	0.132278	0.183339	0.11808	0.0674033	771	0.353503	0.383664	0.445322	0.22673	0.355689	0.363701	0.428181	0.343628	0.259621	771	-0.0167535	0.0436021	0.493615	0.0734498	0.00839968	0.0797505	0.121887	0.178764	-0.125677	0.367019	0.00808195	0.1899	-0.167498	-0.227864	-0.124176	0.171741	0.134973	0.0536236	0.211245	0.00926652	0.0982658	0.123451	0.226769	0.0152171	-0.0733744	0.0982658	0.123451	0.175944	0.0776109	0.226769
0.118398	0.146088	0.202966	0.0493073	0.128286	0.129228	0.180456	0.123372	0.0705726	772	0.344091	0.382214	0.450518	0.222052	0.358171	0.359483	0.424801	0.351243	0.265655	772	-0.0198076	0.0500514	0.492763	0.0764237	0.0010125	0.0811114	0.120654	0.17883	-0.132224	0.356519	0.00938664	0.197151	-0.161253	-0.21265	-0.109708	0.178878	0.131014	0.0557966	0.20609	0.000598005	0.0872272	0.124886	0.218544	0.0141872	-0.078175	0.0872272	0.124886	0.174822	0.0770569	0.218544
0.121358	0.148554	0.195279	0.0534487	0.132913	0.135652	0.190112	0.121909	0.0732956	773	0.348365	0.385427	0.441903	0.23119	0.364572	0.36831	0.436018	0.349154	0.270732	773	-0.0100881	0.0548198	0.496434	0.0778872	0.0112011	0.0711436	0.131236	0.189924	-0.124602	0.363142	0.0125558	0.208025	-0.168926	-0.20069	-0.0935682	0.18252	0.132314	0.0601002	0.204993	0.0030394	0.0914218	0.126583	0.226028	0.00793393	-0.0704202	0.0914218	0.126583	0.172742	0.0799113	0.226028
0.133357	0.154383	0.212122	0.057439	0.124228	0.135705	0.191971	0.121336	0.0717643	774	0.365181	0.392917	0.460567	0.239664	0.35246	0.368381	0.438145	0.348333	0.267889	774	-0.0228615	0.0783457	0.510243	0.0767506	-0.0109496	0.083425	0.13246	0.204749	-0.135996	0.352929	0.0124741	0.218553	-0.17528	-0.201739	-0.10287	0.214969	0.138928	0.0520359	0.222122	0.00986724	0.121201	0.116429	0.189854	0.010121	-0.074346	0.121201	0.116429	0.168599	0.0771967	0.189854
0.123196	0.149765	0.214627	0.0503435	0.134731	0.136764	0.184432	0.119054	0.0719316	775	0.350993	0.386995	0.463278	0.224374	0.367058	0.369817	0.429455	0.345042	0.268201	775	-0.0533857	0.0464841	0.473375	0.104096	-0.0517372	0.0675276	0.130378	0.192717	-0.15581	0.332333	0.0208238	0.20695	-0.185786	-0.209968	-0.11743	0.185035	0.15613	0.0282708	0.214385	0.0113888	0.11526	0.155485	0.146414	-0.0120152	-0.0725588	0.11526	0.155485	0.17696	0.0914406	0.146414
0.120647	0.147012	0.204485	0.049017	0.130607	0.126002	0.179011	0.125773	0.0728295	776	0.347342	0.383421	0.452201	0.221398	0.361396	0.354967	0.423097	0.354645	0.269869	776	-0.0539468	0.0375751	0.470404	0.111623	-0.0618974	0.0789316	0.123944	0.197372	-0.164555	0.331897	0.0178698	0.204128	-0.182523	-0.209169	-0.119445	0.18546	0.131271	-0.00253282	0.214978	0.0187786	0.0974495	0.150768	0.146218	-0.0133972	-0.0708739	0.0974495	0.150768	0.198237	0.0813307	0.146218
0.119064	0.153796	0.209271	0.0497883	0.128334	0.134679	0.204565	0.11609	0.0735261	777	0.345056	0.392168	0.457461	0.223133	0.358237	0.366986	0.452289	0.34072	0.271157	777	-0.0476345	0.0353701	0.474718	0.115004	-0.0575116	0.0714532	0.127403	0.214831	-0.164812	0.333769	0.0196746	0.204924	-0.186879	-0.208077	-0.111116	0.184778	0.129853	-0.00164881	0.220161	0.015007	0.0913452	0.153737	0.146904	-0.0203851	-0.0660026	0.0913452	0.153737	0.201526	0.0784011	0.146904
0.120894	0.140862	0.198366	0.0489596	0.134352	0.133449	0.173246	0.129118	0.0721374	778	0.347698	0.375316	0.445383	0.221268	0.36654	0.365306	0.416229	0.359331	0.268584	778	-0.0369481	0.0374894	0.475694	0.114941	-0.0522055	0.0893632	0.132775	0.22944	-0.181017	0.337249	0.0219896	0.190368	-0.219017	-0.187687	-0.121621	0.184559	0.13116	-0.0146266	0.200432	0.0145664	0.0735098	0.153918	0.148198	-0.0190094	-0.061591	0.0735098	0.153918	0.211396	0.0783889	0.148198
0.124151	0.14577	0.20297	0.0485501	0.116787	0.131577	0.192485	0.117617	0.0698221	779	0.35235	0.381798	0.450522	0.220341	0.341741	0.362736	0.438731	0.342953	0.264239	779	-0.0638406	0.0447971	0.470132	0.102527	0.0010204	0.0889935	0.157318	0.218591	-0.194252	0.328702	0.0401309	0.184582	-0.252147	-0.174414	-0.107918	0.183741	0.136948	-3.74752e-05	0.192476	0.0308829	0.079066	0.157045	0.159271	-0.0268746	-0.0504157	0.079066	0.157045	0.23617	0.0557457	0.159271
0.118703	0.147606	0.19756	0.0482854	0.12761	0.130436	0.185237	0.122134	0.0744501	780	0.344533	0.384196	0.444477	0.219739	0.357225	0.361159	0.430392	0.349477	0.272855	780	-0.0596756	0.0369471	0.473815	0.116775	-0.0112376	0.100416	0.144937	0.215564	-0.195023	0.327385	0.0310935	0.185557	-0.242873	-0.177774	-0.107492	0.18274	0.143403	0.00579925	0.177109	0.0403613	0.0796697	0.146912	0.162078	-0.0187145	-0.0552879	0.0796697	0.146912	0.260258	0.0461725	0.162078
0.122563	0.147565	0.199999	0.0499343	0.127203	0.1193	0.189197	0.122929	0.0707668	781	0.350089	0.384142	0.447213	0.22346	0.356656	0.345398	0.434968	0.350612	0.26602	781	-0.0608488	0.0293569	0.471538	0.113456	-0.00953089	0.10013	0.148819	0.230175	-0.18448	0.325224	0.035471	0.189835	-0.245625	-0.179108	-0.11385	0.170038	0.153034	0.0235042	0.163413	0.0384516	0.0726131	0.141524	0.162116	-0.0178322	-0.0508932	0.0726131	0.141524	0.252921	0.0446848	0.162116
0.120143	0.150812	0.204329	0.0493456	0.134919	0.14297	0.18325	0.123756	0.0746385	782	0.346616	0.388346	0.452027	0.222139	0.367314	0.378114	0.428078	0.351789	0.2732	782	-0.0593883	0.0296552	0.466943	0.11381	-0.00644725	0.0993348	0.148077	0.228957	-0.192103	0.299494	0.0275611	0.184274	-0.248281	-0.176986	-0.121103	0.176834	0.154501	0.0185872	0.167114	0.0409106	0.0783586	0.146612	0.169075	-0.0126666	-0.0505624	0.0783586	0.146612	0.256079	0.0471431	0.169075
0.12664	0.149391	0.202514	0.0515345	0.131237	0.129411	0.194184	0.120877	0.0688991	783	0.355865	0.386511	0.450016	0.227012	0.362266	0.359738	0.440663	0.347673	0.262486	783	-0.0612586	0.0623111	0.482426	0.131586	0.0155089	0.0778327	0.165228	0.221866	-0.195145	0.294043	0.0197221	0.175536	-0.243304	-0.183497	-0.131001	0.198252	0.16248	0.0184709	0.151516	0.0520941	0.0638005	0.160413	0.1931	-0.0272122	-0.0345981	0.0638005	0.160413	0.255041	0.0443556	0.1931
0.121512	0.150009	0.194524	0.0506979	0.133878	0.12632	0.189488	0.11291	0.0682522	784	0.348586	0.38731	0.441049	0.225162	0.365893	0.355416	0.435302	0.336021	0.261251	784	-0.0495162	0.0587866	0.491433	0.116917	0.0398328	0.0700431	0.181861	0.233081	-0.196779	0.31021	0.00988363	0.194222	-0.243395	-0.160613	-0.11873	0.185169	0.163916	0.012431	0.151459	0.0468516	0.0611291	0.132229	0.238074	-0.0272914	0.0112311	0.0611291	0.132229	0.249211	0.0292318	0.238074
0.128766	0.150174	0.206974	0.0493522	0.132953	0.120242	0.199935	0.117909	0.0733235	785	0.358839	0.387523	0.454944	0.222154	0.364627	0.346759	0.447141	0.343379	0.270783	785	-0.0447859	0.0523537	0.487947	0.111097	0.0499103	0.0571949	0.208941	0.228811	-0.194898	0.309503	0.00502742	0.197949	-0.24693	-0.145322	-0.118082	0.189759	0.179433	0.00356355	0.160799	0.0184598	0.0583355	0.129626	0.239567	-0.0290144	0.0168865	0.0583355	0.129626	0.248869	0.034027	0.239567
0.132079	0.151629	0.206845	0.05878	0.135824	0.131711	0.185245	0.126247	0.0754851	786	0.363426	0.389395	0.454802	0.242446	0.368542	0.36292	0.430401	0.355313	0.274746	786	-0.0427508	0.00958362	0.503095	0.118634	0.0725986	0.044497	0.231632	0.232035	-0.202135	0.312977	0.00608714	0.208225	-0.255439	-0.138846	-0.118497	0.172701	0.152496	0.0220717	0.134918	0.00313405	0.0261563	0.140727	0.235444	-0.0175936	0.0252008	0.0261563	0.140727	0.244718	0.0483826	0.235444
0.125023	0.146281	0.199971	0.0500569	0.128644	0.129228	0.194653	0.109028	0.0611533	787	0.353586	0.382467	0.447181	0.223734	0.35867	0.359483	0.441195	0.330194	0.247292	787	-0.0571809	-0.00531204	0.469242	0.0922189	0.0541978	0.0520901	0.209509	0.197768	-0.209347	0.309913	-0.00259792	0.195558	-0.243876	-0.150617	-0.130134	0.159155	0.144228	0.0221914	0.128434	-0.00437446	0.00874828	0.0998199	0.218023	-0.00882307	-0.0222405	0.00874828	0.0998199	0.249303	0.0299514	0.218023
0.12615	0.142361	0.197133	0.0462478	0.129514	0.121386	0.197785	0.117403	0.074341	788	0.355176	0.377308	0.443997	0.215053	0.35988	0.348405	0.444731	0.342642	0.272655	788	-0.0443672	0.00489423	0.476542	0.0762895	0.0682813	0.0127867	0.2215	0.220433	-0.205376	0.315527	-0.011506	0.203978	-0.252658	-0.166807	-0.147443	0.164137	0.13661	0.0299466	0.117397	-0.0175318	-0.00447359	0.0873719	0.227567	-0.0318937	-0.0280371	-0.00447359	0.0873719	0.26901	0.0386172	0.227567
0.131342	0.157812	0.199474	0.052905	0.122058	0.136097	0.175968	0.118784	0.0662697	789	0.362412	0.397255	0.446625	0.230011	0.349368	0.368913	0.419485	0.344651	0.257429	789	-0.0346426	0.0131043	0.500504	0.0750138	0.085774	-0.00254635	0.227138	0.203458	-0.219982	0.305351	-0.0108365	0.183214	-0.246397	-0.177756	-0.139945	0.150304	0.139659	0.0265926	0.148869	-0.0123746	0.0298221	0.0907371	0.202899	-0.0112599	-0.0390868	0.0298221	0.0907371	0.268246	0.041181	0.202899
0.115678	0.15601	0.19925	0.0495317	0.131473	0.126991	0.184684	0.120083	0.0712009	790	0.340114	0.394981	0.446374	0.222557	0.362592	0.356358	0.429749	0.34653	0.266835	790	-0.0729646	0.0312371	0.48111	0.0894791	0.0713873	0.0179559	0.221412	0.235326	-0.215265	0.289688	0.0136879	0.154213	-0.226091	-0.175939	-0.124776	0.156349	0.127914	0.0437851	0.139488	-0.018162	0.0287104	0.110991	0.179965	0.00834325	-0.0351722	0.0287104	0.110991	0.258393	0.0465734	0.179965
0.121184	0.156702	0.209239	0.0515059	0.130501	0.133622	0.199664	0.124462	0.0725242	791	0.348115	0.395856	0.457427	0.226949	0.361249	0.365543	0.446838	0.352792	0.269303	791	-0.0438952	0.0464234	0.487756	0.120612	0.0653804	0.00623328	0.238623	0.256705	-0.196612	0.299645	0.0184175	0.159556	-0.229279	-0.167228	-0.129753	0.165153	0.152848	0.0400112	0.128084	0.000897109	0.0453754	0.123884	0.178006	0.00307025	-0.0244869	0.0453754	0.123884	0.24486	0.0673715	0.178006
0.124367	0.148584	0.203501	0.0488426	0.129678	0.129365	0.189085	0.128228	0.071495	792	0.352658	0.385465	0.451111	0.221004	0.360108	0.359674	0.434839	0.358089	0.267386	792	-0.0361017	0.0394259	0.490148	0.126953	0.0563717	0.00762855	0.239117	0.253148	-0.231438	0.294964	0.0313811	0.115897	-0.264448	-0.186984	-0.162845	0.152827	0.128686	0.0490563	0.108871	-0.00758049	0.0442751	0.125554	0.162288	-0.00996465	-0.0321826	0.0442751	0.125554	0.241613	0.0615879	0.162288
0.120023	0.143813	0.216914	0.0497619	0.133781	0.123915	0.19452	0.120828	0.0736296	793	0.346443	0.379227	0.46574	0.223074	0.36576	0.352016	0.441045	0.347603	0.271348	793	-0.0268125	0.0354908	0.492227	0.13581	0.0565039	0.00093305	0.239866	0.252717	-0.235653	0.290038	0.0593318	0.117871	-0.270813	-0.156753	-0.151343	0.15423	0.117111	0.0475825	0.110664	-0.0191732	0.0396556	0.121071	0.163019	-0.00699121	-0.0275525	0.0396556	0.121071	0.224619	0.0948351	0.163019
0.119574	0.15435	0.198152	0.0493215	0.125632	0.127318	0.194683	0.116142	0.0688169	794	0.345795	0.392875	0.445143	0.222084	0.354446	0.356817	0.441229	0.340796	0.26233	794	-0.0343682	0.0385328	0.486803	0.134996	0.0512314	0.00346223	0.22398	0.250411	-0.211536	0.298712	0.0798938	0.119882	-0.259487	-0.113036	-0.114464	0.164134	0.103936	0.0768553	0.088426	-0.00656779	0.0177693	0.128854	0.168212	-0.00521583	-0.00651749	0.0177693	0.128854	0.214987	0.110938	0.168212
0.121206	0.151434	0.190231	0.0492409	0.129006	0.134321	0.179258	0.117813	0.0686579	795	0.348147	0.389145	0.436155	0.221903	0.359174	0.366499	0.423388	0.343238	0.262027	795	-0.0284945	0.0371456	0.486551	0.127058	0.0427775	0.0080646	0.214336	0.242959	-0.205064	0.304403	0.0842589	0.119962	-0.27969	-0.107955	-0.117022	0.163249	0.0992088	0.0731626	0.0975522	-0.0123245	0.0161327	0.125622	0.164349	-0.00229211	-0.00993171	0.0161327	0.125622	0.222611	0.116481	0.164349
0.118441	0.158975	0.203031	0.0499215	0.125212	0.134771	0.168976	0.114573	0.0636955	796	0.344152	0.398717	0.45059	0.223431	0.353854	0.367111	0.411067	0.338487	0.25238	796	-0.0462652	0.0137445	0.504482	0.127783	0.052322	0.0324737	0.247251	0.262999	-0.185197	0.288559	0.0816205	0.106912	-0.281165	-0.119386	-0.125892	0.141714	0.101606	0.0970352	0.0689042	-0.0370733	0.00208325	0.127242	0.174652	0.0132188	0.0201599	0.00208325	0.127242	0.225715	0.118221	0.174652
0.11907	0.148629	0.199514	0.0465629	0.124871	0.119784	0.193205	0.120024	0.0654688	797	0.345065	0.385525	0.44667	0.215784	0.353371	0.346099	0.439551	0.346444	0.255869	797	-0.0356732	0.00666348	0.503454	0.114726	0.0585574	0.0231193	0.245208	0.256608	-0.189266	0.294372	0.0966745	0.0775457	-0.240702	-0.10213	-0.0902373	0.141786	0.112452	0.100448	0.0668412	-0.0398906	0.00343769	0.127753	0.176265	0.0142521	0.0203483	0.00343769	0.127753	0.209439	0.108197	0.176265
0.116265	0.141056	0.207917	0.0493275	0.131633	0.135535	0.19099	0.117771	0.0693466	798	0.340976	0.375574	0.455979	0.222098	0.362812	0.368151	0.437024	0.343178	0.263337	798	-0.0394549	0.00981663	0.503133	0.113971	0.052373	0.0293129	0.247236	0.254185	-0.223172	0.286857	0.0113053	0.0652575	-0.248598	-0.130281	-0.11792	0.140514	0.174094	0.106763	0.0799518	-0.00848182	0.0289765	0.123678	0.153672	0.0316304	0.0272117	0.0289765	0.123678	0.219413	0.154563	0.153672
0.124386	0.146903	0.202958	0.0514231	0.140273	0.131571	0.180923	0.124208	0.0650935	799	0.352684	0.383279	0.450509	0.226767	0.374531	0.362728	0.42535	0.352431	0.255134	799	-0.0526624	0.0184478	0.50354	0.120164	0.0726136	0.0382649	0.245347	0.257352	-0.215487	0.286285	0.0191926	0.0878306	-0.240521	-0.134979	-0.116788	0.142896	0.168808	0.0929889	0.0739141	-0.00608916	0.0277478	0.125231	0.157421	0.0330185	0.0266149	0.0277478	0.125231	0.204902	0.157984	0.157421
0.11966	0.150244	0.200314	0.0510286	0.131406	0.131471	0.202532	0.119972	0.072946	800	0.345918	0.387613	0.447565	0.225895	0.3625	0.36259	0.450035	0.346369	0.270085	800	-0.0476496	0.0320194	0.506588	0.123214	0.079623	0.0570243	0.243527	0.27886	-0.203387	0.29161	0.0315721	0.0954967	-0.229601	-0.131912	-0.108398	0.165552	0.198917	0.116507	0.102747	0.000906179	0.0601136	0.140112	0.172804	0.0644237	0.0267986	0.0601136	0.140112	0.25416	0.146456	0.172804
0.125215	0.153299	0.202749	0.0524732	0.114212	0.132209	0.181871	0.113928	0.0683128	801	0.353857	0.391534	0.450277	0.22907	0.337952	0.363605	0.426463	0.337532	0.261367	801	-0.043117	0.0321719	0.506485	0.12589	0.0833324	0.0677796	0.244191	0.286915	-0.188433	0.304665	0.0294159	0.0993366	-0.240258	-0.131265	-0.111263	0.175353	0.201554	0.122908	0.116121	0.00141509	0.0667866	0.137111	0.175437	0.0587829	0.0258473	0.0667866	0.137111	0.245939	0.145732	0.175437
0.119422	0.150864	0.210227	0.0502439	0.130649	0.130534	0.182953	0.120649	0.0679432	802	0.345575	0.388412	0.458505	0.224151	0.361454	0.361295	0.42773	0.347346	0.260659	802	-0.0548066	0.0337211	0.49796	0.152349	0.0760373	0.0576833	0.250568	0.287885	-0.191153	0.297489	0.0574902	0.0896998	-0.222859	-0.119013	-0.109311	0.174427	0.210421	0.122881	0.108872	0.000690745	0.0665713	0.17114	0.166067	0.0721569	0.0400765	0.0665713	0.17114	0.230757	0.122293	0.166067
0.116241	0.149913	0.214415	0.0502369	0.136691	0.133283	0.185922	0.119791	0.0690078	803	0.340941	0.387186	0.463049	0.224136	0.369718	0.365079	0.431186	0.346108	0.262693	803	-0.0430345	0.0332899	0.478564	0.138148	0.0956047	0.0439503	0.274096	0.305957	-0.201391	0.290501	0.0487186	0.0926683	-0.224049	-0.107078	-0.0956046	0.175234	0.207625	0.112431	0.116868	-0.00834738	0.0646864	0.176771	0.15321	0.0788575	0.0222226	0.0646864	0.176771	0.238905	0.100255	0.15321
0.128013	0.150537	0.20379	0.0515462	0.130565	0.134732	0.184084	0.121003	0.0688011	804	0.357789	0.387992	0.451431	0.227038	0.361338	0.367058	0.42905	0.347855	0.2623	804	-0.0378285	0.0500913	0.48152	0.151149	0.112071	0.0422563	0.277264	0.306405	-0.214238	0.289221	0.0380755	0.0893303	-0.225124	-0.107262	-0.0968946	0.176097	0.190066	0.0866648	0.121687	-0.0120115	0.0667765	0.178057	0.149736	0.0800425	0.0214977	0.0667765	0.178057	0.246623	0.0958917	0.149736
0.118897	0.144417	0.210451	0.0519543	0.130475	0.129775	0.197262	0.121669	0.0672472	805	0.344815	0.380023	0.458749	0.227935	0.361213	0.360243	0.444142	0.348811	0.259321	805	-0.0375013	0.0461577	0.489567	0.145168	0.0739435	0.0390106	0.256912	0.282829	-0.215939	0.290318	0.0355949	0.0753409	-0.225681	-0.113527	-0.102648	0.172465	0.189063	0.0835811	0.1225	-0.012681	0.0665941	0.174315	0.122505	0.0747304	0.00573309	0.0665941	0.174315	0.247936	0.0930401	0.122505
0.11793	0.147506	0.203502	0.0530633	0.134877	0.130514	0.201831	0.119476	0.0709928	806	0.34341	0.384066	0.451112	0.230355	0.367256	0.361268	0.449256	0.345654	0.266445	806	-0.0296532	0.0577867	0.50114	0.155061	0.094116	0.0521045	0.256937	0.286082	-0.201605	0.30611	0.0488189	0.100734	-0.211331	-0.112337	-0.0965561	0.169254	0.189615	0.091624	0.107452	-0.0202368	0.079256	0.179645	0.140866	0.066744	-0.000893644	0.079256	0.179645	0.24733	0.088574	0.140866
0.124107	0.144508	0.214087	0.0499177	0.128097	0.126034	0.182109	0.125674	0.0682414	807	0.352288	0.380142	0.462696	0.223423	0.357906	0.355012	0.426743	0.354506	0.261231	807	-0.0365617	0.0461966	0.516212	0.15535	0.0830022	0.068658	0.256477	0.294613	-0.172883	0.303702	0.0641388	0.123578	-0.215737	-0.109754	-0.103097	0.160008	0.20917	0.128772	0.104754	-0.0170966	0.0648498	0.159521	0.125277	0.0344175	-0.0022101	0.0648498	0.159521	0.222879	0.0896279	0.125277
0.126976	0.152834	0.197127	0.0556131	0.131288	0.133498	0.180558	0.126285	0.0716394	808	0.356337	0.39094	0.44399	0.235824	0.362337	0.365374	0.424921	0.355366	0.267655	808	-0.0330481	0.0356176	0.512627	0.152806	0.084833	0.0726456	0.252389	0.297204	-0.166497	0.303235	0.0641284	0.121562	-0.219349	-0.103506	-0.104047	0.160952	0.210805	0.138282	0.117309	-0.0414529	0.0696746	0.162175	0.126679	0.0345511	-0.00621428	0.0696746	0.162175	0.223269	0.08676	0.126679
0.122901	0.138245	0.204395	0.0474406	0.126806	0.127663	0.182401	0.1156	0.0674059	809	0.350572	0.371813	0.452101	0.217809	0.356098	0.3573	0.427085	0.34	0.259627	809	-0.0369243	0.0399267	0.50096	0.145837	0.0739669	0.0857434	0.234977	0.282289	-0.17494	0.280033	0.0569699	0.126031	-0.198089	-0.132672	-0.132664	0.185522	0.215546	0.137871	0.105628	-0.0233404	0.0870751	0.149695	0.0944411	0.0559066	-0.0411603	0.0870751	0.149695	0.230336	0.077206	0.0944411
0.117353	0.157473	0.197516	0.0495636	0.126681	0.130491	0.185066	0.11326	0.0672667	810	0.342569	0.396829	0.444428	0.222629	0.355923	0.361236	0.430192	0.336541	0.259358	810	-0.0228479	0.0384371	0.506263	0.148327	0.078694	0.0838375	0.239795	0.282767	-0.166611	0.293074	0.0716064	0.169243	-0.2302	-0.12841	-0.151299	0.18805	0.215515	0.134815	0.107351	-0.0207342	0.0891665	0.158431	0.122394	0.0327434	-0.0386285	0.0891665	0.158431	0.218939	0.0807791	0.122394
0.126898	0.145134	0.198993	0.0506411	0.13378	0.125138	0.189788	0.112024	0.0661467	811	0.356228	0.380964	0.446087	0.225036	0.365759	0.353748	0.435646	0.3347	0.25719	811	-0.0135044	0.0311067	0.505853	0.149219	0.085395	0.0840045	0.233704	0.280731	-0.138347	0.300858	0.0575891	0.146526	-0.234389	-0.112243	-0.157545	0.190873	0.202547	0.131668	0.102771	-0.0312959	0.0748698	0.153535	0.119933	0.0313179	-0.0404649	0.0748698	0.153535	0.22107	0.0816448	0.119933
0.123489	0.145664	0.200263	0.0481053	0.121319	0.124632	0.18789	0.120588	0.0693516	812	0.35141	0.38166	0.447508	0.219329	0.348309	0.353033	0.433463	0.347258	0.263347	812	0.0176022	0.0736237	0.530647	0.13239	0.106249	0.0619659	0.268226	0.282641	-0.118483	0.318762	0.0613245	0.151057	-0.237142	-0.10801	-0.163445	0.222763	0.205133	0.138645	0.0947826	-0.0227495	0.0665781	0.144707	0.134555	0.015386	-0.0139304	0.0665781	0.144707	0.215699	0.0993985	0.134555
0.126372	0.146544	0.189657	0.0504773	0.130009	0.129789	0.189961	0.118181	0.069388	813	0.355489	0.382811	0.435496	0.224672	0.360567	0.360262	0.435845	0.343775	0.263416	813	0.0203092	0.0678114	0.51468	0.153937	0.113177	0.0319315	0.269872	0.276234	-0.119534	0.314791	0.0594344	0.149797	-0.233593	-0.10681	-0.163366	0.225603	0.195829	0.135822	0.103609	-0.0240552	0.0681895	0.122781	0.126671	0.0391283	-0.0162694	0.0681895	0.122781	0.188429	0.107602	0.126671
0.12152	0.152891	0.197048	0.0507382	0.121543	0.135219	0.181595	0.118095	0.070249	814	0.348598	0.391013	0.443901	0.225251	0.34863	0.367722	0.426139	0.343649	0.265045	814	0.0205892	0.139381	0.523729	0.170803	0.132688	0.00295209	0.244052	0.262198	-0.119978	0.312886	0.0591648	0.148755	-0.231717	-0.106076	-0.162958	0.258044	0.231443	0.176702	0.0844098	-0.057169	0.0588526	0.134011	0.138893	0.0238967	-0.0283203	0.0588526	0.134011	0.170796	0.0936635	0.138893
0.115908	0.145514	0.209267	0.0464759	0.125444	0.128316	0.176675	0.120873	0.0660642	815	0.340452	0.381463	0.457458	0.215583	0.354181	0.358212	0.420327	0.347668	0.25703	815	0.015526	0.14726	0.524128	0.17502	0.140695	0.0114904	0.238635	0.260348	-0.118876	0.308031	0.0700502	0.124879	-0.231597	-0.100306	-0.167716	0.263559	0.227067	0.204846	0.0920269	-0.0659042	0.0605169	0.141311	0.135147	0.0295285	-0.028925	0.0605169	0.141311	0.167493	0.0894258	0.135147
0.123365	0.151524	0.204613	0.0527375	0.139582	0.123643	0.188109	0.115689	0.0709103	816	0.351234	0.389261	0.452342	0.229646	0.373606	0.351629	0.433715	0.340131	0.26629	816	0.0182764	0.143515	0.519351	0.177139	0.127941	-0.0541811	0.243252	0.261205	-0.118122	0.308081	0.0701412	0.123162	-0.237346	-0.0985906	-0.168995	0.276636	0.229431	0.20763	0.121648	-0.0712342	0.0668903	0.139229	0.134115	-0.00605055	-0.0231452	0.0668903	0.139229	0.144251	0.0919966	0.134115
0.130142	0.137197	0.204853	0.0508764	0.124721	0.126709	0.187896	0.128486	0.0708419	817	0.360751	0.370401	0.452607	0.225558	0.353158	0.355962	0.433469	0.358449	0.266161	817	0.0190334	0.122767	0.518216	0.148848	0.131398	-0.0495012	0.258784	0.262681	-0.123705	0.302184	0.0510956	0.131467	-0.239828	-0.090469	-0.173875	0.267811	0.234818	0.211265	0.116612	-0.0771244	0.0594864	0.10827	0.148146	-0.00908082	-0.00934499	0.0594864	0.10827	0.135553	0.0991097	0.148146
0.126309	0.146057	0.203706	0.0531602	0.133933	0.136727	0.175854	0.123685	0.0704034	818	0.3554	0.382174	0.451338	0.230565	0.365969	0.369766	0.419349	0.351688	0.265336	818	0.0538961	0.116846	0.515542	0.155275	0.141576	-0.0547069	0.23582	0.249906	-0.11789	0.317164	0.0382341	0.132188	-0.237301	-0.0576648	-0.166783	0.266104	0.236984	0.210924	0.115299	-0.0866724	0.0568323	0.113217	0.146428	-0.0112966	-0.0203512	0.0568323	0.113217	0.134741	0.107532	0.146428
0.120459	0.153795	0.206604	0.0542072	0.1296	0.126501	0.187249	0.117154	0.0705307	819	0.347072	0.392167	0.454537	0.232824	0.36	0.35567	0.432722	0.342278	0.265576	819	0.069296	0.12714	0.515138	0.153439	0.144569	-0.0627597	0.23494	0.242019	-0.106024	0.331275	0.048551	0.15412	-0.25575	-0.0489519	-0.166206	0.272999	0.241524	0.2235	0.1004	-0.0820919	0.0539586	0.10407	0.135118	-0.00672361	-0.0275626	0.0539586	0.10407	0.13935	0.102259	0.135118
0.125118	0.140023	0.190669	0.050759	0.120614	0.123241	0.192564	0.128634	0.0749315	820	0.35372	0.374197	0.436657	0.225298	0.347295	0.351057	0.438821	0.358656	0.273736	820	0.0647012	0.12685	0.527545	0.154461	0.146684	-0.0596669	0.23692	0.24687	-0.112928	0.30903	0.0416176	0.151039	-0.264548	-0.0502673	-0.18953	0.263987	0.239036	0.224585	0.0981164	-0.0803187	0.046577	0.0986388	0.144994	-0.00806826	-0.0174864	0.046577	0.0986388	0.139571	0.104968	0.144994
0.114823	0.151669	0.198957	0.052386	0.121078	0.123878	0.186115	0.113997	0.0675056	821	0.338856	0.389446	0.446046	0.22888	0.347962	0.351963	0.43141	0.337634	0.259818	821	0.0772592	0.14232	0.522613	0.164303	0.155303	-0.069532	0.224786	0.233685	-0.138389	0.317373	0.0213262	0.137806	-0.255777	-0.0260549	-0.167627	0.278792	0.224423	0.213383	0.118258	-0.0491646	0.0853907	0.11588	0.155721	-0.00714108	-0.0254012	0.0853907	0.11588	0.163457	0.138649	0.155721
0.119099	0.148359	0.211996	0.0510666	0.129712	0.130814	0.18711	0.109532	0.0655337	822	0.345107	0.385174	0.46043	0.225979	0.360155	0.361682	0.432563	0.330956	0.255996	822	0.0993425	0.132403	0.537248	0.161735	0.1471	-0.0739097	0.21289	0.223511	-0.141221	0.301272	0.0459359	0.145851	-0.260906	-0.0192672	-0.170456	0.288545	0.21357	0.209908	0.120842	-0.0531608	0.0864224	0.127703	0.168294	-0.00548363	-0.0113272	0.0864224	0.127703	0.15865	0.12493	0.168294
0.114379	0.153291	0.193859	0.0484	0.125513	0.129927	0.17391	0.122776	0.0685122	823	0.338199	0.391524	0.440294	0.22	0.354278	0.360454	0.417025	0.350394	0.261748	823	0.103034	0.120187	0.545969	0.148751	0.137041	-0.0891123	0.188256	0.207086	-0.149507	0.302306	0.0405521	0.140061	-0.263349	-0.0209819	-0.171824	0.261318	0.224084	0.214632	0.141673	0.0042566	0.120815	0.111197	0.151085	-0.0235175	-0.014508	0.120815	0.111197	0.174589	0.155224	0.151085
0.117692	0.160238	0.205816	0.0498347	0.132773	0.122286	0.189691	0.119866	0.0660038	824	0.343062	0.400298	0.45367	0.223237	0.364381	0.349694	0.435536	0.346217	0.256912	824	0.130062	0.0783323	0.551711	0.152073	0.127794	-0.129723	0.182369	0.192783	-0.153508	0.316935	0.0502013	0.122816	-0.258553	-0.039955	-0.179054	0.230924	0.205967	0.238519	0.146077	0.0334117	0.13486	0.115393	0.140013	-0.0462243	-0.0225706	0.13486	0.115393	0.161467	0.151074	0.140013
0.117184	0.151452	0.205737	0.0483987	0.124573	0.131801	0.175834	0.124963	0.0701218	825	0.342322	0.389168	0.453583	0.219997	0.352949	0.363044	0.419326	0.3535	0.264805	825	0.149756	0.0916373	0.559776	0.172671	0.128599	-0.10909	0.182304	0.19252	-0.171056	0.321318	0.028763	0.157903	-0.275661	-0.0457728	-0.160421	0.239758	0.212379	0.253791	0.154853	0.0316773	0.14606	0.131571	0.151516	-0.0274293	-0.023384	0.14606	0.131571	0.175258	0.14745	0.151516
0.111905	0.138849	0.202092	0.0431581	0.123755	0.127515	0.188056	0.119378	0.0658792	826	0.334522	0.372624	0.449546	0.207745	0.351789	0.357093	0.433655	0.345511	0.256669	826	0.155737	0.0964859	0.557577	0.168844	0.135121	-0.117925	0.188398	0.196652	-0.178787	0.319642	0.0386204	0.15824	-0.275881	-0.0408074	-0.169308	0.244589	0.213358	0.2441	0.168344	0.0179743	0.145016	0.123837	0.147501	-0.0212412	-0.0309135	0.145016	0.123837	0.153177	0.166278	0.147501
0.126022	0.137944	0.210743	0.0494431	0.134288	0.122259	0.193654	0.12694	0.0736299	827	0.354996	0.371408	0.459067	0.222358	0.366453	0.349655	0.440062	0.356287	0.271348	827	0.143561	0.104022	0.540683	0.158758	0.139803	-0.112794	0.201241	0.185962	-0.154455	0.306951	0.0243519	0.164961	-0.26162	0.00502077	-0.166062	0.263844	0.212821	0.246092	0.168858	0.0305347	0.150919	0.107462	0.157799	-0.0107323	-0.00941438	0.150919	0.107462	0.155528	0.16273	0.157799
0.120028	0.153251	0.199352	0.048594	0.126056	0.121629	0.180314	0.119319	0.0678261	828	0.34645	0.391473	0.446489	0.220441	0.355043	0.348754	0.424634	0.345426	0.260434	828	0.166519	0.0871188	0.543818	0.145763	0.152241	-0.108378	0.190931	0.181277	-0.138384	0.312	0.0462031	0.146692	-0.229746	0.0368867	-0.12863	0.263928	0.200115	0.266644	0.137645	0.00529226	0.116558	0.10792	0.158318	-0.00492681	-0.00799468	0.116558	0.10792	0.134017	0.142684	0.158318
0.118194	0.150572	0.207955	0.0507477	0.135047	0.126998	0.188776	0.113995	0.0706618	829	0.343794	0.388036	0.456021	0.225273	0.367487	0.356367	0.434483	0.337631	0.265823	829	0.183512	0.100656	0.553029	0.161772	0.182158	-0.124341	0.196638	0.190001	-0.117412	0.334997	0.0686416	0.197954	-0.236367	0.0427823	-0.112513	0.278549	0.214453	0.288367	0.117942	0.0127393	0.125439	0.1312	0.199909	-0.0306327	0.00292861	0.125439	0.1312	0.110275	0.150004	0.199909
0.126886	0.140632	0.207917	0.0511446	0.127254	0.124896	0.186389	0.120376	0.0709546	830	0.356211	0.375009	0.45598	0.226152	0.356726	0.353406	0.431728	0.346953	0.266373	830	0.192417	0.122744	0.562858	0.161909	0.178726	-0.12557	0.190903	0.192515	-0.109169	0.337271	0.0533844	0.196965	-0.242108	0.0491268	-0.118575	0.296875	0.180537	0.278726	0.103428	0.019258	0.114632	0.109575	0.194502	-0.0388888	0.00664516	0.114632	0.109575	0.108134	0.167291	0.194502
0.12196	0.147218	0.19602	0.050433	0.126458	0.134367	0.178677	0.118121	0.0678526	831	0.349228	0.38369	0.442741	0.224573	0.355609	0.366561	0.422702	0.343687	0.260485	831	0.214758	0.107724	0.560566	0.165679	0.195637	-0.118592	0.183479	0.186761	-0.107125	0.351148	0.0602113	0.209187	-0.226043	0.0468299	-0.105043	0.288237	0.175941	0.265151	0.0931982	0.0202284	0.1048	0.111452	0.202849	-0.0350638	0.00181985	0.1048	0.111452	0.11363	0.163555	0.202849
0.12791	0.155864	0.191422	0.0493892	0.132826	0.12538	0.186891	0.122572	0.0730571	832	0.357645	0.394797	0.437518	0.222237	0.364453	0.35409	0.432308	0.350103	0.270291	832	0.225197	0.112422	0.566103	0.164097	0.208822	-0.118741	0.182681	0.198896	-0.101272	0.367671	0.0582199	0.231162	-0.227513	0.0461671	-0.0825705	0.29343	0.175195	0.28212	0.085462	0.0193621	0.106767	0.107985	0.227547	-0.0349682	0.00185549	0.106767	0.107985	0.113353	0.16347	0.227547
0.121454	0.151168	0.201494	0.048797	0.126378	0.135382	0.188385	0.12725	0.0722916	833	0.348503	0.388804	0.448881	0.2209	0.355497	0.367943	0.434034	0.356721	0.268871	833	0.216132	0.132684	0.575671	0.155412	0.212061	-0.117489	0.178992	0.189691	-0.0804379	0.383189	0.0473477	0.234063	-0.22508	0.0423108	-0.0947075	0.292188	0.192969	0.280081	0.0880127	0.0302352	0.129527	0.114266	0.221421	-0.0288485	0.0106587	0.129527	0.114266	0.11442	0.159271	0.221421
0.116433	0.140543	0.204285	0.04586	0.135593	0.131484	0.189225	0.118064	0.0654463	834	0.341223	0.37489	0.451979	0.21415	0.368229	0.362607	0.435	0.343605	0.255825	834	0.216283	0.128001	0.56562	0.159598	0.213579	-0.115142	0.182019	0.187837	-0.0818885	0.382334	0.0499036	0.223538	-0.228232	0.0287146	-0.107909	0.297667	0.185795	0.282087	0.084287	0.0260003	0.131731	0.103825	0.225461	-0.0329748	0.00819268	0.131731	0.103825	0.118418	0.168303	0.225461
0.117914	0.141622	0.202333	0.0471226	0.123389	0.125027	0.19075	0.126791	0.0735632	835	0.343386	0.376327	0.449814	0.217077	0.351268	0.353591	0.43675	0.356078	0.271225	835	0.21038	0.133898	0.561444	0.172574	0.22138	-0.108691	0.179326	0.181892	-0.06003	0.376698	0.0608452	0.230717	-0.213684	0.0203566	-0.115374	0.317731	0.161473	0.264459	0.0971996	0.0115471	0.14549	0.122812	0.23798	-0.0166336	-0.000401311	0.14549	0.122812	0.101905	0.178256	0.23798
0.116892	0.147575	0.201118	0.0475033	0.128347	0.132858	0.188142	0.124404	0.0692674	836	0.341895	0.384154	0.448461	0.217953	0.358255	0.364496	0.433753	0.35271	0.263187	836	0.21034	0.127587	0.558392	0.159707	0.214348	-0.0984641	0.203423	0.207953	-0.0623276	0.370824	0.0498313	0.224942	-0.204074	0.0453095	-0.0890188	0.319145	0.167734	0.267352	0.0917934	-0.00152433	0.130558	0.115284	0.234083	-0.00839319	0.0190682	0.130558	0.115284	0.101036	0.17534	0.234083
0.118959	0.151415	0.210407	0.04919	0.119312	0.125305	0.178049	0.121643	0.0687085	837	0.344905	0.389121	0.458701	0.221788	0.345416	0.353985	0.421958	0.348773	0.262123	837	0.204588	0.11919	0.514145	0.145915	0.2209	-0.116789	0.213748	0.210304	-0.0611913	0.3732	0.0512772	0.224757	-0.199388	0.0430706	-0.0899705	0.321858	0.170298	0.270285	0.0962789	-0.0015898	0.130017	0.128816	0.246866	0.0161615	0.0276709	0.130017	0.128816	0.109592	0.171646	0.246866
0.118508	0.141708	0.196781	0.0475494	0.13119	0.124684	0.183793	0.12698	0.0740513	838	0.34425	0.376441	0.4436	0.218058	0.362202	0.353106	0.428711	0.356343	0.272124	838	0.207803	0.126011	0.515501	0.143043	0.219437	-0.124887	0.212177	0.207004	-0.0740865	0.371336	0.0652391	0.229385	-0.189387	0.038284	-0.0899518	0.327091	0.192898	0.277325	0.107302	-0.0127753	0.12739	0.129951	0.244611	0.00408994	0.0190187	0.12739	0.129951	0.0938371	0.181899	0.244611
0.133899	0.149965	0.191344	0.0502145	0.136408	0.122567	0.174651	0.113489	0.0677588	839	0.365923	0.387254	0.437429	0.224086	0.369335	0.350096	0.417913	0.336881	0.260305	839	0.204575	0.120362	0.512514	0.144978	0.214641	-0.123277	0.219294	0.215794	-0.0795741	0.366523	0.0738531	0.225395	-0.192213	0.0565385	-0.0721003	0.325892	0.205396	0.28112	0.0960015	0.0105978	0.152917	0.140145	0.243879	-0.00144277	0.0386187	0.152917	0.140145	0.0886926	0.177575	0.243879
0.12441	0.152849	0.20728	0.0517228	0.129076	0.128619	0.182933	0.119092	0.0707557	840	0.352717	0.390959	0.455281	0.227426	0.359271	0.358635	0.427707	0.345096	0.265999	840	0.188604	0.15952	0.52489	0.115133	0.234269	-0.081253	0.251942	0.238062	-0.0699829	0.354988	0.0550121	0.239299	-0.189509	0.0649464	-0.0789438	0.330037	0.233934	0.270658	0.0737754	-0.00463033	0.146806	0.148586	0.230648	0.0139596	0.0401266	0.146806	0.148586	0.129627	0.197953	0.230648
0.117819	0.151731	0.206058	0.0506083	0.129856	0.133815	0.182116	0.118138	0.0703232	841	0.343248	0.389526	0.453937	0.224963	0.360355	0.365808	0.42675	0.343712	0.265185	841	0.184251	0.152452	0.523381	0.112789	0.230751	-0.0781256	0.252201	0.234479	-0.0824816	0.351492	0.0507794	0.234885	-0.185529	0.0647897	-0.0877934	0.318917	0.230482	0.269723	0.0765794	-0.00631422	0.139675	0.1457	0.224032	0.0188789	0.040701	0.139675	0.1457	0.13168	0.197788	0.224032
0.116545	0.147208	0.196574	0.0467215	0.123971	0.130441	0.177165	0.11978	0.0657492	842	0.341387	0.383677	0.443366	0.216152	0.352095	0.361166	0.42091	0.346092	0.256416	842	0.20308	0.160641	0.532905	0.116063	0.242198	-0.0792797	0.262445	0.239733	-0.0800104	0.360237	0.0443295	0.223332	-0.17727	0.0885108	-0.0914694	0.319936	0.227008	0.263837	0.0805754	0.00189169	0.136313	0.141944	0.219246	0.0228574	0.0575402	0.136313	0.141944	0.135043	0.196458	0.219246
0.125969	0.146967	0.209029	0.0557679	0.125117	0.125842	0.183546	0.118765	0.0667586	843	0.354921	0.383363	0.457197	0.236152	0.353719	0.354742	0.428423	0.344624	0.258377	843	0.203943	0.157536	0.529734	0.116656	0.246514	-0.0903075	0.26668	0.235731	-0.080471	0.362201	0.03842	0.224088	-0.175933	0.0869091	-0.0922026	0.317026	0.230643	0.265239	0.0716089	0.00618887	0.1345	0.145236	0.224882	0.00843878	0.06327	0.1345	0.145236	0.121739	0.202281	0.224882
0.124913	0.140923	0.202753	0.0496875	0.129735	0.136615	0.193084	0.114763	0.0674909	844	0.353431	0.375398	0.450281	0.222907	0.360187	0.369614	0.439414	0.338767	0.25979	844	0.207155	0.146417	0.524704	0.117409	0.254041	-0.0845111	0.268808	0.244332	-0.0848765	0.379268	0.0312316	0.240892	-0.16568	0.0921298	-0.0879247	0.296483	0.236411	0.259892	0.0730441	0.00382053	0.141064	0.151909	0.253109	0.0232473	0.0676332	0.141064	0.151909	0.116049	0.198767	0.253109
0.123983	0.138603	0.198105	0.0505275	0.12336	0.125139	0.194787	0.122865	0.070245	845	0.352113	0.372295	0.44509	0.224783	0.351226	0.35375	0.441346	0.350521	0.265038	845	0.199341	0.144572	0.513305	0.108894	0.244147	-0.10029	0.268508	0.22984	-0.0824856	0.389092	0.0420689	0.262351	-0.145068	0.0934017	-0.0690125	0.295258	0.235435	0.261258	0.0709603	0.00535339	0.140173	0.152919	0.251513	0.0258157	0.0738692	0.140173	0.152919	0.112289	0.205952	0.251513
0.12052	0.145058	0.205804	0.0477093	0.137126	0.122278	0.19467	0.126594	0.0754153	846	0.34716	0.380865	0.453657	0.218425	0.370306	0.349683	0.441215	0.3558	0.274619	846	0.206976	0.155307	0.510598	0.111188	0.248665	-0.105296	0.260796	0.224632	-0.102465	0.401519	0.0362413	0.256469	-0.133798	0.112268	-0.0577305	0.293718	0.222478	0.2601	0.0911491	0.00195072	0.137585	0.156961	0.254407	0.0182899	0.0687957	0.137585	0.156961	0.117947	0.214647	0.254407
0.120332	0.150661	0.206133	0.0524875	0.137179	0.12805	0.194307	0.122726	0.0749685	847	0.346889	0.388151	0.454018	0.229101	0.370377	0.357841	0.440803	0.350322	0.273804	847	0.212773	0.154628	0.513925	0.110107	0.252067	-0.0996994	0.259163	0.227627	-0.101934	0.409294	0.0331721	0.259154	-0.113344	0.104286	-0.062299	0.296361	0.215167	0.26805	0.0820638	-0.00808877	0.12684	0.167757	0.252255	0.0373113	0.0734005	0.12684	0.167757	0.0881601	0.189533	0.252255
0.116791	0.158441	0.190458	0.048119	0.135951	0.128047	0.176942	0.11718	0.0656171	848	0.341747	0.398046	0.436415	0.219361	0.368716	0.357837	0.420644	0.342315	0.256158	848	0.181557	0.149351	0.525832	0.114829	0.255948	-0.110597	0.263574	0.242135	-0.101374	0.377287	0.0127663	0.24549	-0.108628	0.0882035	-0.0955368	0.286226	0.205494	0.26547	0.0761083	-0.0158308	0.111976	0.144184	0.254461	0.0113837	0.0640668	0.111976	0.144184	0.061665	0.174705	0.254461
0.134109	0.151093	0.204228	0.0493743	0.136249	0.132998	0.183662	0.126806	0.0694822	849	0.36621	0.388707	0.451915	0.222203	0.369119	0.364688	0.428558	0.356098	0.263595	849	0.198032	0.140484	0.523346	0.127039	0.259188	-0.120534	0.256716	0.232793	-0.0719632	0.398029	-0.0119444	0.238216	-0.0837607	0.113402	-0.0599049	0.281611	0.236718	0.273533	0.0583993	-0.0234671	0.0944803	0.158062	0.254687	0.005734	0.0659393	0.0944803	0.158062	0.0855218	0.196474	0.254687
0.117488	0.14905	0.213423	0.0525664	0.132738	0.124984	0.188225	0.11094	0.0673455	850	0.342765	0.38607	0.461977	0.229274	0.364333	0.353531	0.433849	0.333077	0.25951	850	0.18001	0.135499	0.538889	0.0803272	0.234735	-0.115672	0.219224	0.226236	-0.0532729	0.391204	-0.030026	0.235528	-0.0581865	0.0870807	-0.0765676	0.276384	0.232849	0.276878	0.0771827	-0.0389867	0.08075	0.159448	0.254101	0.00328319	0.0665372	0.08075	0.159448	0.0923637	0.164881	0.254101
0.121712	0.150411	0.194918	0.0514581	0.117902	0.124048	0.184127	0.121642	0.068895	851	0.348873	0.387829	0.441495	0.226844	0.343368	0.352204	0.429101	0.348773	0.262479	851	0.178525	0.148147	0.553703	0.0895364	0.232324	-0.112935	0.209487	0.222667	-0.067318	0.390377	-0.0440665	0.241143	-0.0764043	0.0507067	-0.107022	0.25618	0.215618	0.288044	0.072577	-0.00825572	0.0895733	0.140309	0.265776	-0.00748656	0.0793161	0.0895733	0.140309	0.0894913	0.192672	0.265776
0.116449	0.141033	0.195662	0.0453424	0.134774	0.12437	0.190209	0.122696	0.0718799	852	0.341246	0.375543	0.442337	0.212938	0.367116	0.352661	0.43613	0.35028	0.268104	852	0.175684	0.152152	0.558677	0.0979733	0.255109	-0.123237	0.197156	0.212842	-0.0603141	0.383642	-0.0310008	0.23742	-0.074596	0.0449133	-0.10921	0.268826	0.203475	0.277212	0.0691526	-0.00217333	0.0914201	0.16316	0.288117	-0.0155361	0.0640539	0.0914201	0.16316	0.0843582	0.206953	0.288117
0.122288	0.139583	0.198615	0.0506155	0.128399	0.123594	0.178652	0.118318	0.0723465	853	0.349698	0.373609	0.445662	0.224979	0.358328	0.35156	0.422673	0.343974	0.268973	853	0.169413	0.145114	0.554671	0.113854	0.251606	-0.117651	0.204158	0.225723	-0.0711017	0.374078	-0.0118775	0.233883	-0.0703305	0.0576904	-0.0948831	0.260043	0.203855	0.268154	0.0868004	-0.0153511	0.0894664	0.195906	0.282131	-0.00111281	0.077808	0.0894664	0.195906	0.0615216	0.20811	0.282131
0.126488	0.141792	0.216277	0.0510632	0.133711	0.12483	0.196396	0.121237	0.0726045	854	0.355651	0.376552	0.465056	0.225972	0.365666	0.353313	0.443166	0.348191	0.269452	854	0.165006	0.148676	0.550322	0.111144	0.256515	-0.114111	0.203302	0.225762	-0.0855801	0.388982	-0.0010089	0.214567	-0.0842457	0.0606444	-0.0975503	0.259733	0.204825	0.267678	0.0837537	-0.015693	0.103446	0.194294	0.285077	0.00431671	0.0780477	0.103446	0.194294	0.0664432	0.208197	0.285077
0.122622	0.141009	0.19945	0.048178	0.130466	0.130598	0.19017	0.121218	0.0665269	855	0.350174	0.375512	0.446598	0.219495	0.361201	0.361384	0.436085	0.348164	0.257928	855	0.170633	0.129375	0.547929	0.099551	0.258584	-0.135957	0.189094	0.209871	-0.07395	0.388259	0.00119514	0.217399	-0.0712566	0.0759057	-0.0855727	0.250892	0.18084	0.279454	0.0521827	-0.0362249	0.0701327	0.19178	0.281768	-0.0101111	0.0627599	0.0701327	0.19178	0.0401706	0.183545	0.281768
0.125008	0.151422	0.20952	0.0533561	0.123656	0.126968	0.183365	0.118521	0.0679842	856	0.353564	0.38913	0.457733	0.230989	0.351648	0.356326	0.428211	0.344269	0.260738	856	0.175788	0.128017	0.546871	0.0944669	0.248733	-0.137881	0.18639	0.21232	-0.0619783	0.389463	0.0215212	0.233324	-0.0566196	0.0864876	-0.0859851	0.270999	0.22298	0.324761	0.0843024	-0.0195422	0.0873787	0.217506	0.307378	0.0107005	0.0731156	0.0873787	0.217506	0.0600321	0.185586	0.307378
0.116143	0.149628	0.20567	0.0507004	0.128542	0.130443	0.185265	0.111753	0.0640451	857	0.340798	0.386817	0.453509	0.225167	0.358528	0.36117	0.430425	0.334295	0.253071	857	0.168489	0.116954	0.530145	0.0977786	0.248485	-0.134682	0.179905	0.211044	-0.0530789	0.355814	0.0154436	0.241481	-0.0449102	0.0647234	-0.0951262	0.202303	0.196032	0.34225	0.108974	-0.0683938	0.0603173	0.247702	0.281806	-0.00523549	0.109762	0.0603173	0.247702	0.0450834	0.20714	0.281806
0.125501	0.152494	0.195861	0.050164	0.1298	0.128602	0.187318	0.123073	0.0683304	858	0.354261	0.390505	0.442562	0.223973	0.360278	0.358612	0.432803	0.350817	0.261401	858	0.174215	0.122712	0.539166	0.101918	0.251766	-0.134445	0.170414	0.200237	-0.0664953	0.353515	0.0179297	0.244299	-0.0356008	0.0752331	-0.0829667	0.192597	0.173425	0.29986	0.0821642	-0.0637874	0.0611643	0.245629	0.277049	-0.00232407	0.120695	0.0611643	0.245629	0.0589173	0.218014	0.277049
0.11848	0.144432	0.206611	0.0471239	0.126089	0.122281	0.185169	0.123978	0.0712062	859	0.344209	0.380042	0.454545	0.21708	0.35509	0.349686	0.430313	0.352105	0.266845	859	0.18052	0.131282	0.563437	0.102383	0.257499	-0.14287	0.164648	0.202175	-0.0567717	0.36262	0.0131372	0.246322	-0.0429745	0.0664449	-0.0814141	0.193132	0.181184	0.30429	0.0844667	-0.0555764	0.0626692	0.246877	0.283562	-0.0130315	0.121556	0.0626692	0.246877	0.054553	0.212289	0.283562
0.122203	0.148669	0.200065	0.049104	0.133152	0.128221	0.179142	0.126267	0.0683073	860	0.349575	0.385576	0.447286	0.221594	0.3649	0.35808	0.423252	0.355341	0.261357	860	0.177515	0.140704	0.566334	0.101836	0.260708	-0.148539	0.165419	0.206713	-0.0563977	0.35739	0.0134594	0.242105	-0.0410831	0.0717676	-0.0783383	0.208659	0.179841	0.318983	0.0762102	-0.0710521	0.0527184	0.246218	0.284692	-0.0216272	0.12713	0.0527184	0.246218	0.054889	0.21326	0.284692
0.120612	0.149803	0.201955	0.0494019	0.126094	0.125731	0.186308	0.125967	0.0745426	861	0.347293	0.387044	0.449395	0.222265	0.355097	0.354586	0.431634	0.354918	0.273025	861	0.175262	0.142104	0.566522	0.0944967	0.260056	-0.143402	0.161118	0.207049	-0.0570114	0.357661	0.00893934	0.235645	-0.0396882	0.0638161	-0.0805141	0.208327	0.178429	0.322576	0.0791561	-0.0691597	0.0552793	0.247892	0.282392	-0.0217549	0.128805	0.0552793	0.247892	0.058619	0.189153	0.282392
0.119825	0.14879	0.194369	0.0485048	0.13421	0.12949	0.203947	0.114684	0.0657516	862	0.346157	0.385732	0.440873	0.220238	0.366346	0.359847	0.451605	0.338651	0.256421	862	0.165495	0.148584	0.56961	0.108281	0.275222	-0.147394	0.162987	0.224944	-0.061688	0.351428	0.000939948	0.223901	-0.038509	0.0511586	-0.108659	0.21178	0.184285	0.32814	0.0762085	-0.0713436	0.0616482	0.25408	0.289942	-0.0248603	0.129038	0.0616482	0.25408	0.0532135	0.191524	0.289942
0.121937	0.138032	0.206354	0.0502981	0.129377	0.131401	0.175582	0.122263	0.0687261	863	0.349195	0.371526	0.454262	0.224272	0.35969	0.362492	0.419025	0.349661	0.262157	863	0.168518	0.151518	0.570052	0.108486	0.277058	-0.153301	0.165688	0.22642	-0.0378335	0.358491	-0.0172573	0.22397	-0.0687425	0.0732617	-0.0777172	0.219419	0.188319	0.337283	0.0802288	-0.0469796	0.0871249	0.25471	0.293773	-0.0293886	0.138751	0.0871249	0.25471	0.0189971	0.188585	0.293773
0.122001	0.152518	0.21004	0.0493804	0.129699	0.126433	0.193828	0.121688	0.0696228	864	0.349286	0.390535	0.458301	0.222217	0.360138	0.355574	0.440259	0.348838	0.263861	864	0.179219	0.153694	0.570766	0.112209	0.276159	-0.151969	0.163315	0.216632	-0.016103	0.376232	0.00950531	0.243866	-0.0942389	0.089641	-0.0867994	0.22366	0.196836	0.333513	0.0859754	-0.0538218	0.0690401	0.260941	0.291559	-0.0260174	0.134276	0.0690401	0.260941	0.0228686	0.181188	0.291559
0.121342	0.139241	0.207365	0.0446029	0.118571	0.12642	0.187479	0.116019	0.0652148	865	0.348341	0.37315	0.455374	0.211194	0.344342	0.355556	0.432989	0.340616	0.255372	865	0.173831	0.150867	0.569759	0.111015	0.277064	-0.156932	0.158475	0.212678	-0.0321328	0.377981	-0.00538811	0.241253	-0.11367	0.0856	-0.0898147	0.2233	0.189186	0.336424	0.0716495	-0.0665284	0.0602051	0.258584	0.290185	-0.0288418	0.135095	0.0602051	0.258584	0.0145314	0.169235	0.290185
0.11491	0.14808	0.19174	0.0482702	0.131683	0.128986	0.181181	0.123958	0.0688873	866	0.338983	0.384812	0.437881	0.219705	0.362882	0.359147	0.425653	0.352077	0.262464	866	0.16512	0.145597	0.559757	0.125214	0.272537	-0.162291	0.163723	0.223514	-0.0148094	0.380075	-0.045333	0.246907	-0.0985992	0.0711945	-0.120717	0.250298	0.197061	0.339366	0.0714982	-0.0668737	0.0630335	0.201271	0.298939	-0.00824423	0.115419	0.0630335	0.201271	0.0102623	0.174348	0.298939
0.115414	0.144141	0.202133	0.0486498	0.130746	0.134212	0.184807	0.123906	0.0681766	867	0.339726	0.379659	0.449592	0.220567	0.361588	0.366349	0.429892	0.352002	0.261106	867	0.17083	0.132978	0.558245	0.138969	0.280205	-0.16946	0.181656	0.229125	-0.0131541	0.386195	-0.0342922	0.24625	-0.0996689	0.0656491	-0.122964	0.242735	0.202327	0.348004	0.0671543	-0.0492367	0.0692012	0.219503	0.302021	-0.0139405	0.120751	0.0692012	0.219503	0.0077269	0.156262	0.302021
0.127082	0.146282	0.211084	0.0492376	0.127741	0.125405	0.189765	0.123961	0.0728667	868	0.356485	0.382468	0.459439	0.221896	0.357409	0.354126	0.43562	0.352081	0.269938	868	0.177063	0.148826	0.570705	0.16238	0.317956	-0.147117	0.192456	0.211559	-0.00624696	0.390632	-0.0255354	0.260713	-0.0910955	0.0691855	-0.128011	0.253911	0.208424	0.358659	0.0777306	-0.0536903	0.0593871	0.232224	0.323959	0.00439485	0.119826	0.0593871	0.232224	0.0178343	0.141465	0.323959
0.11859	0.152044	0.206869	0.049912	0.127607	0.126171	0.178059	0.110575	0.0650848	869	0.344368	0.389929	0.454829	0.22341	0.357222	0.355206	0.42197	0.332527	0.255117	869	0.178133	0.132407	0.573852	0.160136	0.321068	-0.16212	0.179683	0.193672	-0.0078053	0.390162	-0.0239898	0.259129	-0.095499	0.0721967	-0.129495	0.255125	0.203807	0.364803	0.0680016	-0.0754619	0.0332898	0.230847	0.324245	0.00525721	0.116413	0.0332898	0.230847	0.00196278	0.146263	0.324245
0.11718	0.155543	0.181978	0.0501765	0.120927	0.124548	0.175176	0.118561	0.0672151	870	0.342315	0.39439	0.426589	0.224001	0.347745	0.352914	0.418541	0.344327	0.259259	870	0.174611	0.133184	0.559662	0.162931	0.31453	-0.163282	0.178621	0.192414	-0.00938615	0.404275	-0.0339026	0.272834	-0.0930113	0.0829508	-0.121841	0.258041	0.198925	0.369472	0.0734432	-0.0657031	0.0412139	0.219872	0.336329	-0.000927727	0.113234	0.0412139	0.219872	0.00787002	0.156188	0.336329
0.129858	0.154674	0.201437	0.0558526	0.133094	0.130065	0.188566	0.118676	0.0671775	871	0.360358	0.393287	0.448817	0.236332	0.364821	0.360645	0.434241	0.344494	0.259186	871	0.193472	0.123128	0.56494	0.148279	0.315293	-0.169635	0.183598	0.195237	0.0524573	0.4167	-0.0524201	0.294713	-0.0495906	0.0993059	-0.0813957	0.287336	0.167002	0.376932	0.0412473	-0.0558391	0.0431579	0.200237	0.345613	0.0167683	0.123201	0.0431579	0.200237	-0.0204864	0.139602	0.345613
0.123455	0.14175	0.205932	0.0517984	0.128117	0.126097	0.183007	0.115175	0.0659891	872	0.351362	0.376497	0.453797	0.227593	0.357934	0.355102	0.427793	0.339375	0.256883	872	0.161339	0.108976	0.549191	0.125566	0.300839	-0.19879	0.175247	0.190701	0.0571303	0.382629	-0.0799954	0.287606	-0.0504488	0.0981566	-0.0729539	0.27883	0.16374	0.378853	0.0612107	-0.0498179	0.0549711	0.168396	0.331272	-0.0190591	0.113914	0.0549711	0.168396	-0.0325471	0.13585	0.331272
0.117459	0.141123	0.19946	0.0478356	0.127579	0.124162	0.189427	0.117417	0.0664079	873	0.342723	0.375663	0.44661	0.218713	0.357183	0.352366	0.435232	0.342662	0.257697	873	0.172609	0.110814	0.533706	0.117631	0.282657	-0.207368	0.183768	0.203511	0.0645548	0.39262	-0.0779618	0.282018	-0.0563598	0.097035	-0.0747703	0.270595	0.15955	0.374038	0.0591701	-0.0440903	0.0633417	0.164176	0.335651	-0.0131649	0.120201	0.0633417	0.164176	-0.0294623	0.137775	0.335651
0.129182	0.143567	0.213697	0.0527239	0.128701	0.12176	0.19253	0.120827	0.0725353	874	0.359419	0.378902	0.462273	0.229617	0.35875	0.348941	0.438783	0.347602	0.269324	874	0.181643	0.105082	0.537944	0.119626	0.267681	-0.196984	0.169657	0.202856	0.0576919	0.398799	-0.0739365	0.263702	-0.0437173	0.0814829	-0.0753213	0.264806	0.160259	0.375057	0.0585389	-0.0399406	0.061183	0.165706	0.321922	-0.00484331	0.108086	0.061183	0.165706	-0.0317455	0.136636	0.321922
0.121069	0.150176	0.200731	0.0484417	0.125464	0.1324	0.186117	0.111727	0.064695	875	0.347949	0.387526	0.448031	0.220095	0.354208	0.363869	0.431413	0.334257	0.254352	875	0.190748	0.0744309	0.52374	0.109411	0.286664	-0.221787	0.159213	0.174315	0.064752	0.410407	-0.0728513	0.257816	-0.0408618	0.0839476	-0.0719966	0.241305	0.151235	0.397737	0.0392232	-0.0546965	0.0291549	0.15552	0.337081	-0.0244797	0.0969061	0.0291549	0.15552	-0.037338	0.133005	0.337081
0.125406	0.148251	0.199708	0.0496063	0.136746	0.126439	0.196848	0.116331	0.0725646	876	0.354127	0.385034	0.446887	0.222725	0.369792	0.355582	0.443675	0.341073	0.269378	876	0.188797	0.0813297	0.526156	0.116939	0.286664	-0.216311	0.170517	0.18607	0.0633362	0.41088	-0.0729338	0.249566	-0.0432731	0.0938258	-0.0613301	0.251047	0.173137	0.399664	0.0521361	-0.0267651	0.0693334	0.168359	0.341912	-0.0157238	0.110567	0.0693334	0.168359	-0.0204675	0.161625	0.341912
0.115702	0.145463	0.203755	0.0481224	0.127653	0.126651	0.189243	0.11971	0.065506	877	0.340149	0.381396	0.451393	0.219368	0.357286	0.355881	0.43502	0.345991	0.255941	877	0.188951	0.0765169	0.523804	0.0978386	0.288915	-0.24329	0.17653	0.172328	0.0527845	0.406288	-0.0814077	0.250988	-0.0593608	0.0990268	-0.0671389	0.251753	0.174003	0.394546	0.061775	-0.0314433	0.0677587	0.163135	0.34151	-0.021775	0.111015	0.0677587	0.163135	-0.0653544	0.173923	0.34151
0.118431	0.144457	0.206096	0.0493014	0.128445	0.129783	0.185261	0.112533	0.066885	878	0.344138	0.380074	0.453978	0.222039	0.358393	0.360254	0.430419	0.335459	0.258621	878	0.185868	0.0851882	0.527099	0.114086	0.295079	-0.240603	0.167547	0.149073	0.0501415	0.400771	-0.087207	0.246929	-0.0583085	0.10368	-0.0590638	0.257349	0.179806	0.397364	0.0567506	-0.0420881	0.0602085	0.177178	0.346498	-0.0228849	0.0976373	0.0602085	0.177178	-0.0732317	0.143163	0.346498
0.134179	0.142571	0.204912	0.0509488	0.126825	0.137076	0.187822	0.124167	0.0685731	879	0.366305	0.377585	0.452673	0.225718	0.356125	0.370238	0.433384	0.352373	0.261865	879	0.199485	0.0952777	0.536001	0.107567	0.27972	-0.257689	0.155335	0.127021	0.0590987	0.410765	-0.092539	0.232112	-0.0786045	0.0936251	-0.0761322	0.261464	0.171527	0.384278	0.044344	-0.0370744	0.0539837	0.167583	0.328282	-0.043701	0.0926779	0.0539837	0.167583	-0.0635397	0.154533	0.328282
0.11706	0.146849	0.207221	0.0495491	0.129599	0.132332	0.175059	0.126068	0.0696375	880	0.342141	0.383209	0.455215	0.222596	0.359999	0.363775	0.418401	0.355061	0.263889	880	0.223819	0.0782796	0.531413	0.104552	0.235625	-0.283892	0.120484	0.127777	0.0605242	0.417202	-0.0897268	0.2519	-0.0781659	0.101693	-0.0709856	0.257278	0.167904	0.371022	0.0437674	-0.0467366	0.0473911	0.164845	0.31199	-0.0477557	0.0798484	0.0473911	0.164845	-0.0666713	0.151548	0.31199
0.122445	0.144987	0.192224	0.0508024	0.12483	0.124371	0.190976	0.121431	0.0730189	881	0.349921	0.380772	0.438433	0.225394	0.353313	0.352663	0.437008	0.348469	0.27022	881	0.21914	0.0612423	0.522323	0.1198	0.249568	-0.27773	0.133903	0.132378	0.0601464	0.416906	-0.0938304	0.249088	-0.0762566	0.0977999	-0.0733581	0.256282	0.150069	0.353505	0.0485533	-0.0682486	0.0389421	0.159742	0.307947	-0.0447136	0.0734403	0.0389421	0.159742	-0.0498128	0.138515	0.307947
0.121992	0.156075	0.198266	0.0469097	0.126635	0.126573	0.183924	0.119941	0.0674069	882	0.349274	0.395063	0.445271	0.216586	0.355858	0.355771	0.428863	0.346326	0.259628	882	0.225612	0.0683826	0.522592	0.122785	0.249982	-0.288794	0.128831	0.11741	0.0594706	0.430737	-0.0884824	0.244489	-0.0869635	0.0970642	-0.0838196	0.266399	0.149746	0.351995	0.0598016	-0.0580508	0.0635207	0.165595	0.304011	-0.0694435	0.0633318	0.0635207	0.165595	-0.0525645	0.139668	0.304011
0.112202	0.149235	0.191816	0.0463225	0.125148	0.126019	0.192769	0.115858	0.0709254	883	0.334966	0.38631	0.437968	0.215227	0.353762	0.354991	0.439054	0.340379	0.266318	883	0.226721	0.0848084	0.533033	0.123951	0.248514	-0.28109	0.137646	0.135866	0.0824191	0.461232	-0.0922457	0.245637	-0.0797688	0.100146	-0.0565144	0.28878	0.15417	0.345387	0.0711261	-0.0252845	0.108895	0.171156	0.300567	-0.0577721	0.0922673	0.108895	0.171156	-0.049901	0.141701	0.300567
0.127788	0.154131	0.200707	0.0565755	0.125175	0.137943	0.188224	0.12829	0.0720706	884	0.357475	0.392595	0.448003	0.237856	0.353801	0.371406	0.433848	0.358176	0.26846	884	0.218986	0.1052	0.519439	0.141738	0.237437	-0.270093	0.116548	0.148212	0.0614861	0.469365	-0.10409	0.251223	-0.0849607	0.112217	-0.0612526	0.270997	0.178321	0.320914	0.0752475	-0.0516156	0.111358	0.170356	0.301441	-0.0471142	0.0891472	0.111358	0.170356	-0.0535529	0.129467	0.301441
0.115032	0.146333	0.20521	0.0498056	0.130891	0.124974	0.192758	0.108806	0.0696496	885	0.339164	0.382535	0.453002	0.223172	0.361789	0.353516	0.439043	0.329858	0.263912	885	0.191746	0.082979	0.50052	0.158899	0.193513	-0.292251	0.0580414	0.10365	0.0667827	0.443784	-0.109738	0.223022	-0.0898346	0.0812236	-0.0821087	0.271631	0.144785	0.338792	0.0940608	-0.0211376	0.138554	0.185528	0.235459	-0.0727559	0.00175962	0.138554	0.185528	-0.0707489	0.101903	0.235459
0.112484	0.145741	0.214015	0.0477126	0.123461	0.129677	0.181193	0.114891	0.065328	886	0.335387	0.38176	0.462617	0.218432	0.351371	0.360107	0.425668	0.338956	0.255593	886	0.202759	0.0890637	0.511732	0.165824	0.202177	-0.280599	0.0429845	0.119687	0.0620833	0.447931	-0.122352	0.246733	-0.0864959	0.0934138	-0.0627609	0.266699	0.138692	0.330623	0.0857718	-0.00782003	0.130535	0.174256	0.246403	-0.0771048	0.0167586	0.130535	0.174256	-0.0878386	0.124333	0.246403
0.122502	0.150896	0.199577	0.050427	0.129518	0.123234	0.196654	0.118496	0.0718258	887	0.350003	0.388454	0.44674	0.224559	0.359887	0.351046	0.443457	0.344232	0.268003	887	0.227738	0.130857	0.522569	0.162409	0.228904	-0.284166	0.0399089	0.113833	0.0697693	0.459622	-0.117943	0.256482	-0.0819492	0.0984861	-0.0546963	0.284652	0.149609	0.326145	0.0977326	0.00548894	0.152069	0.173709	0.258965	-0.0758491	0.0189613	0.152069	0.173709	-0.0894747	0.122891	0.258965
0.127769	0.152219	0.206259	0.0522115	0.123088	0.13378	0.170767	0.11639	0.067863	888	0.357448	0.390152	0.454158	0.228498	0.350838	0.365759	0.413239	0.34116	0.260505	888	0.22084	0.110389	0.511967	0.146357	0.222934	-0.314496	0.0172033	0.0735467	0.0697768	0.454354	-0.12854	0.263925	-0.102563	0.0947703	-0.0719463	0.286177	0.157693	0.32984	0.116912	0.0238794	0.176367	0.168312	0.265684	-0.0890984	0.0191909	0.176367	0.168312	-0.095355	0.129117	0.265684
0.12126	0.151161	0.196045	0.0505135	0.127722	0.124073	0.172442	0.115411	0.0635722	889	0.348224	0.388794	0.442769	0.224752	0.357382	0.35224	0.415261	0.339722	0.252135	889	0.195721	0.0922057	0.501947	0.148522	0.184706	-0.309247	0.00341389	0.0369168	0.0594428	0.437414	-0.121619	0.24962	-0.0676863	0.102859	-0.0618775	0.272922	0.163737	0.321667	0.141749	0.0294948	0.177802	0.17456	0.235208	-0.0706663	0.013267	0.177802	0.17456	-0.0951026	0.133072	0.235208
0.128321	0.147832	0.206497	0.0495257	0.123745	0.134676	0.181539	0.115967	0.0707241	890	0.358219	0.38449	0.45442	0.222544	0.351775	0.366982	0.426074	0.340539	0.26594	890	0.186224	0.0944264	0.500909	0.146356	0.186193	-0.307298	0.00486948	0.0420819	0.058158	0.422669	-0.110338	0.250849	-0.0565478	0.113747	-0.0241487	0.279091	0.164846	0.320079	0.135717	0.0263579	0.169409	0.171354	0.239997	-0.0551993	0.0181348	0.169409	0.171354	-0.0900285	0.137334	0.239997
0.114286	0.143842	0.192976	0.0480671	0.12007	0.128894	0.190488	0.113761	0.0664891	891	0.338063	0.379265	0.43929	0.219242	0.346511	0.359018	0.436449	0.337285	0.257855	891	0.181187	0.0862716	0.501891	0.159429	0.16375	-0.302337	0.0126164	0.020217	0.0589005	0.422435	-0.103221	0.248488	-0.0527715	0.117318	-0.0328254	0.280026	0.178738	0.32056	0.14233	0.0333214	0.15479	0.177472	0.239192	-0.0516506	0.0215335	0.15479	0.177472	-0.0891759	0.138866	0.239192
0.118744	0.140449	0.211425	0.048989	0.121545	0.135468	0.185021	0.120208	0.0714271	892	0.344592	0.374765	0.459809	0.221335	0.348632	0.36806	0.430141	0.34671	0.267259	892	0.165675	0.0770467	0.503417	0.145952	0.157667	-0.283227	-0.000896145	0.018109	0.0568569	0.41438	-0.098567	0.265847	-0.0674992	0.123237	-0.0360338	0.280165	0.170086	0.325441	0.151324	0.0253876	0.152086	0.176227	0.234827	-0.0479414	0.0193461	0.152086	0.176227	-0.0840785	0.132804	0.234827
[truncated: 14,108 more rows]
[truncated: 6 more columns]

## Sheet: Prepared_PLDP_table_complet_
Table -Persistency of LD between pairs of studied populations (Complet form)
[truncated: 38 more rows]

## Sheet: Charts_Based_On_Each_Population
	AZI_KHU	AZI_MAZ	AZI_IR	AZI_ANA	AZI_EGY	AZI_KUN	AZI_NIL	AZI_PAK				KHU_AZI	KHU_MAZ	KHU_IR	KHU_ANA	KHU_EGY	KHU_KUN	KHU_NIL	KHU_PAK				MAZ_AZI	MAZ_KHU	MAZ_IR	MAZ_ANA	MAZ_EGY	MAZ_KUN	MAZ_NIL	MAZ_PAK				IR_AZI	IR_KHU	IR_MAZ	IR_ANA	IR_EGY	IR_KUN	IR_NIL	IR_PAK				ANA_AZI	ANA_KHU	ANA_MAZ	ANA_IR	ANA-EGY
[truncated: 10 more rows]
[truncated: 39 more columns]
